# Supplementary material for: Dual functions of the ZmCCT-associated quantitative trait locus in flowering and stress responses under long-day conditions
Source: BMC Plant Biol. 2016 Nov 3;16:239. doi: 10.1186/s12870-016-0930-1 (PMC5094027; doi:10.1186/s12870-016-0930-1)
Supplement: Additional file 4: — Table S6. Molecular markers developed for fine mapping of qDPS10 on chromosome 10. (XLSX 358 kb) [file 12870_2016_930_MOESM4_ESM.xlsx]

## Sheet: LHZ4
gene_id	SPOT	Profile	L3H4	L4H4	L5H4	L6H4
GRMZM5G873295	ID_3	20	0	8.32	12.19	1.24
GRMZM5G866334	ID_4	20	0	161.8	263.48	-10.98
GRMZM5G864903	ID_5	20	0	10.35	8.67	4.45
GRMZM5G836174	ID_20	20	0	1826.61	2342.08	138.72
GRMZM5G832939	ID_22	20	0	705.02	1204.96	36.73
GRMZM5G831843	ID_23	20	0	34.64	42.64	-18.31
GRMZM2G477503	ID_40	20	0	161.69	221.39	23.23
GRMZM2G474755	ID_42	20	0	7.91	11.02	2.58
GRMZM2G466044	ID_48	20	0	10.27	7.93	1.99
GRMZM2G465383	ID_49	20	0	6.44	12.04	-1.95
GRMZM2G448834	ID_57	20	0	4.52	7.98	-1.26
GRMZM2G425863	ID_70	20	0	14.18	25.93	0.55
GRMZM2G424832	ID_72	20	0	7.34	4.97	-0.47
GRMZM2G422671	ID_74	20	0	5.21	7.63	0.7
GRMZM2G420012	ID_79	20	0	13.74	17.13	-0.16
GRMZM2G397055	ID_90	20	0	4.32	3.14	0.29
GRMZM2G394500	ID_95	20	0	15.64	23.04	-4.83
GRMZM2G365961	ID_115	20	0	5.67	9.84	-2.89
GRMZM2G320606	ID_138	20	0	2.83	4	0.84
GRMZM2G315848	ID_145	20	0	42.25	58.26	8.07
GRMZM2G311898	ID_150	20	0	11.17	9.82	1.72
GRMZM2G174347	ID_172	20	0	13.7	19.58	3.72
GRMZM2G172834	ID_174	20	0	41.4	68.17	-2.98
GRMZM2G169593	ID_181	20	0	4.01	4.33	-3.08
GRMZM2G168707	ID_186	20	0	25.61	53.42	-2.28
GRMZM2G168364	ID_187	20	0	5.34	4.25	-0.53
GRMZM2G166548	ID_191	20	0	7.41	15.73	0.15
GRMZM2G164467	ID_195	20	0	2.75	4.54	0.2
GRMZM2G159119	ID_210	20	0	23.02	38.98	3.83
GRMZM2G157027	ID_219	20	0	2.15	5.36	-1.32
GRMZM2G155281	ID_220	20	0	13.46	28.87	-8.18
GRMZM2G147966	ID_239	20	0	2.5	1.71	0.29
GRMZM2G147014	ID_241	20	0	5.6	6.32	0.92
GRMZM2G134334	ID_268	20	0	18.66	17.18	-15.02
GRMZM2G134054	ID_270	20	0	38.83	65.89	6.21
GRMZM2G125838	ID_284	20	0	48.97	80.08	14.7
GRMZM2G118951	ID_299	20	0	9.74	11.97	0.75
GRMZM2G118610	ID_302	20	0	67.31	109.47	-9.28
GRMZM2G117153	ID_306	20	0	6.55	11.09	1.22
GRMZM2G106748	ID_320	20	0	23.05	31.27	4.88
GRMZM2G092363	ID_341	20	0	6.65	8.87	-4.51
GRMZM2G085661	ID_350	20	0	16.87	17.65	2.81
GRMZM2G085236	ID_352	20	0	4.34	7.02	0.83
GRMZM2G085078	ID_353	20	0	0.54	1.43	-0.86
GRMZM2G084958	ID_354	20	0	57.92	82.23	3.86
GRMZM2G079956	ID_360	20	0	8.51	6.61	-0.21
GRMZM2G078500	ID_364	20	0	19.1	38.54	-1.08
GRMZM2G077415	ID_366	20	0	59.07	42.67	4.01
GRMZM2G077316	ID_367	20	0	4.44	9.27	-1.58
GRMZM2G072780	ID_374	20	0	2.86	4.72	0.21
GRMZM2G071277	ID_381	20	0	9.25	7.15	2.28
GRMZM2G065203	ID_394	20	0	3.15	3.29	-0.57
GRMZM2G062197	ID_400	20	0	35.97	34.18	1.57
GRMZM2G059151	ID_404	20	0	45.24	62.7	10.15
GRMZM2G055936	ID_409	20	0	291.91	602.98	-54.93
GRMZM2G054123	ID_412	20	0	49.6	94.36	-3.94
GRMZM2G054050	ID_413	20	0	7.86	8.96	1.22
GRMZM2G053322	ID_416	20	0	251.45	379.68	59.85
GRMZM2G045473	ID_426	20	0	1.29	1.54	-0.17
GRMZM2G029546	ID_456	20	0	32.98	53.67	-12.92
GRMZM2G027723	ID_461	20	0	2.76	1.61	0.26
GRMZM2G025832	ID_464	20	0	30.75	57.66	-5.33
GRMZM2G024705	ID_466	20	0	15.83	25.05	1.5
GRMZM2G023840	ID_467	20	0	8.59	14.97	1.2
GRMZM2G013430	ID_483	20	0	11.66	25.21	-2.53
GRMZM2G011025	ID_486	20	0	8.33	16.36	-0.34
AC225718.2_FG006	ID_506	20	0	50.69	29.45	9.77
AC209374.4_FG002	ID_512	20	0	43.86	68.23	-4.63
AC208915.3_FG010	ID_513	20	0	147.12	101.12	2.58
AC208201.3_FG002	ID_514	20	0	3.31	3.88	-0.49
AC197555.3_FG008	ID_535	20	0	12.14	8.3	0.18
AC197705.4_FG011	ID_538	20	0	19.51	11.88	7.88
AC204212.4_FG001	ID_547	20	0	309.6	357.82	-9.99
AC204611.4_FG001	ID_549	20	0	39.95	76.72	6.52
AC208110.2_FG007	ID_557	20	0	94.89	97.14	25.94
AC212728.3_FG001	ID_572	20	0	9.95	6.52	0.26
AC232238.2_FG008	ID_578	20	0	4.26	5.4	0.11
AC234154.1_FG008	ID_581	20	0	10.17	13.86	0.59
GRMZM2G001514	ID_594	20	0	10.68	17.84	-1.62
GRMZM2G002568	ID_597	20	0	9.78	10.01	0.95
GRMZM2G006352	ID_615	20	0	2.84	4.36	0.23
GRMZM2G015892	ID_663	20	0	45.37	66.8	4.28
GRMZM2G016370	ID_665	20	0	52.86	91.21	6.24
GRMZM2G016649	ID_668	20	0	1.28	1.05	-0.1
GRMZM2G017416	ID_676	20	0	27.28	27.65	8.73
GRMZM2G018275	ID_683	20	0	92.06	150.46	3.34
GRMZM2G018820	ID_687	20	0	707.04	1363.6	34.3
GRMZM2G020429	ID_696	20	0	68.15	131.36	3.94
GRMZM2G022054	ID_701	20	0	10.73	11.82	4.67
GRMZM2G025895	ID_716	20	0	11.48	13.54	4.92
GRMZM2G030216	ID_730	20	0	1.09	1.26	0.08
GRMZM2G033971	ID_744	20	0	96.91	134.7	-2.33
GRMZM2G035994	ID_756	20	0	4.81	8.83	0.41
GRMZM2G037189	ID_763	20	0	19.36	29.43	-6.28
GRMZM2G039797	ID_771	20	0	30.72	56.54	1.37
GRMZM2G040033	ID_774	20	0	5.06	8.54	0.81
GRMZM2G042323	ID_785	20	0	61.67	121.16	10.73
GRMZM2G052562	ID_827	20	0	1.95	4.6	-1.07
GRMZM2G053319	ID_832	20	0	25.9	49.63	2.95
GRMZM2G054807	ID_840	20	0	3.05	3.24	1.58
GRMZM2G056355	ID_849	20	0	61.51	100.69	9.88
GRMZM2G057140	ID_854	20	0	8.06	11.8	0.29
GRMZM2G060311	ID_867	20	0	150.39	275.09	16.83
GRMZM2G061408	ID_871	20	0	11.63	13.54	5.21
GRMZM2G062541	ID_878	20	0	8.05	7.23	1.21
GRMZM2G064962	ID_890	20	0	76.8	156.95	4.47
GRMZM2G066291	ID_895	20	0	4.3	5.77	1
GRMZM2G066636	ID_898	20	0	136.46	94.52	-25.84
GRMZM2G067036	ID_900	20	0	5.42	11.18	0.19
GRMZM2G067520	ID_902	20	0	4.6	8.84	0.39
GRMZM2G068917	ID_905	20	0	4.37	13.05	-9.18
GRMZM2G068967	ID_906	20	0	21.17	30.58	5.38
GRMZM2G069126	ID_907	20	0	5.05	6.77	0.77
GRMZM2G071977	ID_924	20	0	7.76	17.71	-9.7
GRMZM2G072814	ID_927	20	0	22.6	21.63	4.54
GRMZM2G078275	ID_955	20	0	5.82	8.77	2.02
GRMZM2G078723	ID_961	20	0	8.7	9.14	2.71
GRMZM2G079490	ID_965	20	0	3.3	2.95	-1.67
GRMZM2G080516	ID_970	20	0	7.15	13.85	0.13
GRMZM2G083130	ID_984	20	0	8.23	18.91	-2.16
GRMZM2G083472	ID_987	20	0	41.55	36.67	-30.7
GRMZM2G084547	ID_995	20	0	105.65	182.86	12.01
GRMZM2G084812	ID_997	20	0	39.23	23.12	-7.42
GRMZM2G085054	ID_999	20	0	34.46	59.17	9.21
GRMZM2G085705	ID_1004	20	0	5.64	8.86	0.34
GRMZM2G088053	ID_1014	20	0	10.85	14.89	0.05
GRMZM2G088539	ID_1016	20	0	17.14	37.82	-7.81
GRMZM2G090594	ID_1029	20	0	3.55	6.46	-1.14
GRMZM2G091435	ID_1034	20	0	24.36	42.74	-0.2
GRMZM2G091578	ID_1037	20	0	1.36	2.17	-1.35
GRMZM2G092813	ID_1043	20	0	2.76	1.69	0.94
GRMZM2G096358	ID_1052	20	0	2.44	3.96	0.07
GRMZM2G098793	ID_1061	20	0	15.63	17.67	-1.46
GRMZM2G099052	ID_1062	20	0	10.51	17.7	2.77
GRMZM2G100372	ID_1067	20	0	0.59	1.07	-0.35
GRMZM2G101754	ID_1073	20	0	2.1	4.62	-0.22
GRMZM2G105775	ID_1096	20	0	1.19	1.84	0.3
GRMZM2G107629	ID_1106	20	0	15.16	19.42	0.03
GRMZM2G108396	ID_1108	20	0	29.69	15.51	-1.74
GRMZM2G109547	ID_1119	20	0	2.08	5.57	-2.33
GRMZM2G110145	ID_1123	20	0	12.71	6.81	-1.09
GRMZM2G111455	ID_1132	20	0	16.77	25.19	1.9
GRMZM2G113351	ID_1140	20	0	8.07	13.87	1.84
GRMZM2G117993	ID_1167	20	0	18.81	31.53	3.08
GRMZM2G119468	ID_1175	20	0	2.88	2.72	0.75
GRMZM2G119783	ID_1180	20	0	6.88	5.05	1.84
GRMZM2G120724	ID_1182	20	0	0.69	0.8	-0.68
GRMZM2G121166	ID_1184	20	0	16.77	31.15	-3.88
GRMZM2G121223	ID_1185	20	0	14.89	22.63	1.93
GRMZM2G122277	ID_1195	20	0	18.13	17.61	-7.17
GRMZM2G125266	ID_1205	20	0	46.42	89.2	5.72
GRMZM2G125314	ID_1207	20	0	89.84	102.63	-16.87
GRMZM2G125923	ID_1214	20	0	6.54	12.05	0.32
GRMZM2G127386	ID_1220	20	0	1.23	3.21	-2.44
GRMZM2G128922	ID_1228	20	0	16.27	33.84	-5.02
GRMZM2G133407	ID_1249	20	0	11.07	19.92	0.77
GRMZM2G135839	ID_1258	20	0	40.29	74.91	7.58
GRMZM2G139815	ID_1278	20	0	4.36	3.76	-0.85
GRMZM2G141320	ID_1282	20	0	165.2	258.04	47.41
GRMZM2G141665	ID_1284	20	0	40.36	82.29	1.86
GRMZM2G141731	ID_1285	20	0	69.12	118.43	-0.25
GRMZM2G142748	ID_1287	20	0	5.35	4.03	0.11
GRMZM2G147221	ID_1303	20	0	83.59	137.85	8.81
GRMZM2G149335	ID_1312	20	0	3.8	4.01	-3.99
GRMZM2G152549	ID_1331	20	0	10.2	19.4	1.01
GRMZM2G153527	ID_1335	20	0	1.96	3.09	0.42
GRMZM2G154936	ID_1347	20	0	3.89	5.7	-0.37
GRMZM2G159937	ID_1363	20	0	1.92	3.81	0.05
GRMZM2G161696	ID_1369	20	0	37.55	39.98	-5.14
GRMZM2G162755	ID_1374	20	0	46.34	52.46	-1.26
GRMZM2G164591	ID_1380	20	0	11.52	13.87	3.71
GRMZM2G164715	ID_1381	20	0	6.1	3.3	0.13
GRMZM2G165390	ID_1388	20	0	1.31	3.76	-1.87
GRMZM2G165919	ID_1391	20	0	39.05	21.41	0.58
GRMZM2G166906	ID_1395	20	0	11.44	22.63	1.25
GRMZM2G174860	ID_1421	20	0	2.71	1.45	0.57
GRMZM2G177050	ID_1430	20	0	16.21	14.61	-6.15
GRMZM2G177356	ID_1432	20	0	11.05	9.58	0.72
GRMZM2G178025	ID_1434	20	0	8.7	6.71	-2.22
GRMZM2G178645	ID_1436	20	0	3.47	6.53	-0.27
GRMZM2G178787	ID_1437	20	0	10.99	22.18	1.73
GRMZM2G178886	ID_1438	20	0	4.49	7.01	-3.22
GRMZM2G178887	ID_1439	20	0	7.33	8.37	0.89
GRMZM2G178892	ID_1440	20	0	17.37	26.88	0.66
GRMZM2G304700	ID_1457	20	0	78.44	103	7.66
GRMZM2G310368	ID_1463	20	0	12.52	25.08	-0.24
GRMZM2G319781	ID_1478	20	0	15.65	18.79	-1.49
GRMZM2G341058	ID_1520	20	0	1.83	4.59	-1.59
GRMZM2G361855	ID_1556	20	0	7.64	13.2	0.76
GRMZM2G366607	ID_1564	20	0	30.34	53.69	0.47
GRMZM2G373607	ID_1571	20	0	104.52	196.56	4.54
GRMZM2G374074	ID_1572	20	0	24.29	30.55	7.2
GRMZM2G375197	ID_1575	20	0	5	9.23	-1.94
GRMZM2G375487	ID_1576	20	0	1	1.28	0.32
GRMZM2G378547	ID_1581	20	0	0.87	1.77	-0.16
GRMZM2G380319	ID_1587	20	0	20.06	16.74	3.65
GRMZM2G385428	ID_1591	20	0	11.35	17.56	0.22
GRMZM2G388823	ID_1595	20	0	24.69	13.99	1.86
GRMZM2G404126	ID_1604	20	0	12.42	14.52	4.13
GRMZM2G405090	ID_1607	20	0	10.58	11.59	0.97
GRMZM2G418031	ID_1621	20	0	9.63	14.01	0.68
GRMZM2G425965	ID_1629	20	0	5.71	10.03	-0.49
GRMZM2G426922	ID_1630	20	0	77.66	99.61	7.56
GRMZM2G434541	ID_1641	20	0	20.34	30.39	-9.44
GRMZM2G438202	ID_1647	20	0	16.27	14.81	3.24
GRMZM2G443525	ID_1656	20	0	23.27	51.4	-7.39
GRMZM2G443785	ID_1658	20	0	2.72	3.36	-2.16
GRMZM2G445634	ID_1662	20	0	29.07	26.21	5.21
GRMZM2G449709	ID_1672	20	0	24.08	49.72	-3.47
GRMZM2G454056	ID_1678	20	0	12.93	9.5	4.34
GRMZM2G475293	ID_1704	20	0	44.12	86.09	-24.57
GRMZM2G476049	ID_1708	20	0	9.54	11.54	-0.01
GRMZM2G493395	ID_1719	20	0	29.53	45.22	4.51
GRMZM2G536768	ID_1726	20	0	6.98	8.58	1.53
GRMZM2G567452	ID_1734	20	0	166.72	180.17	61.38
GRMZM2G701058	ID_1741	20	0	24.76	39.29	3.1
GRMZM2G702229	ID_1743	20	0	18.9	31.8	2.8
GRMZM5G839794	ID_1771	20	0	18.6	24.8	-1.07
GRMZM5G842886	ID_1775	20	0	13.83	17.3	2.04
GRMZM5G852704	ID_1781	20	0	11.19	13.13	2.56
GRMZM5G888620	ID_1797	20	0	7.5	5.54	-0.96
GRMZM5G889052	ID_1798	20	0	6	7.1	0.44
GRMZM5G890438	ID_1800	20	0	3.54	2.05	-0.02
GRMZM5G891282	ID_0	14	0	7.93	49.56	-2.85
GRMZM5G886913	ID_1	14	0	7.14	20.37	3.9
GRMZM5G883632	ID_2	14	0	15.66	52.11	1.71
GRMZM5G838433	ID_19	14	0	5.68	23.02	5.85
GRMZM5G828488	ID_25	14	0	101.99	282.29	11.15
GRMZM2G478160	ID_39	14	0	55.52	126.5	7.17
GRMZM2G470075	ID_45	14	0	0.15	3.41	-0.4
GRMZM2G469224	ID_46	14	0	2.4	10.4	1.4
GRMZM2G456471	ID_51	14	0	2.31	8.37	-0.42
GRMZM2G430807	ID_63	14	0	-18.2	113.82	-63.44
GRMZM2G429955	ID_64	14	0	-50.97	595.15	-16.92
GRMZM2G423898	ID_73	14	0	481.74	2442.91	19.59
GRMZM2G389173	ID_101	14	0	0.21	1.51	-0.33
GRMZM2G387594	ID_103	14	0	1.53	10.31	-1.87
GRMZM2G374263	ID_110	14	0	-62.96	135.67	-67.62
GRMZM2G366065	ID_114	14	0	-1.41	11.55	-3.11
GRMZM2G361902	ID_116	14	0	0.81	4.1	-0.43
GRMZM2G360821	ID_119	14	0	-38.85	81.16	4.27
GRMZM2G355752	ID_125	14	0	1.94	35.12	-1.05
GRMZM2G345717	ID_128	14	0	1.52	15.22	-4.78
GRMZM2G320506	ID_139	14	0	0.59	3.16	0.33
GRMZM2G318408	ID_141	14	0	0.52	12.01	-1.64
GRMZM2G318220	ID_142	14	0	2.8	6.91	-0.09
GRMZM2G312736	ID_148	14	0	6.02	55.12	-0.27
GRMZM2G312732	ID_149	14	0	19.03	78.19	-3.88
GRMZM2G180559	ID_156	14	0	0.72	2.67	0
GRMZM2G179768	ID_158	14	0	1.45	8.22	-3.91
GRMZM2G177384	ID_161	14	0	5.48	13.07	1.15
GRMZM2G175995	ID_165	14	0	1.69	17.09	-6.05
GRMZM2G175728	ID_166	14	0	4.79	48.08	0.54
GRMZM2G175543	ID_167	14	0	-2.94	5.03	-2.39
GRMZM2G175076	ID_170	14	0	3.78	18.23	-3.73
GRMZM2G174585	ID_171	14	0	0.3	3.28	0.84
GRMZM2G171468	ID_176	14	0	-0.82	5.37	-0.51
GRMZM2G169329	ID_183	14	0	0.93	24.72	-3.69
GRMZM2G168898	ID_185	14	0	3.61	37.05	-7.06
GRMZM2G167336	ID_188	14	0	8.81	25.01	-4.43
GRMZM2G164341	ID_196	14	0	0.32	1.7	-0.77
GRMZM2G164074	ID_197	14	0	5.08	12.78	-0.44
GRMZM2G162737	ID_201	14	0	7.33	18.64	1.96
GRMZM2G162535	ID_204	14	0	7.67	27.38	3.31
GRMZM2G161728	ID_205	14	0	2.66	15.46	-1.74
GRMZM2G158342	ID_211	14	0	14.83	48.5	-0.16
GRMZM2G158175	ID_212	14	0	16.85	57.63	2.45
GRMZM2G154881	ID_222	14	0	-4.17	86.1	10.29
GRMZM2G154565	ID_225	14	0	1.3	3.53	-0.33
GRMZM2G154090	ID_227	14	0	17.97	42.76	5
GRMZM2G152135	ID_228	14	0	-8.17	53.71	-18.64
GRMZM2G150962	ID_229	14	0	0.74	1.9	0.04
GRMZM2G149317	ID_238	14	0	35.61	99.51	-23.12
GRMZM2G146616	ID_243	14	0	4.92	15.06	-1.69
GRMZM2G144730	ID_247	14	0	20.23	47.25	5.34
GRMZM2G138429	ID_259	14	0	5.71	20.39	1.86
GRMZM2G130959	ID_274	14	0	-0.44	16.8	-2.43
GRMZM2G129860	ID_276	14	0	56.92	404.51	8.27
GRMZM2G129453	ID_278	14	0	7.02	27.86	-0.04
GRMZM2G128078	ID_280	14	0	11.64	34.7	2.42
GRMZM2G125850	ID_283	14	0	474.81	1438.53	-11.44
GRMZM2G123309	ID_288	14	0	0.44	8.02	-1.51
GRMZM2G122437	ID_291	14	0	0.85	4.13	-0.66
GRMZM2G119214	ID_297	14	0	0.75	26.11	2.97
GRMZM2G118714	ID_301	14	0	-0.11	4.37	1.52
GRMZM2G117572	ID_305	14	0	-1.81	2.04	-0.53
GRMZM2G116517	ID_307	14	0	1.37	14.45	3.33
GRMZM2G116461	ID_308	14	0	23.13	87.24	3.01
GRMZM2G112377	ID_312	14	0	2.42	15.09	1.17
GRMZM2G108537	ID_316	14	0	2.1	5.91	0.35
GRMZM2G106213	ID_322	14	0	-2.13	3.14	0.1
GRMZM2G104549	ID_327	14	0	-972.9	2046.8	72.88
GRMZM2G103197	ID_328	14	0	1.91	56.31	3.72
GRMZM2G100158	ID_330	14	0	-2.73	25.5	-10.73
GRMZM2G099642	ID_332	14	0	1.22	4.68	-0.31
GRMZM2G099003	ID_334	14	0	3.6	22.54	-12.43
GRMZM2G093101	ID_339	14	0	10.85	29.76	1.19
GRMZM2G092752	ID_340	14	0	5.63	15.67	1.02
GRMZM2G085381	ID_351	14	0	131.75	577.33	28.52
GRMZM2G081536	ID_357	14	0	20.16	132.19	-1.73
GRMZM2G079807	ID_361	14	0	28.65	69.24	0.42
GRMZM2G073814	ID_370	14	0	1.25	9.29	0.8
GRMZM2G071705	ID_377	14	0	0.04	1.58	-0.54
GRMZM2G071688	ID_378	14	0	4.01	16.75	0.82
GRMZM2G071630	ID_379	14	0	2.56	7.73	0.06
GRMZM2G071100	ID_382	14	0	4.99	12.17	-0.73
GRMZM2G070508	ID_383	14	0	3.99	13.63	-2.92
GRMZM2G063723	ID_397	14	0	-1.48	3.11	-1.1
GRMZM2G062396	ID_399	14	0	1.8	9.03	-5.18
GRMZM2G060898	ID_402	14	0	0.11	1.12	-0.59
GRMZM2G056431	ID_407	14	0	-0.36	9.87	-1.47
GRMZM2G055704	ID_410	14	0	7.34	29.48	-8.22
GRMZM2G054032	ID_414	14	0	-0.14	2.89	0.34
GRMZM2G053707	ID_415	14	0	0.72	3.92	-0.35
GRMZM2G052720	ID_417	14	0	14.56	35.59	-4.97
GRMZM2G048549	ID_422	14	0	-0.98	8.02	-2.41
GRMZM2G041899	ID_435	14	0	4.2	12.13	0.44
GRMZM2G033846	ID_451	14	0	-4.75	100.4	-22.68
GRMZM2G028438	ID_459	14	0	0.62	3.37	0.57
GRMZM2G015908	ID_473	14	0	112.69	315.76	24.06
GRMZM2G013299	ID_485	14	0	14.35	63.53	2.36
GRMZM2G008714	ID_490	14	0	8.39	18.06	0.88
GRMZM2G008263	ID_492	14	0	165.01	380.72	-0.98
GRMZM2G008202	ID_493	14	0	2.84	17.63	1.43
AC217947.4_FG002	ID_507	14	0	4.14	25.75	1.83
AC216353.2_FG005	ID_509	14	0	-16644.2	42567.5	-2427.8
AC213521.3_FG005	ID_510	14	0	31.44	95.26	-7.13
AC191575.2_FG001	ID_525	14	0	34.46	76.99	1.46
AC199315.4_FG001	ID_540	14	0	-6.16	24.97	-12.63
AC204502.4_FG006	ID_548	14	0	11.16	40.39	0
AC209784.3_FG007	ID_561	14	0	0.4	1.16	-0.21
AC210168.4_FG003	ID_565	14	0	1.38	16.09	-0.02
AC212186.3_FG011	ID_571	14	0	0	14.12	0
AC225718.2_FG009	ID_577	14	0	7.43	27.34	-7.31
AC234160.1_FG003	ID_584	14	0	0.93	3.98	-0.13
GRMZM2G000489	ID_591	14	0	1.44	8.42	-3.12
GRMZM2G003970	ID_602	14	0	62.2	177.76	12.54
GRMZM2G004352	ID_605	14	0	2.59	10.27	-5.68
GRMZM2G007256	ID_620	14	0	25.09	53.82	2.89
GRMZM2G007399	ID_621	14	0	0.24	11.82	3.09
GRMZM2G007489	ID_622	14	0	-0.42	2.23	-0.66
GRMZM2G008247	ID_627	14	0	24.55	96.14	-55.9
GRMZM2G009223	ID_631	14	0	175.27	614.03	-13.87
GRMZM2G011141	ID_639	14	0	2.64	13.12	0.15
GRMZM2G012183	ID_646	14	0	2.91	6.5	-0.12
GRMZM2G013855	ID_650	14	0	0.51	6.38	0.4
GRMZM2G014672	ID_654	14	0	0.79	6.04	-0.57
GRMZM2G015226	ID_658	14	0	5.8	22.41	5.62
GRMZM2G015654	ID_660	14	0	5.08	18.2	1.34
GRMZM2G015692	ID_661	14	0	0.35	5.86	-0.34
GRMZM2G016241	ID_664	14	0	-2.44	13.26	-5.37
GRMZM2G016948	ID_670	14	0	1.31	8.07	1.33
GRMZM2G018579	ID_685	14	0	-8.38	23.76	-6.64
GRMZM2G018716	ID_686	14	0	0.55	2.31	0.07
GRMZM2G021794	ID_699	14	0	1.29	3.25	-0.17
GRMZM2G022686	ID_704	14	0	0.16	2.72	-0.1
GRMZM2G024680	ID_711	14	0	1.14	7.53	0.38
GRMZM2G026930	ID_722	14	0	0.66	11.17	-2.09
GRMZM2G027392	ID_724	14	0	92.44	332.72	-4.37
GRMZM2G027478	ID_725	14	0	-69.67	214.19	-154.14
GRMZM2G027695	ID_726	14	0	-5.57	28.69	-30.19
GRMZM2G031308	ID_735	14	0	41.01	97.67	1.83
GRMZM2G031311	ID_736	14	0	0.91	3.24	0.1
GRMZM2G031568	ID_738	14	0	1.58	21.75	-14.64
GRMZM2G032602	ID_742	14	0	0.3	1.87	0.09
GRMZM2G034417	ID_746	14	0	48.11	139.73	-12.78
GRMZM2G036286	ID_758	14	0	6.15	18.18	0.96
GRMZM2G036351	ID_759	14	0	18.07	71.55	2.58
GRMZM2G036826	ID_760	14	0	-0.29	1.95	-1.53
GRMZM2G036996	ID_762	14	0	8.63	33.42	8.92
GRMZM2G037255	ID_764	14	0	-0.41	0.86	-0.41
GRMZM2G041127	ID_779	14	0	5.37	59.05	-7.43
GRMZM2G042278	ID_784	14	0	3.4	7.96	0.64
GRMZM2G045287	ID_795	14	0	1.79	5.98	0.46
GRMZM2G045779	ID_797	14	0	0.93	3.7	0.14
GRMZM2G047626	ID_803	14	0	23.03	78.34	3.47
GRMZM2G047995	ID_805	14	0	93.28	211.07	8.4
GRMZM2G049541	ID_810	14	0	123.45	388.29	6.5
GRMZM2G050550	ID_819	14	0	0.58	2.06	0.25
GRMZM2G050561	ID_820	14	0	4.78	31.12	0.69
GRMZM2G050890	ID_821	14	0	2.66	12.76	0.11
GRMZM2G051256	ID_824	14	0	2.56	6.83	0.43
GRMZM2G051709	ID_825	14	0	20.31	51.29	3.76
GRMZM2G055420	ID_844	14	0	0.27	6.61	-0.27
GRMZM2G058227	ID_858	14	0	91.48	238.17	14.24
GRMZM2G059029	ID_862	14	0	1.42	4.05	-0.51
GRMZM2G059134	ID_864	14	0	4.84	16.65	-0.59
GRMZM2G060732	ID_868	14	0	36.29	109.63	5.83
GRMZM2G061963	ID_873	14	0	0.32	4.06	-0.03
GRMZM2G064042	ID_884	14	0	10.36	39.6	6.83
GRMZM2G064096	ID_885	14	0	91.61	649.54	-24.3
GRMZM2G065230	ID_891	14	0	0.12	4.63	-0.15
GRMZM2G066428	ID_896	14	0	0.22	2.54	0.44
GRMZM2G067063	ID_901	14	0	-0.31	4.2	0.75
GRMZM2G069203	ID_910	14	0	52.61	145.94	-42.53
GRMZM2G069694	ID_913	14	0	77.66	167.58	10.17
GRMZM2G070837	ID_915	14	0	1.13	17.53	0.1
GRMZM2G071021	ID_918	14	0	1.92	10.13	-4.62
GRMZM2G073548	ID_930	14	0	3.55	9.81	0.64
GRMZM2G074083	ID_932	14	0	-0.07	2.5	1.12
GRMZM2G074824	ID_938	14	0	0.03	5.05	1.06
GRMZM2G078024	ID_953	14	0	4.83	46.42	2.92
GRMZM2G078090	ID_954	14	0	0.03	1.67	-1.12
GRMZM2G078472	ID_959	14	0	-0.38	90.39	0.78
GRMZM2G078656	ID_960	14	0	19.59	50.5	6.54
GRMZM2G079682	ID_967	14	0	4.38	24.27	-0.46
GRMZM2G082149	ID_975	14	0	2.56	17.25	1.81
GRMZM2G082894	ID_981	14	0	5.13	18.91	0.21
GRMZM2G083195	ID_985	14	0	-0.86	2.6	-1.99
GRMZM2G083745	ID_990	14	0	3.51	11	1.86
GRMZM2G084570	ID_996	14	0	0.04	4.92	-3.09
GRMZM2G084859	ID_998	14	0	0.08	10.95	-7.98
GRMZM2G085320	ID_1002	14	0	-0.77	1.48	0.1
GRMZM2G087740	ID_1012	14	0	7.99	27.76	1.39
GRMZM2G089596	ID_1020	14	0	0.78	3.04	0.83
GRMZM2G089673	ID_1021	14	0	1.81	5.15	-0.18
GRMZM2G089698	ID_1023	14	0	-0.56	12.39	-1.95
GRMZM2G090172	ID_1027	14	0	13.7	39.02	0.3
GRMZM2G091597	ID_1038	14	0	-2.2	16.37	4.39
GRMZM2G092758	ID_1042	14	0	18.79	108.68	2.99
GRMZM2G096753	ID_1054	14	0	28.91	168.65	3.52
GRMZM2G098667	ID_1060	14	0	3.58	8.24	-0.63
GRMZM2G100176	ID_1065	14	0	1.82	13.35	0.19
GRMZM2G100454	ID_1068	14	0	46.65	107.52	3.93
GRMZM2G100714	ID_1070	14	0	1.2	3.06	-0.13
GRMZM2G102683	ID_1076	14	0	1.8	4.12	0.27
GRMZM2G103281	ID_1083	14	0	15.92	36.8	2.8
GRMZM2G103873	ID_1087	14	0	2.14	5.45	0.19
GRMZM2G105801	ID_1098	14	0	15.33	36.44	0.94
GRMZM2G106165	ID_1099	14	0	11.61	28.21	1.36
GRMZM2G106950	ID_1102	14	0	19.65	61.98	6.9
GRMZM2G108714	ID_1111	14	0	0.82	4.12	0.49
GRMZM2G108847	ID_1113	14	0	5.19	35.53	6.88
GRMZM2G109286	ID_1115	14	0	6.52	14.3	0.46
GRMZM2G109326	ID_1116	14	0	5.09	14.98	-0.24
GRMZM2G109388	ID_1117	14	0	-0.81	1.79	-0.23
GRMZM2G110511	ID_1125	14	0	0.22	1.48	-1.13
GRMZM2G110714	ID_1129	14	0	3.8	14.32	0.2
GRMZM2G112247	ID_1135	14	0	46.34	120.79	5.58
GRMZM2G113135	ID_1139	14	0	5.64	39.36	-4.66
GRMZM2G113682	ID_1144	14	0	-1.38	4.33	-2.22
GRMZM2G114578	ID_1147	14	0	9.06	24.04	0.37
GRMZM2G114801	ID_1149	14	0	29.32	67.5	3.31
GRMZM2G115357	ID_1151	14	0	8.48	21.66	-2.28
GRMZM2G115480	ID_1153	14	0	-0.6	12.54	-12.13
GRMZM2G115792	ID_1155	14	0	1.04	2.31	0
GRMZM2G116671	ID_1157	14	0	3.53	10.73	0.2
GRMZM2G117410	ID_1162	14	0	1.78	5.4	0.54
GRMZM2G118183	ID_1169	14	0	0.07	5.62	0.53
GRMZM2G118345	ID_1171	14	0	1.73	6	-2.4
GRMZM2G119300	ID_1174	14	0	4.5	77.98	-22.72
GRMZM2G122108	ID_1192	14	0	39.82	107.84	1.34
GRMZM2G122577	ID_1197	14	0	2.93	32.49	2.74
GRMZM2G122687	ID_1198	14	0	20.3	65.5	4.81
GRMZM2G125001	ID_1204	14	0	15.41	47.78	3.57
GRMZM2G125522	ID_1208	14	0	10.81	30.19	-0.73
GRMZM2G125704	ID_1212	14	0	8.57	20.23	0.63
GRMZM2G126199	ID_1215	14	0	0.12	5.22	0.1
GRMZM2G127350	ID_1219	14	0	0.63	6.13	0.2
GRMZM2G127490	ID_1221	14	0	0.75	3.81	-0.07
GRMZM2G128219	ID_1224	14	0	-5.51	30.27	-21.81
GRMZM2G128518	ID_1225	14	0	-1.86	19.14	-13.98
GRMZM2G129357	ID_1230	14	0	-0.96	4.73	-0.32
GRMZM2G129954	ID_1232	14	0	-2.71	19.55	6.28
GRMZM2G130149	ID_1233	14	0	12.59	108.44	-12.21
GRMZM2G132069	ID_1243	14	0	26.24	83.52	1.38
GRMZM2G132093	ID_1244	14	0	-7.75	13.9	2.68
GRMZM2G132704	ID_1248	14	0	1.32	3.09	0.14
GRMZM2G135722	ID_1257	14	0	-0.24	1.55	-0.53
GRMZM2G137407	ID_1265	14	0	0.19	3.65	0.05
GRMZM2G138067	ID_1270	14	0	0.22	24.31	-11.4
GRMZM2G138710	ID_1273	14	0	0.5	3.72	-0.31
GRMZM2G138756	ID_1274	14	0	3.14	12	0.29
GRMZM2G138809	ID_1275	14	0	0.83	12.62	-3.54
GRMZM2G142709	ID_1286	14	0	3.7	12.68	2.38
GRMZM2G146034	ID_1300	14	0	-0.15	1.4	0.21
GRMZM2G147544	ID_1305	14	0	18.42	60.29	5.57
GRMZM2G147862	ID_1307	14	0	1.45	5.93	-2.85
GRMZM2G149414	ID_1314	14	0	1.76	14.34	3.39
GRMZM2G150187	ID_1321	14	0	4.11	19.57	-0.11
GRMZM2G151227	ID_1323	14	0	14.36	40.23	-0.56
GRMZM2G153536	ID_1336	14	0	-0.04	5.4	0.39
GRMZM2G156150	ID_1349	14	0	8.39	27.96	1.81
GRMZM2G159500	ID_1361	14	0	10.76	35.74	-0.48
GRMZM2G160990	ID_1365	14	0	8.76	24.72	0.51
GRMZM2G161274	ID_1366	14	0	13.88	43.06	0.1
GRMZM2G161658	ID_1368	14	0	6.03	23.18	2.04
GRMZM2G162382	ID_1372	14	0	-1.41	2.71	-3.12
GRMZM2G164542	ID_1378	14	0	-0.28	1.82	-0.05
GRMZM2G164883	ID_1382	14	0	1.31	9.2	-0.22
GRMZM2G166976	ID_1396	14	0	49.2	215.92	0.89
GRMZM2G167594	ID_1397	14	0	12.75	45.1	-1.82
GRMZM2G169391	ID_1404	14	0	8.36	23.52	-1.05
GRMZM2G170552	ID_1407	14	0	0.11	3.82	0.1
GRMZM2G170692	ID_1409	14	0	4.78	17.8	0.53
GRMZM2G170982	ID_1410	14	0	-0.64	8.31	-4.85
GRMZM2G171423	ID_1412	14	0	159.68	398.55	25.76
GRMZM2G171569	ID_1414	14	0	38.8	115.61	-34.82
GRMZM2G172297	ID_1416	14	0	0.81	3.21	-0.11
GRMZM2G173882	ID_1419	14	0	20.96	54.69	-4.34
GRMZM2G173965	ID_1420	14	0	0.88	5.51	-0.13
GRMZM2G179005	ID_1441	14	0	-0.66	3.55	-1.08
GRMZM2G180283	ID_1446	14	0	4.04	10.78	-1.89
GRMZM2G304712	ID_1458	14	0	-18.72	48.15	-24.45
GRMZM2G311347	ID_1466	14	0	2.51	6.2	0.39
GRMZM2G314769	ID_1469	14	0	2.67	18.45	-3.31
GRMZM2G316778	ID_1473	14	0	1.3	4.54	0.06
GRMZM2G316789	ID_1474	14	0	2.57	18.58	0.32
GRMZM2G319057	ID_1477	14	0	14.71	42.03	-7.6
GRMZM2G320152	ID_1480	14	0	8.29	35.48	3.4
GRMZM2G323387	ID_1483	14	0	2.5	7.32	0.95
GRMZM2G324231	ID_1485	14	0	1.08	5.08	-0.62
GRMZM2G324903	ID_1488	14	0	6.11	18	1.11
GRMZM2G328438	ID_1499	14	0	0.81	4.21	0.58
GRMZM2G333183	ID_1508	14	0	4.49	19.54	1.13
GRMZM2G345622	ID_1527	14	0	1.3	9.11	2.28
GRMZM2G345991	ID_1529	14	0	2.26	6.24	-0.29
GRMZM2G355773	ID_1544	14	0	-8.96	46.28	6.44
GRMZM2G356128	ID_1545	14	0	1.66	10.73	0.37
GRMZM2G356714	ID_1546	14	0	0.62	3.57	-1.38
GRMZM2G358161	ID_1549	14	0	0.23	6	-0.25
GRMZM2G358931	ID_1551	14	0	6.24	18.23	1.45
GRMZM2G363554	ID_1559	14	0	53.21	152.79	10.13
GRMZM2G364208	ID_1560	14	0	1.59	40	-2.46
GRMZM2G365160	ID_1561	14	0	19.42	67.18	3.09
GRMZM2G368662	ID_1565	14	0	2.04	6.1	0.66
GRMZM2G378852	ID_1582	14	0	3.33	9.11	-3.22
GRMZM2G387394	ID_1593	14	0	1.28	6.52	-1.75
GRMZM2G408458	ID_1609	14	0	0.19	20.24	3.45
GRMZM2G413717	ID_1614	14	0	33.78	129.56	-6.93
GRMZM2G414007	ID_1616	14	0	0.7	2.62	0
GRMZM2G424112	ID_1625	14	0	-1.09	3.24	-0.77
GRMZM2G425728	ID_1628	14	0	1.39	25.93	-4.14
GRMZM2G432631	ID_1640	14	0	0.39	5.84	0.37
GRMZM2G436295	ID_1643	14	0	298.37	1280.48	28.59
GRMZM2G442387	ID_1654	14	0	0.96	2.46	0.29
GRMZM2G443668	ID_1657	14	0	57.72	136.68	-6.21
GRMZM2G446218	ID_1664	14	0	0.42	3.42	-0.55
GRMZM2G448344	ID_1668	14	0	-19.61	29.54	-12.51
GRMZM2G450498	ID_1675	14	0	5.21	26.35	-0.73
GRMZM2G455306	ID_1680	14	0	3.09	12.81	-0.92
GRMZM2G463640	ID_1690	14	0	-122.68	594.16	-96.54
GRMZM2G476477	ID_1709	14	0	0.34	3.81	0.58
GRMZM2G479045	ID_1711	14	0	5.51	15.92	-1.16
GRMZM2G479529	ID_1714	14	0	-0.35	6.8	-1.58
GRMZM2G502467	ID_1722	14	0	1.78	11.11	-0.72
GRMZM2G546097	ID_1728	14	0	-154.64	631.32	-27
GRMZM2G549568	ID_1729	14	0	9.99	40.32	-3.45
GRMZM2G560551	ID_1733	14	0	15.69	239.74	0
GRMZM2G700291	ID_1739	14	0	3.28	7.76	0.86
GRMZM5G803308	ID_1745	14	0	1.91	10.99	-0.97
GRMZM5G806784	ID_1751	14	0	-0.63	4.43	-0.36
GRMZM5G813055	ID_1753	14	0	1.62	8.45	-1.82
GRMZM5G823004	ID_1759	14	0	5.24	13.72	0.96
GRMZM5G827496	ID_1762	14	0	1.31	8.86	-2.27
GRMZM5G828312	ID_1763	14	0	20.83	54.13	1.33
GRMZM5G829946	ID_1765	14	0	79.12	200.14	14.08
GRMZM5G841343	ID_1773	14	0	5.1	12.47	1.07
GRMZM5G854625	ID_1782	14	0	0.51	10.25	4.84
GRMZM5G854731	ID_1783	14	0	0.2	5.18	-2.68
GRMZM5G877647	ID_1791	14	0	-0.09	9.08	2.36
GRMZM5G891967	ID_1802	14	0	1.02	4.83	-0.57
GRMZM5G897776	ID_1808	14	0	84.7	262.29	-30.07
GRMZM2G478553	ID_38	23	0	3.63	6.33	1.18
GRMZM2G427054	ID_68	23	0	7.35	14.79	3.22
GRMZM2G425072	ID_71	23	0	0.66	1.59	0.85
GRMZM2G400714	ID_87	23	0	20.14	45.7	10.59
GRMZM2G326707	ID_136	23	0	91.74	140.31	35.89
GRMZM2G176307	ID_162	23	0	0.54	2.57	1.41
GRMZM2G176085	ID_164	23	0	6.11	12.27	6.19
GRMZM2G171752	ID_175	23	0	26.56	34.91	18.15
GRMZM2G137864	ID_260	23	0	19.1	42.05	9.37
GRMZM2G134476	ID_267	23	0	3.73	11.27	3.21
GRMZM2G126062	ID_282	23	0	10.49	20.24	3.55
GRMZM2G117796	ID_304	23	0	1.52	2.25	1.17
GRMZM2G088819	ID_346	23	0	15.79	23.69	8.14
GRMZM2G076526	ID_368	23	0	6.82	13.3	2.28
GRMZM2G065989	ID_391	23	0	679.36	1513.17	171.39
GRMZM2G065928	ID_392	23	0	7.11	12.49	3.91
GRMZM2G049915	ID_418	23	0	83.54	187.4	21.27
GRMZM2G038964	ID_441	23	0	12.54	26.41	2.24
GRMZM2G037015	ID_444	23	0	8.04	17.37	4.85
GRMZM2G035557	ID_446	23	0	80.8	180.53	81.25
GRMZM2G035103	ID_447	23	0	12.08	21.65	5.81
GRMZM2G027198	ID_462	23	0	8.38	15.21	7.06
GRMZM2G014193	ID_479	23	0	7.61	11.15	5.44
GRMZM2G008696	ID_628	23	0	6.63	15.43	4.28
GRMZM2G010871	ID_637	23	0	25.21	42.25	9.39
GRMZM2G010944	ID_638	23	0	1.72	3.15	1.37
GRMZM2G020054	ID_693	23	0	7	11.6	3.83
GRMZM2G020150	ID_695	23	0	9.83	20.66	3.48
GRMZM2G021605	ID_698	23	0	6.39	13.7	1.42
GRMZM2G023711	ID_706	23	0	31.08	92.2	36.99
GRMZM2G035579	ID_751	23	0	169.3	363.05	38.95
GRMZM2G044629	ID_789	23	0	8.75	18.1	3.01
GRMZM2G050080	ID_814	23	0	1.03	4.77	1.9
GRMZM2G053921	ID_836	23	0	6.28	11.53	4.39
GRMZM2G059517	ID_865	23	0	1.83	4.52	0.88
GRMZM2G062218	ID_875	23	0	3.64	5.4	1.56
GRMZM2G062777	ID_880	23	0	3.99	12.55	4.07
GRMZM2G063001	ID_881	23	0	8.23	17.71	3.62
GRMZM2G069146	ID_909	23	0	6.69	7.98	4.29
GRMZM2G072518	ID_926	23	0	13.68	32.72	16.79
GRMZM2G079127	ID_963	23	0	0.97	2.82	0.73
GRMZM2G083655	ID_989	23	0	72.74	127.35	28.28
GRMZM2G087662	ID_1010	23	0	6.42	10.71	2.45
GRMZM2G090105	ID_1026	23	0	11.41	16.13	8.79
GRMZM2G091331	ID_1033	23	0	3.96	14.37	6.12
GRMZM2G102238	ID_1074	23	0	37.5	84.09	9.4
GRMZM2G103546	ID_1084	23	0	10.91	26.83	4.75
GRMZM2G104012	ID_1088	23	0	7.21	10.65	4.49
GRMZM2G106792	ID_1101	23	0	31.95	54.23	22.04
GRMZM2G111987	ID_1134	23	0	9.44	21.88	3.57
GRMZM2G117240	ID_1160	23	0	1.43	4.93	3.24
GRMZM2G117823	ID_1166	23	0	5.42	12.38	4.11
GRMZM2G120539	ID_1181	23	0	4.09	7.38	3.42
GRMZM2G121948	ID_1191	23	0	28.76	59.8	8.65
GRMZM2G126582	ID_1216	23	0	2.42	3.84	2.34
GRMZM2G132095	ID_1245	23	0	8.39	19.71	3.14
GRMZM2G135091	ID_1255	23	0	10.04	24.18	4.66
GRMZM2G135586	ID_1256	23	0	112.49	209.59	30.75
GRMZM2G144034	ID_1291	23	0	39.33	74.1	10.58
GRMZM2G144197	ID_1292	23	0	2.58	4	1.08
GRMZM2G149935	ID_1319	23	0	0.77	1.39	0.54
GRMZM2G152447	ID_1330	23	0	423.99	689.37	157.53
GRMZM2G165488	ID_1389	23	0	2.13	5.35	0.82
GRMZM2G168190	ID_1399	23	0	2.76	6.41	1.16
GRMZM2G169064	ID_1403	23	0	30	62.53	10
GRMZM2G169562	ID_1406	23	0	7.71	13.91	2.13
GRMZM2G176029	ID_1427	23	0	7.36	9.82	6.84
GRMZM2G176780	ID_1429	23	0	1.64	4.72	1.72
GRMZM2G177203	ID_1431	23	0	24.74	51.04	10.25
GRMZM2G179685	ID_1444	23	0	1.09	2.73	0.71
GRMZM2G326734	ID_1495	23	0	20.84	42.34	4.98
GRMZM2G332225	ID_1505	23	0	1.21	4.02	1.86
GRMZM2G339091	ID_1517	23	0	45.3	114.89	26.62
GRMZM2G355572	ID_1543	23	0	22.7	34.48	14.14
GRMZM2G357631	ID_1548	23	0	21.53	28.53	10.99
GRMZM2G362413	ID_1557	23	0	4.28	8.87	1.99
GRMZM2G374302	ID_1573	23	0	27.13	105.44	42.91
GRMZM2G379540	ID_1584	23	0	7.64	15.06	4.64
GRMZM2G404603	ID_1606	23	0	11.37	24.78	5.43
GRMZM2G425004	ID_1627	23	0	12.44	23.14	3.27
GRMZM2G431714	ID_1639	23	0	2.5	6.82	1.49
GRMZM2G471089	ID_1695	23	0	1.71	5.2	2.26
GRMZM2G475536	ID_1706	23	0	130.06	306.85	39.27
GRMZM5G805732	ID_1749	23	0	2.62	5.19	1.98
GRMZM5G898668	ID_1809	23	0	7.91	16.35	2.1
GRMZM5G848182	ID_14	2	0	-29.18	-35.81	-18.38
GRMZM2G391596	ID_98	2	0	-17.34	-30.79	-21.4
GRMZM2G357834	ID_122	2	0	-24.6	-55.7	-19.56
GRMZM2G348452	ID_127	2	0	-33.68	-71.44	-39.38
GRMZM2G344163	ID_130	2	0	-5.89	-10.5	-6.39
GRMZM2G162688	ID_202	2	0	-3.73	-8.58	-2.28
GRMZM2G150791	ID_231	2	0	-29.41	-36.47	-15.83
GRMZM2G150004	ID_233	2	0	-0.76	-2.75	-0.91
GRMZM2G140994	ID_251	2	0	-1.23	-1.79	-0.75
GRMZM2G119941	ID_293	2	0	-2.16	-4.97	-2.51
GRMZM2G114588	ID_310	2	0	-20.44	-117.51	-60.91
GRMZM2G111208	ID_314	2	0	-14.78	-24.26	-11.47
GRMZM2G105400	ID_325	2	0	-1.48	-5.29	-2.43
GRMZM2G097641	ID_335	2	0	-4.33	-4.99	-2.86
GRMZM2G094353	ID_337	2	0	-21.57	-32.22	-9.49
GRMZM2G081843	ID_355	2	0	-18.94	-29.22	-17.42
GRMZM2G074267	ID_369	2	0	-0.28	-2.27	-1.13
GRMZM2G066870	ID_390	2	0	-68.78	-87.98	-32.81
GRMZM2G003682	ID_497	2	0	-0.66	-2.08	-1.15
GRMZM2G000353	ID_501	2	0	-10.65	-27.61	-5.84
AC149810.2_FG004	ID_519	2	0	-30.19	-40.45	-16.66
AC199198.3_FG003	ID_539	2	0	-5.44	-15.01	-10.03
AC234520.1_FG003	ID_587	2	0	-12.7	-25.03	-18.19
GRMZM2G002104	ID_596	2	0	-4.57	-6.48	-4.28
GRMZM2G010731	ID_634	2	0	-35.08	-52.17	-39.53
GRMZM2G017186	ID_671	2	0	-1.6	-5.29	-2.82
GRMZM2G017229	ID_672	2	0	-48.64	-81.24	-29.99
GRMZM2G018074	ID_681	2	0	-17.96	-26.66	-13.26
GRMZM2G027972	ID_727	2	0	-2.14	-2.9	-1.05
GRMZM2G035222	ID_748	2	0	-13.08	-21.41	-10.16
GRMZM2G035805	ID_754	2	0	-14.09	-17.39	-9.81
GRMZM2G037265	ID_765	2	0	-20.57	-32.03	-11.06
GRMZM2G039988	ID_773	2	0	-52.79	-88.38	-50.54
GRMZM2G050177	ID_816	2	0	-8.04	-12.44	-2.96
GRMZM2G052658	ID_828	2	0	-8.12	-11.11	-6.64
GRMZM2G056495	ID_850	2	0	-5.33	-9.68	-1.66
GRMZM2G056505	ID_852	2	0	-11.73	-14.1	-7.66
GRMZM2G062129	ID_874	2	0	-50.24	-62.87	-38.44
GRMZM2G074395	ID_935	2	0	-0.78	-2.62	-1.41
GRMZM2G075438	ID_940	2	0	-12.7	-22.65	-15.69
GRMZM2G083504	ID_988	2	0	-17.23	-20.08	-9.5
GRMZM2G089836	ID_1025	2	0	-37.01	-66.7	-43.79
GRMZM2G103152	ID_1080	2	0	-1.92	-4.07	-1.15
GRMZM2G108480	ID_1109	2	0	-115.12	-148.87	-81.56
GRMZM2G111975	ID_1133	2	0	-5.92	-10.21	-4.3
GRMZM2G116966	ID_1159	2	0	-29.88	-84.64	-47.81
GRMZM2G121293	ID_1186	2	0	-17.17	-27.12	-12.26
GRMZM2G122805	ID_1199	2	0	-2.51	-5.03	-1.89
GRMZM2G125853	ID_1213	2	0	-55.1	-72	-47.78
GRMZM2G126772	ID_1217	2	0	-11.33	-15.45	-10.1
GRMZM2G127714	ID_1222	2	0	-1.11	-1.67	-1.1
GRMZM2G132547	ID_1246	2	0	-15.58	-20.13	-11.14
GRMZM2G141353	ID_1283	2	0	-52.14	-59.04	-29.53
GRMZM2G154789	ID_1345	2	0	-38.35	-82.89	-7.48
GRMZM2G157269	ID_1354	2	0	-11.5	-19.34	-8.55
GRMZM2G164413	ID_1377	2	0	-5.73	-6.43	-3.5
GRMZM2G330049	ID_1503	2	0	-3.85	-17.96	-6.43
GRMZM2G343048	ID_1524	2	0	-3.42	-5.69	-4.31
GRMZM2G379002	ID_1583	2	0	-4.12	-5.22	-3.25
GRMZM2G429035	ID_1633	2	0	-6.52	-9.39	-3.37
GRMZM2G437100	ID_1645	2	0	-0.72	-1.07	-0.35
GRMZM2G440208	ID_1651	2	0	-4.76	-8.96	-3.52
GRMZM2G445616	ID_1661	2	0	-77.98	-102.94	-61.15
GRMZM2G477491	ID_1710	2	0	-1.73	-2.88	-1.05
GRMZM5G817759	ID_1756	2	0	-11.63	-15.44	-10.14
GRMZM5G872399	ID_1787	2	0	-2.01	-3.92	-1.42
GRMZM5G879665	ID_1796	2	0	-14.52	-17.48	-7.9
GRMZM2G341404	ID_133	25	0	0.61	2.05	2.4
GRMZM2G134668	ID_266	25	0	5.12	12.18	20.32
GRMZM2G049536	ID_419	25	0	0.41	0.76	1.29
GRMZM2G035063	ID_448	25	0	0.4	1.18	2
GRMZM2G018375	ID_684	25	0	282.83	576.46	977.21
GRMZM2G130728	ID_1235	25	0	0.81	2.34	2.85
GRMZM2G138589	ID_1272	25	0	4.09	6.7	9.46
GRMZM2G449681	ID_1671	25	0	9.97	13.66	20.28
GRMZM2G563190	ID_34	24	0	1.86	4.08	3.05
GRMZM2G141931	ID_250	24	0	8.31	16.96	13.97
GRMZM2G005419	ID_611	24	0	2.75	3.92	4.27
GRMZM2G022402	ID_702	24	0	3	7.95	7.36
GRMZM2G099454	ID_1063	24	0	6.11	15.55	14.5
GRMZM2G114793	ID_1148	24	0	5.26	11.4	8.42
GRMZM2G158304	ID_1357	24	0	2.73	8.56	6.75
GRMZM2G324886	ID_1487	24	0	1.03	1.47	1.63
GRMZM5G800586	ID_31	22	0	2.37	2.55	3.68
GRMZM2G144956	ID_246	22	0	5.77	4.33	12.47
GRMZM2G133400	ID_272	22	0	8.14	9.6	20.75
GRMZM2G117971	ID_303	22	0	4.32	3.01	10.67
GRMZM2G028535	ID_458	22	0	1.62	1.14	4.63
GRMZM2G044720	ID_790	22	0	1.53	1.08	3.89
GRMZM2G046155	ID_798	22	0	3.22	0.86	6.51
GRMZM2G059129	ID_863	22	0	2.47	1.05	4.51
GRMZM2G071790	ID_922	22	0	0.65	0.7	1.3
GRMZM2G072383	ID_925	22	0	73.56	63.93	137.69
GRMZM2G091481	ID_1036	22	0	19.75	23.3	74.38
GRMZM2G105330	ID_1094	22	0	0.83	0.75	1.15
GRMZM2G122251	ID_1194	22	0	2.79	1.95	5.18
GRMZM2G134264	ID_1253	22	0	77.1	45.16	112.89
GRMZM2G419166	ID_1622	22	0	0.62	0.77	1.56
GRMZM2G034471	ID_449	21	0	147.22	155.89	193.4
GRMZM2G019443	ID_470	21	0	5.67	5.74	5.11
GRMZM2G028570	ID_728	21	0	6.42	6.28	3.44
GRMZM2G101290	ID_1072	21	0	2.12	2.13	1.41
GRMZM2G148561	ID_1308	21	0	5.59	3.34	2.84
GRMZM2G170625	ID_1408	21	0	6.88	3.72	5.54
GRMZM5G825515	ID_1761	21	0	9.78	6.4	7.08
GRMZM5G849243	ID_12	19	0	4.35	-1.03	8
GRMZM2G467338	ID_47	19	0	3.98	-3.94	3.32
GRMZM2G453805	ID_53	19	0	13.38	-12.53	16.1
GRMZM2G400725	ID_86	19	0	1.07	0	0.57
GRMZM2G379005	ID_108	19	0	1.47	0.39	1.11
GRMZM2G343974	ID_131	19	0	2.42	-1.13	1.3
GRMZM2G337242	ID_134	19	0	3.68	-3.81	4.18
GRMZM2G168985	ID_184	19	0	1.34	-0.79	3.21
GRMZM2G165530	ID_192	19	0	1.36	-0.82	1.16
GRMZM2G142345	ID_249	19	0	9.01	1.68	5.66
GRMZM2G106588	ID_321	19	0	5.12	0.35	7.56
GRMZM2G062531	ID_398	19	0	8.71	2.22	14
GRMZM2G015542	ID_474	19	0	2.22	-0.77	3.88
AC197013.3_FG003	ID_516	19	0	16.76	-1.23	11.27
AC210169.3_FG002	ID_566	19	0	0.91	-0.31	0.6
GRMZM2G006293	ID_614	19	0	4.27	-0.77	1.95
GRMZM2G011169	ID_640	19	0	1.94	-0.71	0.82
GRMZM2G058970	ID_861	19	0	1.27	-0.61	1.69
GRMZM2G089163	ID_1017	19	0	1.88	0.33	1.05
GRMZM2G089574	ID_1019	19	0	15.9	7.8	13.59
GRMZM2G104504	ID_1091	19	0	4.49	-4.63	3.85
GRMZM2G111017	ID_1131	19	0	4.09	-2.21	2.62
GRMZM2G118433	ID_1172	19	0	1.63	-1.02	3.12
GRMZM2G118637	ID_1173	19	0	182.69	-57.6	145.73
GRMZM2G131026	ID_1237	19	0	4.68	1.84	3.58
GRMZM2G136580	ID_1260	19	0	5.23	2.11	4.05
GRMZM2G175150	ID_1423	19	0	9.59	0.43	5.73
GRMZM2G177726	ID_1433	19	0	17.78	1.45	15.89
GRMZM2G178254	ID_1435	19	0	10.53	-0.38	11.55
GRMZM2G342246	ID_1521	19	0	3.45	-0.16	2.27
GRMZM2G349791	ID_1537	19	0	39.08	9.42	26.1
GRMZM2G358618	ID_1550	19	0	2.66	-3.55	6.4
GRMZM2G380777	ID_1588	19	0	0.45	-0.44	0.71
GRMZM2G468111	ID_1693	19	0	1.22	0.6	1.23
GRMZM2G473385	ID_1698	19	0	1.25	0.1	0.69
GRMZM2G551565	ID_1730	19	0	6	-2.21	2.55
GRMZM2G553532	ID_1731	19	0	1.35	-0.33	0.94
GRMZM5G814271	ID_1755	19	0	38.77	-8.09	38.43
GRMZM5G873335	ID_1789	19	0	11.38	1.98	8.57
GRMZM5G852396	ID_10	18	0	14.9	-1.06	-2.27
GRMZM5G852325	ID_11	18	0	189.39	-13.57	1.75
GRMZM5G848550	ID_13	18	0	152.99	6.16	10.73
GRMZM5G848138	ID_15	18	0	33.28	-0.99	9.4
GRMZM5G843972	ID_17	18	0	27.7	-1.55	-3.71
GRMZM5G835677	ID_21	18	0	28.51	-0.13	-0.41
GRMZM2G464572	ID_50	18	0	33.56	9.58	-1.31
GRMZM2G455124	ID_52	18	0	1.26	-0.6	-0.41
GRMZM2G442129	ID_60	18	0	1.69	0.04	-0.47
GRMZM2G437487	ID_61	18	0	3.48	0	0
GRMZM2G426140	ID_69	18	0	1.15	-0.5	-0.47
GRMZM2G415793	ID_80	18	0	4.49	2.25	1.31
GRMZM2G395728	ID_92	18	0	3.63	-0.43	0.54
GRMZM2G381709	ID_106	18	0	34.02	10.29	-1.2
GRMZM2G370081	ID_113	18	0	1.55	0.11	-0.22
GRMZM2G361633	ID_117	18	0	3.76	-0.23	-0.1
GRMZM2G357399	ID_123	18	0	13.49	-0.39	3.32
GRMZM2G316256	ID_144	18	0	28.16	-1.09	0.67
GRMZM2G303964	ID_154	18	0	5.14	1.74	-0.03
GRMZM2G137329	ID_263	18	0	217.81	12.56	-71.48
GRMZM2G123212	ID_289	18	0	1.71	0.41	0.85
GRMZM2G122479	ID_290	18	0	24.66	0.15	4.45
GRMZM2G105518	ID_324	18	0	22.35	0	0.31
GRMZM2G102959	ID_329	18	0	5.37	-4.27	-4.08
GRMZM2G099984	ID_331	18	0	22.61	0	0
GRMZM2G080767	ID_359	18	0	6.89	1.39	2.37
GRMZM2G073275	ID_371	18	0	120.26	-5.61	-7.22
GRMZM2G072855	ID_373	18	0	74.71	-19.79	-14.88
GRMZM2G072653	ID_375	18	0	3.3	0.43	0.15
GRMZM2G062042	ID_401	18	0	126.6	-60.66	10.55
GRMZM2G058573	ID_405	18	0	6.32	-0.77	-0.6
GRMZM2G047409	ID_424	18	0	15.28	-0.28	-0.01
GRMZM2G046601	ID_425	18	0	5.45	0.65	-0.09
GRMZM2G043109	ID_430	18	0	216.98	21.24	8.83
GRMZM2G042034	ID_433	18	0	40.67	0.01	-0.33
GRMZM2G041368	ID_436	18	0	4.92	0	0
GRMZM2G039968	ID_439	18	0	5.86	-0.52	-0.13
GRMZM2G036455	ID_445	18	0	66.97	19.59	8.82
GRMZM2G025231	ID_465	18	0	13.94	2.83	1.63
GRMZM2G018241	ID_471	18	0	2.17	0.45	0.02
GRMZM2G015355	ID_475	18	0	213.22	2.23	-1.25
GRMZM2G013724	ID_481	18	0	5.81	0	0
GRMZM2G009479	ID_487	18	0	7.37	-1.71	0.89
GRMZM2G008642	ID_491	18	0	10.42	3.77	0.62
AC233899.1_FG005	ID_504	18	0	10.17	2.44	0.76
AC210598.3_FG003	ID_511	18	0	1.11	-0.69	-0.17
AC196066.3_FG003	ID_517	18	0	7.56	0.02	0.92
AC194965.4_FG004	ID_518	18	0	11.23	-6.96	-4.3
AC149828.2_FG004	ID_520	18	0	23.93	8.19	-0.98
AC194341.4_FG002	ID_526	18	0	57.65	-3.48	-1.4
AC195174.2_FG007	ID_527	18	0	48.2	-2.14	-2.14
AC196156.3_FG003	ID_530	18	0	79.93	0	0.95
AC197047.3_FG001	ID_533	18	0	7.28	3.38	2.53
AC197387.3_FG004	ID_534	18	0	14.57	-0.65	0.6
AC199705.3_FG008	ID_542	18	0	18.4	0	0.6
AC202129.3_FG001	ID_544	18	0	204.17	2.26	-19.45
AC202435.3_FG003	ID_545	18	0	10.7	0.15	0.19
AC205122.4_FG003	ID_552	18	0	80.37	-3.41	-0.18
AC210595.3_FG004	ID_567	18	0	18.71	0	0.62
AC215260.3_FG003	ID_574	18	0	4.98	-0.6	-1.6
AC225363.3_FG004	ID_576	18	0	7.47	0.78	-1.09
AC233914.1_FG001	ID_580	18	0	54.62	-6.52	16.06
AC234161.1_FG010	ID_585	18	0	70.34	-5.51	-11.43
GRMZM2G004909	ID_610	18	0	40.41	-1.1	4.63
GRMZM2G007053	ID_619	18	0	4.86	1.24	1.09
GRMZM2G008751	ID_629	18	0	28.15	-11.15	-9.37
GRMZM2G010768	ID_635	18	0	24.27	-1.85	-1.54
GRMZM2G010868	ID_636	18	0	116.84	-6.25	-44.36
GRMZM2G011240	ID_641	18	0	6.31	-0.93	0.46
GRMZM2G012269	ID_647	18	0	10.38	0.15	-0.31
GRMZM2G014558	ID_653	18	0	3.09	0	0
GRMZM2G017557	ID_678	18	0	3.13	0.07	0.12
GRMZM2G017966	ID_679	18	0	34.25	-0.66	-0.41
GRMZM2G027001	ID_723	18	0	12.37	0	0.4
GRMZM2G030713	ID_732	18	0	2.33	1.06	0.15
GRMZM2G031102	ID_733	18	0	3.71	-1.46	-1.25
GRMZM2G033199	ID_743	18	0	4.58	0	0
GRMZM2G035853	ID_755	18	0	22.1	-2.37	9.44
GRMZM2G036991	ID_761	18	0	8.7	-0.2	1.9
GRMZM2G039610	ID_769	18	0	2.32	-0.34	0.07
GRMZM2G039723	ID_770	18	0	51.07	6.24	-4.09
GRMZM2G044788	ID_791	18	0	9.82	4.71	2.39
GRMZM2G046468	ID_800	18	0	1.77	0.11	0.81
GRMZM2G049913	ID_813	18	0	2.54	-1.76	-1.7
GRMZM2G050481	ID_818	18	0	5.4	-4.05	-2.64
GRMZM2G053692	ID_835	18	0	4.28	-1.18	-0.28
GRMZM2G056500	ID_851	18	0	52.59	3.29	15.53
GRMZM2G056934	ID_853	18	0	17.7	0.06	0.01
GRMZM2G061487	ID_872	18	0	25.77	9.79	14.57
GRMZM2G062458	ID_876	18	0	12.75	0.02	-0.4
GRMZM2G066716	ID_899	18	0	6.35	0	0
GRMZM2G069141	ID_908	18	0	7.5	-0.2	-0.01
GRMZM2G069905	ID_914	18	0	1.67	0.37	-0.15
GRMZM2G070931	ID_917	18	0	16.43	-0.92	-1.78
GRMZM2G071217	ID_919	18	0	9	-0.97	-0.31
GRMZM2G071343	ID_920	18	0	14.71	-4.82	-0.92
GRMZM2G072916	ID_928	18	0	4.59	0	0.39
GRMZM2G073969	ID_931	18	0	32.12	8.11	13.99
GRMZM2G076114	ID_941	18	0	3.8	-0.25	-0.25
GRMZM2G079477	ID_964	18	0	2.12	-0.33	0.14
GRMZM2G082184	ID_976	18	0	9.13	2.95	-0.89
GRMZM2G085711	ID_1005	18	0	2.22	0	0
GRMZM2G097457	ID_1057	18	0	34.99	-10.57	-6.39
GRMZM2G099867	ID_1064	18	0	3.59	-1.45	-1.46
GRMZM2G105319	ID_1093	18	0	4.06	-0.09	-0.09
GRMZM2G107031	ID_1103	18	0	7.12	2.5	-0.36
GRMZM2G107096	ID_1104	18	0	1.27	0.52	0.43
GRMZM2G114398	ID_1146	18	0	33.66	-13.81	10.24
GRMZM2G119511	ID_1176	18	0	4.2	-1.38	-0.89
GRMZM2G124948	ID_1203	18	0	2.18	-1.11	-0.45
GRMZM2G129482	ID_1231	18	0	61.3	-18.86	-22.37
GRMZM2G130953	ID_1236	18	0	7.53	0.13	1.29
GRMZM2G136857	ID_1261	18	0	169.16	-123.89	5.75
GRMZM2G143780	ID_1289	18	0	340.67	-14.25	-23.71
GRMZM2G143998	ID_1290	18	0	1.26	0.17	-0.14
GRMZM2G146623	ID_1302	18	0	25.29	-0.09	0.16
GRMZM2G153799	ID_1337	18	0	4.44	-4.54	-1.14
GRMZM2G160541	ID_1364	18	0	4.26	1.04	-0.15
GRMZM2G162845	ID_1375	18	0	7.72	-1.77	-2.06
GRMZM2G175265	ID_1424	18	0	60.68	-19.8	-25.91
GRMZM2G180422	ID_1447	18	0	2.27	0.25	0.8
GRMZM2G180478	ID_1448	18	0	4.5	-1.27	1.72
GRMZM2G181000	ID_1449	18	0	2.34	0.31	0.81
GRMZM2G181153	ID_1451	18	0	39.38	2.12	1.8
GRMZM2G301485	ID_1452	18	0	2.46	-0.19	-0.27
GRMZM2G301932	ID_1453	18	0	2.61	0.16	0
GRMZM2G304840	ID_1459	18	0	2.46	0	0
GRMZM2G306919	ID_1461	18	0	1.64	-0.72	-0.55
GRMZM2G307892	ID_1462	18	0	11.1	-0.95	-0.23
GRMZM2G315088	ID_1470	18	0	6.29	-0.64	-0.49
GRMZM2G321750	ID_1481	18	0	7.12	-0.27	0.5
GRMZM2G323470	ID_1484	18	0	10.43	-0.34	0.34
GRMZM2G325938	ID_1491	18	0	5	0.01	-0.02
GRMZM2G329454	ID_1502	18	0	20.38	0.13	4.42
GRMZM2G330302	ID_1504	18	0	2.85	-0.31	0.7
GRMZM2G332838	ID_1507	18	0	455.67	-51.64	-50.23
GRMZM2G336839	ID_1512	18	0	16.57	0.23	-0.28
GRMZM2G359786	ID_1552	18	0	8.49	-3.98	-3.01
GRMZM2G363116	ID_1558	18	0	9.31	2.16	-2.04
GRMZM2G376905	ID_1579	18	0	18.85	0.02	0.14
GRMZM2G376957	ID_1580	18	0	9.94	0.23	-0.02
GRMZM2G402368	ID_1601	18	0	6.56	-0.2	0.53
GRMZM2G413460	ID_1613	18	0	2.34	-0.08	0.5
GRMZM2G413943	ID_1615	18	0	2.51	-2.44	-1.7
GRMZM2G447984	ID_1666	18	0	58.35	0.21	-0.18
GRMZM2G453320	ID_1677	18	0	1.8	-1.55	-0.39
GRMZM2G455440	ID_1681	18	0	7.03	0.6	0.23
GRMZM2G458118	ID_1689	18	0	3.03	-1.99	-1.83
GRMZM2G474229	ID_1700	18	0	1.78	0	0
GRMZM2G479760	ID_1715	18	0	2.93	-1.92	-1.27
GRMZM2G487318	ID_1717	18	0	5.07	0	0.43
GRMZM2G488101	ID_1718	18	0	5.28	-2.18	-1.49
GRMZM2G499197	ID_1721	18	0	11.9	-1.5	-0.46
GRMZM2G583751	ID_1736	18	0	1.81	0.22	0
GRMZM2G700046	ID_1738	18	0	6.81	-0.13	-0.13
GRMZM5G806774	ID_1750	18	0	211.04	-212.31	-97.35
GRMZM5G842219	ID_1774	18	0	8.08	-2.2	0.99
GRMZM5G846097	ID_1777	18	0	41.49	-14.63	-14.63
GRMZM5G896114	ID_1807	18	0	4.13	1.81	-0.03
GRMZM5G840703	ID_18	17	0	1201.94	-288.77	-798.88
GRMZM2G396248	ID_91	17	0	0.8	0.1	-0.84
GRMZM2G314520	ID_146	17	0	10.14	-9.29	-18.96
GRMZM2G127546	ID_281	17	0	2.72	0.07	-1.38
GRMZM2G106945	ID_319	17	0	20.27	6.84	-7.95
GRMZM2G014454	ID_477	17	0	3.53	-0.01	-4.63
AC233888.1_FG002	ID_505	17	0	17.38	-3.71	-14.51
AC196475.3_FG004	ID_532	17	0	26.06	-1.69	-23.98
AC209636.2_FG003	ID_560	17	0	4.08	0.33	-1.82
AC215260.3_FG001	ID_573	17	0	13.15	1.76	-6.44
GRMZM2G004060	ID_603	17	0	3.35	0.86	-7.09
GRMZM2G006480	ID_617	17	0	3.56	-1.17	-3.66
GRMZM2G035268	ID_749	17	0	23.67	0.72	-17.26
GRMZM2G035790	ID_753	17	0	13.49	4.67	-1.99
GRMZM2G039365	ID_768	17	0	10.64	4.27	-3.09
GRMZM2G047616	ID_802	17	0	8.67	0.62	-4.06
GRMZM2G049229	ID_808	17	0	3.23	1.19	-0.74
GRMZM2G087901	ID_1013	17	0	6.96	2.96	-0.99
GRMZM2G093809	ID_1045	17	0	3.07	-0.53	-3.66
GRMZM2G107839	ID_1107	17	0	106.28	48.82	-38.56
GRMZM2G109627	ID_1121	17	0	3.03	-1.07	-3.45
GRMZM2G112686	ID_1137	17	0	1.73	0.65	-1.46
GRMZM2G115476	ID_1152	17	0	7.36	4.38	-5.69
GRMZM2G121070	ID_1183	17	0	3.13	1.44	-1.33
GRMZM2G149636	ID_1317	17	0	2.13	-0.18	-4.14
GRMZM2G154641	ID_1342	17	0	1.72	-0.5	-2.35
GRMZM2G155329	ID_1348	17	0	14.6	7.91	-9.04
GRMZM2G162359	ID_1371	17	0	9.68	4.44	-2.67
GRMZM2G165042	ID_1383	17	0	5.34	0.7	-2.41
GRMZM2G342738	ID_1523	17	0	13.19	1.37	-8.64
GRMZM2G351330	ID_1541	17	0	1.97	-2.04	-3.49
GRMZM2G371313	ID_1569	17	0	14.37	-4.21	-19.01
GRMZM2G417070	ID_1620	17	0	0.98	-0.62	-1.57
GRMZM2G429000	ID_1632	17	0	2.11	0.9	-0.36
GRMZM2G430394	ID_1636	17	0	9.3	0.92	-6.28
GRMZM2G439903	ID_1650	17	0	1.77	0.77	-0.21
GRMZM2G465685	ID_1692	17	0	2.24	-0.42	-5.4
GRMZM5G858249	ID_1784	17	0	3.19	-2.44	-3.09
GRMZM2G415007	ID_81	16	0	0.27	3.03	6.44
GRMZM2G371944	ID_112	16	0	0.32	3.54	11.01
GRMZM2G150697	ID_232	16	0	1.05	6.73	14.61
GRMZM2G149662	ID_236	16	0	-0.39	0.65	1.5
GRMZM2G145109	ID_244	16	0	0.23	0.83	1.41
GRMZM2G144367	ID_248	16	0	-2.35	3.84	6.85
GRMZM2G107984	ID_318	16	0	-1.13	7.41	13.26
GRMZM2G070034	ID_385	16	0	1.19	2.6	7.84
GRMZM2G042789	ID_431	16	0	2.06	60.33	100.55
GRMZM2G040508	ID_775	16	0	2.96	5.85	14.31
GRMZM2G074097	ID_933	16	0	49.66	134.19	326.43
GRMZM2G096585	ID_1053	16	0	-0.84	1.99	7.53
GRMZM2G109830	ID_1122	16	0	1.02	2.45	5.14
GRMZM2G110567	ID_1126	16	0	-0.56	1.84	4
GRMZM2G438176	ID_1646	16	0	0.24	0.84	1.75
GRMZM2G450863	ID_55	15	0	-0.69	3.25	1.81
GRMZM2G358059	ID_121	15	0	1.06	6.73	4.8
GRMZM2G146847	ID_242	15	0	5.42	26.39	26.56
GRMZM2G060561	ID_403	15	0	-0.5	0.85	0.93
AC200298.4_FG001	ID_515	15	0	-2.22	2.61	3.29
AC200622.3_FG005	ID_543	15	0	-2.98	3.04	2.95
GRMZM2G016462	ID_666	15	0	-19.02	43.85	51.58
GRMZM2G016605	ID_667	15	0	-1.35	4.7	4.33
GRMZM2G025812	ID_715	15	0	7.46	36	32.24
GRMZM2G066528	ID_897	15	0	-1.7	3.22	1.8
GRMZM2G093736	ID_1044	15	0	-0.37	1.97	1.22
GRMZM2G104118	ID_1089	15	0	0.15	2.36	1.66
GRMZM2G109550	ID_1120	15	0	-0.75	1.18	0.99
GRMZM2G145583	ID_1297	15	0	-2.99	4.48	4.61
GRMZM2G151406	ID_1326	15	0	0.2	2.95	1.77
GRMZM2G163546	ID_1376	15	0	-2.85	7.49	6.59
GRMZM2G175140	ID_1422	15	0	1.3	11.79	14.6
GRMZM2G310947	ID_1465	15	0	-0.93	1.06	1.55
GRMZM2G338702	ID_1515	15	0	-2.91	2.86	2.99
GRMZM2G369260	ID_1566	15	0	-0.04	1.03	1.18
GRMZM2G429396	ID_1635	15	0	4.62	39.39	39.24
GRMZM5G859220	ID_7	13	0	0.72	-0.77	3.06
GRMZM5G847462	ID_16	13	0	-0.08	-1.17	20.61
GRMZM2G451314	ID_54	13	0	-5.7	-7.28	11.57
GRMZM2G406830	ID_83	13	0	0.3	-0.19	1.44
GRMZM2G384884	ID_105	13	0	-3.61	-4.93	11.13
GRMZM2G343149	ID_132	13	0	-1.87	-0.42	64.04
GRMZM2G179941	ID_157	13	0	-2.3	-5.29	24.51
GRMZM2G179294	ID_159	13	0	-0.01	0.53	2.4
GRMZM2G175447	ID_168	13	0	1.47	2.49	23.29
GRMZM2G163542	ID_198	13	0	-1.3	-1.48	9.85
GRMZM2G162868	ID_199	13	0	-6.25	-5.26	9.88
GRMZM2G162675	ID_203	13	0	-1.02	-2.21	16.18
GRMZM2G159481	ID_208	13	0	-2.11	-2.19	15
GRMZM2G154648	ID_223	13	0	-45.34	-41.3	56.95
GRMZM2G125072	ID_285	13	0	-7.18	-2.99	96.71
GRMZM2G119209	ID_298	13	0	-0.09	0.5	6.75
GRMZM2G111014	ID_315	13	0	-0.44	-0.13	4.03
GRMZM2G094051	ID_338	13	0	-12.21	-12.51	17.39
GRMZM2G072861	ID_372	13	0	2.56	-23.4	39.52
GRMZM2G067315	ID_389	13	0	-3.71	-3.37	26.52
GRMZM2G064708	ID_396	13	0	-0.31	0.02	1.92
GRMZM2G054905	ID_411	13	0	0.54	-3.04	7.02
GRMZM2G044143	ID_428	13	0	-0.21	-0.71	0.86
GRMZM2G042412	ID_432	13	0	-0.16	-2.91	3.51
GRMZM2G028665	ID_457	13	0	-5.79	-6.97	81.17
GRMZM2G005146	ID_496	13	0	-6.17	-42.09	105.53
GRMZM2G002220	ID_499	13	0	-1.73	0.48	11.28
AC217358.3_FG005	ID_508	13	0	0.13	-2.19	4.17
AC196043.3_FG005	ID_528	13	0	0.48	1.11	20.64
AC196158.3_FG002	ID_531	13	0	-8.19	-9.85	17.41
AC197672.3_FG002	ID_536	13	0	0.23	-0.32	0.72
AC206582.2_FG002	ID_555	13	0	-0.9	-7.02	7.35
AC211737.3_FG012	ID_568	13	0	4.51	-4.85	12.64
AC211744.4_FG001	ID_569	13	0	-0.03	2.77	11.96
AC234160.1_FG001	ID_583	13	0	0.67	-0.24	3.39
GRMZM2G001877	ID_595	13	0	-0.45	-0.64	4.13
GRMZM2G006287	ID_613	13	0	-0.78	-0.7	22.74
GRMZM2G007795	ID_624	13	0	1.29	-0.05	2.89
GRMZM2G008108	ID_626	13	0	7.52	-0.57	17.56
GRMZM2G008789	ID_630	13	0	0.24	-0.76	6.14
GRMZM2G009958	ID_632	13	0	-15.59	-14.54	29.46
GRMZM2G011355	ID_643	13	0	-1.75	-0.84	3.42
GRMZM2G013588	ID_649	13	0	-0.16	-0.34	13.17
GRMZM2G013920	ID_651	13	0	-0.26	-0.34	6.16
GRMZM2G015727	ID_662	13	0	0	0.11	1.59
GRMZM2G023591	ID_705	13	0	-14.97	-10.51	49.45
GRMZM2G024196	ID_708	13	0	-1.23	-3.91	3.36
GRMZM2G026371	ID_719	13	0	-0.26	1.68	13.02
GRMZM2G026889	ID_721	13	0	-0.97	-0.82	1.27
GRMZM2G034611	ID_747	13	0	2.16	-5.22	9.61
GRMZM2G038926	ID_766	13	0	-2.55	-2.23	23.37
GRMZM2G041055	ID_778	13	0	-2.04	-3.01	47.52
GRMZM2G041442	ID_780	13	0	3.43	0.81	18
GRMZM2G042253	ID_783	13	0	-1.41	-1.64	14.69
GRMZM2G045128	ID_793	13	0	0.43	0.65	2.52
GRMZM2G047956	ID_804	13	0	-1.88	-2.35	22.91
GRMZM2G048377	ID_806	13	0	1.51	-2.14	6.15
GRMZM2G052178	ID_826	13	0	-1.19	-1.99	4.52
GRMZM2G053315	ID_831	13	0	-1.47	-1.75	36.26
GRMZM2G055898	ID_847	13	0	-3.43	-4.05	5.85
GRMZM2G059637	ID_866	13	0	0.74	0.18	2.39
GRMZM2G060886	ID_869	13	0	5.6	-14.25	31.66
GRMZM2G061126	ID_870	13	0	-10.08	-9.77	63.78
GRMZM2G064250	ID_887	13	0	0.64	-0.61	7.7
GRMZM2G065585	ID_893	13	0	1.53	-1.82	8.08
GRMZM2G068763	ID_904	13	0	3.05	1.61	22.96
GRMZM2G074307	ID_934	13	0	-5.36	-5.52	32.51
GRMZM2G074454	ID_936	13	0	0.34	-1.23	2.02
GRMZM2G074572	ID_937	13	0	-0.75	-1.12	2.89
GRMZM2G076943	ID_948	13	0	2.31	-0.85	16.36
GRMZM2G077088	ID_949	13	0	-0.71	0.31	5.78
GRMZM2G077914	ID_952	13	0	-0.95	-2.8	10.95
GRMZM2G078407	ID_957	13	0	-0.23	0.58	4.08
GRMZM2G079790	ID_968	13	0	-1.21	-3.58	8.66
GRMZM2G080409	ID_969	13	0	-0.44	-0.38	8.62
GRMZM2G082335	ID_977	13	0	1.06	-0.29	7.79
GRMZM2G082683	ID_980	13	0	1.07	0.77	7.46
GRMZM2G083128	ID_983	13	0	-5.87	-8.66	18.24
GRMZM2G085295	ID_1000	13	0	2.03	-0.91	5.8
GRMZM2G089750	ID_1024	13	0	-0.29	-0.12	1.51
GRMZM2G091743	ID_1039	13	0	-0.73	0.66	18.96
GRMZM2G094666	ID_1047	13	0	-0.49	-0.9	4.05
GRMZM2G095124	ID_1048	13	0	-0.4	-0.61	8.6
GRMZM2G097141	ID_1056	13	0	3.94	-6.66	19.57
GRMZM2G097468	ID_1058	13	0	0.91	0	8.82
GRMZM2G100965	ID_1071	13	0	-0.72	-0.69	6.89
GRMZM2G102860	ID_1078	13	0	-5.46	-5.49	45.47
GRMZM2G103179	ID_1081	13	0	-1.2	-0.47	2.89
GRMZM2G113421	ID_1141	13	0	-6.54	-5.13	11.33
GRMZM2G113486	ID_1143	13	0	-0.3	-1.59	4.17
GRMZM2G121753	ID_1189	13	0	-5.41	2.07	37.65
GRMZM2G128923	ID_1229	13	0	-1.07	-2.73	18.23
GRMZM2G137861	ID_1268	13	0	0.73	0.56	6.03
GRMZM2G137964	ID_1269	13	0	-5.03	-7.27	205.19
GRMZM2G143627	ID_1288	13	0	-1.18	-0.4	10.51
GRMZM2G145632	ID_1298	13	0	-4.55	-5.34	40.4
GRMZM2G146298	ID_1301	13	0	-1.1	-1.25	17.61
GRMZM2G147301	ID_1304	13	0	-0.67	0.23	3.82
GRMZM2G147854	ID_1306	13	0	-0.21	-1.41	1.24
GRMZM2G148675	ID_1310	13	0	-7.33	-10.3	96.55
GRMZM2G148768	ID_1311	13	0	-0.55	-1.03	4.04
GRMZM2G149392	ID_1313	13	0	0.19	0	1.08
GRMZM2G152089	ID_1329	13	0	2.87	-5.63	13.98
GRMZM2G156712	ID_1353	13	0	0.31	0	2.27
GRMZM2G158117	ID_1355	13	0	-7.79	-3.44	20.32
GRMZM2G159388	ID_1360	13	0	-2.37	-5.26	9.41
GRMZM2G165308	ID_1386	13	0	-1.39	-2.14	10.57
GRMZM2G165387	ID_1387	13	0	1.76	2.92	13.17
GRMZM2G171452	ID_1413	13	0	-6.6	-4.53	10.3
GRMZM2G175861	ID_1426	13	0	0.35	0	1.24
GRMZM2G314125	ID_1467	13	0	-3.44	-15.58	24.87
GRMZM2G314667	ID_1468	13	0	-0.29	0.05	1.64
GRMZM2G322819	ID_1482	13	0	0	0.09	3.88
GRMZM2G325477	ID_1489	13	0	7.25	6.48	41.4
GRMZM2G328258	ID_1498	13	0	0.29	-0.29	1.7
GRMZM2G329040	ID_1500	13	0	0.32	-4.64	6.54
GRMZM2G329306	ID_1501	13	0	1.04	0.34	2.72
GRMZM2G340297	ID_1519	13	0	-1.87	-1.34	13.02
GRMZM2G346312	ID_1530	13	0	-1.16	-31.04	94.57
GRMZM2G350734	ID_1539	13	0	1.04	0.3	3.3
GRMZM2G370162	ID_1567	13	0	-0.34	-2.05	2.48
GRMZM2G372632	ID_1570	13	0	-0.51	1.12	7.39
GRMZM2G379929	ID_1585	13	0	0.37	-0.12	3.09
GRMZM2G401883	ID_1600	13	0	-0.31	0.42	2.66
GRMZM2G402631	ID_1602	13	0	15.92	22.91	96.75
GRMZM2G404249	ID_1605	13	0	-0.39	-0.27	1.27
GRMZM2G413422	ID_1612	13	0	-0.09	2.93	19.44
GRMZM2G419994	ID_1623	13	0	-0.18	-0.03	3.89
GRMZM2G424857	ID_1626	13	0	0.64	-1.53	18.78
GRMZM2G428216	ID_1631	13	0	11.19	9.41	92.3
GRMZM2G429184	ID_1634	13	0	-3.02	-3.02	5
GRMZM2G435536	ID_1642	13	0	0.74	-1.52	7.6
GRMZM2G439337	ID_1649	13	0	-2.27	-3.03	14.6
GRMZM2G442057	ID_1653	13	0	0.28	-1.14	4.97
GRMZM2G447005	ID_1665	13	0	0.03	-0.4	5.45
GRMZM2G449941	ID_1673	13	0	0.72	-1.98	6.19
GRMZM2G455122	ID_1679	13	0	-4.01	-4.77	21.24
GRMZM2G456357	ID_1685	13	0	-0.5	0.07	5.64
GRMZM2G457309	ID_1686	13	0	-0.09	1.31	12.59
GRMZM2G473310	ID_1697	13	0	0.15	-2.09	3.08
GRMZM2G474019	ID_1699	13	0	0.44	0.05	18.88
GRMZM2G475349	ID_1705	13	0	1.07	-3.91	15.59
GRMZM2G483490	ID_1716	13	0	0	0	4.19
GRMZM2G587231	ID_1737	13	0	-0.3	-0.21	1.88
GRMZM2G701969	ID_1742	13	0	-0.7	-1.09	5.78
GRMZM5G804216	ID_1748	13	0	-0.92	-1.82	10.41
GRMZM5G834532	ID_1768	13	0	-0.63	-0.56	11.42
GRMZM5G852703	ID_1780	13	0	-0.46	-0.82	2.8
GRMZM5G862276	ID_1785	13	0	-1.58	-1.74	5.07
GRMZM5G866989	ID_1786	13	0	-0.76	-0.89	1.99
GRMZM5G877489	ID_1790	13	0	-0.54	-0.83	6.67
GRMZM5G877649	ID_1792	13	0	0.06	0.24	1.53
GRMZM5G890040	ID_1799	13	0	-0.72	0	7.88
GRMZM5G891425	ID_1801	13	0	0.21	-0.37	6.92
GRMZM5G892723	ID_1804	13	0	-2.74	-3.59	10.12
GRMZM5G899825	ID_1811	13	0	-0.85	-1.27	15.71
GRMZM5G862817	ID_6	12	0	-1.44	-0.28	-6.44
GRMZM2G449950	ID_56	12	0	3.94	10.47	-17.32
GRMZM2G395114	ID_93	12	0	-10.4	-1.98	-47.1
GRMZM2G389155	ID_102	12	0	0.54	-0.41	-3.89
GRMZM2G376661	ID_109	12	0	0.35	1.25	-1.11
GRMZM2G318213	ID_143	12	0	2.21	9.1	-7.26
GRMZM2G176197	ID_163	12	0	-0.72	4.77	-5.51
GRMZM2G154987	ID_221	12	0	-1.82	-0.64	-4.66
GRMZM2G144997	ID_245	12	0	-0.17	2.93	-9.23
GRMZM2G134130	ID_269	12	0	148.37	-88.3	-635.36
GRMZM2G133428	ID_271	12	0	6.01	12.21	-21.27
GRMZM2G089528	ID_344	12	0	15.53	13.1	-31.55
GRMZM2G081577	ID_356	12	0	-2.38	-0.4	-7.29
GRMZM2G000219	ID_502	12	0	-7.48	-1.48	-18.51
AC206951.3_FG017	ID_556	12	0	17	18.34	-42.8
AC233850.1_FG003	ID_579	12	0	0.46	8.56	-10.73
GRMZM2G004653	ID_608	12	0	0.52	2.73	-3.16
GRMZM2G025611	ID_714	12	0	-0.51	1.03	-2.73
GRMZM2G030038	ID_729	12	0	0.05	0.74	-3.14
GRMZM2G064437	ID_889	12	0	5.04	9.11	-16.07
GRMZM2G076593	ID_944	12	0	3.63	3.43	-5.93
GRMZM2G077488	ID_950	12	0	0.11	1.34	-2.57
GRMZM2G103841	ID_1086	12	0	-0.14	-0.7	-3.43
GRMZM2G104942	ID_1092	12	0	43.38	48.81	-77.02
GRMZM2G105787	ID_1097	12	0	0.02	0.92	-0.93
GRMZM2G108514	ID_1110	12	0	1.4	0.98	-5.42
GRMZM2G108959	ID_1114	12	0	-0.91	2.49	-6.96
GRMZM2G118312	ID_1170	12	0	5.42	11.49	-26.3
GRMZM2G127031	ID_1218	12	0	-1.2	-2.07	-7.75
GRMZM2G165301	ID_1385	12	0	-0.36	0.21	-1.2
GRMZM2G317262	ID_1475	12	0	0.27	0.55	-1.43
GRMZM2G342401	ID_1522	12	0	13.54	5.19	-38.38
GRMZM2G344388	ID_1526	12	0	8.39	12.7	-14.25
GRMZM2G371167	ID_1568	12	0	-0.12	2.77	-49.82
GRMZM2G394968	ID_1598	12	0	-3.03	18.47	-37.33
GRMZM5G803981	ID_1747	12	0	4.72	2.41	-13.38
GRMZM5G843302	ID_1776	12	0	-31.05	-4.89	-83.93
GRMZM5G878073	ID_1794	12	0	2.21	4.42	-4.32
GRMZM5G828630	ID_24	11	0	40.59	-67.4	74.59
GRMZM2G448511	ID_58	11	0	0.57	-1.98	0.44
GRMZM2G393436	ID_96	11	0	2.62	-3.86	0.11
GRMZM2G167008	ID_189	11	0	5.33	-7.05	3.27
GRMZM2G129775	ID_277	11	0	1.04	-1.71	1.32
GRMZM2G090070	ID_343	11	0	-0.75	-4.01	1.16
GRMZM2G048497	ID_423	11	0	-0.15	-7.64	-3.26
GRMZM2G009232	ID_489	11	0	10.51	-24.11	8.34
AC155622.2_FG004	ID_522	11	0	0.74	-2.75	1.61
AC190909.3_FG004	ID_524	11	0	-0.56	-3.03	2.02
AC199526.5_FG002	ID_541	11	0	2.35	-24.67	-4.56
AC234521.1_FG004	ID_588	11	0	3.66	-5.88	-1.01
GRMZM2G004087	ID_604	11	0	-0.43	-3.83	1.02
GRMZM2G016756	ID_669	11	0	0.32	-8.52	7.68
GRMZM2G020104	ID_694	11	0	0.63	-4.95	-0.9
GRMZM2G022514	ID_703	11	0	-0.69	-3.52	0.04
GRMZM2G030252	ID_731	11	0	0.32	-1.29	0.63
GRMZM2G031167	ID_734	11	0	-0.12	-1.49	0.13
GRMZM2G035370	ID_750	11	0	-0.13	-1.69	0.25
GRMZM2G050364	ID_817	11	0	-0.78	-5.73	-2.31
GRMZM2G062555	ID_879	11	0	1.21	-1.94	1.82
GRMZM2G076152	ID_942	11	0	-2.01	-12.74	10.35
GRMZM2G089676	ID_1022	11	0	-0.61	-1.82	0.83
GRMZM2G106548	ID_1100	11	0	-1.97	-6.27	-0.39
GRMZM2G108741	ID_1112	11	0	0.59	-0.93	0.33
GRMZM2G151230	ID_1324	11	0	-1.87	-5.85	-0.88
GRMZM2G152908	ID_1333	11	0	-13.35	-54.48	-12.66
GRMZM2G158394	ID_1358	11	0	-9.7	-28.6	-3.68
GRMZM2G171116	ID_1411	11	0	-2.11	-10.63	1.68
GRMZM2G180172	ID_1445	11	0	0.15	-0.95	0.36
GRMZM2G302913	ID_1455	11	0	-0.52	-1.42	0.05
GRMZM2G315375	ID_1471	11	0	0.66	-3.22	0.2
GRMZM2G318010	ID_1476	11	0	-0.04	-4.21	-0.9
GRMZM2G319955	ID_1479	11	0	-1.01	-3.28	-0.73
GRMZM2G325650	ID_1490	11	0	8.77	-26.34	10.76
GRMZM2G380286	ID_1586	11	0	0.35	-1.22	-0.38
GRMZM2G387890	ID_1594	11	0	-0.86	-2.81	0.28
GRMZM2G430849	ID_1637	11	0	0.91	-7.5	-2.99
GRMZM2G438871	ID_1648	11	0	1.39	-5.74	-0.77
GRMZM2G444378	ID_1659	11	0	1.69	-4.14	3.33
GRMZM2G449552	ID_1670	11	0	-2.36	-6.54	-0.3
GRMZM2G531230	ID_1725	11	0	6.24	-26.48	32.05
GRMZM2G553687	ID_1732	11	0	0.77	-1.13	0.32
GRMZM5G818101	ID_1757	11	0	0.5	-2.53	1.36
GRMZM5G824439	ID_1760	11	0	-0.23	-2.19	1.74
GRMZM5G840610	ID_1772	11	0	-0.2	-1.31	-0.07
GRMZM5G850607	ID_1778	11	0	2.69	-5.51	6.65
GRMZM5G852533	ID_1779	11	0	1.16	-2.24	1.26
GRMZM5G891969	ID_1803	11	0	7.56	-16.59	-1.92
GRMZM2G480106	ID_36	10	0	1.43	-5.12	-3.51
GRMZM2G320373	ID_140	10	0	-0.06	-1.12	-0.86
GRMZM2G162768	ID_200	10	0	-1.09	-5.56	-5.23
GRMZM2G159200	ID_209	10	0	1.11	-5.51	-5.13
GRMZM2G154628	ID_224	10	0	-1.71	-14.58	-17.36
GRMZM2G071401	ID_380	10	0	-0.79	-4.61	-3.79
GRMZM2G040441	ID_438	10	0	-1.45	-5.61	-5.46
GRMZM2G014580	ID_476	10	0	4.93	-8.1	-2.78
AC196059.3_FG003	ID_529	10	0	-0.24	-7.11	-4.82
AC206223.3_FG010	ID_554	10	0	2.84	-8.88	-8.3
AC212023.4_FG004	ID_570	10	0	65.25	-108.43	-73.15
GRMZM2G000829	ID_592	10	0	1.72	-2.93	-0.96
GRMZM2G004641	ID_607	10	0	1.56	-3.52	-1.32
GRMZM2G045154	ID_794	10	0	-0.23	-7.57	-6.4
GRMZM2G058364	ID_859	10	0	-0.08	-1.82	-1.05
GRMZM2G075140	ID_939	10	0	6.36	-6.64	-5.68
GRMZM2G087728	ID_1011	10	0	-1.35	-13.55	-9.77
GRMZM2G091233	ID_1032	10	0	0.37	-0.67	-0.54
GRMZM2G091456	ID_1035	10	0	-0.5	-13.61	-14.23
GRMZM2G124684	ID_1202	10	0	4.61	-6.47	-8.2
GRMZM2G141026	ID_1280	10	0	1.01	-4.02	-3.74
GRMZM2G159908	ID_1362	10	0	-0.39	-18	-12.87
GRMZM2G166671	ID_1394	10	0	0.07	-0.99	-1.22
GRMZM2G315431	ID_1472	10	0	0.71	-1.05	-0.77
GRMZM2G346982	ID_1534	10	0	1.59	-1.52	-1.55
GRMZM2G351232	ID_1540	10	0	2.25	-2.92	-1.38
GRMZM2G414047	ID_1617	10	0	-0.23	-2.55	-3.06
GRMZM2G444623	ID_1660	10	0	26.2	-44.68	-32.37
GRMZM2G448001	ID_1667	10	0	-18.53	-97.31	-83.79
GRMZM2G450866	ID_1676	10	0	3.95	-8.64	-10.94
GRMZM2G469142	ID_1694	10	0	0.01	-11.64	-6.65
GRMZM5G877838	ID_1793	10	0	-1.17	-9.05	-7.12
GRMZM2G164974	ID_194	9	0	-2.61	-34.84	-47.83
GRMZM2G150893	ID_230	9	0	-2.56	-27.54	-44.63
GRMZM2G139467	ID_256	9	0	1.44	-8.92	-18.92
GRMZM2G104626	ID_326	9	0	-0.67	-4.15	-6.47
GRMZM2G085845	ID_349	9	0	0.66	-5.54	-8.4
GRMZM2G078887	ID_962	9	0	-0.9	-5.54	-10.4
GRMZM2G136085	ID_1259	9	0	-0.38	-2.66	-3.8
GRMZM2G139786	ID_1277	9	0	-1.72	-19.4	-48.08
GRMZM2G475128	ID_1703	9	0	1.6	-2.04	-3.89
GRMZM2G149535	ID_237	8	0	-6.99	2.39	10.22
GRMZM2G040728	ID_437	8	0	-4.91	-2.2	1.38
GRMZM2G013652	ID_482	8	0	-5.46	-0.55	3.94
GRMZM2G002178	ID_500	8	0	-4.08	-0.06	1.59
GRMZM2G006704	ID_618	8	0	-14.36	-1.1	10.06
GRMZM2G015432	ID_659	8	0	-5.97	-4.86	6.62
GRMZM2G031326	ID_737	8	0	-0.51	-0.34	0.64
GRMZM2G049378	ID_809	8	0	-10.04	0.06	24.14
GRMZM2G053669	ID_834	8	0	-21.22	-8.92	27.2
GRMZM2G054378	ID_838	8	0	-3.46	-0.7	2.68
GRMZM2G066222	ID_894	8	0	-18.43	-11.96	24.18
GRMZM2G081538	ID_972	8	0	-1.18	0.98	2.09
GRMZM2G087165	ID_1009	8	0	-4.02	-2.16	1.54
GRMZM2G095252	ID_1049	8	0	-14.8	-7.3	7.19
GRMZM2G125529	ID_1209	8	0	-3.62	-1.13	1.14
GRMZM2G137321	ID_1264	8	0	-3.77	0.83	5.65
GRMZM2G144273	ID_1293	8	0	-2.47	-1.12	3.71
GRMZM2G154344	ID_1339	8	0	-10.46	-0.54	16.79
GRMZM2G158835	ID_1359	8	0	-76.81	-5.87	59.82
GRMZM2G166603	ID_1393	8	0	-3.75	-0.93	2.55
GRMZM2G173868	ID_1418	8	0	-0.58	-0.43	0.54
GRMZM2G302604	ID_1454	8	0	-4.58	-3.43	4.53
GRMZM2G334740	ID_1510	8	0	-2.24	-1.36	1.85
GRMZM2G338809	ID_1516	8	0	-1.55	0.61	2.78
GRMZM2G365374	ID_1562	8	0	-2.54	-0.67	1.6
GRMZM2G411764	ID_1611	8	0	-10.28	-5.3	3.63
GRMZM2G436533	ID_1644	8	0	-2.61	1.88	3.35
GRMZM2G544510	ID_1727	8	0	-2.05	-0.8	0.92
GRMZM2G700968	ID_1740	8	0	-0.94	-0.38	0.41
GRMZM5G829554	ID_1764	8	0	-5.42	-3.14	3.61
GRMZM5G893912	ID_1805	8	0	-1.28	0.28	3.31
GRMZM5G899188	ID_1810	8	0	-1.69	-0.42	1.42
GRMZM5G825090	ID_26	7	0	-17.83	3.08	2.66
GRMZM2G472696	ID_43	7	0	-1.22	0.85	0.12
GRMZM2G427557	ID_66	7	0	-11.43	11.34	8.45
GRMZM2G422212	ID_76	7	0	-7.61	-3.8	-3.65
GRMZM2G169372	ID_182	7	0	-161.63	97.36	64.16
GRMZM2G157207	ID_217	7	0	-25.23	-0.45	-7.77
GRMZM2G112524	ID_311	7	0	-9.16	-4.08	-3.44
GRMZM2G108467	ID_317	7	0	-3.57	0.25	-1.43
GRMZM2G091189	ID_342	7	0	-10	3.9	1.77
AC155610.2_FG009	ID_521	7	0	-137.79	27.77	69.35
GRMZM2G003306	ID_599	7	0	-8.64	6.27	-0.15
GRMZM2G007729	ID_623	7	0	-2.08	0.84	1.01
GRMZM2G015024	ID_656	7	0	-27.14	-6.09	-8.5
GRMZM2G042164	ID_782	7	0	-6.05	-0.3	1.58
GRMZM2G055151	ID_841	7	0	-44.39	-9.31	8.79
GRMZM2G063676	ID_883	7	0	-2.1	-0.75	-0.14
GRMZM2G064136	ID_886	7	0	-163.48	-11.3	-3.06
GRMZM2G064356	ID_888	7	0	-12.76	-0.78	-4.63
GRMZM2G071808	ID_923	7	0	-15.74	-1.76	-1.32
GRMZM2G077530	ID_951	7	0	-5.44	4.7	2.78
GRMZM2G078314	ID_956	7	0	-8.36	6.32	7.52
GRMZM2G090872	ID_1031	7	0	-10.81	-4.33	-3.25
GRMZM2G100336	ID_1066	7	0	-6.22	-0.15	0.49
GRMZM2G150260	ID_1322	7	0	-28.42	26.29	7.9
GRMZM2G385622	ID_1592	7	0	-22.4	2.79	6.06
GRMZM2G493903	ID_1720	7	0	-443.43	228.45	242.1
GRMZM2G517408	ID_1723	7	0	-46.52	-16	-6.55
GRMZM5G809335	ID_1752	7	0	-9.61	2.85	-2.22
GRMZM5G813783	ID_1754	7	0	-22.1	-2.61	2.4
GRMZM5G856929	ID_8	6	0	-4.69	4.71	-4.59
GRMZM5G810061	ID_27	6	0	-62.29	-11.24	-79.14
GRMZM5G807064	ID_28	6	0	-4.61	0.45	-9.56
GRMZM2G471517	ID_44	6	0	-1.69	1.26	-3.89
GRMZM2G448142	ID_59	6	0	-553.81	-1.15	-301.15
GRMZM2G427087	ID_67	6	0	-3.29	-0.84	-2.38
GRMZM2G421946	ID_77	6	0	-16.58	-7.47	-19.55
GRMZM2G304947	ID_153	6	0	-796.51	-144.19	-483.13
GRMZM2G165272	ID_193	6	0	-1.52	-0.76	-1.43
GRMZM2G160327	ID_206	6	0	-3.08	2.26	-5.5
GRMZM2G157369	ID_216	6	0	-28.16	-6.43	-39.23
GRMZM2G138750	ID_257	6	0	-0.99	-0.14	-1.83
GRMZM2G130173	ID_275	6	0	-140.88	261.58	-401.07
GRMZM2G115422	ID_309	6	0	-1.31	0.67	-2.16
GRMZM2G096792	ID_336	6	0	-24.04	1.58	-13.42
GRMZM2G089448	ID_345	6	0	-6.41	2.6	-10.63
GRMZM2G014395	ID_478	6	0	-8.05	8.95	-13.93
GRMZM2G013798	ID_480	6	0	-62.6	-28.39	-47.79
AC210013.4_FG018	ID_563	6	0	-32.04	15.44	-73.57
AC210158.3_FG003	ID_564	6	0	-0.47	0.67	-0.89
GRMZM2G010545	ID_633	6	0	-0.63	0.49	-0.63
GRMZM2G014055	ID_652	6	0	-222.87	-10.37	-138.73
GRMZM2G017532	ID_677	6	0	-20.03	-5.76	-19.27
GRMZM2G018080	ID_682	6	0	-9.74	-3.56	-5.85
GRMZM2G026188	ID_718	6	0	-2.22	3.38	-4.97
GRMZM2G039949	ID_772	6	0	-1.86	0.27	-1.42
GRMZM2G040890	ID_776	6	0	-3.17	-1.18	-3.33
GRMZM2G044498	ID_788	6	0	-15.71	8.1	-17.52
GRMZM2G057959	ID_856	6	0	-4.8	-0.82	-2.66
GRMZM2G080724	ID_971	6	0	-0.76	0.35	-0.4
GRMZM2G082608	ID_979	6	0	-16.6	10.94	-11.71
GRMZM2G102923	ID_1079	6	0	-3.31	1.83	-3.75
GRMZM2G110657	ID_1127	6	0	-27.34	-6.27	-16.34
GRMZM2G121700	ID_1188	6	0	-2.02	-0.49	-2.94
GRMZM2G124540	ID_1201	6	0	-4.2	-1.12	-6.77
GRMZM2G127821	ID_1223	6	0	-10.52	16.59	-29.25
GRMZM2G128651	ID_1227	6	0	-1.47	1.19	-0.87
GRMZM2G137161	ID_1263	6	0	-3.47	1.45	-1.98
GRMZM2G149556	ID_1316	6	0	-6.68	13.8	-21.02
GRMZM2G151319	ID_1325	6	0	-8.01	-1.74	-9.6
GRMZM2G154332	ID_1338	6	0	-31.1	-13.47	-30.89
GRMZM2G168474	ID_1401	6	0	-2.33	0.35	-1.98
GRMZM2G303044	ID_1456	6	0	-10.91	10.17	-15.1
GRMZM2G346757	ID_1531	6	0	-140.28	28.7	-67.09
GRMZM2G350225	ID_1538	6	0	-3.94	3.16	-5.75
GRMZM5G895188	ID_1806	6	0	-8.59	-0.97	-13.22
GRMZM2G702522	ID_32	5	0	-14.56	-21.29	11.9
GRMZM2G479000	ID_37	5	0	-26.17	-32.27	-10.48
GRMZM2G400961	ID_85	5	0	-2.84	-3.95	-1.11
GRMZM2G399136	ID_89	5	0	-97.3	-184.79	9.22
GRMZM2G387360	ID_104	5	0	-44.21	-53.52	-12.86
GRMZM2G373522	ID_111	5	0	-1.57	-3.03	-0.08
GRMZM2G358987	ID_120	5	0	-3.41	-3.41	-0.87
GRMZM2G322817	ID_137	5	0	-30.93	-38.79	-8.52
GRMZM2G181371	ID_155	5	0	-18.3	-21.45	-1.05
GRMZM2G173413	ID_173	5	0	-25.1	-27.21	-5.82
GRMZM2G171139	ID_177	5	0	-0.69	-1.13	0.1
GRMZM2G170870	ID_178	5	0	-34.14	-34.84	-6.61
GRMZM2G139600	ID_254	5	0	-0.99	-1.46	0.23
GRMZM2G135013	ID_265	5	0	-2.99	-2.71	-0.96
GRMZM2G119252	ID_296	5	0	-1.74	-2.67	0.79
GRMZM2G112284	ID_313	5	0	-22.53	-25.25	-11.78
GRMZM2G086841	ID_347	5	0	-13.93	-16.36	-1.33
GRMZM2G081032	ID_358	5	0	-2.5	-2.02	1.02
GRMZM2G045286	ID_427	5	0	-3.25	-2.5	0.29
GRMZM2G031938	ID_454	5	0	-4.66	-4.61	3.07
GRMZM2G028393	ID_460	5	0	-737.71	-945.31	516.16
GRMZM2G013398	ID_484	5	0	-3.64	-4.18	-1.5
GRMZM2G005552	ID_494	5	0	-4.12	-11.45	6.46
AC205077.3_FG003	ID_551	5	0	-17.28	-10.24	-4.9
AC209858.4_FG004	ID_562	5	0	-6.98	-8.71	-1.79
EF517601.1_FG025	ID_589	5	0	-11.43	-14.21	-5.08
GRMZM2G003711	ID_600	5	0	-35.39	-35.56	-14.43
GRMZM2G004694	ID_609	5	0	-2.22	-3.45	0.33
GRMZM2G011598	ID_644	5	0	-5.68	-4.31	1.57
GRMZM2G015136	ID_657	5	0	-6.88	-9.21	5.2
GRMZM2G018027	ID_680	5	0	-19.46	-23.05	-0.67
GRMZM2G019183	ID_688	5	0	-13.95	-16.18	-6.96
GRMZM2G021973	ID_700	5	0	-54.45	-62.25	29.52
GRMZM2G023769	ID_707	5	0	-1.92	-3.33	2.19
GRMZM2G032028	ID_740	5	0	-24.22	-23.01	10.43
GRMZM2G041022	ID_777	5	0	-6.85	-6.81	2.76
GRMZM2G041454	ID_781	5	0	-1	-1.49	1.11
GRMZM2G050131	ID_815	5	0	-16.62	-14.73	-2.09
GRMZM2G050961	ID_822	5	0	-46.36	-27.67	-2.03
GRMZM2G052796	ID_830	5	0	-29.71	-33.78	-0.74
GRMZM2G053588	ID_833	5	0	-1.92	-2.7	1.21
GRMZM2G054115	ID_837	5	0	-22.17	-24.61	-0.31
GRMZM2G054405	ID_839	5	0	-58.83	-50.82	-18.6
GRMZM2G058081	ID_857	5	0	-1.67	-5.32	4.01
GRMZM2G069651	ID_912	5	0	-3.59	-5.82	0.34
GRMZM2G071771	ID_921	5	0	-1.47	-2.53	0.58
GRMZM2G076602	ID_945	5	0	-13.18	-13.8	-6.12
GRMZM2G076844	ID_947	5	0	-14.35	-12.5	5.99
GRMZM2G078409	ID_958	5	0	-28.89	-32.67	-12.19
GRMZM2G082032	ID_973	5	0	-17.31	-21.88	18.32
GRMZM2G084116	ID_993	5	0	-29.9	-40.25	-4.85
GRMZM2G085301	ID_1001	5	0	-14.57	-9.89	-1.99
GRMZM2G085909	ID_1006	5	0	-3.94	-5.47	0.22
GRMZM2G088511	ID_1015	5	0	-65.39	-49.61	-14.77
GRMZM2G089421	ID_1018	5	0	-36.85	-33.96	-7.96
GRMZM2G092627	ID_1041	5	0	-0.83	-1.65	1.24
GRMZM2G095905	ID_1050	5	0	-1.18	-2.09	0.21
GRMZM2G100467	ID_1069	5	0	-26.07	-27.65	-0.89
GRMZM2G103250	ID_1082	5	0	-8.92	-6.71	-1.52
GRMZM2G103647	ID_1085	5	0	-60.81	-63.53	-21.3
GRMZM2G109405	ID_1118	5	0	-10.69	-13.07	-4.41
GRMZM2G112656	ID_1136	5	0	-18.52	-17.82	-7.61
GRMZM2G114945	ID_1150	5	0	-17.02	-15.16	-2.81
GRMZM2G117369	ID_1161	5	0	-5.63	-8.3	1.82
GRMZM2G117608	ID_1164	5	0	-4.05	-3.65	3.3
GRMZM2G117754	ID_1165	5	0	-5.5	-7.59	1.79
GRMZM2G119691	ID_1178	5	0	-23.31	-26.5	-7.74
GRMZM2G119705	ID_1179	5	0	-5.49	-4.86	2.98
GRMZM2G122231	ID_1193	5	0	-17.47	-29.42	5.45
GRMZM2G124143	ID_1200	5	0	-4.09	-3.42	1.51
GRMZM2G125300	ID_1206	5	0	-10.73	-7.75	1.93
GRMZM2G125571	ID_1210	5	0	-26.23	-36.53	11.67
GRMZM2G132568	ID_1247	5	0	-6.79	-7	0.2
GRMZM2G134020	ID_1251	5	0	-36.76	-44.65	-13.28
GRMZM2G134430	ID_1254	5	0	-15.74	-13.81	4.74
GRMZM2G145201	ID_1295	5	0	-2.28	-2.77	-0.8
GRMZM2G145461	ID_1296	5	0	-9.5	-9.52	-1.42
GRMZM2G145816	ID_1299	5	0	-2.79	-3.42	1.47
GRMZM2G154896	ID_1346	5	0	-4.39	-4.11	1.91
GRMZM2G161315	ID_1367	5	0	-5.25	-8.41	-0.79
GRMZM2G162527	ID_1373	5	0	-25.84	-56.22	18.16
GRMZM2G165613	ID_1390	5	0	-3.04	-4.69	0.72
GRMZM2G168077	ID_1398	5	0	-2.43	-2.35	1.54
GRMZM2G168674	ID_1402	5	0	-21.15	-17.17	18.63
GRMZM2G173710	ID_1417	5	0	-18.84	-36.02	15.34
GRMZM2G181081	ID_1450	5	0	-1.15	-2.4	0.24
GRMZM2G326235	ID_1492	5	0	-124.29	-129.58	-56.09
GRMZM2G326545	ID_1494	5	0	-8.16	-4.34	-1.92
GRMZM2G327311	ID_1496	5	0	-0.69	-1.43	0.68
GRMZM2G327564	ID_1497	5	0	-57.86	-39.34	1.05
GRMZM2G338465	ID_1514	5	0	-3.99	-5.17	-1.19
GRMZM2G348956	ID_1536	5	0	-4.97	-6.89	-1.72
GRMZM2G352618	ID_1542	5	0	-10.07	-23.86	5.06
GRMZM2G375159	ID_1574	5	0	-2.14	-1.76	-0.79
GRMZM2G395778	ID_1599	5	0	-9.06	-5.95	2.83
GRMZM2G415215	ID_1619	5	0	-0.37	-1.09	0.77
GRMZM2G421256	ID_1624	5	0	-3.35	-3.9	-0.91
GRMZM2G455828	ID_1684	5	0	-36.83	-24.24	0.59
GRMZM2G465226	ID_1691	5	0	-6.51	-4.88	4.2
GRMZM2G475899	ID_1707	5	0	-18.11	-19.31	-8.09
GRMZM5G856297	ID_9	4	0	-7.54	-5.89	-3.79
GRMZM5G803565	ID_29	4	0	-36.82	-35.95	-31.2
GRMZM2G568636	ID_33	4	0	-359.78	-372.85	-379.31
GRMZM2G436710	ID_62	4	0	-32.24	-17.96	-21.01
GRMZM2G428027	ID_65	4	0	-3.64	-4.59	-3.06
GRMZM2G422240	ID_75	4	0	-49.9	-47.12	-37.22
GRMZM2G400281	ID_88	4	0	-8.8	-7.39	-6.23
GRMZM2G394732	ID_94	4	0	-10.25	-8.79	-7.22
GRMZM2G392513	ID_97	4	0	-16.19	-20.2	-19.76
GRMZM2G390124	ID_99	4	0	-26.75	-34.29	-26.46
GRMZM2G380088	ID_107	4	0	-15.63	-19.34	-15.37
GRMZM2G345493	ID_129	4	0	-702.38	-774.84	-536.55
GRMZM2G309193	ID_151	4	0	-226.34	-154.96	-186.86
GRMZM2G178038	ID_160	4	0	-9.57	-10.12	-10.54
GRMZM2G170400	ID_179	4	0	-1.82	-2.02	-1.44
GRMZM2G169654	ID_180	4	0	-16.59	-13.5	-20.31
GRMZM2G166971	ID_190	4	0	-50.53	-54.17	-58.98
GRMZM2G157517	ID_213	4	0	-55.68	-34.01	-43.16
GRMZM2G157505	ID_214	4	0	-14.53	-10.32	-8.7
GRMZM2G154223	ID_226	4	0	-198.58	-182.2	-193.2
GRMZM2G147882	ID_240	4	0	-19.81	-18.63	-22.13
GRMZM2G140924	ID_252	4	0	-23.16	-24.52	-17.43
GRMZM2G139512	ID_255	4	0	-8.94	-6.44	-10.5
GRMZM2G137582	ID_261	4	0	-9.4	-13.13	-11.91
GRMZM2G137535	ID_262	4	0	-233.19	-242.55	-165.46
GRMZM2G124335	ID_286	4	0	-12.1	-13.97	-14.22
GRMZM2G123719	ID_287	4	0	-43.03	-33.78	-51.03
GRMZM2G119773	ID_294	4	0	-2.46	-1.36	-1.49
GRMZM2G106190	ID_323	4	0	-25.26	-28.88	-23.64
GRMZM2G099036	ID_333	4	0	-54.68	-61.49	-51.22
GRMZM2G086835	ID_348	4	0	-31.3	-20.54	-20.17
GRMZM2G079381	ID_362	4	0	-101.58	-105.85	-125.73
GRMZM2G071996	ID_376	4	0	-139.33	-154.03	-173.15
GRMZM2G069722	ID_387	4	0	-38.48	-35.57	-36.18
GRMZM2G068557	ID_388	4	0	-130.59	-173.84	-128.41
GRMZM2G065012	ID_395	4	0	-3.55	-3.22	-3.39
GRMZM2G049349	ID_420	4	0	-4.22	-3.56	-3.21
GRMZM2G048561	ID_421	4	0	-2.36	-2.14	-1.57
GRMZM2G034110	ID_450	4	0	-15.15	-10.83	-9.22
GRMZM2G017319	ID_472	4	0	-21.3	-23.58	-25.91
GRMZM2G005433	ID_495	4	0	-51.28	-59.27	-37.33
AC203985.4_FG001	ID_546	4	0	-5.41	-5.31	-5.94
AC205362.4_FG002	ID_553	4	0	-14.12	-19.52	-14.47
AC208897.3_FG004	ID_559	4	0	-9.21	-11.01	-9.87
GRMZM2G003769	ID_601	4	0	-30.1	-22.82	-22.68
GRMZM2G006363	ID_616	4	0	-34.19	-29.64	-29.31
GRMZM2G007939	ID_625	4	0	-381.2	-406.04	-344.99
GRMZM2G011269	ID_642	4	0	-135.78	-153.87	-132.79
GRMZM2G014902	ID_655	4	0	-118.39	-145.57	-108.38
GRMZM2G017249	ID_673	4	0	-95.51	-81.66	-84.53
GRMZM2G017351	ID_674	4	0	-40.26	-38.51	-39.83
GRMZM2G017355	ID_675	4	0	-2.85	-3.42	-3.29
GRMZM2G019974	ID_692	4	0	-3.86	-3.26	-2.26
GRMZM2G031607	ID_739	4	0	-2.81	-2.61	-1.93
GRMZM2G035749	ID_752	4	0	-107.13	-134.56	-99.1
GRMZM2G043500	ID_786	4	0	-29.75	-22.3	-15.98
GRMZM2G043878	ID_787	4	0	-4.21	-2.57	-2.16
GRMZM2G046583	ID_801	4	0	-4.42	-3.89	-3.15
GRMZM2G048430	ID_807	4	0	-2.44	-3.01	-2.23
GRMZM2G052671	ID_829	4	0	-1.21	-0.94	-0.81
GRMZM2G055699	ID_846	4	0	-9.47	-6.13	-6.85
GRMZM2G056116	ID_848	4	0	-24.24	-24.96	-32.24
GRMZM2G062488	ID_877	4	0	-13.94	-16.21	-15.07
GRMZM2G063151	ID_882	4	0	-6.47	-7.75	-5.93
GRMZM2G069649	ID_911	4	0	-14.5	-14.79	-12.25
GRMZM2G070863	ID_916	4	0	-1.23	-1.09	-1.12
GRMZM2G076257	ID_943	4	0	-1.41	-1.17	-0.73
GRMZM2G082034	ID_974	4	0	-83.24	-94.34	-77.15
GRMZM2G082520	ID_978	4	0	-19.83	-22.17	-26.28
GRMZM2G083058	ID_982	4	0	-32.44	-42.82	-31.03
GRMZM2G083812	ID_992	4	0	-1.91	-2.21	-2.01
GRMZM2G084327	ID_994	4	0	-8.79	-9.1	-6.62
GRMZM2G085336	ID_1003	4	0	-7.78	-6.22	-3.82
GRMZM2G090865	ID_1030	4	0	-45.03	-38.35	-35.7
GRMZM2G091857	ID_1040	4	0	-8.75	-7.28	-8.14
GRMZM2G095964	ID_1051	4	0	-44.85	-39.09	-31.42
GRMZM2G102365	ID_1075	4	0	-20.17	-22.43	-17.31
GRMZM2G105604	ID_1095	4	0	-29.58	-31.74	-28.42
GRMZM2G107388	ID_1105	4	0	-19.28	-23.99	-21.31
GRMZM2G110681	ID_1128	4	0	-23.01	-27.53	-28.35
GRMZM2G110997	ID_1130	4	0	-5.41	-2.58	-3.55
GRMZM2G114182	ID_1145	4	0	-16.91	-16.56	-11.95
GRMZM2G115566	ID_1154	4	0	-37.4	-20.78	-23.45
GRMZM2G116327	ID_1156	4	0	-6.86	-6.06	-4.79
GRMZM2G118104	ID_1168	4	0	-25.92	-25.13	-32.38
GRMZM2G121843	ID_1190	4	0	-3.88	-4.17	-2.35
GRMZM2G122431	ID_1196	4	0	-14.68	-17.58	-20.24
GRMZM2G130366	ID_1234	4	0	-5.51	-5.77	-3.9
GRMZM2G131087	ID_1238	4	0	-389.6	-461.74	-403.61
GRMZM2G131340	ID_1241	4	0	-48.44	-52.07	-53.32
GRMZM2G131912	ID_1242	4	0	-4.49	-3.82	-4.08
GRMZM2G134219	ID_1252	4	0	-11.32	-11.62	-10.62
GRMZM2G139689	ID_1276	4	0	-10.21	-11.3	-9.78
GRMZM2G140107	ID_1279	4	0	-18.42	-24.13	-18.53
GRMZM2G145041	ID_1294	4	0	-17.7	-21.9	-16.19
GRMZM2G148621	ID_1309	4	0	-43.02	-49.39	-51.95
GRMZM2G149534	ID_1315	4	0	-33.16	-29.66	-24.12
GRMZM2G153103	ID_1334	4	0	-58.9	-64.23	-45.3
GRMZM2G154505	ID_1340	4	0	-178.56	-178.7	-160.46
GRMZM2G154667	ID_1343	4	0	-59.27	-40.55	-35.2
GRMZM2G156517	ID_1351	4	0	-8.24	-8	-6.07
GRMZM2G158232	ID_1356	4	0	-36.5	-40.51	-34.93
GRMZM2G162282	ID_1370	4	0	-60.13	-63.59	-51.87
GRMZM2G171616	ID_1415	4	0	-10.35	-10.81	-12.26
GRMZM2G176595	ID_1428	4	0	-13.52	-11.97	-14.25
GRMZM2G179133	ID_1442	4	0	-14.56	-9.77	-8.95
GRMZM2G306679	ID_1460	4	0	-1.65	-1.65	-1.2
GRMZM2G324390	ID_1486	4	0	-17.16	-13.54	-18.54
GRMZM2G326270	ID_1493	4	0	-205.63	-223.99	-247.57
GRMZM2G334181	ID_1509	4	0	-10.18	-11.67	-7.99
GRMZM2G335242	ID_1511	4	0	-2.84	-3.44	-2.57
GRMZM2G339122	ID_1518	4	0	-14.12	-13.85	-14.27
GRMZM2G346861	ID_1533	4	0	-31.14	-32.42	-28.78
GRMZM2G347708	ID_1535	4	0	-47.5	-53.12	-47.87
GRMZM2G360191	ID_1553	4	0	-6.92	-8.36	-7.39
GRMZM2G360681	ID_1555	4	0	-1.48	-2.01	-1.52
GRMZM2G404025	ID_1603	4	0	-428.75	-254.62	-228.4
GRMZM2G414844	ID_1618	4	0	-5.95	-5.67	-4.06
GRMZM2G431039	ID_1638	4	0	-1.85	-2.15	-1.65
GRMZM2G449160	ID_1669	4	0	-50.09	-57.56	-66.36
GRMZM2G450273	ID_1674	4	0	-7.9	-7.22	-4.51
GRMZM2G474546	ID_1701	4	0	-33.27	-32.63	-44.19
GRMZM2G474769	ID_1702	4	0	-102.56	-97.95	-129.51
GRMZM5G802801	ID_1744	4	0	-3.6	-2.54	-3.84
GRMZM5G803874	ID_1746	4	0	-24.03	-17.48	-19.34
GRMZM5G833328	ID_1766	4	0	-6.67	-6.08	-7.59
GRMZM5G835235	ID_1769	4	0	-171.64	-165.87	-216.19
GRMZM5G839640	ID_1770	4	0	-133.44	-86.11	-101.71
GRMZM2G308944	ID_152	3	0	-321.78	-405.61	-572.37
GRMZM2G175401	ID_169	3	0	-44.33	-40.67	-75.69
GRMZM2G140033	ID_253	3	0	-5.63	-5.88	-14.48
GRMZM2G138455	ID_258	3	0	-4.48	-2.39	-5.69
GRMZM2G119316	ID_295	3	0	-3.19	-3.94	-5.84
GRMZM2G070475	ID_384	3	0	-0.71	-0.42	-1.01
GRMZM2G069928	ID_386	3	0	-2.88	-1.54	-3.64
GRMZM2G065829	ID_393	3	0	-12.55	-7.22	-16.22
GRMZM2G056407	ID_408	3	0	-1.02	-1.3	-2.1
GRMZM2G038291	ID_442	3	0	-5.4	-5.65	-14.25
GRMZM2G032619	ID_452	3	0	-9.58	-14.91	-37.53
GRMZM2G009282	ID_488	3	0	-0.44	-0.5	-1.12
GRMZM2G004483	ID_606	3	0	-15.75	-14.45	-23.74
GRMZM2G032107	ID_741	3	0	-41.36	-14.11	-72.73
GRMZM2G039278	ID_767	3	0	-3.32	-2.35	-5.5
GRMZM2G044902	ID_792	3	0	-11.77	-5.33	-17.45
GRMZM2G046382	ID_799	3	0	-1.39	-0.83	-2.69
GRMZM2G065244	ID_892	3	0	-7.41	-6.99	-14.31
GRMZM2G079559	ID_966	3	0	-71.7	-68.19	-102.74
GRMZM2G086269	ID_1007	3	0	-6.83	-6.22	-10.25
GRMZM2G090576	ID_1028	3	0	-3.38	-2.86	-5.55
GRMZM2G110309	ID_1124	3	0	-6.6	-3.42	-14.9
GRMZM2G113052	ID_1138	3	0	-14.92	-9.72	-19.44
GRMZM2G113480	ID_1142	3	0	-155.34	-100.49	-197.19
GRMZM2G121494	ID_1187	3	0	-82.01	-85.21	-142.87
GRMZM2G131165	ID_1239	3	0	-24.1	-16.92	-41.1
GRMZM2G137120	ID_1262	3	0	-19.62	-13.85	-26.75
GRMZM2G151468	ID_1327	3	0	-2.01	-1.74	-2.72
GRMZM2G154509	ID_1341	3	0	-8.1	-5.37	-10.7
GRMZM2G165192	ID_1384	3	0	-23.11	-16.41	-31.53
GRMZM2G310431	ID_1464	3	0	-2.63	-1.05	-4.13
GRMZM2G337706	ID_1513	3	0	-10.93	-7.38	-16.15
GRMZM2G455809	ID_1683	3	0	-15.92	-12	-19.3
GRMZM5G819464	ID_1758	3	0	-3.86	-4.41	-9.59
GRMZM5G878379	ID_1795	3	0	-7.11	-2.75	-10.92
GRMZM2G476762	ID_41	1	0	-14.01	-44.03	-45.36
GRMZM2G420743	ID_78	1	0	-4.33	-11.49	-11.09
GRMZM2G353024	ID_126	1	0	-34.25	-57.19	-49.57
GRMZM2G157458	ID_215	1	0	-20.19	-58.02	-39.94
GRMZM2G157153	ID_218	1	0	-5.11	-9.18	-9.31
GRMZM2G121264	ID_292	1	0	-52.87	-84.48	-67.15
GRMZM2G057616	ID_406	1	0	-21.96	-39.55	-32.31
GRMZM2G039886	ID_440	1	0	-4.65	-6.49	-7.95
GRMZM2G032478	ID_453	1	0	-50.8	-67.71	-77.48
EF517601.1_FG009	ID_503	1	0	-8.81	-17.47	-12.93
AC208204.3_FG006	ID_558	1	0	-11.74	-17.6	-15.64
AC217300.3_FG005	ID_575	1	0	-29.31	-102.37	-102.22
AC234159.1_FG002	ID_582	1	0	-4.9	-11.83	-11.84
GRMZM2G000221	ID_590	1	0	-3.08	-4.78	-5.22
GRMZM2G001247	ID_593	1	0	-4.48	-6.78	-5.52
GRMZM2G055180	ID_842	1	0	-9.08	-14.89	-12.47
GRMZM2G057451	ID_855	1	0	-2.78	-7.19	-6.24
GRMZM2G067915	ID_903	1	0	-12.49	-16.11	-20.67
GRMZM2G119623	ID_1177	1	0	-5.85	-12.78	-11.94
GRMZM2G151992	ID_1328	1	0	-3.1	-5.61	-4.66
GRMZM2G152777	ID_1332	1	0	-3.83	-5.76	-7.27
GRMZM2G156472	ID_1350	1	0	-8.67	-20.76	-24.27
GRMZM2G164547	ID_1379	1	0	-13.43	-28.44	-24.23
GRMZM2G169458	ID_1405	1	0	-4.73	-7.18	-6.55
GRMZM2G175406	ID_1425	1	0	-2.58	-4.62	-4.61
GRMZM2G383735	ID_1590	1	0	-12.99	-18.24	-18.24
GRMZM2G388855	ID_1596	1	0	-8.49	-21.05	-19.82
GRMZM2G446213	ID_1663	1	0	-5.47	-8.27	-9.39
GRMZM2G472671	ID_1696	1	0	-11	-19.26	-21.23
GRMZM2G481261	ID_35	0	0	-12.59	-25.91	-39.39
GRMZM2G405385	ID_84	0	0	-4.01	-15.65	-19.38
GRMZM2G149739	ID_234	0	0	-0.59	-1.22	-2.04
GRMZM2G077436	ID_365	0	0	-24.69	-41.58	-56.2
GRMZM2G043147	ID_429	0	0	-1.13	-1.96	-3.06
GRMZM2G021777	ID_469	0	0	-7.77	-26.84	-38.82
GRMZM2G024391	ID_709	0	0	-42.26	-63.23	-80.42
GRMZM2G024668	ID_710	0	0	-21.56	-37.77	-49.84
GRMZM2G094017	ID_1046	0	0	-4.15	-12.2	-21.16
GRMZM2G179518	ID_1443	0	0	-52.11	-79.54	-102.77
GRMZM2G345700	ID_1528	0	0	-19.25	-31.09	-46.73
GRMZM2G376416	ID_1578	0	0	-14.46	-19.24	-25.53
GRMZM2G457929	ID_1687	0	0	-8.1	-13.81	-24.48
GRMZM5G872934	ID_1788	0	0	-1.62	-4.25	-6.48

## Sheet: LHZ4-NIL
gene_id	SPOT	Profile	L3496	L5496	L6496	L7496
GRMZM5G891282	ID_0	18	0	20.87	4.97	-0.93
GRMZM5G886913	ID_1	18	0	11.19	1.33	4.01
GRMZM5G883632	ID_2	18	0	18.42	9.77	6.42
GRMZM5G873295	ID_3	18	0	7.65	1.26	-0.5
GRMZM5G866334	ID_4	18	0	169.7	44.42	-14.34
GRMZM5G836174	ID_20	18	0	2121.92	912.31	-137.85
GRMZM5G832939	ID_22	18	0	779.13	302.47	-43.4
GRMZM5G831843	ID_23	18	0	35.14	-9.22	-19.56
GRMZM5G828488	ID_25	18	0	112.57	20.16	0.24
GRMZM2G563190	ID_34	18	0	2.59	0.41	-0.67
GRMZM2G479000	ID_37	18	0	12.27	0.75	0
GRMZM2G478160	ID_39	18	0	101.74	16.6	-14.45
GRMZM2G477503	ID_40	18	0	158.05	36.9	-4.93
GRMZM2G472696	ID_43	18	0	4.9	-0.96	0.38
GRMZM2G465383	ID_49	18	0	8.03	3.64	0.58
GRMZM2G453805	ID_53	18	0	28.47	-3.78	3.1
GRMZM2G450863	ID_55	18	0	5.79	0.77	0.61
GRMZM2G448834	ID_57	18	0	1.5	-0.01	-0.16
GRMZM2G427054	ID_68	18	0	33.57	-3.13	-1.59
GRMZM2G423898	ID_73	18	0	958.73	122.09	-78.87
GRMZM2G422212	ID_76	18	0	6.27	0.18	-1.5
GRMZM2G420743	ID_78	18	0	7.82	-3.8	-0.29
GRMZM2G420012	ID_79	18	0	14.36	0.92	2.87
GRMZM2G376661	ID_109	18	0	1.09	-0.02	0.09
GRMZM2G371944	ID_112	18	0	16.18	-6.83	1
GRMZM2G366065	ID_114	18	0	10.12	-1.07	-1.22
GRMZM2G365961	ID_115	18	0	2.42	-1.51	0.04
GRMZM2G360821	ID_119	18	0	34.67	10.64	3.42
GRMZM2G355752	ID_125	18	0	16.62	9.16	5.43
GRMZM2G326707	ID_136	18	0	66.43	28.91	20.07
GRMZM2G320606	ID_138	18	0	2.31	0.53	-0.04
GRMZM2G320506	ID_139	18	0	0.73	-0.41	-0.28
GRMZM2G318408	ID_141	18	0	7.43	0.8	-1.74
GRMZM2G318220	ID_142	18	0	7.17	0.47	0.03
GRMZM2G315848	ID_145	18	0	31.73	15.37	3.7
GRMZM2G312736	ID_148	18	0	10.52	3.11	1.41
GRMZM2G312732	ID_149	18	0	69.41	20.23	3.57
GRMZM2G309193	ID_151	18	0	190.53	-146.43	-168.27
GRMZM2G308944	ID_152	18	0	217.37	-57.79	76.33
GRMZM2G304947	ID_153	18	0	426.43	-263.04	-268.56
GRMZM2G179768	ID_158	18	0	3.24	0.83	0.43
GRMZM2G175728	ID_166	18	0	11.14	2.53	-0.26
GRMZM2G171752	ID_175	18	0	21.33	8.64	7.53
GRMZM2G170870	ID_178	18	0	17.29	-12.88	-13.29
GRMZM2G168707	ID_186	18	0	52.53	4.03	-10.25
GRMZM2G166548	ID_191	18	0	2.09	0.47	-0.03
GRMZM2G165272	ID_193	18	0	8.36	-5.17	2.01
GRMZM2G164467	ID_195	18	0	1.52	0.68	0.55
GRMZM2G162737	ID_201	18	0	7.95	2.19	1.83
GRMZM2G162535	ID_204	18	0	70.63	12.83	7.69
GRMZM2G161728	ID_205	18	0	7.64	-4.79	-2.08
GRMZM2G158342	ID_211	18	0	11.29	2.08	0.3
GRMZM2G158175	ID_212	18	0	18.96	6.31	1.12
GRMZM2G157517	ID_213	18	0	38.81	-19.07	-8
GRMZM2G157207	ID_217	18	0	29.44	-4.35	3.81
GRMZM2G154090	ID_227	18	0	19.63	5.91	-2.12
GRMZM2G138429	ID_259	18	0	4.73	-5.1	-2.99
GRMZM2G130959	ID_274	18	0	15.07	-0.76	-1.72
GRMZM2G129453	ID_278	18	0	9.29	3.2	-0.31
GRMZM2G128078	ID_280	18	0	17.22	1.6	-0.86
GRMZM2G126062	ID_282	18	0	7.72	2.26	-0.39
GRMZM2G125838	ID_284	18	0	39.52	13.56	-1.58
GRMZM2G119214	ID_297	18	0	8.2	2.13	1.79
GRMZM2G118951	ID_299	18	0	4.43	0.73	1.08
GRMZM2G118714	ID_301	18	0	3.99	-2.01	-2.8
GRMZM2G118610	ID_302	18	0	60.7	28.9	6.07
GRMZM2G117796	ID_304	18	0	1.62	-1.12	-1.18
GRMZM2G117572	ID_305	18	0	5.69	-0.01	-0.4
GRMZM2G117153	ID_306	18	0	6.45	2.28	3.17
GRMZM2G116517	ID_307	18	0	32.36	6.92	4.45
GRMZM2G116461	ID_308	18	0	20.64	8.2	-1.1
GRMZM2G108467	ID_317	18	0	3.04	-0.83	-0.57
GRMZM2G106748	ID_320	18	0	14.07	6.36	1.21
GRMZM2G093101	ID_339	18	0	19.01	3.53	-0.03
GRMZM2G092363	ID_341	18	0	8.38	2.16	-0.46
GRMZM2G085845	ID_349	18	0	4.24	1.67	0.55
GRMZM2G085381	ID_351	18	0	156.05	67.04	63.68
GRMZM2G085236	ID_352	18	0	4.95	0.62	0.56
GRMZM2G078500	ID_364	18	0	15.6	5.22	8.33
GRMZM2G077316	ID_367	18	0	4.2	0.44	0.94
GRMZM2G076526	ID_368	18	0	11.86	2.63	0.87
GRMZM2G073814	ID_370	18	0	1.11	-0.15	0.04
GRMZM2G072780	ID_374	18	0	1.58	0.71	0.69
GRMZM2G071100	ID_382	18	0	5.11	0.1	-0.23
GRMZM2G070508	ID_383	18	0	3.15	-0.03	-0.59
GRMZM2G065989	ID_391	18	0	929.9	162.08	-33.36
GRMZM2G063723	ID_397	18	0	3.58	-1.47	-0.33
GRMZM2G062197	ID_400	18	0	22.39	4.96	-2.81
GRMZM2G059151	ID_404	18	0	50.63	12.06	-0.5
GRMZM2G055936	ID_409	18	0	324.8	23.97	-53.68
GRMZM2G054032	ID_414	18	0	1.28	0.29	0.22
GRMZM2G053322	ID_416	18	0	359.54	83.43	-53.72
GRMZM2G041899	ID_435	18	0	3.45	1.63	0.77
GRMZM2G038964	ID_441	18	0	15.28	3.99	1.71
GRMZM2G027198	ID_462	18	0	10.38	3.08	3.92
GRMZM2G024705	ID_466	18	0	2.96	-0.01	-0.29
GRMZM2G023840	ID_467	18	0	2.23	0.3	-0.34
GRMZM2G021777	ID_469	18	0	20.98	4.33	4.72
GRMZM2G015908	ID_473	18	0	132.42	48.53	-6.87
GRMZM2G015355	ID_475	18	0	6.52	-0.98	-0.98
GRMZM2G014454	ID_477	18	0	9.42	4.86	1.9
GRMZM2G008714	ID_490	18	0	10.13	4.59	1.36
GRMZM2G008202	ID_493	18	0	12.51	3.6	1.47
AC216353.2_FG005	ID_509	18	0	45225	-5072.6	-6716.3
AC209374.4_FG002	ID_512	18	0	37.74	-3.02	-0.75
AC149810.2_FG004	ID_519	18	0	18.47	1.51	1.77
AC191575.2_FG001	ID_525	18	0	78.65	2.37	-23.31
AC202129.3_FG001	ID_544	18	0	47.77	-3.16	-9.04
AC204502.4_FG006	ID_548	18	0	8.68	1.48	0
AC204611.4_FG001	ID_549	18	0	35.54	10.58	4.13
AC206223.3_FG010	ID_554	18	0	13.3	3.45	1.33
AC208110.2_FG007	ID_557	18	0	135.83	31.11	14.04
AC210168.4_FG003	ID_565	18	0	3.15	-0.01	-0.35
AC232238.2_FG008	ID_578	18	0	3.03	0.62	0.98
AC234160.1_FG003	ID_584	18	0	0.7	-0.42	-0.47
GRMZM2G002568	ID_597	18	0	4.12	0.68	0.77
GRMZM2G003970	ID_602	18	0	86.68	10.76	-14.69
GRMZM2G006704	ID_618	18	0	67.15	-1.28	-8.65
GRMZM2G007256	ID_620	18	0	11.55	5.96	4.47
GRMZM2G007399	ID_621	18	0	17.88	6.55	9.56
GRMZM2G007795	ID_624	18	0	1.22	-1.08	-0.53
GRMZM2G008696	ID_628	18	0	3.41	0.2	-0.11
GRMZM2G011141	ID_639	18	0	2.65	0.54	0.27
GRMZM2G015654	ID_660	18	0	4.54	1.82	0.05
GRMZM2G015892	ID_663	18	0	34.2	15.39	-1.35
GRMZM2G016948	ID_670	18	0	2.44	0.75	0.58
GRMZM2G018275	ID_683	18	0	77.1	31.95	3.88
GRMZM2G018579	ID_685	18	0	21.62	8.68	8.16
GRMZM2G018820	ID_687	18	0	1302.9	216.2	-40.63
GRMZM2G020429	ID_696	18	0	82.31	14.59	-13.23
GRMZM2G021605	ID_698	18	0	7.9	1.46	-0.23
GRMZM2G022402	ID_702	18	0	2.62	-0.37	-0.85
GRMZM2G027392	ID_724	18	0	327.39	20.86	5.87
GRMZM2G030038	ID_729	18	0	2.94	0.83	0.1
GRMZM2G031308	ID_735	18	0	46.35	6.28	-12.47
GRMZM2G033971	ID_744	18	0	88.81	14.84	-0.99
GRMZM2G034417	ID_746	18	0	115.65	21.78	-7.49
GRMZM2G035579	ID_751	18	0	306.67	55	-6.91
GRMZM2G036286	ID_758	18	0	7.66	2.03	1.18
GRMZM2G039949	ID_772	18	0	2.94	-0.52	-0.43
GRMZM2G041127	ID_779	18	0	19.87	10.28	9.33
GRMZM2G042278	ID_784	18	0	1.86	0.62	-0.28
GRMZM2G044629	ID_789	18	0	7.88	-0.67	0.53
GRMZM2G044788	ID_791	18	0	1.99	0.95	0.51
GRMZM2G047995	ID_805	18	0	101.4	28.77	-1.24
GRMZM2G049541	ID_810	18	0	134.64	24.83	3.11
GRMZM2G053319	ID_832	18	0	42.92	3.69	4.22
GRMZM2G053921	ID_836	18	0	5.32	-0.13	1.68
GRMZM2G055151	ID_841	18	0	58.05	-11.48	-20.26
GRMZM2G056355	ID_849	18	0	99.44	9.83	-8.03
GRMZM2G058227	ID_858	18	0	124.79	55.37	1.8
GRMZM2G060311	ID_867	18	0	167.1	42.2	-3.49
GRMZM2G060732	ID_868	18	0	63.8	15.55	3.29
GRMZM2G062218	ID_875	18	0	1.67	0.65	0.58
GRMZM2G062777	ID_880	18	0	3.42	0.12	1.4
GRMZM2G063001	ID_881	18	0	10.77	1.54	-1.26
GRMZM2G064042	ID_884	18	0	40.93	-0.94	0.88
GRMZM2G064096	ID_885	18	0	240.3	37.99	114.52
GRMZM2G064962	ID_890	18	0	92.96	18.59	-10.36
GRMZM2G066291	ID_895	18	0	3.06	-1.4	-1.14
GRMZM2G066528	ID_897	18	0	6.88	-0.68	-0.49
GRMZM2G067036	ID_900	18	0	4.06	-1.21	-1.03
GRMZM2G067520	ID_902	18	0	3.99	0.43	-0.45
GRMZM2G069694	ID_913	18	0	83.99	32	-1.69
GRMZM2G071808	ID_923	18	0	8.68	-2.5	-2.75
GRMZM2G071977	ID_924	18	0	10.24	0.19	-2.1
GRMZM2G072814	ID_927	18	0	20.93	6.49	0.05
GRMZM2G077530	ID_951	18	0	13.39	-2.26	0.27
GRMZM2G078275	ID_955	18	0	6.78	1.56	-0.9
GRMZM2G078472	ID_959	18	0	1.72	0.31	0.11
GRMZM2G079682	ID_967	18	0	6.47	1.83	0.52
GRMZM2G080516	ID_970	18	0	9.23	0.39	2.72
GRMZM2G082149	ID_975	18	0	9.68	2.52	0.98
GRMZM2G082608	ID_979	18	0	28.24	2.49	5.42
GRMZM2G082894	ID_981	18	0	16.72	-1.5	-1.81
GRMZM2G083130	ID_984	18	0	3.14	0.23	-0.54
GRMZM2G083655	ID_989	18	0	103.81	25.37	-4.39
GRMZM2G084547	ID_995	18	0	213.8	15.69	6.93
GRMZM2G084859	ID_998	18	0	11.45	0.43	-3.22
GRMZM2G085705	ID_1004	18	0	4.11	0.18	-0.9
GRMZM2G087662	ID_1010	18	0	9.83	0.23	1.86
GRMZM2G087740	ID_1012	18	0	11.24	2.48	-0.16
GRMZM2G089421	ID_1018	18	0	20.86	-8.07	3.62
GRMZM2G090105	ID_1026	18	0	14.43	3.8	3.78
GRMZM2G090172	ID_1027	18	0	30.71	5.42	1.87
GRMZM2G090865	ID_1030	18	0	16.39	-9.69	0.83
GRMZM2G091435	ID_1034	18	0	35.11	5.44	-3.05
GRMZM2G091597	ID_1038	18	0	21.81	6.91	0.21
GRMZM2G092758	ID_1042	18	0	28.03	1.96	3.67
GRMZM2G096358	ID_1052	18	0	1.07	-0.81	-0.61
GRMZM2G096753	ID_1054	18	0	51.41	9.15	-0.05
GRMZM2G098667	ID_1060	18	0	5.37	0.1	-1.18
GRMZM2G098793	ID_1061	18	0	5.98	1.81	-0.16
GRMZM2G099052	ID_1062	18	0	19.17	2.74	-5.08
GRMZM2G100454	ID_1068	18	0	74.26	14.55	-0.39
GRMZM2G100467	ID_1069	18	0	7.74	-2.84	-2.73
GRMZM2G102238	ID_1074	18	0	68.48	9.81	2.2
GRMZM2G103281	ID_1083	18	0	13.53	3.15	0.43
GRMZM2G103873	ID_1087	18	0	8.45	0.69	1.51
GRMZM2G104012	ID_1088	18	0	5.63	0.04	1.35
GRMZM2G105775	ID_1096	18	0	35.3	11.87	1.21
GRMZM2G106950	ID_1102	18	0	9.28	0.87	0.83
GRMZM2G107629	ID_1106	18	0	9.85	-1.53	-3.59
GRMZM2G109286	ID_1115	18	0	5.72	0.9	-0.13
GRMZM2G109388	ID_1117	18	0	2.05	0.33	0.38
GRMZM2G109550	ID_1120	18	0	1.62	0.3	0.45
GRMZM2G110681	ID_1128	18	0	20.05	-4.32	-4.39
GRMZM2G110997	ID_1130	18	0	17.91	-2.67	-0.35
GRMZM2G111987	ID_1134	18	0	10.75	3.09	3.37
GRMZM2G112247	ID_1135	18	0	40.61	9.61	-0.59
GRMZM2G113351	ID_1140	18	0	9.18	3.16	0.26
GRMZM2G114578	ID_1147	18	0	9.1	0.89	-0.08
GRMZM2G114801	ID_1149	18	0	21.4	8.52	-0.09
GRMZM2G115476	ID_1152	18	0	7.93	-0.51	-1.93
GRMZM2G116671	ID_1157	18	0	6.89	-1.18	2.59
GRMZM2G117993	ID_1167	18	0	18.23	-0.39	0.95
GRMZM2G121166	ID_1184	18	0	25.01	3.65	-0.79
GRMZM2G121223	ID_1185	18	0	12.76	4.03	-0.51
GRMZM2G121948	ID_1191	18	0	41.51	9.98	-0.36
GRMZM2G122108	ID_1192	18	0	51.03	6.05	-0.67
GRMZM2G125001	ID_1204	18	0	25.45	7.62	0.34
GRMZM2G125266	ID_1205	18	0	42.85	19.44	9.49
GRMZM2G125522	ID_1208	18	0	11.01	1.19	-2.34
GRMZM2G127386	ID_1220	18	0	10.08	-3.68	-1.48
GRMZM2G128651	ID_1227	18	0	1.23	0.13	0
GRMZM2G128922	ID_1228	18	0	21.58	6.11	6.11
GRMZM2G130149	ID_1233	18	0	10.65	-11.44	-5.72
GRMZM2G130728	ID_1235	18	0	1.23	0.19	-0.09
GRMZM2G132093	ID_1244	18	0	10.54	2.07	4.76
GRMZM2G132095	ID_1245	18	0	9.65	2.71	2.96
GRMZM2G134430	ID_1254	18	0	7.52	-0.6	0.1
GRMZM2G135091	ID_1255	18	0	6.97	1.06	2.21
GRMZM2G135586	ID_1256	18	0	170.92	54.49	-4.94
GRMZM2G135839	ID_1258	18	0	37.97	12.6	-2.78
GRMZM2G138756	ID_1274	18	0	6.98	0.46	-0.18
GRMZM2G138809	ID_1275	18	0	19.12	1.85	3.02
GRMZM2G141665	ID_1284	18	0	32.81	5.09	3.54
GRMZM2G141731	ID_1285	18	0	75.87	25.55	3.48
GRMZM2G144034	ID_1291	18	0	33.36	12.92	1.13
GRMZM2G147221	ID_1303	18	0	57.45	-1.38	-4.52
GRMZM2G149414	ID_1314	18	0	23.1	1.8	6.2
GRMZM2G149534	ID_1315	18	0	5.92	-2.51	-1.43
GRMZM2G150187	ID_1321	18	0	7.49	1.44	2.32
GRMZM2G152447	ID_1330	18	0	671.07	150.91	-5.76
GRMZM2G152549	ID_1331	18	0	8.26	3.92	1.92
GRMZM2G154344	ID_1339	18	0	38.69	-10.07	1.5
GRMZM2G156150	ID_1349	18	0	11.72	3.04	-0.34
GRMZM2G158304	ID_1357	18	0	30.89	2.71	-0.57
GRMZM2G159500	ID_1361	18	0	20.31	6.47	9.86
GRMZM2G160990	ID_1365	18	0	10.12	4.07	1.36
GRMZM2G161274	ID_1366	18	0	10.88	0.42	2.17
GRMZM2G161658	ID_1368	18	0	9.07	-1.22	3.43
GRMZM2G163546	ID_1376	18	0	5.28	1.06	0.72
GRMZM2G164883	ID_1382	18	0	4.88	0.44	0
GRMZM2G165488	ID_1389	18	0	1.56	0.05	-0.24
GRMZM2G166906	ID_1395	18	0	5.7	1.5	-0.68
GRMZM2G167594	ID_1397	18	0	33.45	1.23	-6.06
GRMZM2G168190	ID_1399	18	0	1.89	0.28	0.81
GRMZM2G169064	ID_1403	18	0	61.98	9.58	9.06
GRMZM2G169391	ID_1404	18	0	18.75	3.85	7.1
GRMZM2G169562	ID_1406	18	0	10.59	2.62	0.43
GRMZM2G170552	ID_1407	18	0	1.55	0.16	0.09
GRMZM2G171423	ID_1412	18	0	227.23	26.43	2.95
GRMZM2G171452	ID_1413	18	0	4.56	-2.66	-0.95
GRMZM2G171569	ID_1414	18	0	63.43	13.76	0.94
GRMZM2G173882	ID_1419	18	0	29.97	5.42	-0.47
GRMZM2G177203	ID_1431	18	0	36.45	6.65	-0.63
GRMZM2G178787	ID_1437	18	0	11.48	0.42	2.05
GRMZM2G178887	ID_1439	18	0	3.89	1.52	-0.28
GRMZM2G178892	ID_1440	18	0	14.23	1.98	0.52
GRMZM2G304700	ID_1457	18	0	57.24	16.33	-0.15
GRMZM2G311347	ID_1466	18	0	1.27	0	0.02
GRMZM2G314667	ID_1468	18	0	1.97	-0.49	-0.15
GRMZM2G314769	ID_1469	18	0	4.8	2.22	0.74
GRMZM2G316789	ID_1474	18	0	3.79	1.13	0
GRMZM2G319057	ID_1477	18	0	38.11	-2.45	-2.65
GRMZM2G320152	ID_1480	18	0	15.77	1.5	-2.08
GRMZM2G324903	ID_1488	18	0	6.19	1.27	3.19
GRMZM2G326734	ID_1495	18	0	30.41	6.35	0.27
GRMZM2G332838	ID_1507	18	0	29.51	-33.07	-4.59
GRMZM2G333183	ID_1508	18	0	8.82	2.57	0.05
GRMZM2G339091	ID_1517	18	0	85.3	7.39	0.64
GRMZM2G344388	ID_1526	18	0	11.62	4.74	1.54
GRMZM2G345991	ID_1529	18	0	1.65	-0.12	-0.65
GRMZM2G346757	ID_1531	18	0	94.3	6.31	-19.25
GRMZM2G355773	ID_1544	18	0	100.22	14.72	2.74
GRMZM2G356128	ID_1545	18	0	2.87	1.03	-0.17
GRMZM2G358161	ID_1549	18	0	2.11	-0.21	0.03
GRMZM2G358931	ID_1551	18	0	8.43	2.91	-0.7
GRMZM2G361855	ID_1556	18	0	8.16	3.63	0.28
GRMZM2G363554	ID_1559	18	0	61.2	32.64	21.5
GRMZM2G364208	ID_1560	18	0	5.78	-0.01	-0.83
GRMZM2G366607	ID_1564	18	0	24.6	7.17	1.3
GRMZM2G368662	ID_1565	18	0	2.18	0.59	0.36
GRMZM2G373607	ID_1571	18	0	49.74	15.75	-2.09
GRMZM2G375197	ID_1575	18	0	9.49	2.18	1.85
GRMZM2G378547	ID_1581	18	0	1.02	0.26	0.29
GRMZM2G385428	ID_1591	18	0	5.18	1.37	0.04
GRMZM2G411764	ID_1611	18	0	7.67	-1.91	0.86
GRMZM2G418031	ID_1621	18	0	8.68	2.29	0
GRMZM2G425728	ID_1628	18	0	8.05	2.8	2.45
GRMZM2G425965	ID_1629	18	0	2.2	0.56	0.9
GRMZM2G426922	ID_1630	18	0	55.49	15.76	-0.26
GRMZM2G436295	ID_1643	18	0	533.12	114.96	3.78
GRMZM2G436533	ID_1644	18	0	5.92	-0.4	-1.64
GRMZM2G443525	ID_1656	18	0	30.41	8.09	4.58
GRMZM2G447984	ID_1666	18	0	3.12	1.47	1.32
GRMZM2G448344	ID_1668	18	0	17.46	-1.67	-6.72
GRMZM2G455828	ID_1684	18	0	26.31	-15.95	3.83
GRMZM2G463640	ID_1690	18	0	183.65	3.43	-25.66
GRMZM2G475536	ID_1706	18	0	118.52	54.37	-2.02
GRMZM2G493903	ID_1720	18	0	881.78	-490.63	-493.32
GRMZM2G536768	ID_1726	18	0	3.26	-1.8	-1.93
GRMZM2G544510	ID_1727	18	0	7.99	0.85	-0.49
GRMZM2G560551	ID_1733	18	0	513.65	40.32	-69.21
GRMZM2G573667	ID_1735	18	0	2.99	-0.4	0.23
GRMZM2G700291	ID_1739	18	0	2.51	0.01	0.66
GRMZM2G701058	ID_1741	18	0	30.67	6.47	-0.19
GRMZM5G805732	ID_1749	18	0	2.2	-0.11	-0.75
GRMZM5G806784	ID_1751	18	0	1.44	-0.71	-0.33
GRMZM5G809335	ID_1752	18	0	23.61	0.84	2.7
GRMZM5G813783	ID_1754	18	0	29.83	-15.96	-13.87
GRMZM5G823004	ID_1759	18	0	11.35	-1.77	2.89
GRMZM5G829554	ID_1764	18	0	4.84	-2.55	-1.69
GRMZM5G829946	ID_1765	18	0	78.86	29.87	3.11
GRMZM5G842886	ID_1775	18	0	13.05	3.16	0.28
GRMZM5G891967	ID_1802	18	0	1.8	0.13	-0.27
GRMZM5G856929	ID_8	0	0	-1.37	-2.26	-4.01
GRMZM5G803565	ID_29	0	0	-10.6	-16.71	-31
GRMZM2G154223	ID_226	0	0	-70.96	-92.77	-130.12
GRMZM2G123719	ID_287	0	0	-22.4	-36.65	-63.5
GRMZM2G117971	ID_303	0	0	-4.84	-9.64	-11.99
GRMZM2G099036	ID_333	0	0	-23.92	-40.87	-64.74
GRMZM2G065012	ID_395	0	0	-0.42	-0.81	-1.44
GRMZM2G062396	ID_399	0	0	-0.77	-1.65	-3.13
GRMZM2G045286	ID_427	0	0	-1.32	-2.06	-3.12
GRMZM2G032478	ID_453	0	0	-20.86	-35.49	-58.81
GRMZM2G025832	ID_464	0	0	-6.99	-14.87	-23.89
GRMZM2G014395	ID_478	0	0	-5.51	-10.32	-15.43
AC203985.4_FG001	ID_546	0	0	-1.54	-2.37	-4.36
AC215260.3_FG001	ID_573	0	0	-1.85	-4.07	-7.28
GRMZM2G004483	ID_606	0	0	-5.37	-11.99	-23.18
GRMZM2G010868	ID_636	0	0	-36.35	-48.98	-70.26
GRMZM2G011269	ID_642	0	0	-31.25	-60.9	-134.38
GRMZM2G017351	ID_674	0	0	-27.83	-38.06	-56.08
GRMZM2G024391	ID_709	0	0	-27.37	-43.59	-83.55
GRMZM2G026889	ID_721	0	0	-0.24	-0.74	-1.17
GRMZM2G043500	ID_786	0	0	-6.31	-19.22	-24.58
GRMZM2G050364	ID_817	0	0	-1.96	-3.45	-5.91
GRMZM2G082034	ID_974	0	0	-20.4	-31.54	-46.03
GRMZM2G086269	ID_1007	0	0	-3.73	-5.48	-7.28
GRMZM2G113480	ID_1142	0	0	-47.03	-112.51	-150.79
GRMZM2G116327	ID_1156	0	0	-4.84	-8.47	-14.68
GRMZM2G124540	ID_1201	0	0	-0.9	-2.84	-3.99
GRMZM2G129482	ID_1231	0	0	-4.42	-12.84	-19.09
GRMZM2G131165	ID_1239	0	0	-12.19	-22.78	-34.87
GRMZM2G141026	ID_1280	0	0	-2.33	-4.58	-9.44
GRMZM2G148621	ID_1309	0	0	-11	-27.67	-37.55
GRMZM2G166218	ID_1392	0	0	-2.06	-3.82	-5.23
GRMZM2G179133	ID_1442	0	0	-4.66	-7.05	-11.42
GRMZM2G338809	ID_1516	0	0	-0.87	-1.8	-2.57
GRMZM2G347708	ID_1535	0	0	-11.83	-18.85	-26.72
GRMZM2G438871	ID_1648	0	0	-1.85	-6.4	-7.95
GRMZM2G455809	ID_1683	0	0	-2.88	-4.96	-9.86
GRMZM2G474546	ID_1701	0	0	-16.69	-29.25	-45.31
GRMZM2G549568	ID_1729	0	0	-7.05	-12.42	-18.35
GRMZM5G835235	ID_1769	0	0	-80.06	-166.62	-234.79
GRMZM2G425863	ID_70	17	0	9.31	-0.65	-4.7
GRMZM2G422671	ID_74	17	0	2.9	1.07	-0.69
GRMZM2G397055	ID_90	17	0	2.32	-2.29	-4.82
GRMZM2G374263	ID_110	17	0	51.44	-18.38	-36.36
GRMZM2G160327	ID_206	17	0	1.07	0.51	-0.66
GRMZM2G154881	ID_222	17	0	38.3	16.64	-19.72
GRMZM2G149317	ID_238	17	0	22.6	-21.34	-54.41
GRMZM2G146616	ID_243	17	0	6.02	0.74	-2.25
GRMZM2G144730	ID_247	17	0	18.15	7.48	-5.99
GRMZM2G134054	ID_270	17	0	31.55	13.53	-4.33
GRMZM2G133428	ID_271	17	0	22.97	11.65	-6.3
GRMZM2G114588	ID_310	17	0	14.95	-7.61	-15.94
GRMZM2G106945	ID_319	17	0	2.04	-0.28	-4.03
GRMZM2G100158	ID_330	17	0	10.23	-1.08	-5.39
GRMZM2G089528	ID_344	17	0	19.09	6.78	-3.21
GRMZM2G081577	ID_356	17	0	4.4	0.69	-4.43
GRMZM2G055704	ID_410	17	0	7.66	-0.08	-4.99
GRMZM2G054123	ID_412	17	0	18.35	6.47	-9.54
GRMZM2G029546	ID_456	17	0	25.44	14.3	-35.4
GRMZM2G011025	ID_486	17	0	3.73	1.67	-0.72
GRMZM2G000219	ID_502	17	0	28.57	10.24	-32.3
AC213521.3_FG005	ID_510	17	0	41.57	13.28	-8.5
AC234154.1_FG008	ID_581	17	0	4.75	-0.32	-3.01
GRMZM2G000489	ID_591	17	0	5.23	0.62	-2.68
GRMZM2G004352	ID_605	17	0	21.36	3.5	-17.8
GRMZM2G017532	ID_677	17	0	11.94	-0.54	-16.52
GRMZM2G021973	ID_700	17	0	16.02	8.59	-5.08
GRMZM2G027478	ID_725	17	0	134.62	42.33	-244.76
GRMZM2G032028	ID_740	17	0	24.66	3.82	-15.72
GRMZM2G032107	ID_741	17	0	30.27	-13.24	-21.2
GRMZM2G035790	ID_753	17	0	4.23	2.46	-6.63
GRMZM2G035994	ID_756	17	0	2.3	1.06	-0.29
GRMZM2G039797	ID_771	17	0	45.59	-1.41	-18.39
GRMZM2G040033	ID_774	17	0	1.98	-0.05	-1.23
GRMZM2G044498	ID_788	17	0	11.14	1.55	-19.95
GRMZM2G069203	ID_910	17	0	30.25	0.92	-35.71
GRMZM2G101754	ID_1073	17	0	1.08	-0.18	-0.63
GRMZM2G104942	ID_1092	17	0	112.65	14.11	-52.54
GRMZM2G106165	ID_1099	17	0	8.86	-0.71	-5.45
GRMZM2G107388	ID_1105	17	0	6.4	-6.92	-10.54
GRMZM2G108847	ID_1113	17	0	15.66	-5.32	-12.02
GRMZM2G111455	ID_1132	17	0	8.04	3.31	-3.4
GRMZM2G117410	ID_1162	17	0	1.87	0.89	-0.4
GRMZM2G117823	ID_1166	17	0	1.91	0.88	-0.38
GRMZM2G118312	ID_1170	17	0	12.05	-9.45	-21.84
GRMZM2G119300	ID_1174	17	0	34.25	-18.07	-35.2
GRMZM2G125704	ID_1212	17	0	10.81	4.66	-1.1
GRMZM2G132069	ID_1243	17	0	16.05	7.25	-4.09
GRMZM2G150098	ID_1320	17	0	1.27	-0.14	-1.31
GRMZM2G151227	ID_1323	17	0	3.9	-4.09	-6.07
GRMZM2G154509	ID_1341	17	0	1.24	0.19	-1.49
GRMZM2G155329	ID_1348	17	0	9.64	-6.54	-9.8
GRMZM2G156472	ID_1350	17	0	7.48	-2.69	-14.36
GRMZM2G161696	ID_1369	17	0	1.82	-1.21	-2.66
GRMZM2G162359	ID_1371	17	0	2.73	-1.47	-2.76
GRMZM2G162755	ID_1374	17	0	11.76	-2.32	-11.26
GRMZM2G166976	ID_1396	17	0	49.83	13.12	-12.63
GRMZM2G170982	ID_1410	17	0	2.49	-1.88	-3.21
GRMZM2G178025	ID_1434	17	0	4.29	1.41	-1.62
GRMZM2G179518	ID_1443	17	0	25.83	3.91	-13.55
GRMZM2G303044	ID_1456	17	0	8.43	-4.68	-6.93
GRMZM2G304712	ID_1458	17	0	6.74	-2.76	-16.41
GRMZM2G319781	ID_1478	17	0	6.17	-0.7	-8.44
GRMZM2G326270	ID_1493	17	0	131.53	-15.62	-190.74
GRMZM2G342401	ID_1522	17	0	24.4	15.96	-14.69
GRMZM2G349791	ID_1537	17	0	15.48	-8.73	-13.61
GRMZM2G356714	ID_1546	17	0	1.03	0.2	-0.26
GRMZM2G371313	ID_1569	17	0	8.7	-7.02	-21.8
GRMZM2G378852	ID_1582	17	0	3.32	0.11	-2.46
GRMZM2G379540	ID_1584	17	0	2.85	0.58	-1.47
GRMZM2G394968	ID_1598	17	0	11.21	-1.99	-26.37
GRMZM2G402631	ID_1602	17	0	23.25	1.98	-8.86
GRMZM2G406014	ID_1608	17	0	2.35	-0.4	-2.1
GRMZM2G413717	ID_1614	17	0	146.02	72	-37.25
GRMZM2G431039	ID_1638	17	0	5.14	0.24	-2.28
GRMZM2G443668	ID_1657	17	0	41.18	4.12	-15.87
GRMZM2G455306	ID_1680	17	0	3.16	0.07	-1.15
GRMZM2G475293	ID_1704	17	0	46.47	7.86	-44.23
GRMZM5G803308	ID_1745	17	0	1.02	-0.14	-0.67
GRMZM5G803874	ID_1746	17	0	33.5	-3.67	-22.41
GRMZM5G839794	ID_1771	17	0	16.81	4.64	-4.58
GRMZM5G889052	ID_1798	17	0	1.33	0.74	-0.48
GRMZM5G897776	ID_1808	17	0	89.65	1.88	-62.22
GRMZM2G467338	ID_47	8	0	-11.55	-1.38	9.16
GRMZM2G451314	ID_54	8	0	-12.52	-2.47	20.11
GRMZM2G406830	ID_83	8	0	-1.44	-0.96	1.41
GRMZM2G387594	ID_103	8	0	-2.6	-1.14	2.92
GRMZM2G379005	ID_108	8	0	-2.13	0.43	6.18
GRMZM2G348452	ID_127	8	0	-15.15	-4.55	8.88
GRMZM2G343974	ID_131	8	0	-8.41	-2.46	1.76
GRMZM2G337242	ID_134	8	0	-7.56	0.25	7.71
GRMZM2G179941	ID_157	8	0	-19.43	-11.3	28.42
GRMZM2G176197	ID_163	8	0	-0.75	-0.06	0.79
GRMZM2G170400	ID_179	8	0	-6.99	-3.74	6.61
GRMZM2G169593	ID_181	8	0	-1.68	-0.44	1.4
GRMZM2G162688	ID_202	8	0	-8	-3.8	12.11
GRMZM2G150004	ID_233	8	0	-0.45	0.26	1.37
GRMZM2G144956	ID_246	8	0	-12	5.68	17.45
GRMZM2G119941	ID_293	8	0	-2.36	-0.96	1.54
GRMZM2G094051	ID_338	8	0	-14.41	-3.77	5.28
GRMZM2G080767	ID_359	8	0	-3.14	-0.97	2.31
GRMZM2G044143	ID_428	8	0	-1.44	-0.43	0.49
GRMZM2G031938	ID_454	8	0	-11.11	-1.55	10.1
GRMZM2G018241	ID_471	8	0	-0.74	-0.36	0.52
GRMZM2G009232	ID_489	8	0	-32.39	18.55	32.01
GRMZM2G005552	ID_494	8	0	-16.88	-2.1	31.15
AC196475.3_FG004	ID_532	8	0	-10.8	-3.79	3.51
AC199198.3_FG003	ID_539	8	0	-11.64	-5.55	15.12
AC199526.5_FG002	ID_541	8	0	-27.16	-8.26	30.23
AC205057.3_FG004	ID_550	8	0	-2.21	0.31	4.46
AC211737.3_FG012	ID_568	8	0	-8.61	2.86	10.93
GRMZM2G019183	ID_688	8	0	-4.5	-2.78	3.75
GRMZM2G021514	ID_697	8	0	-1.17	-0.29	0.83
GRMZM2G031326	ID_737	8	0	-0.83	0.11	1.07
GRMZM2G046155	ID_798	8	0	-5.56	-2.02	2.17
GRMZM2G049913	ID_813	8	0	-8.72	-1.19	11.74
GRMZM2G052178	ID_826	8	0	-1.62	0.77	2.88
GRMZM2G054115	ID_837	8	0	-15.11	-3.14	27.54
GRMZM2G074454	ID_936	8	0	-3.8	-2.06	4.88
GRMZM2G077488	ID_950	8	0	-6.95	1.29	6.66
GRMZM2G081538	ID_972	8	0	-5.16	-1.37	8.13
GRMZM2G082683	ID_980	8	0	-2.91	0.64	2.19
GRMZM2G085295	ID_1000	8	0	-9.83	-3.13	5.19
GRMZM2G085909	ID_1006	8	0	-2.21	-0.42	1.04
GRMZM2G089676	ID_1022	8	0	-3.24	-1.44	0.45
GRMZM2G094666	ID_1047	8	0	-2.77	2.09	3.28
GRMZM2G095905	ID_1050	8	0	-2.32	-0.98	0.61
GRMZM2G108741	ID_1112	8	0	-2.52	0.65	1.9
GRMZM2G125529	ID_1209	8	0	-6.64	1.78	18.47
GRMZM2G131912	ID_1242	8	0	-2.69	-1.18	0.57
GRMZM2G145816	ID_1299	8	0	-0.69	-0.11	0.71
GRMZM2G151992	ID_1328	8	0	-3.37	2.52	3.77
GRMZM2G159388	ID_1360	8	0	-6.99	-2.6	8.32
GRMZM2G162282	ID_1370	8	0	-33.82	-10.45	28.46
GRMZM2G162527	ID_1373	8	0	-33.94	26.94	93.46
GRMZM2G164547	ID_1379	8	0	-11.08	-3.28	11.33
GRMZM2G166603	ID_1393	8	0	-2.05	-1.1	2.8
GRMZM2G171116	ID_1411	8	0	-9.58	1.58	5.62
GRMZM2G178254	ID_1435	8	0	-6.26	1.67	6.23
GRMZM2G310947	ID_1465	8	0	-2.74	1.12	2.58
GRMZM2G329306	ID_1501	8	0	-1.72	-0.69	1.62
GRMZM2G345622	ID_1527	8	0	-2.45	0.45	6.06
GRMZM2G360626	ID_1554	8	0	-1.03	0.32	1.09
GRMZM2G380777	ID_1588	8	0	-3.22	-0.48	7.18
GRMZM2G394203	ID_1597	8	0	-0.96	-0.33	1.02
GRMZM2G413943	ID_1615	8	0	-3.02	1.37	7.11
GRMZM2G415215	ID_1619	8	0	-1.46	-0.55	0.54
GRMZM2G428216	ID_1631	8	0	-35.75	18.2	43.64
GRMZM2G442057	ID_1653	8	0	-6.11	-2.1	2.55
GRMZM2G444623	ID_1660	8	0	-85.59	-41.6	68.94
GRMZM2G449552	ID_1670	8	0	-7.81	-3.71	3.06
GRMZM2G458084	ID_1688	8	0	-0.76	-0.11	1.6
GRMZM2G475349	ID_1705	8	0	-8.99	-2.85	3.91
GRMZM2G479112	ID_1712	8	0	-1.16	0.48	3.09
GRMZM5G814271	ID_1755	8	0	-29.83	11.04	78.13
GRMZM5G842219	ID_1774	8	0	-1.56	-0.42	2.12
GRMZM5G852533	ID_1779	8	0	-2.22	0.26	1.99
GRMZM5G890438	ID_1800	8	0	-0.85	-0.57	0.75
GRMZM5G896114	ID_1807	8	0	-1.01	0.04	1.96
GRMZM5G825090	ID_26	9	0	0.82	-4.21	-6.46
GRMZM5G810061	ID_27	9	0	-15.65	-71.38	-136.86
GRMZM5G807064	ID_28	9	0	-0.3	-5.38	-8.64
GRMZM2G481261	ID_35	9	0	-0.64	-18.9	-40.76
GRMZM2G424832	ID_72	9	0	-0.11	-1.2	-2.25
GRMZM2G393436	ID_96	9	0	2.05	-4.72	-8.04
GRMZM2G169654	ID_180	9	0	0.42	-4.82	-8.17
GRMZM2G144997	ID_245	9	0	0.27	-1.72	-4.61
GRMZM2G140033	ID_253	9	0	-2.88	-4.77	-14.07
GRMZM2G139467	ID_256	9	0	3.17	-8.07	-17.33
GRMZM2G034110	ID_450	9	0	-1.47	-9.15	-19.95
GRMZM2G012269	ID_647	9	0	0.24	-0.71	-1.07
GRMZM2G017249	ID_673	9	0	-10.69	-43.29	-134.67
GRMZM2G019974	ID_692	9	0	0.37	-0.31	-1.5
GRMZM2G056116	ID_848	9	0	-1.83	-8.7	-22.45
GRMZM2G058081	ID_857	9	0	-2.4	-7.2	-15.26
GRMZM2G062488	ID_877	9	0	0.98	-10.55	-15.8
GRMZM2G066636	ID_898	9	0	14.66	-43.53	-104.86
GRMZM2G078409	ID_958	9	0	0.77	-7.75	-18.58
GRMZM2G079559	ID_966	9	0	-9.61	-28.72	-78.18
GRMZM2G094017	ID_1046	9	0	1.36	-3.11	-5.58
GRMZM2G102365	ID_1075	9	0	-1.91	-9.76	-19.44
GRMZM2G110309	ID_1124	9	0	0.43	-13.19	-30.7
GRMZM2G113052	ID_1138	9	0	3.1	-7.19	-14.16
GRMZM2G118104	ID_1168	9	0	3.89	-16.99	-34.51
GRMZM2G118183	ID_1169	9	0	-0.13	-1.37	-2.27
GRMZM2G121494	ID_1187	9	0	52.7	-54.09	-125.07
GRMZM2G130366	ID_1234	9	0	-0.85	-4.49	-6.65
GRMZM2G131087	ID_1238	9	0	3.28	-36.22	-63.34
GRMZM2G137120	ID_1262	9	0	0.52	-7.7	-12.68
GRMZM2G359786	ID_1552	9	0	0.24	-0.58	-1.22
GRMZM2G414844	ID_1618	9	0	0.92	-1.79	-4.47
GRMZM2G465226	ID_1691	9	0	1.53	-18.42	-26.16
GRMZM5G819464	ID_1758	9	0	0.8	-1.49	-3.25
GRMZM5G843302	ID_1776	9	0	29.95	-30.57	-69.96
GRMZM5G878073	ID_1794	9	0	-0.07	-2.52	-4.17
GRMZM5G848138	ID_15	13	0	0.14	0.11	12.1
GRMZM5G847462	ID_16	13	0	-9.48	-7.58	29.69
GRMZM5G800586	ID_31	13	0	10.84	11.28	84.71
GRMZM2G415007	ID_81	13	0	-5.22	-2.47	17.08
GRMZM2G405385	ID_84	13	0	0.4	2.25	9.42
GRMZM2G389173	ID_101	13	0	2.8	-1.84	13.65
GRMZM2G387360	ID_104	13	0	-0.37	-12.71	38.26
GRMZM2G361605	ID_118	13	0	0.43	1.09	4.74
GRMZM2G358059	ID_121	13	0	-2.06	-4.81	15.51
GRMZM2G343149	ID_132	13	0	-19.36	-20.83	62.21
GRMZM2G341404	ID_133	13	0	1.16	-0.43	5.15
GRMZM2G316256	ID_144	13	0	-0.61	0.21	5.63
GRMZM2G312997	ID_147	13	0	0.63	0.38	1.89
GRMZM2G176307	ID_162	13	0	0.19	0.72	5.12
GRMZM2G175447	ID_168	13	0	-5.27	-1.16	41.15
GRMZM2G171139	ID_177	13	0	0.24	0.42	4.55
GRMZM2G168364	ID_187	13	0	0.49	-1.8	5.96
GRMZM2G164341	ID_196	13	0	0.65	0.5	2.86
GRMZM2G160005	ID_207	13	0	-0.15	0.38	3.67
GRMZM2G159481	ID_208	13	0	-8.2	-8.5	16.66
GRMZM2G150697	ID_232	13	0	-2.53	-0.72	9.79
GRMZM2G149739	ID_234	13	0	-0.82	-1.17	1.56
GRMZM2G149714	ID_235	13	0	0.22	0.18	7.41
GRMZM2G149535	ID_237	13	0	0.85	0.17	23.13
GRMZM2G146847	ID_242	13	0	12.59	-1.47	32.07
GRMZM2G142345	ID_249	13	0	1.5	0.91	13.23
GRMZM2G141931	ID_250	13	0	-9.5	-11.47	49.53
GRMZM2G140994	ID_251	13	0	0.69	-1.11	4.12
GRMZM2G139600	ID_254	13	0	-1.14	-0.62	3.66
GRMZM2G138750	ID_257	13	0	-0.34	-0.32	4.17
GRMZM2G137864	ID_260	13	0	4.6	4.73	47.52
GRMZM2G134668	ID_266	13	0	0.71	-8.32	44.02
GRMZM2G134476	ID_267	13	0	7.67	0.14	19.79
GRMZM2G134130	ID_269	13	0	40.19	56.83	251.39
GRMZM2G133400	ID_272	13	0	3.88	-5.32	17.72
GRMZM2G128577	ID_279	13	0	0.59	0.91	7.56
GRMZM2G125072	ID_285	13	0	-33.24	-33.5	115.32
GRMZM2G123212	ID_289	13	0	3.56	1.47	29.03
GRMZM2G122479	ID_290	13	0	-1.65	-1.97	9.53
GRMZM2G119316	ID_295	13	0	3.83	-4.72	15.07
GRMZM2G119209	ID_298	13	0	-2.88	-2.59	4.73
GRMZM2G118821	ID_300	13	0	0.27	0.22	3.7
GRMZM2G107984	ID_318	13	0	5.2	0.61	20.4
GRMZM2G106588	ID_321	13	0	-2.73	1.89	21.58
GRMZM2G105400	ID_325	13	0	-1.5	-0.94	5.7
GRMZM2G094353	ID_337	13	0	0.32	8.19	40.64
GRMZM2G085661	ID_350	13	0	2.38	0.05	5.38
GRMZM2G078995	ID_363	13	0	-0.38	-0.31	1.96
GRMZM2G072855	ID_373	13	0	3.35	0.45	12.22
GRMZM2G071705	ID_377	13	0	-0.06	-0.41	0.84
GRMZM2G070475	ID_384	13	0	0.94	2.54	10.43
GRMZM2G064708	ID_396	13	0	0.57	-0.13	3.15
GRMZM2G060561	ID_403	13	0	0.37	0.92	5.26
GRMZM2G048549	ID_422	13	0	1.13	0.28	3.25
GRMZM2G039886	ID_440	13	0	5.55	-7.25	20.69
GRMZM2G038108	ID_443	13	0	1.44	0.82	4.73
GRMZM2G028665	ID_457	13	0	-25.55	-28.19	79.21
GRMZM2G028438	ID_459	13	0	-0.58	-0.52	0.94
GRMZM2G023786	ID_468	13	0	0.67	3.93	17.82
GRMZM2G019443	ID_470	13	0	0.53	0.5	14.03
GRMZM2G014580	ID_476	13	0	0.63	1.31	6.65
GRMZM2G003138	ID_498	13	0	0.04	0.74	8.4
GRMZM2G002178	ID_500	13	0	1	4.46	59.72
AC217358.3_FG005	ID_508	13	0	-4.15	-3.38	15.93
AC208204.3_FG006	ID_558	13	0	16.79	41.86	208.78
AC209784.3_FG007	ID_561	13	0	7.87	13.86	44.38
AC211744.4_FG001	ID_569	13	0	-1.78	-0.03	35.77
GRMZM2G003306	ID_599	13	0	12.76	-16.61	45.27
GRMZM2G006287	ID_613	13	0	-6.98	-6	22.89
GRMZM2G006293	ID_614	13	0	-1.32	-1.02	3.35
GRMZM2G007729	ID_623	13	0	25.08	28.34	102.63
GRMZM2G008789	ID_630	13	0	-2.55	-2.32	16
GRMZM2G009958	ID_632	13	0	-5.23	-16.05	60.46
GRMZM2G010944	ID_638	13	0	-3.09	-0.3	13.35
GRMZM2G012176	ID_645	13	0	0.16	0.05	2.9
GRMZM2G012455	ID_648	13	0	5.15	4.01	26.94
GRMZM2G013588	ID_649	13	0	-4.82	-5.1	25.27
GRMZM2G015432	ID_659	13	0	-10.55	-9.92	17.96
GRMZM2G015727	ID_662	13	0	-0.63	-0.55	3.85
GRMZM2G016462	ID_666	13	0	2.77	4.23	19.7
GRMZM2G016756	ID_669	13	0	2.56	7.78	35.91
GRMZM2G017186	ID_671	13	0	2.72	10.68	86.76
GRMZM2G017355	ID_675	13	0	-0.97	-0.53	8.38
GRMZM2G018375	ID_684	13	0	329.49	127.45	1253.07
GRMZM2G019356	ID_689	13	0	0.29	0.09	5.16
GRMZM2G019746	ID_691	13	0	0.57	0.74	4.98
GRMZM2G022514	ID_703	13	0	-1.51	-0.67	3.28
GRMZM2G023591	ID_705	13	0	16.02	-5.34	70.51
GRMZM2G024668	ID_710	13	0	-3.14	-39.82	309.26
GRMZM2G025611	ID_714	13	0	-0.04	-0.5	0.63
GRMZM2G025812	ID_715	13	0	25.26	6.4	59.25
GRMZM2G026050	ID_717	13	0	3.52	3.03	12.49
GRMZM2G026371	ID_719	13	0	-4.19	-4.52	14.81
GRMZM2G030713	ID_732	13	0	0.47	-0.09	1.65
GRMZM2G031102	ID_733	13	0	-2.31	-3.47	15.41
GRMZM2G035222	ID_748	13	0	0.4	-0.15	8.38
GRMZM2G036826	ID_760	13	0	0.45	0.47	3.49
GRMZM2G037255	ID_764	13	0	-0.45	0.44	7.68
GRMZM2G038926	ID_766	13	0	-19.91	-19.83	25.41
GRMZM2G039365	ID_768	13	0	-1.01	5.79	46.94
GRMZM2G041442	ID_780	13	0	-2.89	-2	19.79
GRMZM2G044720	ID_790	13	0	1.02	1.98	21.74
GRMZM2G046382	ID_799	13	0	28.82	20.67	109.22
GRMZM2G047956	ID_804	13	0	-7.58	-7.66	14.96
GRMZM2G048430	ID_807	13	0	-1.54	-1.6	6.51
GRMZM2G051135	ID_823	13	0	20.37	31.86	107.33
GRMZM2G053315	ID_831	13	0	-6.78	-7.19	36.89
GRMZM2G055180	ID_842	13	0	-2.24	-4.32	9.39
GRMZM2G055313	ID_843	13	0	0.17	0.18	2
GRMZM2G061126	ID_870	13	0	-96.38	-92.99	250.52
GRMZM2G069651	ID_912	13	0	0.54	7.58	45.48
GRMZM2G070863	ID_916	13	0	1.03	4.01	27.81
GRMZM2G071343	ID_920	13	0	2.91	0.31	14.69
GRMZM2G071790	ID_922	13	0	1.33	0.34	5.75
GRMZM2G073223	ID_929	13	0	-0.51	-0.08	2.21
GRMZM2G074097	ID_933	13	0	46.49	-8.69	499.76
GRMZM2G074307	ID_934	13	0	-37.19	-36.03	87.18
GRMZM2G076778	ID_946	13	0	0.36	0.85	5.51
GRMZM2G077088	ID_949	13	0	-3.99	2.4	16.54
GRMZM2G078407	ID_957	13	0	-1.8	0.52	13.95
GRMZM2G078887	ID_962	13	0	-7.5	-5.3	20.84
GRMZM2G085336	ID_1003	13	0	-0.36	-1.07	1.04
GRMZM2G087728	ID_1011	13	0	1.59	-1.5	9.29
GRMZM2G088053	ID_1014	13	0	-1.7	-2.53	3.39
GRMZM2G091481	ID_1036	13	0	2.88	-4.62	103.25
GRMZM2G091743	ID_1039	13	0	-3.33	-5.7	16.11
GRMZM2G092813	ID_1043	13	0	2.47	3	12.05
GRMZM2G096585	ID_1053	13	0	0.35	3.46	57.91
GRMZM2G098167	ID_1059	13	0	4.39	4.48	28.18
GRMZM2G099867	ID_1064	13	0	-2.32	-3.37	16.05
GRMZM2G102711	ID_1077	13	0	-0.1	0.08	1.32
GRMZM2G103179	ID_1081	13	0	-3.1	-1.39	13.75
GRMZM2G104118	ID_1089	13	0	0.07	1.8	10.67
GRMZM2G104220	ID_1090	13	0	-0.75	-0.5	6.84
GRMZM2G105787	ID_1097	13	0	-0.47	-0.47	2.69
GRMZM2G106548	ID_1100	13	0	-0.84	-1.15	3.81
GRMZM2G111017	ID_1131	13	0	-0.44	-0.98	3.52
GRMZM2G112686	ID_1137	13	0	0.74	0.72	5.04
GRMZM2G113682	ID_1144	13	0	-3.55	-7.55	17.06
GRMZM2G114793	ID_1148	13	0	8.47	4.99	51.59
GRMZM2G119468	ID_1175	13	0	-0.35	-0.1	1.55
GRMZM2G121700	ID_1188	13	0	-0.75	1.81	12.73
GRMZM2G121843	ID_1190	13	0	-0.17	0	1.06
GRMZM2G124948	ID_1203	13	0	-0.35	0.34	1.87
GRMZM2G125669	ID_1211	13	0	-1.37	0.86	6.15
GRMZM2G126199	ID_1215	13	0	-0.36	-2.25	3.42
GRMZM2G128923	ID_1229	13	0	-17.11	-17.67	21.14
GRMZM2G131266	ID_1240	13	0	0.14	0.66	2.64
GRMZM2G133943	ID_1250	13	0	-0.31	0.08	2.18
GRMZM2G135722	ID_1257	13	0	0.02	-0.09	1.98
GRMZM2G137321	ID_1264	13	0	-4.93	-2.9	19.34
GRMZM2G138585	ID_1271	13	0	0.12	0.34	2.46
GRMZM2G138589	ID_1272	13	0	-0.57	2.05	28.44
GRMZM2G138710	ID_1273	13	0	0.62	0.19	5.17
GRMZM2G139786	ID_1277	13	0	1.84	2.94	18.82
GRMZM2G145632	ID_1298	13	0	-20.22	-18.55	60.84
GRMZM2G146298	ID_1301	13	0	-6.35	-6.46	24.17
GRMZM2G148675	ID_1310	13	0	-35.94	-31.51	129.6
GRMZM2G148768	ID_1311	13	0	-1.79	-1.51	12.48
GRMZM2G149392	ID_1313	13	0	0.38	0.2	4.45
GRMZM2G149935	ID_1319	13	0	-0.26	0.14	1.54
GRMZM2G152777	ID_1332	13	0	-1.54	1.16	7.49
GRMZM2G153799	ID_1337	13	0	5.63	-0.32	25.36
GRMZM2G154789	ID_1345	13	0	17.16	-19.84	74.19
GRMZM2G156517	ID_1351	13	0	-5.13	-6.98	8.86
GRMZM2G158394	ID_1358	13	0	4.77	112.87	676.16
GRMZM2G161315	ID_1367	13	0	5.72	3.55	17.39
GRMZM2G162382	ID_1372	13	0	0.73	0.89	6.35
GRMZM2G168077	ID_1398	13	0	-0.23	0	1.06
GRMZM2G176029	ID_1427	13	0	11.82	2.86	26.75
GRMZM2G306919	ID_1461	13	0	-0.34	0.2	2.17
GRMZM2G310431	ID_1464	13	0	11.26	18.9	81.04
GRMZM2G315375	ID_1471	13	0	-2.08	-1.8	5.09
GRMZM2G317262	ID_1475	13	0	-0.12	0.44	2.7
GRMZM2G328438	ID_1499	13	0	1.07	0.2	2.77
GRMZM2G338465	ID_1514	13	0	-0.22	0.25	3.9
GRMZM2G343828	ID_1525	13	0	0.45	0.37	3.4
GRMZM2G365374	ID_1562	13	0	-4.92	3.27	27.86
GRMZM2G372632	ID_1570	13	0	2.57	1.8	8.67
GRMZM2G375517	ID_1577	13	0	1.57	1.66	9.94
GRMZM2G380286	ID_1586	13	0	-0.69	-0.86	1.25
GRMZM2G404249	ID_1605	13	0	6.17	5.58	24.1
GRMZM2G413422	ID_1612	13	0	-7.7	-5.9	40.85
GRMZM2G413460	ID_1613	13	0	-0.11	-0.11	0.97
GRMZM2G419166	ID_1622	13	0	0.66	0.27	7.98
GRMZM2G419994	ID_1623	13	0	-0.32	-0.46	0.57
GRMZM2G424857	ID_1626	13	0	-3.72	-4.13	14.68
GRMZM2G429000	ID_1632	13	0	0.68	0.28	5.48
GRMZM2G429035	ID_1633	13	0	-0.13	0.22	1.88
GRMZM2G429184	ID_1634	13	0	-2.06	-2.96	7.84
GRMZM2G430849	ID_1637	13	0	-1.31	-3.65	6.75
GRMZM2G434541	ID_1641	13	0	8.2	13.26	58.54
GRMZM2G438176	ID_1646	13	0	-0.79	-0.78	4.82
GRMZM2G443180	ID_1655	13	0	1.73	0.68	4.69
GRMZM2G443785	ID_1658	13	0	0.99	0.57	3.16
GRMZM2G447005	ID_1665	13	0	-2.44	-0.8	13.32
GRMZM2G448001	ID_1667	13	0	-2.8	-0.7	110.58
GRMZM2G456357	ID_1685	13	0	-4.5	-1.98	9.96
GRMZM2G474019	ID_1699	13	0	-5.5	-5.43	23.89
GRMZM2G479045	ID_1711	13	0	0.23	0.46	1.69
GRMZM2G520811	ID_1724	13	0	0.8	0.78	4.88
GRMZM2G700968	ID_1740	13	0	1.05	3.11	14.27
GRMZM5G802801	ID_1744	13	0	11.26	8.2	63.9
GRMZM5G806774	ID_1750	13	0	0	0	84.83
GRMZM5G825515	ID_1761	13	0	-4.19	-0.62	27.66
GRMZM5G833699	ID_1767	13	0	15.54	23.71	74.49
GRMZM5G834532	ID_1768	13	0	-4.82	-4.68	7.91
GRMZM5G841343	ID_1773	13	0	14.84	3.77	91.46
GRMZM5G852703	ID_1780	13	0	-2.25	-1.44	8.98
GRMZM5G862276	ID_1785	13	0	-2.56	-2.91	21.87
GRMZM5G877647	ID_1791	13	0	-0.67	-3.5	4.24
GRMZM5G877649	ID_1792	13	0	-0.34	0.28	5.28
GRMZM5G890040	ID_1799	13	0	-4.56	-4.37	5.42
GRMZM5G899188	ID_1810	13	0	14.36	8.19	48.45
GRMZM5G899825	ID_1811	13	0	-7.87	-7.98	12.43
GRMZM5G856297	ID_9	25	0	2.05	8.35	12.4
GRMZM2G470075	ID_45	25	0	0.36	0.64	1.33
GRMZM2G425072	ID_71	25	0	1.92	3.03	6.24
GRMZM2G311898	ID_150	25	0	2.75	9.77	11.38
GRMZM2G176085	ID_164	25	0	7.52	17.42	26.23
GRMZM2G147014	ID_241	25	0	3.32	6.15	8.76
GRMZM2G079956	ID_360	25	0	0.9	2.54	4.28
GRMZM2G004909	ID_610	25	0	7.4	33.62	47.87
GRMZM2G034157	ID_745	25	0	10.44	18.63	40.32
GRMZM2G036203	ID_757	25	0	6.07	21.62	28.75
GRMZM2G049882	ID_812	25	0	9.35	15.63	28.34
GRMZM2G059134	ID_864	25	0	3.44	11.45	17.59
GRMZM2G062458	ID_876	25	0	1.48	4.79	6.7
GRMZM2G068763	ID_904	25	0	8.66	11.61	16.29
GRMZM2G076943	ID_948	25	0	1.97	3.25	5.16
GRMZM2G083810	ID_991	25	0	6.25	11.76	26.35
GRMZM2G125314	ID_1207	25	0	15.33	27.86	35.94
GRMZM2G148561	ID_1308	25	0	1.04	2.57	3.3
GRMZM2G168261	ID_1400	25	0	2.1	3.54	4.48
GRMZM2G323387	ID_1483	25	0	0.52	1.52	2.19
GRMZM2G404126	ID_1604	25	0	1.8	3.97	8.12
GRMZM2G417070	ID_1620	25	0	0.54	2.01	2.46
GRMZM2G431714	ID_1639	25	0	4.35	6.29	11.52
GRMZM2G471517	ID_44	24	0	5.41	10.19	10.84
GRMZM2G157458	ID_215	24	0	3.91	7.1	8.45
GRMZM2G081536	ID_357	24	0	13.48	25.32	24.35
GRMZM2G065203	ID_394	24	0	2.6	7.86	7.8
GRMZM2G062531	ID_398	24	0	14.48	29.03	33.5
GRMZM2G043109	ID_430	24	0	16.69	31.09	34.28
AC200622.3_FG005	ID_543	24	0	1.02	1.51	1.36
GRMZM2G014672	ID_654	24	0	2.63	4.64	4.04
GRMZM2G024718	ID_712	24	0	0.83	2.21	2.13
GRMZM2G031607	ID_739	24	0	2.39	7.56	6.26
GRMZM2G059637	ID_866	24	0	1.35	2.9	2.33
GRMZM2G150260	ID_1322	24	0	23.52	37.21	38.13
GRMZM2G180422	ID_1447	24	0	0.68	1.93	1.73
GRMZM2G315431	ID_1472	24	0	0.62	2.18	2.25
GRMZM2G357399	ID_123	23	0	1.7	2.99	1.14
GRMZM2G065928	ID_392	23	0	23.63	147.19	67.02
AC197705.4_FG011	ID_538	23	0	6.96	10.45	2.87
AC212728.3_FG001	ID_572	23	0	2.91	5.85	2.35
GRMZM2G008247	ID_627	23	0	21.97	40.08	17.97
GRMZM2G017416	ID_676	23	0	5.06	6.07	3.68
GRMZM2G030216	ID_730	23	0	2.8	3.87	2.36
GRMZM2G036351	ID_759	23	0	10.26	15.43	7.04
GRMZM2G052796	ID_830	23	0	14.86	28.13	8.4
GRMZM2G073969	ID_931	23	0	18.68	47.31	28.54
GRMZM2G084812	ID_997	23	0	11.41	13.51	7.9
GRMZM2G107096	ID_1104	23	0	2.49	4.4	2.02
GRMZM2G109326	ID_1116	23	0	2.83	3.79	1.49
GRMZM2G115357	ID_1151	23	0	0.71	5.09	2.29
GRMZM2G164413	ID_1377	23	0	0.32	1.52	0.63
GRMZM2G165387	ID_1387	23	0	3.98	8.8	2.15
GRMZM2G165919	ID_1391	23	0	12.56	23.04	8.25
GRMZM2G177356	ID_1432	23	0	1.53	6.95	3.54
GRMZM2G337706	ID_1513	23	0	9.79	25.22	5.14
GRMZM2G365160	ID_1561	23	0	11.93	13.3	6.88
GRMZM2G380319	ID_1587	23	0	4.74	14.4	5.08
GRMZM2G404603	ID_1606	23	0	1.52	12.32	6.21
GRMZM2G414047	ID_1617	23	0	1.32	2.22	0.46
GRMZM2G454056	ID_1678	23	0	3.59	8.98	4.45
GRMZM2G455440	ID_1681	23	0	8.61	18.19	4.45
GRMZM2G476049	ID_1708	23	0	7.04	11.1	8
GRMZM5G864903	ID_5	22	0	3.8	3.83	8.34
GRMZM5G835677	ID_21	22	0	2.22	2.94	5.13
GRMZM2G399136	ID_89	22	0	34.03	11.07	56.98
GRMZM2G396248	ID_91	22	0	1.41	1.53	2.18
GRMZM2G358987	ID_120	22	0	1.8	2.28	4.35
GRMZM2G169329	ID_183	22	0	11.73	14.68	45.75
GRMZM2G157153	ID_218	22	0	6.25	4.8	8.96
GRMZM2G123309	ID_288	22	0	0.79	0.69	1.69
GRMZM2G104549	ID_327	22	0	889.59	787.82	1304.91
GRMZM2G073275	ID_371	22	0	13.29	3.65	25.41
GRMZM2G071630	ID_379	22	0	5.64	7.91	23.24
GRMZM2G070034	ID_385	22	0	6.58	7.98	15.67
GRMZM2G056407	ID_408	22	0	1.54	2.12	5.06
GRMZM2G049915	ID_418	22	0	110.71	99.92	298.12
GRMZM2G042789	ID_431	22	0	79.04	22.45	170.11
GRMZM2G013652	ID_482	22	0	8.48	3.94	12.25
GRMZM2G009282	ID_488	22	0	0.75	0.69	1.59
AC208915.3_FG010	ID_513	22	0	51.65	50.18	84.88
AC199315.4_FG001	ID_540	22	0	69.35	26.01	154.58
AC212023.4_FG004	ID_570	22	0	92.21	71.09	122.82
GRMZM2G004060	ID_603	22	0	13.54	5.72	21.05
GRMZM2G021794	ID_699	22	0	1.16	0.99	1.53
GRMZM2G050080	ID_814	22	0	1.15	1.4	3.74
GRMZM2G059029	ID_862	22	0	0.77	0.98	2.76
GRMZM2G071021	ID_918	22	0	2.82	1.88	4.02
GRMZM2G072383	ID_925	22	0	168.41	173.62	401.99
GRMZM2G089574	ID_1019	22	0	28.31	17.84	50.05
GRMZM2G090594	ID_1029	22	0	1.49	1.77	3
GRMZM2G097135	ID_1055	22	0	6.87	4.29	18.65
GRMZM2G116704	ID_1158	22	0	7.04	4.63	10.38
GRMZM2G117240	ID_1160	22	0	7.28	5.22	20.31
GRMZM2G120724	ID_1182	22	0	1.23	1.39	4.25
GRMZM2G129357	ID_1230	22	0	0.52	0.32	1.32
GRMZM2G133407	ID_1249	22	0	6.85	5.42	16.31
GRMZM2G137788	ID_1267	22	0	2.03	1.81	3.93
GRMZM2G152089	ID_1329	22	0	4.41	3	10.32
GRMZM2G153527	ID_1335	22	0	1.66	2.3	6.24
GRMZM2G158117	ID_1355	22	0	12.9	16.61	28.75
GRMZM2G181153	ID_1451	22	0	2.54	1.27	4.35
GRMZM2G342246	ID_1521	22	0	3.56	1.97	8.23
GRMZM2G346982	ID_1534	22	0	0.77	0.39	1.05
GRMZM2G362413	ID_1557	22	0	4.4	2	6.07
GRMZM2G469142	ID_1694	22	0	7.54	9.16	23.24
GRMZM2G471089	ID_1695	22	0	6.36	7.68	14.08
GRMZM2G567452	ID_1734	22	0	91.64	95.07	225.23
GRMZM5G862817	ID_6	21	0	1.64	1.28	1.02
GRMZM2G469224	ID_46	21	0	2.6	3.01	1.87
GRMZM2G449950	ID_56	21	0	23.08	20.28	25.52
GRMZM2G429955	ID_64	21	0	471.45	319.14	491.41
GRMZM2G172834	ID_174	21	0	58.08	37.65	57.72
GRMZM2G169372	ID_182	21	0	121.64	167.08	123.63
GRMZM2G164074	ID_197	21	0	4.58	3.61	2.21
GRMZM2G155281	ID_220	21	0	15.4	12.26	8.45
GRMZM2G137329	ID_263	21	0	155.45	95.86	129.56
GRMZM2G084958	ID_354	21	0	45.2	28.81	40.2
GRMZM2G034471	ID_449	21	0	83.97	57.72	52.3
AC197555.3_FG008	ID_535	21	0	13.36	10	11.05
AC210169.3_FG002	ID_566	21	0	1.79	1.86	1.34
GRMZM2G039723	ID_770	21	0	8.79	5.52	7.39
GRMZM2G064437	ID_889	21	0	12.87	10.35	9.89
GRMZM2G078656	ID_960	21	0	6.57	5.09	5.17
GRMZM2G078723	ID_961	21	0	9.37	9.95	9.71
GRMZM2G099454	ID_1063	21	0	24.05	17.68	20.71
GRMZM2G105330	ID_1094	21	0	2.72	3.25	2.17
GRMZM2G108959	ID_1114	21	0	5.43	3.28	4.61
GRMZM2G159908	ID_1362	21	0	5.07	4.52	4.1
GRMZM2G178886	ID_1438	21	0	5.43	5.74	4.6
GRMZM2G328258	ID_1498	21	0	2.08	1.33	1.97
GRMZM2G408458	ID_1609	21	0	14.6	10.74	15.97
GRMZM2G449709	ID_1672	21	0	29.04	16.23	23.62
GRMZM2G450273	ID_1674	21	0	7.94	6.02	4.84
GRMZM2G546097	ID_1728	21	0	673.88	343.29	453.07
GRMZM5G888620	ID_1797	21	0	6.95	5.16	7.44
GRMZM2G466044	ID_48	20	0	1.44	2.29	-0.53
GRMZM2G456471	ID_51	20	0	0.49	0.59	-0.55
GRMZM2G427557	ID_66	20	0	5.33	6.44	2.44
GRMZM2G394500	ID_95	20	0	12.7	6.74	0.15
GRMZM2G177384	ID_161	20	0	3.91	3.06	1.83
GRMZM2G167336	ID_188	20	0	1.45	3.12	-0.81
GRMZM2G159119	ID_210	20	0	13.59	6.39	-0.34
GRMZM2G129860	ID_276	20	0	118.84	86.09	22.42
GRMZM2G125850	ID_283	20	0	265.62	134.59	3.33
GRMZM2G112377	ID_312	20	0	4.01	2.45	0.27
GRMZM2G099003	ID_334	20	0	16.5	29.83	-11.44
GRMZM2G079807	ID_361	20	0	18.68	10.16	0.91
GRMZM2G071688	ID_378	20	0	2.93	2.83	-0.17
GRMZM2G067315	ID_389	20	0	18.34	10.02	-5.03
GRMZM2G052720	ID_417	20	0	10.43	6.89	-2.2
GRMZM2G033846	ID_451	20	0	25.26	44.02	3.68
GRMZM2G013430	ID_483	20	0	5.44	8.09	-1.93
GRMZM2G013299	ID_485	20	0	13.26	11.67	-2.89
GRMZM2G008263	ID_492	20	0	150.02	78.27	-34.16
AC217947.4_FG002	ID_507	20	0	4.8	2.41	0.63
AC149828.2_FG004	ID_520	20	0	3.89	2.94	0.1
AC204212.4_FG001	ID_547	20	0	103.23	84.41	-11.47
AC225718.2_FG009	ID_577	20	0	6.74	3.72	0.19
GRMZM2G009223	ID_631	20	0	53.14	115.52	-14.16
GRMZM2G014055	ID_652	20	0	555.44	285.88	-35.53
GRMZM2G016370	ID_665	20	0	32.67	17.67	-0.35
GRMZM2G023769	ID_707	20	0	3.75	3.92	1.69
GRMZM2G024680	ID_711	20	0	1.42	1.83	0.19
GRMZM2G040508	ID_775	20	0	11.66	7.23	-0.15
GRMZM2G042164	ID_782	20	0	5.04	5.11	-0.11
GRMZM2G042323	ID_785	20	0	50.72	27.92	-1.9
GRMZM2G050561	ID_820	20	0	3.43	3.11	0.07
GRMZM2G051709	ID_825	20	0	14.92	9.38	0.91
GRMZM2G057140	ID_854	20	0	4.44	2.41	0.05
GRMZM2G059129	ID_863	20	0	2.75	5.33	-1.38
GRMZM2G078024	ID_953	20	0	8.55	5.8	0.06
GRMZM2G088539	ID_1016	20	0	5.88	2.86	0.1
GRMZM2G100176	ID_1065	20	0	3.93	2.58	0.35
GRMZM2G103546	ID_1084	20	0	7.19	4.21	2.46
GRMZM2G107839	ID_1107	20	0	93.07	60.33	18.87
GRMZM2G109830	ID_1122	20	0	3.58	3.13	0.41
GRMZM2G110714	ID_1129	20	0	3.68	2.26	-0.41
GRMZM2G115480	ID_1153	20	0	7.07	11.31	-0.11
GRMZM2G119705	ID_1179	20	0	27.66	23.96	12.31
GRMZM2G122687	ID_1198	20	0	22.73	11.42	1.45
GRMZM2G125923	ID_1214	20	0	2.99	2.03	0.08
GRMZM2G129954	ID_1232	20	0	19.35	25.26	1.82
GRMZM2G138067	ID_1270	20	0	28.41	19.15	5.29
GRMZM2G141320	ID_1282	20	0	135.52	63.6	1.89
GRMZM2G142748	ID_1287	20	0	1.24	1.04	-0.45
GRMZM2G156712	ID_1353	20	0	1.06	1.04	-0.27
GRMZM2G177050	ID_1430	20	0	11.01	9.95	-2.5
GRMZM2G179005	ID_1441	20	0	13.07	12.74	-1.92
GRMZM2G180172	ID_1445	20	0	1.78	2.17	0.36
GRMZM2G316778	ID_1473	20	0	1.01	0.66	0.36
GRMZM2G371167	ID_1568	20	0	91.11	71.96	12.99
GRMZM2G424112	ID_1625	20	0	6.33	3.36	-0.21
GRMZM2G457929	ID_1687	20	0	7.19	15.85	-1.42
GRMZM2G493395	ID_1719	20	0	14.58	10.67	4.98
GRMZM2G502467	ID_1722	20	0	2.49	2.36	-0.18
GRMZM2G702229	ID_1743	20	0	7.34	4.72	-0.85
GRMZM5G839640	ID_1770	20	0	70.43	47.91	-32.2
GRMZM5G854625	ID_1782	20	0	6.43	5.14	0.12
GRMZM2G430807	ID_63	19	0	35.14	-5.01	49.44
GRMZM2G164974	ID_194	19	0	7.06	2.73	9.07
GRMZM2G149662	ID_236	19	0	0.71	-1.05	1.19
GRMZM2G144367	ID_248	19	0	8.78	-6.24	7.9
GRMZM2G130173	ID_275	19	0	66.38	-80.01	107.93
GRMZM2G122437	ID_291	19	0	2.34	0.57	4.12
GRMZM2G099642	ID_332	19	0	1.33	0.59	1.39
GRMZM2G053707	ID_415	19	0	1.45	-1.41	1.77
GRMZM2G035557	ID_446	19	0	198.58	81.25	204.13
GRMZM2G035063	ID_448	19	0	4.3	0.48	8.84
GRMZM2G028393	ID_460	19	0	907.65	-391.05	1473.91
GRMZM2G014193	ID_479	19	0	4.78	1.08	5.47
GRMZM2G000353	ID_501	19	0	6.13	-3.79	7.25
GRMZM2G010871	ID_637	19	0	17.11	4.57	20.78
GRMZM2G023711	ID_706	19	0	49.37	-10.26	23.77
GRMZM2G028570	ID_728	19	0	1.29	-0.27	2.54
GRMZM2G036996	ID_762	19	0	13.46	2.51	11.45
GRMZM2G045287	ID_795	19	0	1.87	0.15	1.68
GRMZM2G045779	ID_797	19	0	1.19	0.34	1.53
GRMZM2G047626	ID_803	19	0	14.08	2.39	8.15
GRMZM2G051256	ID_824	19	0	2.98	1.2	3.42
GRMZM2G062541	ID_878	19	0	0.97	0.08	1.91
GRMZM2G064136	ID_886	19	0	106.55	2.91	152.16
GRMZM2G066222	ID_894	19	0	17.31	-14.82	12.33
GRMZM2G067063	ID_901	19	0	0.66	-0.78	1.4
GRMZM2G068917	ID_905	19	0	4.41	-6.38	8.63
GRMZM2G071217	ID_919	19	0	1.37	-0.54	1.97
GRMZM2G072518	ID_926	19	0	11.82	3.27	11.36
GRMZM2G074395	ID_935	19	0	1.61	0.08	1.85
GRMZM2G078314	ID_956	19	0	15.81	4.17	17.15
GRMZM2G079127	ID_963	19	0	1.23	-0.02	2.04
GRMZM2G083128	ID_983	19	0	14.07	-11.16	9.26
GRMZM2G085054	ID_999	19	0	27.44	3.34	16.11
GRMZM2G091578	ID_1037	19	0	4.75	-0.92	5.27
GRMZM2G108396	ID_1108	19	0	9.14	3.87	5.38
GRMZM2G126582	ID_1216	19	0	2.05	-0.45	4.56
GRMZM2G141299	ID_1281	19	0	4.15	-2.04	6.32
GRMZM2G143780	ID_1289	19	0	18.83	-1.99	14.12
GRMZM2G144197	ID_1292	19	0	1.01	-0.4	1.88
GRMZM2G145583	ID_1297	19	0	3.75	0.19	4.53
GRMZM2G147544	ID_1305	19	0	16.02	3.9	11.83
GRMZM2G147862	ID_1307	19	0	4.82	-0.95	3.54
GRMZM2G154896	ID_1346	19	0	3.69	-1.3	4.8
GRMZM2G154936	ID_1347	19	0	0.97	-0.17	0.66
GRMZM2G176780	ID_1429	19	0	1.65	0.16	1.2
GRMZM2G301485	ID_1452	19	0	0.98	-1.25	1.49
GRMZM2G325650	ID_1490	19	0	23.8	-0.91	28.57
GRMZM2G338702	ID_1515	19	0	4.9	1.36	2.89
GRMZM2G352618	ID_1542	19	0	6.91	-0.8	6.16
GRMZM2G446218	ID_1664	19	0	3.29	-0.02	1.68
GRMZM2G479529	ID_1714	19	0	1.44	-0.27	0.6
GRMZM5G898668	ID_1809	19	0	5.89	1.52	5.03
GRMZM5G803365	ID_30	16	0	0	1.15	2.61
GRMZM2G422240	ID_75	16	0	-7.62	245.95	413.07
GRMZM2G415793	ID_80	16	0	-1.06	1.33	4.52
GRMZM2G407044	ID_82	16	0	-0.08	1.35	1.94
GRMZM2G370081	ID_113	16	0	-0.22	0.51	1.39
GRMZM2G165530	ID_192	16	0	-0.22	0.84	3.15
GRMZM2G139512	ID_255	16	0	-1.55	1.01	5.62
GRMZM2G119252	ID_296	16	0	-2.23	3.95	10.63
GRMZM2G049349	ID_420	16	0	-1.01	4.89	15.85
GRMZM2G045473	ID_426	16	0	3.11	6.96	16.73
GRMZM2G043147	ID_429	16	0	0.1	4.37	9.51
GRMZM2G041961	ID_434	16	0	-0.26	1.74	4.18
GRMZM2G031033	ID_455	16	0	2.39	6.22	15.14
GRMZM2G005146	ID_496	16	0	19.89	64.63	210.81
AC233899.1_FG005	ID_504	16	0	-0.76	1.58	6.87
AC195174.2_FG007	ID_527	16	0	0	1.94	4.62
AC197705.4_FG003	ID_537	16	0	0.55	1.77	4.56
AC205122.4_FG003	ID_552	16	0	-1.4	2.21	3.61
GRMZM2G012183	ID_646	16	0	1.85	4.74	14.4
GRMZM2G026804	ID_720	16	0	0.22	0.97	1.89
GRMZM2G047616	ID_802	16	0	-1.63	2.14	3.67
GRMZM2G052562	ID_827	16	0	0.31	1.34	2.15
GRMZM2G055570	ID_845	16	0	0.1	2.09	3.87
GRMZM2G058491	ID_860	16	0	0.02	0.56	1.91
GRMZM2G060886	ID_869	16	0	1.93	25.01	50.11
GRMZM2G063676	ID_883	16	0	-2.6	3.16	11.82
GRMZM2G066428	ID_896	16	0	-0.48	2.35	4.14
GRMZM2G080724	ID_971	16	0	4.2	17.42	58.57
GRMZM2G100372	ID_1067	16	0	0.69	1.63	4.35
GRMZM2G107031	ID_1103	16	0	-0.72	0.84	2.54
GRMZM2G108714	ID_1111	16	0	-0.22	0.36	0.92
GRMZM2G110657	ID_1127	16	0	-1.11	2.34	3.48
GRMZM2G118433	ID_1172	16	0	-0.67	1.21	3.76
GRMZM2G118637	ID_1173	16	0	-13.29	29.51	62.63
GRMZM2G119783	ID_1180	16	0	0.53	3.06	7.25
GRMZM2G122251	ID_1194	16	0	0.28	1.48	2.18
GRMZM2G122277	ID_1195	16	0	0.83	3.46	11.27
GRMZM2G128617	ID_1226	16	0	3.14	9.81	18.06
GRMZM2G130953	ID_1236	16	0	-1.13	3.6	13.24
GRMZM2G136580	ID_1260	16	0	0.14	1.9	6.09
GRMZM2G139815	ID_1278	16	0	0.55	2.39	4.38
GRMZM2G143998	ID_1290	16	0	0.77	3.04	9.52
GRMZM2G149636	ID_1317	16	0	-0.14	0.54	2.28
GRMZM2G154685	ID_1344	16	0	0.09	2.33	4.38
GRMZM2G306679	ID_1460	16	0	27.7	49.88	148.75
GRMZM2G307892	ID_1462	16	0	-0.07	0.9	2.18
GRMZM2G314125	ID_1467	16	0	-9.75	28.84	46.96
GRMZM2G324886	ID_1487	16	0	0.02	2.95	8.32
GRMZM2G335242	ID_1511	16	0	1.48	2.69	7.36
GRMZM2G341058	ID_1520	16	0	-1.28	1.36	3.79
GRMZM2G346839	ID_1532	16	0	0.84	5.12	8.93
GRMZM2G360681	ID_1555	16	0	4.56	12.96	34.51
GRMZM2G363116	ID_1558	16	0	-0.07	4.24	10.72
GRMZM2G449681	ID_1671	16	0	-2.09	9.27	27.1
GRMZM2G479260	ID_1713	16	0	6.21	18.87	34.8
GRMZM2G531230	ID_1725	16	0	-31.93	36.71	83.65
GRMZM5G858249	ID_1784	16	0	-0.38	0.46	1.69
GRMZM5G852325	ID_11	15	0	-0.83	18.14	20.11
GRMZM5G848550	ID_13	15	0	-3.05	34.17	31.32
GRMZM5G828630	ID_24	15	0	28.16	205.25	161.59
GRMZM2G478553	ID_38	15	0	0.13	2.97	2.03
GRMZM2G474755	ID_42	15	0	-1.7	11.15	9.83
GRMZM2G356938	ID_124	15	0	-0.14	1.53	1.6
GRMZM2G333635	ID_135	15	0	1.08	15.39	8.39
GRMZM2G303964	ID_154	15	0	0.22	9.82	8.43
GRMZM2G103197	ID_328	15	0	0.67	8.24	9.35
GRMZM2G088819	ID_346	15	0	0.41	8.55	4.28
GRMZM2G071277	ID_381	15	0	-0.58	6.07	5.35
GRMZM2G037015	ID_444	15	0	-0.53	14.1	13.96
GRMZM2G036455	ID_445	15	0	3.35	21.66	12.87
GRMZM2G028535	ID_458	15	0	1.56	8.93	6.74
AC225718.2_FG006	ID_506	15	0	-6.11	8.53	3.56
AC197013.3_FG003	ID_516	15	0	-5.66	5.68	7.44
AC187157.4_FG005	ID_523	15	0	0.33	1.41	1.6
AC197387.3_FG004	ID_534	15	0	0	1.08	1.24
GRMZM2G011240	ID_641	15	0	-0.4	0.82	0.72
GRMZM2G016649	ID_668	15	0	0.08	3.18	2.16
GRMZM2G020150	ID_695	15	0	1.65	8.7	9.21
GRMZM2G025895	ID_716	15	0	-0.03	10.8	6.68
GRMZM2G030252	ID_731	15	0	-1.71	3.5	3.05
GRMZM2G035853	ID_755	15	0	-6.67	10.49	9.05
GRMZM2G049378	ID_809	15	0	15.86	118.65	69.51
GRMZM2G049767	ID_811	15	0	0.48	7.44	5.13
GRMZM2G053692	ID_835	15	0	0	1.17	0.89
GRMZM2G054807	ID_840	15	0	0.63	3.91	2.26
GRMZM2G061408	ID_871	15	0	-0.03	10.81	6.69
GRMZM2G061487	ID_872	15	0	-4.07	29.46	30.76
GRMZM2G062555	ID_879	15	0	-1.7	5.92	5.74
GRMZM2G068967	ID_906	15	0	-0.03	10.42	7.6
GRMZM2G073548	ID_930	15	0	0.13	2.53	2.52
GRMZM2G079490	ID_965	15	0	0.19	2.35	2.97
GRMZM2G082032	ID_973	15	0	-13.52	45.41	47.8
GRMZM2G082184	ID_976	15	0	-0.1	4.15	2.03
GRMZM2G083812	ID_992	15	0	-0.79	1.51	1.85
GRMZM2G106792	ID_1101	15	0	3.77	54.34	39.5
GRMZM2G117497	ID_1163	15	0	1.87	15.03	15.47
GRMZM2G120539	ID_1181	15	0	0.1	9.13	4.46
GRMZM2G121753	ID_1189	15	0	16.3	92.42	75.51
GRMZM2G142709	ID_1286	15	0	0.46	2.55	2.42
GRMZM2G149647	ID_1318	15	0	6.18	62.93	83.74
GRMZM2G158232	ID_1356	15	0	4.63	257.98	304.63
GRMZM2G174860	ID_1421	15	0	0.19	2.93	2.54
GRMZM2G177726	ID_1433	15	0	-3.95	7.82	3.58
GRMZM2G310368	ID_1463	15	0	0.35	12.64	7.22
GRMZM2G330049	ID_1503	15	0	-1.58	19.06	13.47
GRMZM2G355572	ID_1543	15	0	0.09	39.77	24.75
GRMZM2G357631	ID_1548	15	0	-0.28	15.93	8.49
GRMZM2G366532	ID_1563	15	0	0.4	56.84	58
GRMZM2G388823	ID_1595	15	0	-0.72	1.6	0.9
GRMZM2G410710	ID_1610	15	0	0.74	4	2.71
GRMZM2G425004	ID_1627	15	0	-0.27	19.19	10.3
GRMZM2G437100	ID_1645	15	0	6.46	45.27	51.43
GRMZM2G438202	ID_1647	15	0	-0.17	14.78	7.53
GRMZM2G445634	ID_1662	15	0	-0.49	16.18	10.35
GRMZM2G499197	ID_1721	15	0	0.07	1.94	1.89
GRMZM5G818101	ID_1757	15	0	0.81	5.15	5.99
GRMZM5G852704	ID_1781	15	0	-1.07	2.76	1.73
GRMZM2G400714	ID_87	14	0	1.46	30.07	3.3
GRMZM2G400281	ID_88	14	0	-0.03	2.16	-1.72
GRMZM2G389301	ID_100	14	0	0	2.1	0.6
GRMZM2G320373	ID_140	14	0	0.02	5.31	1.23
GRMZM2G174347	ID_172	14	0	0.72	6.42	0.54
GRMZM2G134334	ID_268	14	0	-0.97	22.87	-4.47
GRMZM2G129775	ID_277	14	0	0.06	1.71	-0.13
GRMZM2G127546	ID_281	14	0	0.13	0.88	-0.31
GRMZM2G077415	ID_366	14	0	-1.3	8.93	-0.95
GRMZM2G035103	ID_447	14	0	1.25	9.61	1.36
GRMZM2G025833	ID_463	14	0	0.83	3.83	0.65
GRMZM2G003682	ID_497	14	0	-0.74	1.12	-0.3
AC208201.3_FG002	ID_514	14	0	-0.91	5.11	1.77
AC200298.4_FG001	ID_515	14	0	-0.45	1.64	-2.02
AC206951.3_FG017	ID_556	14	0	-8.39	14	-9.98
AC234185.1_FG004	ID_586	14	0	-0.46	4.87	-0.75
AC234520.1_FG003	ID_587	14	0	5.84	13.8	-1.31
GRMZM2G001514	ID_594	14	0	0.3	1.39	0.4
GRMZM2G010768	ID_635	14	0	-0.84	1.38	-0.29
GRMZM2G020054	ID_693	14	0	0.08	11.87	3.99
GRMZM2G037189	ID_763	14	0	-7.45	15.52	-12.31
GRMZM2G044902	ID_792	14	0	-2.42	3.58	-1.61
GRMZM2G045431	ID_796	14	0	-0.03	5.12	0.59
GRMZM2G066716	ID_899	14	0	0	1.33	0
GRMZM2G069126	ID_907	14	0	0.11	5.25	2
GRMZM2G069146	ID_909	14	0	0.62	4.42	1.62
GRMZM2G075140	ID_939	14	0	-2.33	4.26	-0.64
GRMZM2G076593	ID_944	14	0	2.1	6.29	-1.19
GRMZM2G091331	ID_1033	14	0	2.8	7.44	-0.41
GRMZM2G097468	ID_1058	14	0	-1.24	3.43	0.65
GRMZM2G119623	ID_1177	14	0	-3.65	3.23	-1.19
GRMZM2G164591	ID_1380	14	0	-0.4	6.82	2.88
GRMZM2G165192	ID_1384	14	0	2.14	20.83	-1.44
GRMZM2G169458	ID_1405	14	0	-1.47	2.08	-2.04
GRMZM2G329454	ID_1502	14	0	-1.72	29.73	3.09
GRMZM2G336839	ID_1512	14	0	-0.28	0.73	-0.74
GRMZM2G351330	ID_1541	14	0	-2.99	8.69	-4.92
GRMZM2G374074	ID_1572	14	0	-0.46	20.98	8.75
GRMZM2G405090	ID_1607	14	0	1.72	7.12	1.74
GRMZM2G430394	ID_1636	14	0	-0.26	6.51	2.05
GRMZM2G441031	ID_1652	14	0	-0.22	3.07	0.03
GRMZM5G827496	ID_1762	14	0	1.25	3.89	-0.63
GRMZM5G828312	ID_1763	14	0	-3.81	9.23	1.62
GRMZM5G846097	ID_1777	14	0	0	14.88	0
GRMZM5G840703	ID_18	12	0	-65.38	-63.63	-316.68
GRMZM2G421946	ID_77	12	0	4.3	6.45	-12.42
GRMZM2G353024	ID_126	12	0	0.31	-2.3	-17.96
GRMZM2G168898	ID_185	12	0	-1.02	1.71	-13.6
GRMZM2G159200	ID_209	12	0	2.6	1.15	-5.77
GRMZM2G069928	ID_386	12	0	0.65	0.46	-6.81
AC233888.1_FG002	ID_505	12	0	-0.62	0.52	-5.92
AC210013.4_FG018	ID_563	12	0	-10.61	-12.31	-90.88
GRMZM2G005419	ID_611	12	0	0.97	0.69	-1.64
GRMZM2G035268	ID_749	12	0	0.41	11	-12.32
GRMZM2G045154	ID_794	12	0	0.42	-0.61	-4.57
GRMZM2G067915	ID_903	12	0	0.79	0.84	-2.33
GRMZM2G083472	ID_987	12	0	-2.55	-12.74	-76.43
GRMZM2G105801	ID_1098	12	0	0.99	2.2	-2.31
GRMZM2G128518	ID_1225	12	0	5.42	3.32	-26
GRMZM2G144273	ID_1293	12	0	-0.82	-0.75	-5.56
GRMZM2G151319	ID_1325	12	0	-2.19	-2.73	-9.29
GRMZM2G170625	ID_1408	12	0	0.05	-0.7	-3.52
GRMZM2G170692	ID_1409	12	0	-0.62	-0.57	-2.39
GRMZM2G178645	ID_1436	12	0	-0.34	-1.07	-4.01
GRMZM2G360191	ID_1553	12	0	-1.46	-1.58	-6.02
GRMZM2G383735	ID_1590	12	0	-0.06	3.29	-4.85
GRMZM2G388855	ID_1596	12	0	-11.07	-8.98	-39.28
GRMZM2G432631	ID_1640	12	0	0.46	0.38	-0.99
GRMZM2G446213	ID_1663	12	0	-0.3	0.28	-1.11
GRMZM5G803981	ID_1747	12	0	-3.52	-4.82	-16.04
GRMZM5G852396	ID_10	11	0	1.27	-3.34	1.5
GRMZM2G436710	ID_62	11	0	5.89	-17.15	-1.84
GRMZM2G427087	ID_67	11	0	0.74	-2.56	-0.7
GRMZM2G175543	ID_167	11	0	0.14	-2.55	-0.03
GRMZM2G171468	ID_176	11	0	0.74	-2.78	-0.82
GRMZM2G157505	ID_214	11	0	0.57	-1.15	0.95
GRMZM2G150893	ID_230	11	0	0.42	-14.66	1.13
GRMZM2G096792	ID_336	11	0	-2.24	-13.66	-0.67
GRMZM2G092752	ID_340	11	0	-0.07	-0.69	0.38
GRMZM2G089448	ID_345	11	0	0.93	-2.65	0.11
AC155610.2_FG009	ID_521	11	0	156.26	-140.18	19.08
AC210158.3_FG003	ID_564	11	0	0.25	-1.86	1.74
AC217300.3_FG005	ID_575	11	0	5.51	-31.23	-0.93
AC233850.1_FG003	ID_579	11	0	1.5	-3	2.59
AC234161.1_FG010	ID_585	11	0	-3.2	-8.39	1.24
GRMZM2G003769	ID_601	11	0	-2.17	-11.59	-2.3
GRMZM2G011355	ID_643	11	0	2.47	-2.94	2.59
GRMZM2G018080	ID_682	11	0	4.25	-4.32	1.59
GRMZM2G022054	ID_701	11	0	9.12	-12.87	2.4
GRMZM2G027695	ID_726	11	0	17.12	-28.38	2.11
GRMZM2G037265	ID_765	11	0	-1.68	-5.61	0.64
GRMZM2G050177	ID_816	11	0	-0.31	-1.82	1.44
GRMZM2G050550	ID_819	11	0	0.44	-0.79	0.19
GRMZM2G055898	ID_847	11	0	0.15	-4.47	-1.95
GRMZM2G083745	ID_990	11	0	0.54	-0.97	0.93
GRMZM2G095964	ID_1051	11	0	7.01	-14.1	-2.35
GRMZM2G113135	ID_1139	11	0	6.5	-10.91	-0.35
GRMZM2G122231	ID_1193	11	0	4.37	-11.68	2.84
GRMZM2G124143	ID_1200	11	0	3.67	-4.31	0
GRMZM2G125300	ID_1206	11	0	2.06	-9.27	-3.56
GRMZM2G132568	ID_1247	11	0	-1.36	-3.67	1.05
GRMZM2G134020	ID_1251	11	0	1.64	-9.14	4.07
GRMZM2G137596	ID_1266	11	0	-0.37	-3.74	2.34
GRMZM2G149556	ID_1316	11	0	5.64	-67.54	11.71
GRMZM2G151406	ID_1326	11	0	0.24	-1.64	0.18
GRMZM2G152908	ID_1333	11	0	-7.46	-25.09	-6.05
GRMZM2G158835	ID_1359	11	0	3.66	-43.46	7.39
GRMZM2G164542	ID_1378	11	0	0.21	-0.99	0.35
GRMZM2G175140	ID_1422	11	0	-0.9	-8.59	7.22
GRMZM2G326545	ID_1494	11	0	2.48	-4.34	0.22
GRMZM2G374302	ID_1573	11	0	1	-45.85	22.93
GRMZM2G429396	ID_1635	11	0	8.82	-16.74	20.06
GRMZM2G457309	ID_1686	11	0	0.31	-0.97	0.73
GRMZM2G464572	ID_50	10	0	10.96	-12.73	-16.12
GRMZM2G448142	ID_59	10	0	63.68	-213.87	-204.01
GRMZM2G394732	ID_94	10	0	0.63	-7.75	-5.19
GRMZM2G381709	ID_106	10	0	9.82	-15.41	-18.95
GRMZM2G361902	ID_116	10	0	2.76	-3.13	-3.87
GRMZM2G318213	ID_143	10	0	1.46	-7.69	-10.35
GRMZM2G175076	ID_170	10	0	1.02	-2.16	-0.73
GRMZM2G162868	ID_199	10	0	3.97	-31.22	-33.72
GRMZM2G157027	ID_219	10	0	0.84	-1.2	-0.84
GRMZM2G152135	ID_228	10	0	0.73	-15.62	-19.39
GRMZM2G132450	ID_273	10	0	-0.19	-1.29	-1.03
GRMZM2G106213	ID_322	10	0	0.45	-2.75	-2.2
GRMZM2G086835	ID_348	10	0	2.7	-4.92	-3.01
GRMZM2G065829	ID_393	10	0	2.33	-8.35	-10.5
GRMZM2G056431	ID_407	10	0	1.7	-1.77	-1.9
GRMZM2G015542	ID_474	10	0	-0.02	-1.27	-0.9
GRMZM2G013798	ID_480	10	0	24.67	-27.82	-31.73
GRMZM2G015024	ID_656	10	0	11.27	-12.29	-16.13
GRMZM2G015226	ID_658	10	0	-0.77	-3.13	-2.79
GRMZM2G016241	ID_664	10	0	-0.49	-2.19	-1.63
GRMZM2G056500	ID_851	10	0	9.05	-51.7	-52.81
GRMZM2G064356	ID_888	10	0	3.69	-7.47	-7.34
GRMZM2G070931	ID_917	10	0	0.75	-1.02	-0.31
GRMZM2G078090	ID_954	10	0	0.06	-2.83	-3.62
GRMZM2G083195	ID_985	10	0	0.71	-2.66	-2.03
GRMZM2G085301	ID_1001	10	0	1.07	-1.47	-0.96
GRMZM2G088511	ID_1015	10	0	7.8	-39.34	-23.12
GRMZM2G089673	ID_1021	10	0	0.09	-1.83	-1.87
GRMZM2G089698	ID_1023	10	0	2.82	-4.15	-5.78
GRMZM2G091233	ID_1032	10	0	1.93	-3.76	-3.13
GRMZM2G091857	ID_1040	10	0	1.73	-3.71	-4.96
GRMZM2G100714	ID_1070	10	0	0.81	-1.08	-1.5
GRMZM2G102683	ID_1076	10	0	0.47	-0.46	-0.58
GRMZM2G103647	ID_1085	10	0	15.17	-19.53	-27.36
GRMZM2G109627	ID_1121	10	0	-0.05	-4.57	-2.97
GRMZM2G110511	ID_1125	10	0	0.19	-1.39	-1.56
GRMZM2G122577	ID_1197	10	0	1.45	-2.41	-1.66
GRMZM2G127350	ID_1219	10	0	2.33	-3	-2.99
GRMZM2G131340	ID_1241	10	0	3.08	-16.34	-18.81
GRMZM2G134264	ID_1253	10	0	41.43	-281.83	-303.03
GRMZM2G143627	ID_1288	10	0	-2.63	-14.47	-10.58
GRMZM2G149335	ID_1312	10	0	1.32	-1.64	-0.93
GRMZM2G154667	ID_1343	10	0	17.45	-25.49	-27.72
GRMZM2G332562	ID_1506	10	0	-0.26	-1.32	-0.82
GRMZM2G385622	ID_1592	10	0	0.69	-4	-2.71
GRMZM2G404025	ID_1603	10	0	182.28	-204.48	-238.47
GRMZM2G450498	ID_1675	10	0	1.28	-2.29	-1.55
GRMZM2G472671	ID_1696	10	0	1.86	-8.28	-8.06
GRMZM2G517408	ID_1723	10	0	3.63	-33.11	-26.61
GRMZM5G895188	ID_1806	10	0	-1.88	-11.12	-14.38
GRMZM2G373522	ID_111	7	0	-4.02	-0.84	-1.24
GRMZM2G167008	ID_189	7	0	-12.11	3.06	2.88
GRMZM2G162768	ID_200	7	0	-5.42	0.1	1.52
GRMZM2G147966	ID_239	7	0	-2.42	-0.19	0.07
GRMZM2G090070	ID_343	7	0	-4.87	-0.12	-0.7
GRMZM2G072861	ID_372	7	0	-63.55	-4.21	9.22
GRMZM2G071401	ID_380	7	0	-6.76	-1.1	-2.8
GRMZM2G062042	ID_401	7	0	-55.26	-21.82	-0.08
GRMZM2G049536	ID_419	7	0	-2.25	-0.84	-0.86
GRMZM2G027723	ID_461	7	0	-0.78	0.27	-0.12
AC196066.3_FG003	ID_517	7	0	-3.08	-0.35	-0.45
AC194965.4_FG004	ID_518	7	0	-12.9	-5.66	-5.47
AC155622.2_FG004	ID_522	7	0	-3.94	0.19	0.78
AC190909.3_FG004	ID_524	7	0	-5.72	-2.6	-1.59
AC197672.3_FG002	ID_536	7	0	-1.28	0.12	0.54
GRMZM2G004087	ID_604	7	0	-9.34	-4.26	-3.28
GRMZM2G004641	ID_607	7	0	-5.65	0.63	2.32
GRMZM2G039610	ID_769	7	0	-1.42	-0.68	-0.26
GRMZM2G048377	ID_806	7	0	-11.55	-5.39	-2.57
GRMZM2G050481	ID_818	7	0	-2.25	-1.22	-0.96
GRMZM2G056495	ID_850	7	0	-7.75	-1.75	1.59
GRMZM2G056505	ID_852	7	0	-3.66	-0.95	-0.41
GRMZM2G058364	ID_859	7	0	-1.97	-0.42	0.3
GRMZM2G074083	ID_932	7	0	-7.42	-3.37	-3.75
GRMZM2G074572	ID_937	7	0	-4.97	-2.66	-1.72
GRMZM2G076152	ID_942	7	0	-38.75	-18.28	-15.82
GRMZM2G083504	ID_988	7	0	-6.01	-1.64	-2.46
GRMZM2G092627	ID_1041	7	0	-5.82	-2.92	-0.88
GRMZM2G104504	ID_1091	7	0	-8.12	-1.75	-1.8
GRMZM2G110145	ID_1123	7	0	-1.77	0.51	0.88
GRMZM2G146623	ID_1302	7	0	-1.54	-0.53	-0.68
GRMZM2G147854	ID_1306	7	0	-14.77	-6.32	-0.43
GRMZM2G154641	ID_1342	7	0	-2.93	-0.51	-0.11
GRMZM2G156692	ID_1352	7	0	-1.57	1.3	0.33
GRMZM2G165613	ID_1390	7	0	-18.91	0.55	1.43
GRMZM2G175150	ID_1423	7	0	-9.61	-2.2	0.6
GRMZM2G180478	ID_1448	7	0	-1.88	-0.56	-0.57
GRMZM2G318010	ID_1476	7	0	-7.7	-0.55	0.17
GRMZM2G319955	ID_1479	7	0	-1.74	0.72	-0.06
GRMZM2G323470	ID_1484	7	0	-2.57	-1.03	-0.89
GRMZM2G329040	ID_1500	7	0	-10.28	5.09	2.66
GRMZM2G358618	ID_1550	7	0	-11.55	1.82	-0.44
GRMZM2G369260	ID_1566	7	0	-8.65	-3.2	-2.28
GRMZM2G379929	ID_1585	7	0	-2.49	-0.32	0.25
GRMZM2G387890	ID_1594	7	0	-4.46	-1.12	0.82
GRMZM2G444378	ID_1659	7	0	-16.84	4.29	8.14
GRMZM2G473310	ID_1697	7	0	-5.17	-1.31	0.72
GRMZM2G473385	ID_1698	7	0	-1.52	-0.02	0.33
GRMZM2G477491	ID_1710	7	0	-1.23	0.76	0.47
GRMZM2G479760	ID_1715	7	0	-5.61	2.93	-0.33
GRMZM2G551565	ID_1730	7	0	-8.99	4.02	4.18
GRMZM2G553532	ID_1731	7	0	-6.06	-2.78	-1.73
GRMZM2G553687	ID_1732	7	0	-2.25	-0.93	-0.53
GRMZM5G824439	ID_1760	7	0	-4.89	-1.88	0.5
GRMZM5G840610	ID_1772	7	0	-5.39	-1.29	0.92
GRMZM5G850607	ID_1778	7	0	-12.2	-0.73	-2.35
GRMZM5G873335	ID_1789	7	0	-13.18	-6.99	-3.65
GRMZM5G891969	ID_1803	7	0	-14.98	6.05	8.85
GRMZM2G568636	ID_33	6	0	-120.87	-18.05	-234.52
GRMZM2G345717	ID_128	6	0	-1.29	-0.21	-1.05
GRMZM2G314520	ID_146	6	0	-10.74	-0.41	-6.18
GRMZM2G106190	ID_323	6	0	-8.36	-3.33	-7.65
GRMZM2G102959	ID_329	6	0	-1.9	-0.64	-1.77
GRMZM2G085078	ID_353	6	0	-4.24	1.53	-3.56
GRMZM2G081843	ID_355	6	0	-11.75	4.77	-13.58
GRMZM2G040441	ID_438	6	0	-1.95	-0.55	-1.37
GRMZM2G032619	ID_452	6	0	-21.04	-7.39	-23.65
AC194341.4_FG002	ID_526	6	0	-2.25	-0.89	-2.17
AC215260.3_FG003	ID_574	6	0	-3.17	-1.08	-1.98
AC225363.3_FG004	ID_576	6	0	-5.72	-1.09	-3
GRMZM2G015692	ID_661	6	0	-3.57	-0.1	-6.79
GRMZM2G076844	ID_947	6	0	-9.24	-2.25	-9.54
GRMZM2G084116	ID_993	6	0	-26.87	-5.73	-18.26
GRMZM2G103841	ID_1086	6	0	-2.54	1.18	-2.97
GRMZM2G117608	ID_1164	6	0	-8.79	-2.6	-9.08
GRMZM2G127821	ID_1223	6	0	-5.72	-1.81	-3.67
GRMZM2G137161	ID_1263	6	0	-1.47	-0.2	-1.95
GRMZM2G180283	ID_1446	6	0	-3.54	-1.36	-2.83
GRMZM2G181000	ID_1449	6	0	-6.93	-1.41	-11.95
GRMZM5G872399	ID_1787	6	0	-1.8	1.6	-2.59
GRMZM5G859220	ID_7	5	0	-4.98	-3.44	1.06
GRMZM2G702522	ID_32	5	0	-26.18	-15.03	9.86
GRMZM2G476762	ID_41	5	0	-75.64	-80.22	-15.65
GRMZM2G384884	ID_105	5	0	-3.35	-5.88	-0.53
GRMZM2G322817	ID_137	5	0	-7.6	-10.33	-1.96
GRMZM2G173413	ID_173	5	0	-21.24	-13.76	-3.53
GRMZM2G163542	ID_198	5	0	-6.99	-6.84	6.42
GRMZM2G162675	ID_203	5	0	-10.21	-10.6	7.58
GRMZM2G111014	ID_315	5	0	-4.46	-2.96	0.25
GRMZM2G091189	ID_342	5	0	-2.95	-7.62	3.93
GRMZM2G074267	ID_369	5	0	-0.72	-0.67	0.3
GRMZM2G066870	ID_390	5	0	-24.77	-28.37	-12.2
GRMZM2G054050	ID_413	5	0	-6.9	-5.32	4.83
GRMZM2G048497	ID_423	5	0	-2.79	-1.96	1.14
GRMZM2G040728	ID_437	5	0	-4.46	-8.83	1.43
GRMZM2G025231	ID_465	5	0	-5.11	-4.61	0.64
GRMZM2G002220	ID_499	5	0	-9.97	-11.1	-4.26
EF517601.1_FG009	ID_503	5	0	-2.33	-3.52	0.02
AC196043.3_FG005	ID_528	5	0	-16.15	-18.62	-7.2
AC196059.3_FG003	ID_529	5	0	-20.31	-13.53	-6.49
AC196158.3_FG002	ID_531	5	0	-30.05	-31.62	-14.57
AC205077.3_FG003	ID_551	5	0	-33.71	-16.78	2.56
AC205362.4_FG002	ID_553	5	0	-23.18	-23.11	-9.42
AC206582.2_FG002	ID_555	5	0	-25.16	-16.03	-0.62
AC209858.4_FG004	ID_562	5	0	-6.7	-4.88	-2.71
AC234160.1_FG001	ID_583	5	0	-5.65	-3.09	-0.72
AC234521.1_FG004	ID_588	5	0	-6.07	-6.03	1.73
GRMZM2G001247	ID_593	5	0	-6.1	-3.77	-0.1
GRMZM2G001877	ID_595	5	0	-2.84	-2.93	1.93
GRMZM2G002894	ID_598	5	0	-1.42	-1.06	-0.39
GRMZM2G003711	ID_600	5	0	-62.36	-34.16	-0.42
GRMZM2G006352	ID_615	5	0	-0.91	-0.74	0.77
GRMZM2G010545	ID_633	5	0	-0.74	-1.15	0.17
GRMZM2G013920	ID_651	5	0	-7.7	-7.82	-3.32
GRMZM2G016605	ID_667	5	0	-3.9	-4.49	3.58
GRMZM2G020104	ID_694	5	0	-2.68	-1.78	1.49
GRMZM2G031167	ID_734	5	0	-2.94	-2.56	-1.33
GRMZM2G039988	ID_773	5	0	-58.13	-62.13	35.2
GRMZM2G040890	ID_776	5	0	-2	-2.3	1
GRMZM2G041055	ID_778	5	0	-21.42	-22.96	-6.81
GRMZM2G042253	ID_783	5	0	-8.1	-8.51	9.07
GRMZM2G045128	ID_793	5	0	-6.38	-4.7	-0.35
GRMZM2G053588	ID_833	5	0	-5.67	-3.28	-1.36
GRMZM2G053669	ID_834	5	0	-17.91	-19.52	12.69
GRMZM2G058970	ID_861	5	0	-2.62	-1.67	0.15
GRMZM2G064250	ID_887	5	0	-10.65	-5.64	0.31
GRMZM2G071771	ID_921	5	0	-20.57	-18.4	-7.26
GRMZM2G079790	ID_968	5	0	-14.55	-14.38	-5.5
GRMZM2G080409	ID_969	5	0	-8.41	-8.34	-2.53
GRMZM2G082520	ID_978	5	0	-12.92	-11.66	-0.3
GRMZM2G084327	ID_994	5	0	-1.84	-2.27	1.89
GRMZM2G086450	ID_1008	5	0	-10.18	-5.42	2.76
GRMZM2G089163	ID_1017	5	0	-1.24	-0.88	-0.02
GRMZM2G093736	ID_1044	5	0	-1.32	-1.27	-0.31
GRMZM2G093809	ID_1045	5	0	-2.21	-1.13	-0.03
GRMZM2G100965	ID_1071	5	0	-7.43	-7.5	-1.77
GRMZM2G102860	ID_1078	5	0	-28.43	-25.79	13.17
GRMZM2G109547	ID_1119	5	0	-3.31	-2.24	-0.96
GRMZM2G117369	ID_1161	5	0	-3.85	-3.46	0.76
GRMZM2G121293	ID_1186	5	0	-7.12	-9.79	7.81
GRMZM2G122431	ID_1196	5	0	-8.21	-11.1	-2.93
GRMZM2G122805	ID_1199	5	0	-0.47	-1.6	1.06
GRMZM2G131026	ID_1237	5	0	-2.12	-1.56	0.01
GRMZM2G137964	ID_1269	5	0	-111.09	-112.79	99.16
GRMZM2G145201	ID_1295	5	0	-3.8	-2.37	0.97
GRMZM2G165042	ID_1383	5	0	-7	-4.76	-2.44
GRMZM2G165308	ID_1386	5	0	-9.38	-9.46	9.78
GRMZM2G168674	ID_1402	5	0	-8.88	-10.46	-4.09
GRMZM2G175406	ID_1425	5	0	-4.2	-4.12	-1.01
GRMZM2G175861	ID_1426	5	0	-2.41	-2.41	0.47
GRMZM2G302913	ID_1455	5	0	-1.9	-1.65	-0.32
GRMZM2G325477	ID_1489	5	0	-4.04	-5.46	0.39
GRMZM2G327311	ID_1496	5	0	-2.31	-1.29	0.05
GRMZM2G327564	ID_1497	5	0	-17.13	-23.41	-2.73
GRMZM2G340297	ID_1519	5	0	-6.39	-7.9	5.61
GRMZM2G345700	ID_1528	5	0	-99.86	-88.63	8.34
GRMZM2G370162	ID_1567	5	0	-5.15	-2.6	-0.2
GRMZM2G435536	ID_1642	5	0	-8.57	-9.64	5.06
GRMZM2G439337	ID_1649	5	0	-7.75	-8.09	5.63
GRMZM2G449941	ID_1673	5	0	-6.96	-5.67	4.84
GRMZM2G455476	ID_1682	5	0	-1.4	-1.58	-0.68
GRMZM2G465685	ID_1692	5	0	-10.29	-11.15	6.36
GRMZM2G475899	ID_1707	5	0	-2.68	-8.09	5.29
GRMZM2G701969	ID_1742	5	0	-5.65	-6.69	0.5
GRMZM5G877489	ID_1790	5	0	-4.17	-5.01	2.37
GRMZM5G879665	ID_1796	5	0	-2.03	-3.24	-0.01
GRMZM5G891425	ID_1801	5	0	-4.17	-4.06	3.53
GRMZM5G892723	ID_1804	5	0	-13.3	-11.77	11.05
GRMZM5G848182	ID_14	4	0	-14.78	-8.92	-11.44
GRMZM5G843972	ID_17	4	0	-9.53	-6.48	-9.29
GRMZM2G480106	ID_36	4	0	-3.51	-2.99	-3.32
GRMZM2G390124	ID_99	4	0	-18.92	-21.83	-25.67
GRMZM2G357834	ID_122	4	0	-25.73	-24.56	-30.03
GRMZM2G345493	ID_129	4	0	-362.84	-362.42	-429.9
GRMZM2G344163	ID_130	4	0	-10.69	-8.92	-7.23
GRMZM2G181371	ID_155	4	0	-16.4	-16.24	-10.38
GRMZM2G178038	ID_160	4	0	-7.29	-6.84	-9.66
GRMZM2G175995	ID_165	4	0	-16.82	-19.65	-18.91
GRMZM2G154628	ID_224	4	0	-14.06	-13.3	-14.69
GRMZM2G137535	ID_262	4	0	-103.41	-107.8	-100.26
GRMZM2G135013	ID_265	4	0	-4.58	-4.54	-5.57
GRMZM2G112524	ID_311	4	0	-7.66	-8.03	-8.42
GRMZM2G112284	ID_313	4	0	-21.03	-22.69	-16.87
GRMZM2G111208	ID_314	4	0	-22.45	-17.5	-25.94
GRMZM2G097641	ID_335	4	0	-1.8	-1.54	-2.04
GRMZM2G086841	ID_347	4	0	-11.16	-10.48	-12.89
GRMZM2G058573	ID_405	4	0	-1.12	-0.55	-0.57
GRMZM2G057616	ID_406	4	0	-21.08	-17.88	-20.05
GRMZM2G046601	ID_425	4	0	-2.9	-2.4	-2.42
GRMZM2G017319	ID_472	4	0	-5.65	-5.05	-7.28
GRMZM2G013398	ID_484	4	0	-5.13	-5.22	-5.32
GRMZM2G005433	ID_495	4	0	-37.13	-21	-37.95
AC197047.3_FG001	ID_533	4	0	-3.88	-2.87	-3.5
AC199705.3_FG008	ID_542	4	0	-1.58	-1.06	-1.58
AC233914.1_FG001	ID_580	4	0	-25.53	-13.53	-12.77
GRMZM2G000221	ID_590	4	0	-17.7	-18.67	-16.79
GRMZM2G000829	ID_592	4	0	-8.38	-6.54	-7.9
GRMZM2G006480	ID_617	4	0	-6.49	-4.61	-6.46
GRMZM2G007053	ID_619	4	0	-1.65	-1.56	-0.95
GRMZM2G007939	ID_625	4	0	-230.87	-248.74	-266.67
GRMZM2G008751	ID_629	4	0	-5.91	-5.17	-4.59
GRMZM2G011169	ID_640	4	0	-3.32	-2.38	-1.74
GRMZM2G014902	ID_655	4	0	-157.1	-148.06	-202.38
GRMZM2G027972	ID_727	4	0	-2.36	-3.01	-2.97
GRMZM2G035370	ID_750	4	0	-6.3	-5.67	-3.45
GRMZM2G035749	ID_752	4	0	-25.88	-35.29	-32.05
GRMZM2G043878	ID_787	4	0	-9.8	-11.1	-11.94
GRMZM2G046583	ID_801	4	0	-7.63	-7.12	-8.53
GRMZM2G050961	ID_822	4	0	-31.03	-26.46	-17.19
GRMZM2G054405	ID_839	4	0	-14.67	-13.55	-10.29
GRMZM2G069649	ID_911	4	0	-4.84	-5.42	-5.84
GRMZM2G075438	ID_940	4	0	-22.75	-28.01	-26.37
GRMZM2G076602	ID_945	4	0	-9.75	-13.07	-12.21
GRMZM2G083058	ID_982	4	0	-40.59	-45.31	-50.15
GRMZM2G089750	ID_1024	4	0	-3.01	-3.16	-1.66
GRMZM2G089836	ID_1025	4	0	-35.51	-32.91	-39.14
GRMZM2G090576	ID_1028	4	0	-5.09	-3.2	-3.72
GRMZM2G091456	ID_1035	4	0	-6.07	-4.07	-5.69
GRMZM2G095124	ID_1048	4	0	-10.99	-6.78	-8.71
GRMZM2G097457	ID_1057	4	0	-10.13	-7.59	-8.71
GRMZM2G103152	ID_1080	4	0	-9.93	-9.14	-9.82
GRMZM2G105604	ID_1095	4	0	-10.73	-7.15	-11.25
GRMZM2G109405	ID_1118	4	0	-14.7	-15.18	-13.74
GRMZM2G112656	ID_1136	4	0	-4.85	-5.67	-4.14
GRMZM2G113486	ID_1143	4	0	-4.92	-5.84	-6.72
GRMZM2G114398	ID_1146	4	0	-56.88	-36.81	-55.58
GRMZM2G117754	ID_1165	4	0	-4.84	-5.18	-6.18
GRMZM2G118345	ID_1171	4	0	-1.25	-0.58	-0.83
GRMZM2G124684	ID_1202	4	0	-2.33	-1.89	-2.31
GRMZM2G125853	ID_1213	4	0	-66.03	-67.22	-64.33
GRMZM2G126772	ID_1217	4	0	-7.74	-8.4	-4.99
GRMZM2G136857	ID_1261	4	0	-53.37	-68.69	-70.06
GRMZM2G139689	ID_1276	4	0	-12.48	-10.35	-14.16
GRMZM2G140107	ID_1279	4	0	-21.13	-21.75	-27.33
GRMZM2G145461	ID_1296	4	0	-32.38	-34.14	-31.59
GRMZM2G153103	ID_1334	4	0	-19.81	-24.74	-21.99
GRMZM2G153536	ID_1336	4	0	-2.97	-3.4	-3.32
GRMZM2G171616	ID_1415	4	0	-3.93	-5.12	-4.82
GRMZM2G326235	ID_1492	4	0	-63.33	-85.19	-63.79
GRMZM2G339122	ID_1518	4	0	-6.59	-6.72	-3.87
GRMZM2G343048	ID_1524	4	0	-5.03	-6.23	-6.38
GRMZM2G348956	ID_1536	4	0	-4.1	-3.34	-3.59
GRMZM2G379002	ID_1583	4	0	-25.75	-24.98	-30.93
GRMZM2G421256	ID_1624	4	0	-4.09	-4.39	-4.03
GRMZM2G440208	ID_1651	4	0	-4.47	-2.54	-2.45
GRMZM2G453320	ID_1677	4	0	-1.52	-1.45	-0.94
GRMZM2G455122	ID_1679	4	0	-19.91	-21.06	-16.43
GRMZM2G468111	ID_1693	4	0	-2.18	-2.37	-2.5
GRMZM2G483490	ID_1716	4	0	-7.76	-8.46	-8.46
GRMZM2G587231	ID_1737	4	0	-3.31	-3.62	-3.45
GRMZM5G804216	ID_1748	4	0	-21.37	-20.61	-20.5
GRMZM5G877838	ID_1793	4	0	-18.18	-11.11	-12.95
GRMZM2G428027	ID_65	3	0	-0.72	-0.4	-1.02
GRMZM2G400961	ID_85	3	0	-1.34	-1.19	-1.74
GRMZM2G395114	ID_93	3	0	-26.2	-21.34	-76.84
GRMZM2G392513	ID_97	3	0	-4.99	-6.05	-14.45
GRMZM2G389155	ID_102	3	0	-2.35	-1.3	-2.96
GRMZM2G175401	ID_169	3	0	-44.03	-47.94	-89.79
GRMZM2G166971	ID_190	3	0	-18.17	-16.16	-41.99
GRMZM2G157369	ID_216	3	0	-37.41	-48.76	-111.03
GRMZM2G140924	ID_252	3	0	-12.19	-11.31	-25.49
GRMZM2G138455	ID_258	3	0	-1.2	-1.04	-3.95
GRMZM2G136042	ID_264	3	0	-3.63	-3.84	-5.69
GRMZM2G124335	ID_286	3	0	-12.38	-14.51	-24.52
GRMZM2G121264	ID_292	3	0	-35.2	-32.5	-48.7
GRMZM2G079381	ID_362	3	0	-27.06	-24.58	-68.63
GRMZM2G077436	ID_365	3	0	-30.99	-22.94	-61.89
GRMZM2G071996	ID_376	3	0	-76.24	-80.61	-218.63
GRMZM2G069722	ID_387	3	0	-8.55	-5.94	-11.13
GRMZM2G068557	ID_388	3	0	-133.86	-143.2	-213.73
GRMZM2G048561	ID_421	3	0	-3.33	-3.19	-4.99
GRMZM2G038291	ID_442	3	0	-3.1	-4.87	-14.17
AC208897.3_FG004	ID_559	3	0	-15.91	-16.91	-25.26
AC234159.1_FG002	ID_582	3	0	-8.26	-3.96	-21.47
GRMZM2G004694	ID_609	3	0	-0.74	-0.66	-2.5
GRMZM2G006363	ID_616	3	0	-12.83	-13.58	-24.62
GRMZM2G017229	ID_672	3	0	-72.2	-42.02	-95.45
GRMZM2G018074	ID_681	3	0	-10.78	-7.85	-13.39
GRMZM2G031568	ID_738	3	0	-12.39	-18.52	-40.58
GRMZM2G041022	ID_777	3	0	-6.36	-7.51	-10.12
GRMZM2G052658	ID_828	3	0	-10.92	-7.07	-15.49
GRMZM2G055699	ID_846	3	0	-11.73	-12.94	-17.35
GRMZM2G057451	ID_855	3	0	-5.98	-5.32	-13.52
GRMZM2G062129	ID_874	3	0	-23.3	-17.02	-43.24
GRMZM2G065244	ID_892	3	0	-6.13	-7.13	-13.29
GRMZM2G083285	ID_986	3	0	-1.49	-1.76	-3.39
GRMZM2G087165	ID_1009	3	0	-2.79	-2.72	-5.36
GRMZM2G102923	ID_1079	3	0	-5.05	-5.81	-9.91
GRMZM2G108514	ID_1110	3	0	-0.78	-0.5	-1.36
GRMZM2G114182	ID_1145	3	0	-10.26	-10.02	-14.73
GRMZM2G125571	ID_1210	3	0	-35.19	-39.83	-65.68
GRMZM2G137861	ID_1268	3	0	-1.22	-0.67	-1.36
GRMZM2G145041	ID_1294	3	0	-20.02	-25.53	-35.94
GRMZM2G151230	ID_1324	3	0	-3.8	-3.58	-5.91
GRMZM2G157269	ID_1354	3	0	-16.32	-12.27	-23.39
GRMZM2G168474	ID_1401	3	0	-2.57	-2.09	-3.45
GRMZM2G175265	ID_1424	3	0	-50.81	-40.66	-65.76
GRMZM2G324390	ID_1486	3	0	-6.88	-9.05	-21.73
GRMZM2G342738	ID_1523	3	0	-6.04	-6.27	-12.44
GRMZM2G376416	ID_1578	3	0	-33.91	-24.96	-42.69
GRMZM2G382273	ID_1589	3	0	-2.12	-1.56	-2.58
GRMZM2G395778	ID_1599	3	0	-7.43	-8.78	-12.59
GRMZM2G449160	ID_1669	3	0	-28.25	-18.06	-66.79
GRMZM2G474769	ID_1702	3	0	-132.81	-144.9	-215.98
GRMZM5G893912	ID_1805	3	0	-0.98	-1.25	-2.55
GRMZM2G174585	ID_171	2	0	-0.39	-1.29	-0.45
GRMZM2G154987	ID_221	2	0	-2.54	-4.98	-1.93
GRMZM2G154648	ID_223	2	0	-57.36	-97.91	-38.63
GRMZM2G008108	ID_626	2	0	-6.59	-12.34	-2.73
GRMZM2G010731	ID_634	2	0	-19.51	-24.37	-14.25
GRMZM2G011598	ID_644	2	0	-2.62	-4.53	-2.97
GRMZM2G018027	ID_680	2	0	-6.61	-11.24	-4.55
GRMZM2G024196	ID_708	2	0	-1.68	-2.64	-0.81
GRMZM2G050131	ID_815	2	0	-22.23	-37.7	-26.09
GRMZM2G057959	ID_856	2	0	-1.06	-2.59	-0.97
GRMZM2G065585	ID_893	2	0	-0.57	-3.55	-1.5
GRMZM2G074824	ID_938	2	0	-3.38	-8.51	-2.63
GRMZM2G084570	ID_996	2	0	-3.36	-7.13	-5.06
GRMZM2G090872	ID_1031	2	0	-5.23	-7.35	-3.69
GRMZM2G095252	ID_1049	2	0	-6.03	-21	-13.22
GRMZM2G113421	ID_1141	2	0	-5.41	-9.8	-6.9
GRMZM2G114945	ID_1150	2	0	-20.88	-36.13	-24.68
GRMZM2G116966	ID_1159	2	0	-39.55	-54.72	-30.97
GRMZM2G154332	ID_1338	2	0	-3.09	-10.85	-3.51
GRMZM2G176595	ID_1428	2	0	-3.79	-4.95	-3.14
GRMZM2G302604	ID_1454	2	0	-2.42	-4.95	-1.36
GRMZM2G346312	ID_1530	2	0	-88.9	-101.51	-51.87
GRMZM5G813055	ID_1753	2	0	-1.25	-2.61	-1.03
GRMZM5G872934	ID_1788	2	0	-0.62	-1.15	-0.63
GRMZM5G838433	ID_19	1	0	-1.19	-3.55	-2.73
GRMZM2G400725	ID_86	1	0	-0.89	-1.98	-1.42
GRMZM2G391596	ID_98	1	0	-4.45	-8.46	-7.73
GRMZM2G380088	ID_107	1	0	-4.08	-8.48	-7.89
GRMZM2G150791	ID_231	1	0	-4.51	-12.48	-13.45
GRMZM2G147882	ID_240	1	0	-12.07	-21.03	-23.7
GRMZM2G137582	ID_261	1	0	-2	-3.15	-2.89
GRMZM2G115422	ID_309	1	0	-2.81	-4.05	-4.16
GRMZM2G081032	ID_358	1	0	-3.06	-4.73	-4.67
GRMZM2G054905	ID_411	1	0	-3.77	-6.32	-7.07
GRMZM2G042412	ID_432	1	0	-1.36	-2.73	-2.62
EF517601.1_FG025	ID_589	1	0	-9.95	-12.52	-15.71
GRMZM2G007489	ID_622	1	0	-1.11	-1.41	-1.83
GRMZM2G015136	ID_657	1	0	-3.71	-6.73	-5.89
GRMZM2G026188	ID_718	1	0	-1.86	-3.76	-3.58
GRMZM2G034611	ID_747	1	0	-5.95	-8.6	-7.57
GRMZM2G035805	ID_754	1	0	-7.85	-11.64	-14.64
GRMZM2G050890	ID_821	1	0	-0.68	-1.64	-1.85
GRMZM2G052671	ID_829	1	0	-2.07	-3.76	-2.96
GRMZM2G063151	ID_882	1	0	-8.73	-11.67	-13.56
GRMZM2G077914	ID_952	1	0	-2.34	-5.2	-4.07
GRMZM2G082335	ID_977	1	0	-2.13	-3.77	-4.63
GRMZM2G097141	ID_1056	1	0	-32.5	-42.49	-48.05
GRMZM2G100336	ID_1066	1	0	-2.52	-5.78	-5.6
GRMZM2G103250	ID_1082	1	0	-2.8	-4.17	-3.98
GRMZM2G108480	ID_1109	1	0	-19.22	-37.44	-29.5
GRMZM2G111975	ID_1133	1	0	-4.42	-7.7	-7.74
GRMZM2G115566	ID_1154	1	0	-19.49	-34.53	-33.22
GRMZM2G119691	ID_1178	1	0	-17.99	-44.69	-45.42
GRMZM2G127031	ID_1218	1	0	-2.04	-3.71	-3.28
GRMZM2G128219	ID_1224	1	0	-6.6	-13.2	-14.32
GRMZM2G132547	ID_1246	1	0	-6.35	-10.51	-9.21
GRMZM2G132704	ID_1248	1	0	-0.8	-1.42	-1.41
GRMZM2G141353	ID_1283	1	0	-19.61	-28	-31.54
GRMZM2G151468	ID_1327	1	0	-1.72	-2.78	-2.92
GRMZM2G154505	ID_1340	1	0	-49.93	-109.66	-113.14
GRMZM2G173710	ID_1417	1	0	-81.99	-124.4	-122.01
GRMZM2G330302	ID_1504	1	0	-1.49	-2.05	-2.01
GRMZM2G334181	ID_1509	1	0	-5.99	-9.62	-10.74
GRMZM2G346861	ID_1533	1	0	-15.88	-20.37	-22.91
GRMZM2G350225	ID_1538	1	0	-1.29	-4.44	-3.35
GRMZM2G445616	ID_1661	1	0	-16.98	-31.03	-23.36
GRMZM2G450866	ID_1676	1	0	-2	-5.33	-5.27
GRMZM2G475128	ID_1703	1	0	-2.73	-4	-4.83
GRMZM5G817759	ID_1756	1	0	-9.03	-13.34	-15.24
GRMZM5G854731	ID_1783	1	0	-3.52	-7.13	-5.21
GRMZM5G878379	ID_1795	1	0	-0.5	-1.63	-1.46

## Sheet: SHZ4
Gene ID	SPOT	Profile	S3H4	S4H4	S5H4	S6H4
GRMZM2G163406	ID_22	20	0	178.81	193.7	50.67
GRMZM2G150688	ID_49	20	0	101.41	134.42	14.33
GRMZM5G809335	ID_60	20	0	8.1	9.05	-1.63
GRMZM2G417715	ID_115	20	0	8.54	9.89	2.14
GRMZM2G008287	ID_129	20	0	2.83	3.23	-0.83
GRMZM2G052255	ID_132	20	0	6	4.32	-1
GRMZM2G100505	ID_157	20	0	6.43	7.14	1.67
GRMZM2G138176	ID_158	20	0	6.97	5.99	2.8
GRMZM2G154041	ID_159	20	0	4.02	3.94	-0.64
GRMZM2G381933	ID_172	20	0	3.09	1.79	-0.79
GRMZM2G125813	ID_205	20	0	11.9	6.53	-1.38
GRMZM2G318956	ID_206	20	0	2.01	2.93	-1.89
GRMZM2G413253	ID_208	20	0	2.21	1.96	0.23
GRMZM2G145012	ID_262	20	0	4.27	3.98	0.7
GRMZM2G066197	ID_414	20	0	118.28	214.79	-57.66
GRMZM2G364748	ID_415	20	0	69.12	88.71	-17.84
GRMZM2G115357	ID_416	20	0	72.37	101.24	-40.88
GRMZM5G819965	ID_423	20	0	11.39	19.46	-12.2
GRMZM2G136910	ID_428	20	0	69.95	44.12	16.79
GRMZM2G137802	ID_430	20	0	5.89	6.84	-2.06
GRMZM2G078324	ID_434	20	0	2.01	2.85	0.44
GRMZM2G436593	ID_461	20	0	42.76	101.89	-27.76
GRMZM2G181551	ID_462	20	0	151.28	356.09	-73.67
GRMZM2G333980	ID_464	20	0	47.28	38.17	-27.77
GRMZM2G056772	ID_468	20	0	55.83	54.25	-59.77
GRMZM5G862540	ID_471	20	0	45.35	41.16	-11.62
GRMZM2G006676	ID_476	20	0	36.73	37.19	5.43
GRMZM2G045664	ID_477	20	0	40.5	41.81	-26.5
GRMZM2G106792	ID_480	20	0	51.51	85.23	-20.02
GRMZM2G015605	ID_483	20	0	33.86	69.48	-6.71
GRMZM2G144648	ID_486	20	0	39.35	49.01	0.26
GRMZM2G339736	ID_487	20	0	19.46	33.61	-9.13
GRMZM2G028286	ID_490	20	0	18.05	34.2	-4.37
GRMZM2G175642	ID_493	20	0	19.9	31.35	-13.31
GRMZM2G174347	ID_494	20	0	17.12	46.07	-20.93
GRMZM2G071154	ID_496	20	0	15.63	20.43	-10.41
GRMZM2G061487	ID_497	20	0	21.33	47.63	-18.26
GRMZM2G366392	ID_499	20	0	9.61	16.41	-8.33
GRMZM2G035579	ID_500	20	0	25.98	24.79	-14.8
GRMZM2G376825	ID_501	20	0	22.82	31.99	-10.86
GRMZM2G104942	ID_502	20	0	49.63	47.21	-5.13
GRMZM2G377215	ID_503	20	0	20.28	38.84	-14.96
GRMZM2G132978	ID_504	20	0	13.84	26.8	-17.38
GRMZM2G474755	ID_506	20	0	35.71	58.37	-26.59
GRMZM2G027825	ID_507	20	0	14.36	12.96	-3.16
GRMZM5G845782	ID_508	20	0	47.14	75.51	-8.61
GRMZM2G034764	ID_510	20	0	20.19	24.95	-10.14
GRMZM2G045178	ID_511	20	0	44.89	74.4	-7.21
GRMZM2G436295	ID_512	20	0	69.92	52.74	-7.82
GRMZM2G425004	ID_514	20	0	31.94	55.15	-21.85
GRMZM2G057509	ID_516	20	0	24.57	39.85	-7.69
GRMZM2G104118	ID_521	20	0	13.59	24.27	0.48
GRMZM2G001930	ID_524	20	0	13.35	19.46	-6.22
GRMZM2G135501	ID_528	20	0	11.27	24.13	-8.51
GRMZM2G170120	ID_529	20	0	13.1	10.86	-8.92
GRMZM2G132185	ID_530	20	0	12.41	16.99	-10.82
GRMZM2G003937	ID_531	20	0	16	18.21	-11.76
GRMZM2G171423	ID_532	20	0	39.56	30.91	-11.21
GRMZM2G340807	ID_534	20	0	8.61	22.57	-10.9
GRMZM2G135743	ID_535	20	0	4.86	7.59	-5.02
GRMZM2G134054	ID_536	20	0	98.78	59.31	19.38
GRMZM2G142709	ID_538	20	0	12	17.28	-8.65
GRMZM5G843302	ID_540	20	0	37.44	20.79	-0.03
GRMZM2G106819	ID_541	20	0	19.59	36.03	-3.21
GRMZM2G083894	ID_543	20	0	13.13	30.46	-7.97
GRMZM2G134797	ID_544	20	0	75.13	48.68	11.65
AC210204.3_FG002	ID_545	20	0	9.19	8.97	-7.61
GRMZM2G312661	ID_548	20	0	11.51	12.28	-12.72
GRMZM5G872373	ID_549	20	0	9.44	17.4	-5
GRMZM2G423917	ID_551	20	0	11.68	26.66	-11.92
GRMZM2G051151	ID_552	20	0	15.12	16.78	-0.02
GRMZM2G071277	ID_554	20	0	9.11	26.86	-13.82
GRMZM2G404126	ID_555	20	0	13.06	15.94	-6.56
GRMZM2G173063	ID_557	20	0	3.12	1.91	-0.44
GRMZM2G097704	ID_562	20	0	6.62	15.47	-6.14
GRMZM2G077809	ID_563	20	0	8.35	7.12	-2.88
GRMZM2G032766	ID_566	20	0	3.77	4.87	-4.79
GRMZM2G159759	ID_567	20	0	10.55	22.75	-3.83
GRMZM2G147544	ID_568	20	0	10.15	10.9	-7.6
GRMZM2G123029	ID_570	20	0	7.22	9	0.71
GRMZM2G441903	ID_571	20	0	6.71	5.54	-2.41
GRMZM2G144024	ID_572	20	0	28.97	39.86	-2.92
GRMZM2G401040	ID_573	20	0	9.35	21.28	-12.06
GRMZM5G876379	ID_574	20	0	8.27	17.91	-0.9
GRMZM2G111987	ID_580	20	0	10.8	20.1	-6.03
GRMZM2G105466	ID_581	20	0	4.28	4.17	-2.76
GRMZM2G049912	ID_582	20	0	7.56	15.5	-0.72
GRMZM2G053987	ID_583	20	0	9.66	16.43	-1.24
GRMZM2G080940	ID_586	20	0	5.79	6.37	-1.85
GRMZM2G132095	ID_587	20	0	9.35	18	-5.62
GRMZM2G064962	ID_589	20	0	12.59	10.44	0.63
GRMZM2G119168	ID_599	20	0	10.13	8.18	-3.75
GRMZM2G173630	ID_603	20	0	4.61	8.69	-3.61
GRMZM2G113158	ID_604	20	0	5.4	9.17	1.03
GRMZM2G016370	ID_605	20	0	11.23	9.75	-0.6
GRMZM2G105348	ID_608	20	0	18.52	18.29	-6.45
GRMZM2G165679	ID_611	20	0	8.54	15.26	-0.51
GRMZM2G477503	ID_612	20	0	15.41	8.04	-1.53
GRMZM2G300135	ID_616	20	0	3.86	7.84	-4.01
GRMZM2G135839	ID_617	20	0	8.82	6.56	-0.19
GRMZM2G399383	ID_618	20	0	4.35	6.03	-1.5
GRMZM2G012306	ID_625	20	0	3.82	3.93	-1.93
GRMZM2G475536	ID_626	20	0	39.47	26.77	-1.84
GRMZM5G829946	ID_628	20	0	11.62	10.58	-0.78
GRMZM2G056014	ID_629	20	0	5.11	6.81	-1.34
GRMZM5G885700	ID_631	20	0	3.12	6.52	-0.89
GRMZM2G364612	ID_633	20	0	6.97	12.73	-3.26
GRMZM5G886257	ID_636	20	0	2.59	1.79	-1.19
GRMZM2G052720	ID_637	20	0	5.48	10.08	-3.13
GRMZM5G863344	ID_639	20	0	4.04	8.94	-1.87
GRMZM2G030305	ID_642	20	0	6.12	9.67	-2.61
GRMZM2G042323	ID_643	20	0	14.3	8.24	-0.01
GRMZM2G428040	ID_647	20	0	3.98	7.54	-3.95
GRMZM2G048450	ID_654	20	0	1.52	3.35	-0.74
GRMZM2G159119	ID_655	20	0	6.96	4.49	-1.03
GRMZM2G032160	ID_656	20	0	3.38	6.17	-1.59
GRMZM2G056407	ID_657	20	0	1.25	1.85	-1.38
GRMZM2G091124	ID_661	20	0	3.27	4.03	-2.12
GRMZM2G129018	ID_664	20	0	6.41	12.31	-1.62
GRMZM2G125034	ID_668	20	0	2.64	2.63	-1.75
GRMZM2G059590	ID_669	20	0	2.2	2.72	0.36
GRMZM2G333811	ID_671	20	0	5.85	7.73	-0.86
GRMZM2G303964	ID_672	20	0	7.39	12.77	-2.9
GRMZM5G874270	ID_673	20	0	4.96	3.93	-1.16
GRMZM2G437912	ID_675	20	0	3.1	4.92	-3.82
GRMZM2G125001	ID_676	20	0	22.2	13.48	-0.1
GRMZM2G031447	ID_680	20	0	2.33	3.64	-0.53
GRMZM2G144668	ID_682	20	0	2.77	5.26	-1.12
GRMZM2G414540	ID_684	20	0	4.93	9.17	-1.71
GRMZM2G101409	ID_686	20	0	0.82	2.12	-1.59
GRMZM2G090493	ID_690	20	0	1.92	3.31	-1.24
GRMZM2G323387	ID_691	20	0	5.43	6.67	-1.73
AC205471.4_FG007	ID_692	20	0	1.94	2.16	0.18
GRMZM2G102923	ID_693	20	0	1.24	3.22	-1.3
GRMZM2G149636	ID_701	20	0	1.69	1.47	-1.55
GRMZM2G096753	ID_702	20	0	7.69	11.53	-1.51
GRMZM2G134067	ID_704	20	0	2.06	2.52	-1.06
GRMZM2G378106	ID_705	20	0	1.78	2.88	-0.95
GRMZM2G061723	ID_708	20	0	2.22	2.83	-1.01
GRMZM2G334165	ID_709	20	0	3.3	4.23	0.88
GRMZM2G406099	ID_714	20	0	3.9	6.19	-0.7
GRMZM2G042756	ID_715	20	0	4.57	6.94	-1.98
GRMZM2G069694	ID_717	20	0	11.27	6.24	-1.99
GRMZM2G156150	ID_719	20	0	13.73	7.24	-0.08
AC233899.1_FG005	ID_723	20	0	3.64	8.04	-1.9
GRMZM2G054807	ID_724	20	0	2.53	2.95	-1.72
GRMZM2G420715	ID_727	20	0	3.63	3.31	-0.88
GRMZM2G163418	ID_728	20	0	1.82	4.2	-1.51
GRMZM5G864815	ID_729	20	0	3.92	4.88	0.69
GRMZM2G152739	ID_730	20	0	3.37	4.93	0.22
GRMZM2G443728	ID_733	20	0	2.38	3.69	0.01
GRMZM2G104843	ID_734	20	0	3.24	7.49	-0.99
GRMZM2G086841	ID_737	20	0	4.58	5.67	-1.11
GRMZM2G702991	ID_738	20	0	2.41	2.22	-0.97
GRMZM2G142779	ID_739	20	0	3.2	3.91	-0.27
GRMZM2G112377	ID_740	20	0	35.12	38.87	1.1
GRMZM2G159500	ID_741	20	0	1.3	1.13	0.03
GRMZM2G093776	ID_743	20	0	1.43	2.44	-0.02
GRMZM2G041549	ID_744	20	0	0.52	1.43	-0.73
GRMZM2G177227	ID_745	20	0	3.03	3.1	-0.58
GRMZM2G436020	ID_746	20	0	3.27	7.61	-1.01
GRMZM2G015908	ID_747	20	0	12.86	14	-0.17
GRMZM2G366910	ID_749	20	0	4.15	7.35	-1.39
GRMZM2G181637	ID_753	20	0	1.09	1.34	-0.08
GRMZM2G040736	ID_754	20	0	1.64	3.39	-0.63
GRMZM2G083402	ID_758	20	0	1.29	0.82	-0.08
GRMZM2G027958	ID_760	20	0	1.37	3.09	-0.81
GRMZM2G031001	ID_767	20	0	1.2	0.83	0.18
GRMZM2G136884	ID_768	20	0	0.9	2.1	-0.47
GRMZM2G114036	ID_771	20	0	2.22	1.7	-0.76
GRMZM5G838098	ID_774	20	0	2.51	3.5	-0.9
GRMZM2G125571	ID_780	20	0	2.73	5.65	-0.69
GRMZM2G104626	ID_781	20	0	0.85	1.08	0.03
GRMZM2G013236	ID_786	20	0	1.12	2.41	-0.06
GRMZM2G104836	ID_788	20	0	0.94	1.07	-0.12
GRMZM2G116685	ID_789	20	0	0.94	1.74	-0.27
GRMZM2G356128	ID_790	20	0	4.86	2.27	-0.21
GRMZM2G051683	ID_795	20	0	1.42	2.78	-0.48
GRMZM2G118172	ID_796	20	0	3.26	4.83	-0.46
GRMZM2G051571	ID_799	20	0	2.67	3.25	-0.3
GRMZM2G370745	ID_800	20	0	2.47	2.3	0.44
GRMZM2G326707	ID_801	20	0	3.93	3.84	-0.03
GRMZM2G083474	ID_804	20	0	0.57	1.34	-0.2
GRMZM2G058149	ID_807	20	0	1.04	2.1	-0.38
GRMZM5G819464	ID_811	20	0	0.85	1.24	-0.08
GRMZM2G158328	ID_814	20	0	1.52	1.3	-0.08
GRMZM2G017197	ID_815	20	0	0.91	1.21	-0.1
GRMZM2G114801	ID_816	20	0	0.89	0.76	-0.22
GRMZM2G010702	ID_817	20	0	0.61	1.09	-0.29
GRMZM2G176472	ID_818	20	0	0.76	1.61	0.02
GRMZM2G361210	ID_819	20	0	2.05	3.13	-0.28
AC191575.2_FG001	ID_822	20	0	5.11	3.2	0.27
GRMZM2G159179	ID_823	20	0	1.02	1.61	-0.15
GRMZM2G333183	ID_826	20	0	1.3	1.16	0.04
GRMZM2G162396	ID_828	20	0	2.2	2.59	-0.12
GRMZM2G146108	ID_844	20	0	1.12	1.35	0
GRMZM2G148726	ID_845	20	0	0.91	1.35	0
GRMZM2G085086	ID_1010	20	0	55.81	82.78	-31.76
GRMZM2G110145	ID_1012	20	0	39.05	33.81	-2.55
GRMZM2G074792	ID_1017	20	0	22.18	45.7	-7.16
GRMZM2G567897	ID_1021	20	0	8.34	12.4	-9.96
GRMZM2G177340	ID_1022	20	0	26.96	51.23	-12.09
GRMZM2G035103	ID_1023	20	0	18.11	31.82	-10.49
GRMZM2G019246	ID_1027	20	0	6.35	12.62	-2.85
GRMZM2G043857	ID_1034	20	0	5.37	5.99	-0.19
GRMZM2G076584	ID_1037	20	0	7.4	12.71	-2.31
GRMZM2G012724	ID_1038	20	0	3.05	7.5	-1.81
GRMZM2G082959	ID_1040	20	0	2.4	3.92	-1.84
GRMZM2G066428	ID_1041	20	0	2.11	2.86	-1.47
GRMZM2G344388	ID_1042	20	0	2.78	3.95	-1.27
GRMZM2G088819	ID_1043	20	0	4.8	2.76	-0.87
GRMZM2G137341	ID_1044	20	0	2.75	2.45	-0.47
GRMZM2G145412	ID_1045	20	0	3.09	4.33	-0.43
GRMZM2G164405	ID_1047	20	0	1.2	1.32	-0.28
GRMZM2G449094	ID_1048	20	0	1.5	0.99	-0.02
GRMZM2G080887	ID_1049	20	0	1	2.24	-0.2
GRMZM2G082343	ID_1050	20	0	1.01	0.86	-0.1
GRMZM2G126749	ID_1051	20	0	1.1	1.51	-0.14
GRMZM2G103452	ID_1052	20	0	4.73	4.51	0.05
AC205982.3_FG014	ID_1053	20	0	6.11	5.06	0
GRMZM2G474229	ID_1055	20	0	1.9	1.9	0
GRMZM2G089698	ID_1134	20	0	4.5	7.35	-1.16
GRMZM2G101872	ID_1143	20	0	4.36	8.54	-1.19
GRMZM2G371839	ID_1193	20	0	4.18	3.99	1.13
GRMZM2G459828	ID_1201	20	0	2.52	1.31	0.03
GRMZM2G104616	ID_1216	20	0	1.44	1.38	-1.45
GRMZM2G173596	ID_1310	20	0	2.3	4.17	-1.67
GRMZM2G044864	ID_1345	20	0	1.38	0.75	0.3
GRMZM2G445634	ID_1367	20	0	35.63	65.71	-14.36
GRMZM2G478553	ID_1373	20	0	4.24	8.05	-2.17
GRMZM2G004301	ID_1406	20	0	4.43	4.56	2.16
GRMZM2G085460	ID_1411	20	0	3.32	4.93	0.01
GRMZM2G013200	ID_1417	20	0	1.31	1.04	-0.79
GRMZM2G013630	ID_1418	20	0	1.29	1	-0.72
GRMZM2G018820	ID_1429	20	0	167.51	128.89	-27.64
GRMZM2G152447	ID_1434	20	0	146.64	131.28	-0.88
GRMZM2G041127	ID_1436	20	0	11.5	21.8	-3.73
AC225718.2_FG006	ID_1439	20	0	55.5	96.43	-21.32
GRMZM5G847466	ID_1440	20	0	27.94	47.68	-17.96
GRMZM2G177631	ID_1442	20	0	18.41	19.09	2.09
GRMZM2G392125	ID_1443	20	0	60.76	84.15	-2.52
GRMZM2G145444	ID_1445	20	0	19.23	38.06	-4.02
GRMZM2G010987	ID_1446	20	0	8.18	7.12	-4.94
GRMZM2G139815	ID_1449	20	0	12.15	16.74	-9.58
GRMZM2G380432	ID_1451	20	0	16.25	19.14	-10.51
GRMZM5G866334	ID_1453	20	0	16.11	21.22	0.03
GRMZM2G031580	ID_1455	20	0	16.06	35.24	-3.73
GRMZM2G093962	ID_1457	20	0	33.81	54.78	-7.3
GRMZM2G047422	ID_1458	20	0	7.88	18.02	-8.58
GRMZM5G828488	ID_1459	20	0	28.06	19.74	-3.58
GRMZM2G149422	ID_1462	20	0	4.97	5.72	-2.04
GRMZM2G141320	ID_1465	20	0	29.96	30.47	0.05
GRMZM2G059397	ID_1469	20	0	8.46	14.6	-3.87
GRMZM2G174310	ID_1470	20	0	6.47	9.2	-4.8
GRMZM2G101245	ID_1471	20	0	11.48	22.13	-3.37
GRMZM2G057672	ID_1476	20	0	3.9	9.63	-3.36
AC194158.3_FG005	ID_1479	20	0	6.44	14.48	-3.47
GRMZM2G120539	ID_1487	20	0	2.77	6.12	-2.31
GRMZM2G399218	ID_1488	20	0	3.68	3.49	-0.99
GRMZM2G051619	ID_1489	20	0	9.51	10.14	1.15
GRMZM2G135586	ID_1491	20	0	4.78	3.83	0.08
GRMZM2G022514	ID_1492	20	0	2.65	5.27	-0.47
GRMZM2G096904	ID_1494	20	0	2.52	3.64	-0.03
GRMZM2G018336	ID_1496	20	0	1.68	2.03	-0.01
GRMZM2G320506	ID_1497	20	0	2.38	2.69	0.17
GRMZM2G115070	ID_1500	20	0	2.38	4.42	0
GRMZM2G120304	ID_1548	20	0	34.87	29.59	-23.61
GRMZM2G119782	ID_1551	20	0	20.32	27.83	-24.03
GRMZM2G062914	ID_1580	20	0	20.38	28.72	5.81
AC203424.3_FG001	ID_1620	20	0	9.64	14.14	0.95
GRMZM2G057258	ID_1627	20	0	9.63	11.29	1.22
GRMZM2G043584	ID_1650	20	0	7.86	8.21	2.4
GRMZM2G158562	ID_1651	20	0	6.78	4.71	2.45
GRMZM2G145133	ID_1657	20	0	7.18	4.49	2.82
GRMZM2G441347	ID_1666	20	0	3.39	5.38	-4.65
GRMZM2G162382	ID_1682	20	0	1.36	2.04	0.25
AC183932.3_FG007	ID_1691	20	0	6.09	8.21	1.73
GRMZM2G467370	ID_1697	20	0	10.59	6.11	1.95
GRMZM2G399921	ID_1698	20	0	1.59	1.15	-1.17
GRMZM2G054678	ID_1700	20	0	2.99	3.86	1.25
GRMZM2G106526	ID_1704	20	0	2.06	1.13	0.23
GRMZM2G048295	ID_1707	20	0	1.76	2.16	-0.77
GRMZM2G106945	ID_1710	20	0	5.1	5.2	0.62
GRMZM2G062541	ID_1726	20	0	2.05	2.79	0.2
GRMZM2G179777	ID_1728	20	0	4.81	5.26	2.23
GRMZM2G011110	ID_1760	20	0	1.82	1.41	-0.78
GRMZM2G424804	ID_1774	20	0	0.79	1.27	-0.1
GRMZM2G117007	ID_1781	20	0	36.31	81.91	-23.52
GRMZM2G175816	ID_1788	20	0	3.14	2.92	1.18
GRMZM2G149698	ID_1803	20	0	9.51	11.81	1.13
GRMZM2G085301	ID_1823	20	0	13.76	12.66	5.5
GRMZM5G849243	ID_1834	20	0	11.07	11.18	2.04
GRMZM2G087101	ID_1836	20	0	3.05	3.55	-0.33
GRMZM2G347043	ID_1839	20	0	20.44	40.21	-6.03
GRMZM2G455476	ID_1840	20	0	2.63	2.68	0.87
GRMZM2G381404	ID_1844	20	0	10.87	18.19	-4.83
GRMZM2G149024	ID_1850	20	0	8.55	14.26	-3.71
GRMZM2G037189	ID_1870	20	0	63.14	106.29	-19.3
GRMZM2G155525	ID_1872	20	0	2.05	2.96	-1.61
GRMZM2G042895	ID_1880	20	0	20.55	25.81	-2.17
GRMZM2G173965	ID_1885	20	0	8.79	18.29	-0.56
GRMZM2G131055	ID_1888	20	0	2.6	3.88	-0.14
GRMZM2G039988	ID_41	13	0	-26.09	-62.55	53.27
GRMZM2G118637	ID_51	13	0	-16.96	-17.44	25.68
GRMZM2G138220	ID_55	13	0	-6.82	1.62	25.99
GRMZM2G134256	ID_57	13	0	-2.33	-1.67	9.79
GRMZM2G003631	ID_64	13	0	-3.55	4.91	28.9
GRMZM2G118433	ID_69	13	0	-3.16	-8.99	7.39
GRMZM5G870077	ID_70	13	0	-1.44	3.9	45.38
GRMZM2G025783	ID_71	13	0	-0.32	9.27	46.46
GRMZM2G099944	ID_74	13	0	4.71	-0.98	20.32
GRMZM2G082185	ID_77	13	0	1.94	-1	20.8
AC215690.3_FG002	ID_90	13	0	5.23	-1.88	15.32
GRMZM2G179523	ID_94	13	0	-1.96	-3.01	5.56
AC209819.3_FG005	ID_106	13	0	-1.31	-3.51	4.23
GRMZM2G703490	ID_123	13	0	-1.4	0.98	8.94
GRMZM2G010491	ID_130	13	0	-2.12	-7.02	9.5
GRMZM2G171110	ID_140	13	0	-1.23	-1.48	2.02
GRMZM2G159002	ID_144	13	0	-1.72	-1.49	6.78
GRMZM2G475349	ID_145	13	0	-0.95	-1.63	11.24
GRMZM2G019183	ID_149	13	0	0.3	2.38	13.87
GRMZM2G043921	ID_165	13	0	-0.47	-0.2	10.8
GRMZM2G048335	ID_166	13	0	-2.33	-0.98	5.14
GRMZM2G457309	ID_167	13	0	-4.66	-2.6	17.12
GRMZM2G331368	ID_170	13	0	-0.41	0.42	3.9
GRMZM2G009958	ID_171	13	0	-2.97	-3.15	9.53
GRMZM2G046590	ID_173	13	0	-0.2	-1.51	1.65
GRMZM2G107239	ID_176	13	0	0.55	2.95	11.12
GRMZM2G327890	ID_179	13	0	-7.57	-8.26	19.56
GRMZM2G131087	ID_181	13	0	2.9	-0.33	27.27
GRMZM2G102845	ID_182	13	0	1.32	0.18	2.99
GRMZM2G071268	ID_192	13	0	1.84	0.24	5.17
GRMZM2G023557	ID_194	13	0	-5.81	-1.16	53.56
GRMZM2G114503	ID_195	13	0	-5.88	-5.41	11.69
GRMZM2G365162	ID_202	13	0	1.5	0.96	7.23
AC196278.2_FG003	ID_204	13	0	-1.7	-2.13	3.88
GRMZM2G076730	ID_209	13	0	-1.02	-1.48	3.34
GRMZM2G099960	ID_210	13	0	3.98	0.08	11.4
GRMZM2G379804	ID_218	13	0	0.38	0.39	2.5
GRMZM2G175425	ID_219	13	0	0.11	0.59	5.34
GRMZM2G355771	ID_222	13	0	-1.06	-0.32	3.65
GRMZM2G045849	ID_223	13	0	5.75	6.46	36.63
GRMZM2G145201	ID_225	13	0	-0.84	-0.46	2.78
GRMZM2G471186	ID_227	13	0	-1.35	-1.39	1.99
GRMZM2G099483	ID_230	13	0	1.34	-2.31	4.81
GRMZM2G103599	ID_242	13	0	0.24	-0.84	3.25
GRMZM2G348675	ID_243	13	0	0.32	0.85	3.58
GRMZM2G155077	ID_248	13	0	0.38	-1.44	2.3
GRMZM2G348125	ID_249	13	0	-2.23	-2.91	5.23
GRMZM2G352627	ID_257	13	0	-0.7	-2.2	2.32
GRMZM2G358827	ID_265	13	0	0.98	-0.25	2.45
GRMZM2G133057	ID_268	13	0	0.57	0.02	2.88
GRMZM2G402088	ID_274	13	0	-0.74	-0.37	1.52
GRMZM2G379964	ID_276	13	0	-0.35	-0.02	2.46
GRMZM2G000818	ID_280	13	0	0.13	-0.63	2.94
GRMZM2G053669	ID_286	13	0	0.32	0.09	1.3
GRMZM2G025459	ID_289	13	0	-0.56	-1.41	2
AC234165.1_FG002	ID_290	13	0	-1.19	-1.59	4.74
GRMZM2G172834	ID_291	13	0	-0.87	-1.12	8.65
GRMZM2G322493	ID_292	13	0	0.31	-0.52	2.28
GRMZM2G128923	ID_299	13	0	0.27	-0.27	3.87
GRMZM2G438938	ID_302	13	0	-0.26	-0.36	1.83
GRMZM2G410766	ID_305	13	0	-1.63	-1.91	2.94
GRMZM2G112057	ID_314	13	0	0.13	-0.75	1.01
GRMZM2G700192	ID_319	13	0	0.38	0.54	3.29
AC234521.1_FG004	ID_325	13	0	-1.38	-1.32	1.84
GRMZM2G366873	ID_327	13	0	0.57	-0.32	2.04
GRMZM2G316740	ID_332	13	0	-0.23	-0.57	1.24
GRMZM2G060541	ID_337	13	0	0.08	0.33	1.65
GRMZM2G024708	ID_338	13	0	0.39	-0.85	1.43
GRMZM2G145632	ID_340	13	0	-0.51	-0.2	5.76
GRMZM2G010731	ID_342	13	0	-0.83	-1	2.2
GRMZM2G179792	ID_343	13	0	0.02	-0.53	0.95
GRMZM2G316665	ID_344	13	0	-0.17	-0.46	0.67
GRMZM2G003679	ID_346	13	0	-0.94	-1	1.55
GRMZM2G122302	ID_347	13	0	0.2	-0.89	2.34
GRMZM2G333997	ID_349	13	0	0.74	0.29	3.34
AC205703.4_FG010	ID_350	13	0	0.24	-0.1	0.91
GRMZM2G156004	ID_351	13	0	-0.59	-0.93	1
GRMZM2G396541	ID_352	13	0	-0.09	-0.64	1.7
GRMZM2G093809	ID_354	13	0	-0.31	-0.67	0.89
AC177899.2_FG009	ID_355	13	0	-0.48	-0.68	0.79
GRMZM2G458728	ID_356	13	0	-0.17	-0.57	0.63
GRMZM2G418037	ID_360	13	0	0.95	0.71	3.42
GRMZM2G164036	ID_365	13	0	0.25	-0.15	1.41
GRMZM2G015976	ID_366	13	0	1.01	1.09	4.13
GRMZM2G300141	ID_370	13	0	0.56	-0.18	3.3
GRMZM2G420743	ID_373	13	0	0.38	0	1.49
GRMZM2G119517	ID_377	13	0	-0.08	-0.16	1.47
GRMZM2G112154	ID_380	13	0	-0.42	-0.46	0.7
GRMZM2G075925	ID_381	13	0	0.92	0.09	2.64
GRMZM2G116360	ID_386	13	0	0.17	-0.12	1.64
GRMZM2G019373	ID_387	13	0	-0.35	0.15	5.84
GRMZM2G075387	ID_388	13	0	0.13	0.39	1.36
GRMZM2G336337	ID_390	13	0	-0.28	-0.19	1.12
GRMZM2G082522	ID_392	13	0	0.26	0.3	1.08
GRMZM2G095404	ID_393	13	0	-0.2	-0.05	3.14
GRMZM2G110135	ID_394	13	0	-0.17	-0.09	1.68
GRMZM2G132169	ID_395	13	0	-0.14	-0.01	3.25
GRMZM2G006047	ID_396	13	0	-0.13	-0.01	2.74
GRMZM2G073764	ID_397	13	0	-0.13	0.05	2.51
GRMZM2G034360	ID_398	13	0	-0.12	0.05	1.68
GRMZM2G156924	ID_400	13	0	-0.11	0.53	2.36
GRMZM2G097851	ID_401	13	0	-0.01	0.1	3.57
GRMZM2G005991	ID_402	13	0	-0.11	-0.11	2.68
GRMZM2G046750	ID_403	13	0	-0.1	-0.1	2.69
GRMZM2G070178	ID_404	13	0	-0.06	0	1.35
GRMZM2G012148	ID_405	13	0	0	0	2.8
GRMZM2G120182	ID_407	13	0	0.09	0.1	1.17
GRMZM2G160354	ID_408	13	0	0	0.14	3.24
GRMZM2G335593	ID_409	13	0	0	0	10.42
GRMZM2G445616	ID_419	13	0	5.02	-0.75	21.48
GRMZM2G148831	ID_431	13	0	1.01	-2.2	8.43
GRMZM2G062396	ID_437	13	0	0.14	0.57	5.01
GRMZM2G031586	ID_459	13	0	26.98	-40.88	97.16
GRMZM2G369260	ID_467	13	0	-2.4	0.98	23.83
GRMZM2G116491	ID_679	13	0	0.03	0.12	1.91
GRMZM2G104610	ID_720	13	0	5.35	1.3	12.1
GRMZM2G130173	ID_858	13	0	-73.29	-255.45	238.89
GRMZM2G013773	ID_929	13	0	-0.98	-1.18	2.93
GRMZM2G331533	ID_942	13	0	-0.03	0.38	2.62
GRMZM2G432774	ID_943	13	0	1.14	0.35	4.07
AC199001.3_FG005	ID_951	13	0	-0.99	-0.3	2.41
GRMZM2G120079	ID_952	13	0	1.88	-3.17	15.11
GRMZM2G312110	ID_959	13	0	-0.24	0.86	3.96
GRMZM2G074572	ID_963	13	0	-0.6	-0.85	3.08
GRMZM2G398527	ID_965	13	0	-1.25	-1.46	2.37
GRMZM2G302913	ID_966	13	0	-0.56	0.05	2.52
GRMZM2G119657	ID_968	13	0	0.39	0.8	3
GRMZM2G092627	ID_980	13	0	-0.2	-0.63	1.29
GRMZM2G321420	ID_983	13	0	0.08	0.14	1.78
GRMZM2G095905	ID_984	13	0	-0.81	-0.94	1.33
GRMZM5G835794	ID_989	13	0	-0.96	-0.66	2.08
GRMZM2G060265	ID_994	13	0	0.54	-0.33	4.02
GRMZM2G074454	ID_1001	13	0	0.13	-0.13	1.11
GRMZM2G405052	ID_1005	13	0	0.05	-0.21	0.84
GRMZM2G117956	ID_1026	13	0	-1	-1.4	5.65
GRMZM2G003784	ID_1028	13	0	2.27	2.44	17.07
GRMZM2G050550	ID_1032	13	0	2.45	1.84	10.1
AC155610.2_FG009	ID_1059;ID_1378	13	0	-26.71	95.16	627.63
AC206201.3_FG004	ID_1073	13	0	51.62	6.04	108.86
GRMZM5G895282	ID_1102	13	0	-1.69	-0.97	4
GRMZM2G414866	ID_1200	13	0	-0.67	-0.91	2.25
GRMZM5G849284	ID_1239	13	0	0.36	0.33	1.56
GRMZM2G117680	ID_1244	13	0	0.36	-0.07	1.16
GRMZM2G312974	ID_1250	13	0	-0.19	-0.33	1.08
GRMZM2G109550	ID_1254	13	0	0.15	-0.52	1.69
GRMZM2G024612	ID_1255	13	0	-0.21	0.11	0.86
GRMZM2G360023	ID_1267	13	0	-0.39	0.09	2.26
GRMZM2G401769	ID_1293	13	0	0.1	0.17	1.05
GRMZM2G398024	ID_1311	13	0	0.15	-0.05	0.96
GRMZM2G401831	ID_1314	13	0	-0.09	-0.08	1.28
GRMZM2G400156	ID_1353	13	0	1.84	1.73	9.51
GRMZM2G110558	ID_1383	13	0	-5.12	-20.53	21.74
GRMZM2G171664	ID_1391	13	0	3.4	8.34	38.01
GRMZM2G017414	ID_1475	13	0	0.48	-1.14	3.04
GRMZM2G022054	ID_1634	13	0	2.87	-1.8	8.16
GRMZM2G301208	ID_1660	13	0	2.78	-1.4	7.49
GRMZM2G170927	ID_1662	13	0	1.53	-2.39	13.17
GRMZM2G171716	ID_1684	13	0	-1.9	-1.49	4.43
GRMZM2G062613	ID_1721	13	0	0.16	-0.65	1.94
GRMZM2G179521	ID_1730	13	0	0.38	-0.07	2.21
GRMZM2G151567	ID_1733	13	0	-0.15	0.57	2.74
AC210169.3_FG002	ID_1746	13	0	0.36	0.52	3.18
GRMZM2G351259	ID_1764	13	0	0.54	0.73	2.48
GRMZM2G429035	ID_1772	13	0	-0.05	0.23	1.23
GRMZM2G069444	ID_1786	13	0	-0.66	-0.79	3.04
GRMZM2G070912	ID_1791	13	0	-639.1	-1106.09	1172.67
GRMZM2G524978	ID_1800	13	0	0.26	-0.02	1.49
GRMZM2G082032	ID_1822	13	0	-8.97	-8.42	11.01
GRMZM2G007628	ID_1846	13	0	1.63	0.07	6.35
GRMZM2G135019	ID_1847	13	0	-0.21	-0.95	2.49
GRMZM5G800598	ID_1874	13	0	-0.34	3.63	17.03
GRMZM2G567452	ID_6	11	0	21.2	-149.44	5.94
GRMZM2G083935	ID_80	11	0	0.02	-12.42	6.52
GRMZM2G019404	ID_82	11	0	-2.2	-15.01	5.51
GRMZM2G315375	ID_91	11	0	4.42	-8.07	3.23
GRMZM2G147659	ID_93	11	0	-0.58	-17.91	1.15
GRMZM2G003835	ID_102	11	0	0.54	-4.71	-1.54
GRMZM2G176056	ID_103	11	0	5.25	-14.43	0.65
GRMZM2G089982	ID_119	11	0	5.4	-8.72	6.57
GRMZM2G170646	ID_121	11	0	3.35	-11.96	-0.19
AC210013.4_FG002	ID_146	11	0	-1.71	-6.32	-1.68
GRMZM2G177242	ID_148	11	0	4.21	-8.35	8.61
GRMZM2G357620	ID_151	11	0	2.42	-3.41	-0.73
GRMZM2G054120	ID_168	11	0	3.95	-5.13	3.45
GRMZM5G883759	ID_199	11	0	0.13	-3.75	1.3
GRMZM2G332522	ID_216	11	0	0.98	-4.06	2.29
GRMZM2G406119	ID_234	11	0	1.71	-2.47	1.06
GRMZM2G119783	ID_239	11	0	-1.6	-4.17	1.06
GRMZM2G033074	ID_240	11	0	2.05	-3.14	0.29
GRMZM2G060659	ID_247	11	0	-0.1	-2.01	1.18
GRMZM2G063566	ID_250	11	0	1.15	-2.94	3.59
GRMZM2G077535	ID_258	11	0	0.19	-2.18	-0.23
GRMZM2G344163	ID_259	11	0	1.36	-1.57	0.93
GRMZM2G100380	ID_264	11	0	-0.19	-2.66	-0.32
AC235540.1_FG002	ID_273	11	0	-0.11	-1.6	-0.32
GRMZM2G023715	ID_275	11	0	-0.47	-1.86	-0.39
GRMZM2G160862	ID_282	11	0	-0.29	-2.06	0.99
GRMZM2G172586	ID_283	11	0	0.44	-1.96	0.24
GRMZM2G470857	ID_287	11	0	-0.68	-1.7	-0.17
GRMZM2G055684	ID_309	11	0	0.26	-2.22	0.62
GRMZM2G058518	ID_310	11	0	-0.11	-1.21	0.01
GRMZM2G154449	ID_322	11	0	-0.27	-0.9	0.31
GRMZM2G439951	ID_330	11	0	0.37	-1.54	0.02
GRMZM2G024799	ID_331	11	0	-0.33	-1.35	0.07
GRMZM2G149315	ID_334	11	0	0.26	-1.2	1.01
GRMZM2G080503	ID_336	11	0	-0.44	-1.15	0.09
GRMZM2G047763	ID_339	11	0	-0.24	-0.75	0.33
GRMZM5G805526	ID_449	11	0	-74.38	-234.6	39.37
GRMZM2G059887	ID_454	11	0	64.31	-81.73	48.8
GRMZM2G094074	ID_456	11	0	-29.8	-79.27	-5.86
GRMZM2G137864	ID_457	11	0	89.98	-94.61	57.01
GRMZM2G322817	ID_533	11	0	-0.53	-12.44	-2.55
GRMZM2G315088	ID_560	11	0	-0.76	-4.16	0.04
GRMZM2G112609	ID_564	11	0	1.57	-2.62	1.53
GRMZM2G065557	ID_585	11	0	0.02	-5.61	-0.85
GRMZM2G520811	ID_596	11	0	-2.27	-5.34	-0.45
GRMZM2G046286	ID_641	11	0	-0.52	-2.48	1.09
GRMZM2G137566	ID_736	11	0	-0.04	-1.05	0.24
GRMZM2G401883	ID_885	11	0	4.01	-29.77	-2.64
GRMZM2G017186	ID_889	11	0	-0.89	-26.04	-6.69
GRMZM2G066191	ID_895	11	0	3.95	-26.52	-8.59
GRMZM2G005552	ID_914	11	0	6.91	-9.6	0.45
GRMZM2G339866	ID_915	11	0	3.87	-12.6	-4.21
GRMZM2G414159	ID_919	11	0	0.5	-6.92	-2.16
GRMZM2G180150	ID_925	11	0	-1.68	-5.13	1.92
GRMZM2G175952	ID_927	11	0	3.19	-8.85	-0.9
GRMZM2G146130	ID_930	11	0	2.64	-5.77	-1.46
GRMZM2G012176	ID_938	11	0	2.5	-4.04	0.07
GRMZM2G108023	ID_941	11	0	-1.38	-6.38	-0.5
AC197672.3_FG002	ID_944	11	0	-0.28	-2.16	1.11
GRMZM2G434557	ID_947	11	0	-0.35	-7.47	0.78
GRMZM2G137352	ID_950	11	0	-1.5	-6.3	3.7
GRMZM2G058472	ID_954	11	0	-1.02	-4.72	1.79
GRMZM2G404676	ID_955	11	0	3.68	-3.57	0.16
GRMZM2G126763	ID_958	11	0	1.26	-5.02	1.31
GRMZM2G373849	ID_961	11	0	-0.02	-3.4	-0.08
GRMZM2G125241	ID_971	11	0	0.04	-4.09	-1.54
GRMZM2G018241	ID_976	11	0	-0.38	-1.17	0.53
GRMZM2G379913	ID_978	11	0	0.13	-1.25	0.96
GRMZM2G171781	ID_995	11	0	-0.22	-1.97	0.28
GRMZM2G123122	ID_999	11	0	0.64	-1.21	0.06
GRMZM2G162388	ID_1011	11	0	0.4	-34.9	-12.2
GRMZM2G092968	ID_1014	11	0	14.22	-15.34	0.61
GRMZM2G493903	ID_1060	11	0	-72.46	-286.24	-14.56
GRMZM2G076468	ID_1136	11	0	1.17	-14.09	-5.77
GRMZM2G006894	ID_1138	11	0	5.58	-7.41	0.54
GRMZM2G379929	ID_1157	11	0	0.7	-3.7	-0.75
GRMZM2G044055	ID_1168	11	0	1.91	-2.07	0.09
GRMZM2G046601	ID_1190	11	0	1.28	-5.64	-0.22
GRMZM2G049790	ID_1199	11	0	0.65	-1	0.54
GRMZM2G413113	ID_1227	11	0	0.93	-3.57	-1.29
GRMZM2G051782	ID_1249	11	0	1.11	-1.76	1.15
GRMZM2G370193	ID_1260	11	0	1.71	-2.31	-0.29
GRMZM2G177771	ID_1269	11	0	-0.23	-0.84	0.18
GRMZM2G084806	ID_1276	11	0	1.08	-1.67	0.59
GRMZM2G353076	ID_1324	11	0	0.82	-1.02	0.5
GRMZM2G356938	ID_1393	11	0	3.57	-5.47	1.5
GRMZM2G064437	ID_1405	11	0	-2.33	-6.05	1.35
GRMZM2G132929	ID_1428	11	0	-4.43	-20.25	1.45
GRMZM2G329353	ID_1466	11	0	0.71	-2.48	2.4
GRMZM2G365983	ID_1531	11	0	-0.13	-0.94	0.14
GRMZM2G384070	ID_1604	11	0	-0.22	-3.88	-0.66
GRMZM2G045318	ID_1636	11	0	1.49	-2.84	-0.18
GRMZM2G396114	ID_1676	11	0	0.9	-2.27	0.88
GRMZM2G012756	ID_1755	11	0	0.33	-0.68	0.11
GRMZM2G424205	ID_1809	11	0	0.15	-1.55	0.83
GRMZM2G150004	ID_1830	11	0	1.46	-1.23	0.32
GRMZM2G066469	ID_1873	11	0	-0.55	-5.78	-1.28
GRMZM2G404973	ID_76	14	0	3.58	21.7	-4.2
GRMZM2G427054	ID_125	14	0	0.28	5.4	-1.05
GRMZM2G589134	ID_139	14	0	0.53	2.58	-0.36
GRMZM2G107686	ID_200	14	0	-0.53	1.36	-0.5
GRMZM2G109332	ID_229	14	0	0.21	4.68	1.24
GRMZM2G113779	ID_261	14	0	-0.33	5.36	0.15
GRMZM2G355572	ID_417	14	0	30.99	144.53	-62.74
GRMZM2G096016	ID_441	14	0	0.2	1.59	0.6
AC233788.2_FG002	ID_447	14	0	1537.96	9909.58	-460.21
GRMZM2G324248	ID_458	14	0	25.13	138.13	-69.76
GRMZM2G020940	ID_481	14	0	59.81	227.5	-11.97
GRMZM2G076348	ID_482	14	0	2.89	21.24	-15.41
GRMZM2G386674	ID_484	14	0	2.57	56.88	-20.71
GRMZM5G853245	ID_495	14	0	13.78	47.62	-14.01
GRMZM2G405090	ID_505	14	0	10.88	32.6	-11.67
GRMZM2G069018	ID_509	14	0	7.27	27.75	-9.38
GRMZM2G310548	ID_513	14	0	7.68	40.89	-4.98
GRMZM5G822237	ID_515	14	0	5.64	34.2	-13.59
GRMZM2G069082	ID_517	14	0	1.06	26.75	-24.14
GRMZM5G878379	ID_518	14	0	9.2	35.35	-12.62
GRMZM2G055204	ID_519	14	0	4.79	17.91	-9.15
GRMZM2G308595	ID_522	14	0	1.46	25.79	-18.21
GRMZM2G123394	ID_542	14	0	4.62	32.38	-11.36
GRMZM2G413337	ID_547	14	0	9.41	27.41	-11.57
GRMZM2G438202	ID_550	14	0	11.23	39.26	-14.42
AC213521.3_FG005	ID_556	14	0	9.81	26.96	-9.9
GRMZM2G151496	ID_559	14	0	5.09	17.11	-4.17
GRMZM2G374629	ID_565	14	0	3.39	14.49	-6.35
GRMZM2G323888	ID_569	14	0	3.62	11.13	-4.87
GRMZM2G082544	ID_576	14	0	3.34	10.35	-2.91
GRMZM2G131280	ID_577	14	0	2.11	7.12	-0.83
GRMZM2G393349	ID_578	14	0	6.02	18.19	-0.57
GRMZM2G006745	ID_579	14	0	2.97	13.79	0.65
GRMZM2G134878	ID_588	14	0	-2.13	11.21	-3.61
GRMZM2G061408	ID_590	14	0	14.88	36.05	-6.16
GRMZM2G025895	ID_591	14	0	14.53	35.26	-6.15
GRMZM2G401436	ID_592	14	0	12.56	38.32	-4.62
GRMZM2G004422	ID_593	14	0	1.95	6.18	-3.34
GRMZM2G050080	ID_595	14	0	-0.75	11.9	-3.12
GRMZM2G479529	ID_597	14	0	7.72	17.67	-1.62
GRMZM2G397684	ID_601	14	0	-0.52	14.74	-6.46
GRMZM2G462760	ID_602	14	0	2.77	17	-3.25
GRMZM2G151649	ID_606	14	0	0.99	8.16	-4.07
GRMZM5G821439	ID_607	14	0	5.49	12.43	0.27
GRMZM2G409128	ID_610	14	0	3.51	9.15	-0.23
GRMZM2G159937	ID_614	14	0	5.49	16.35	-2.89
GRMZM2G112629	ID_615	14	0	6.65	18.31	-2.32
GRMZM2G147346	ID_619	14	0	-0.55	12.03	-3.52
GRMZM2G090594	ID_621	14	0	4.06	10.3	-0.01
GRMZM2G153683	ID_622	14	0	5.08	14.45	-0.61
GRMZM2G377904	ID_624	14	0	3.7	10.79	-1.66
GRMZM2G010555	ID_627	14	0	6.69	21.08	-2.93
GRMZM2G040803	ID_630	14	0	1	5.65	-1.22
GRMZM2G432060	ID_632	14	0	5.5	17.33	-4.8
GRMZM2G311898	ID_634	14	0	7.09	22.71	-5.05
GRMZM2G014022	ID_635	14	0	3.47	25.34	-4.85
GRMZM2G304474	ID_640	14	0	0.62	6.83	-4.06
GRMZM5G808017	ID_645	14	0	-1.11	3.42	-1.93
GRMZM2G146614	ID_649	14	0	2.94	12.74	-4.77
GRMZM2G134711	ID_651	14	0	0.52	12.58	-1.32
GRMZM2G115162	ID_662	14	0	1.24	4.86	1.05
GRMZM2G086163	ID_665	14	0	2.73	11.91	-2.18
GRMZM2G406024	ID_667	14	0	4.05	11.85	-2.33
GRMZM2G404603	ID_677	14	0	5.79	18.26	-3.88
GRMZM2G130764	ID_678	14	0	1.12	3.88	-1.2
GRMZM2G009009	ID_687	14	0	1.71	7	-2
GRMZM2G066213	ID_688	14	0	1.13	5.62	-2.02
GRMZM2G093101	ID_689	14	0	1.28	5.41	-0.3
GRMZM2G010855	ID_696	14	0	7.34	16.03	-0.01
GRMZM2G180080	ID_700	14	0	0.53	2.27	-0.57
GRMZM2G132212	ID_703	14	0	0.98	4.18	-1.55
GRMZM2G082034	ID_706	14	0	0.41	3.69	0.48
GRMZM2G124037	ID_707	14	0	0.52	5.96	-2.85
GRMZM2G026151	ID_710	14	0	2.72	8.4	-0.84
GRMZM5G868355	ID_711	14	0	0.23	3.77	-1.05
GRMZM2G134450	ID_712	14	0	1.36	3.95	-0.85
GRMZM2G098517	ID_713	14	0	1.06	4.15	-1.22
GRMZM2G476477	ID_716	14	0	2.73	7.7	-1.87
GRMZM2G343157	ID_718	14	0	2.46	6.72	-2.13
GRMZM2G133189	ID_721	14	0	0.7	2.91	-1.62
GRMZM5G879872	ID_725	14	0	-0.15	1.94	-1.67
GRMZM2G375159	ID_731	14	0	3.11	7.34	-0.47
GRMZM2G110220	ID_732	14	0	0.74	2.95	-1.26
GRMZM2G300924	ID_748	14	0	0.25	2.15	-1.29
GRMZM2G378442	ID_751	14	0	1.18	2.65	0.01
GRMZM2G144158	ID_756	14	0	-0.15	1.54	-0.86
GRMZM2G340578	ID_759	14	0	1.19	4.7	-1.16
GRMZM2G073324	ID_763	14	0	0.47	8	-0.79
GRMZM2G367094	ID_765	14	0	2.38	9.45	-1.1
GRMZM2G037422	ID_766	14	0	0	1.46	-0.06
GRMZM2G318180	ID_772	14	0	2.08	5.84	-0.84
GRMZM2G139675	ID_773	14	0	-0.12	20.15	0.02
GRMZM2G317426	ID_775	14	0	1.26	5.67	-0.98
GRMZM2G180775	ID_776	14	0	1.15	3.11	-0.7
GRMZM2G075245	ID_777	14	0	1.02	3.13	-0.66
GRMZM2G091857	ID_778	14	0	-0.19	1.55	-0.5
GRMZM2G380377	ID_779	14	0	1.43	3.96	-0.87
GRMZM2G125653	ID_782	14	0	1.22	3.83	0.19
GRMZM2G054048	ID_783	14	0	-0.29	1.52	-0.17
GRMZM2G116238	ID_784	14	0	-0.27	0.79	-0.78
GRMZM5G897005	ID_787	14	0	0.7	1.57	0.15
GRMZM2G172734	ID_791	14	0	-0.29	0.82	-0.39
GRMZM2G098637	ID_793	14	0	1.18	3.06	-0.37
GRMZM2G176182	ID_794	14	0	0.16	1.42	-0.54
GRMZM2G026184	ID_797	14	0	-0.07	8.63	2.23
GRMZM5G883250	ID_798	14	0	1.32	3.07	-0.31
GRMZM2G074248	ID_803	14	0	0.13	2.36	-0.34
GRMZM2G138396	ID_806	14	0	-0.41	1.1	-0.5
GRMZM2G090328	ID_808	14	0	0.75	2.52	-0.33
GRMZM2G132958	ID_809	14	0	0.5	3.68	-0.23
GRMZM2G165099	ID_812	14	0	0.37	3.17	-0.24
GRMZM2G041344	ID_820	14	0	0.5	1.37	-0.27
GRMZM2G064558	ID_824	14	0	-0.02	7.26	-0.01
GRMZM2G305066	ID_827	14	0	0.67	2.66	0.12
GRMZM2G034430	ID_830	14	0	-0.1	1.96	-0.1
AC187263.4_FG001	ID_832	14	0	0	2.69	0
AC204050.4_FG006	ID_833	14	0	0.24	1.85	0
AC216229.3_FG002	ID_834	14	0	0	1.58	0
GRMZM2G033199	ID_836	14	0	0.12	5.79	0.14
GRMZM2G055054	ID_837	14	0	0	1.94	0
GRMZM2G064311	ID_838	14	0	0	2.69	0
GRMZM2G092758	ID_839	14	0	0.95	11.15	2.08
GRMZM2G093038	ID_840	14	0	0	2.55	0
GRMZM2G104622	ID_841	14	0	0.31	2.36	0
GRMZM2G122057	ID_842	14	0	0	1.79	0
GRMZM2G126106	ID_843	14	0	0	2.2	0
GRMZM2G157990	ID_846	14	0	0.43	1.17	0
GRMZM2G163796	ID_847	14	0	0	3.88	0
GRMZM2G170586	ID_848	14	0	0.08	6.42	0
GRMZM2G312736	ID_849	14	0	0.1	1.48	0.11
GRMZM2G368591	ID_850	14	0	0	2.43	0
GRMZM2G423669	ID_851	14	0	0	2.25	0
GRMZM2G444819	ID_852	14	0	1.46	6.04	0.12
GRMZM2G447806	ID_853	14	0	0	2.98	0
GRMZM5G855401	ID_855	14	0	0	2.46	0
GRMZM2G400718	ID_884	14	0	-4.5	15.39	-1.16
GRMZM2G106413	ID_960	14	0	2.12	12.48	-3.81
GRMZM2G162535	ID_979	14	0	-0.22	2.99	-0.5
GRMZM2G106445	ID_990	14	0	0.43	4.15	1.15
GRMZM2G109388	ID_1000	14	0	0.9	2.81	0.08
GRMZM2G426046	ID_1033	14	0	2.08	8.27	-3.3
GRMZM2G024705	ID_1054	14	0	0.84	5.76	0
GRMZM2G112210	ID_1064	14	0	-9.47	43.4	15.13
GRMZM5G851266	ID_1075	14	0	-43.33	75.7	4.89
GRMZM2G169890	ID_1079	14	0	-31.82	36.12	-19.42
GRMZM5G822449	ID_1112	14	0	1.18	27.86	4.86
GRMZM2G004012	ID_1121	14	0	-6.03	16.16	4.2
GRMZM5G868730	ID_1147	14	0	0.58	12.05	1.72
GRMZM5G819523	ID_1167	14	0	-0.99	6.35	1.91
GRMZM2G146688	ID_1169	14	0	-0.15	3.68	1.64
GRMZM2G016958	ID_1179	14	0	-0.08	1.12	-1.06
GRMZM2G114008	ID_1226	14	0	0.46	7.43	2.66
GRMZM2G339545	ID_1233	14	0	2.41	5.6	0.65
GRMZM2G155490	ID_1301	14	0	0.34	1.85	0.5
GRMZM2G471304	ID_1319	14	0	-0.81	0.74	-0.08
GRMZM2G442129	ID_1343	14	0	0.02	1.02	0.1
GRMZM2G104876	ID_1430	14	0	37.3	97.2	3.26
GRMZM2G162127	ID_1432	14	0	-2.24	18.9	-3.67
GRMZM2G081949	ID_1433	14	0	38.36	101.68	-28.69
GRMZM2G379428	ID_1438	14	0	-3.54	15.92	-16.54
GRMZM2G060544	ID_1447	14	0	1.32	12.58	-6.92
GRMZM2G080567	ID_1450	14	0	8.6	53.36	-10.01
GRMZM2G044498	ID_1452	14	0	3.53	20.09	-2.75
GRMZM2G097900	ID_1454	14	0	19.95	56.24	-0.63
AC206951.3_FG017	ID_1456	14	0	5.81	33.32	-7.87
GRMZM2G420883	ID_1460	14	0	4.12	19.39	-2.61
GRMZM2G177050	ID_1461	14	0	9.64	27.93	-6.17
GRMZM2G164591	ID_1464	14	0	7.26	26.69	-4.42
GRMZM2G044537	ID_1480	14	0	4.66	22.13	-3.18
GRMZM2G159477	ID_1481	14	0	2.19	8.68	-0.87
GRMZM2G068967	ID_1482	14	0	4.75	19.89	-2.46
GRMZM2G153523	ID_1485	14	0	4.21	11.17	-2.26
GRMZM2G177356	ID_1495	14	0	3.63	9.21	-0.6
GRMZM2G401026	ID_1498	14	0	3.79	8.79	0.93
GRMZM2G143627	ID_1562	14	0	-5.23	13.69	2.64
GRMZM2G408458	ID_1597	14	0	0.24	22.89	8.89
GRMZM2G096165	ID_1601	14	0	1.85	10.93	1.6
GRMZM2G008657	ID_1602	14	0	4.08	19.87	4.93
GRMZM2G067522	ID_1613	14	0	-6.7	18.12	6.15
GRMZM2G016477	ID_1640	14	0	-0.13	6.66	1.92
GRMZM5G873635	ID_1653	14	0	0.67	3.17	0.07
GRMZM2G129166	ID_1675	14	0	-0.36	1.89	-0.75
GRMZM2G139512	ID_1716	14	0	0.56	5.63	-1.53
GRMZM2G032602	ID_1766	14	0	0.63	1.37	0.05
GRMZM5G894619	ID_1769	14	0	1.05	4.74	-0.37
GRMZM2G037015	ID_1779	14	0	38.41	127.27	-44.7
GRMZM2G089995	ID_1780	14	0	2.12	44.57	-30.1
GRMZM2G357631	ID_1782	14	0	47.34	116	-21.43
GRMZM2G020054	ID_1783	14	0	16.42	89.21	-20.93
GRMZM2G079499	ID_1814	14	0	0.38	3.17	0.92
GRMZM2G374074	ID_1832	14	0	22.6	68.5	-12.46
GRMZM2G036351	ID_1843	14	0	15.92	39.07	-5.22
GRMZM2G137596	ID_1860	14	0	0.21	2.36	-0.01
GRMZM2G134334	ID_1869	14	0	48.35	137.24	-29.16
GRMZM2G049185	ID_1871	14	0	15.36	49.14	-14.64
GRMZM2G449681	ID_1875	14	0	10.12	26.19	-5.02
AC210168.4_FG003	ID_1876	14	0	29.35	85.88	9.26
GRMZM2G172485	ID_1877	14	0	6.07	15.28	-3.34
GRMZM2G369472	ID_1881	14	0	8.31	19.33	-2.22
GRMZM2G301089	ID_1882	14	0	16.27	38.09	-1.65
GRMZM2G041774	ID_1886	14	0	8.61	21.37	-0.62
GRMZM2G343317	ID_1887	14	0	1.13	9.55	0.08
GRMZM2G142097	ID_2	2	0	-319.33	-515.77	-389.29
GRMZM5G863656	ID_4	2	0	-101.52	-129.47	-71.18
GRMZM2G044882	ID_30	2	0	-26.73	-32.69	-13.58
GRMZM2G010196	ID_33	2	0	-34.4	-49.89	-34.55
GRMZM2G090718	ID_35	2	0	-35.08	-57.48	-16.31
GRMZM2G556667	ID_45	2	0	-16.08	-21.3	-8.41
GRMZM2G064967	ID_79	2	0	-10.6	-12.36	-7.21
GRMZM2G135536	ID_87	2	0	-8.26	-9.65	-5.3
GRMZM2G131120	ID_111	2	0	-7.03	-11.33	-3.52
GRMZM2G156296	ID_112	2	0	-11.35	-15.96	-9.45
GRMZM2G108537	ID_116	2	0	-3.41	-9.16	-2.92
GRMZM2G513713	ID_152	2	0	-3.08	-6.51	-3.43
GRMZM2G017223	ID_161	2	0	-5.68	-8.15	-5.46
GRMZM2G043300	ID_183	2	0	-4.77	-7.17	-4.11
GRMZM2G173718	ID_184	2	0	-4.07	-6.93	-1.6
GRMZM2G123489	ID_188	2	0	-1.91	-4.63	-2.41
GRMZM2G013206	ID_196	2	0	-2.26	-5.38	-1.73
AC226235.2_FG001	ID_207	2	0	-2.43	-4.42	-1.18
GRMZM2G339728	ID_324	2	0	-0.34	-1.25	-0.37
GRMZM2G170826	ID_427	2	0	-3.14	-6.11	-3.71
GRMZM2G089421	ID_448	2	0	-262.04	-292.57	-141.1
GRMZM2G091383	ID_453	2	0	-106.34	-174.67	-105.47
GRMZM2G119169	ID_463	2	0	-34.32	-59.07	-15.59
GRMZM2G011253	ID_466	2	0	-28.36	-43.05	-28.49
GRMZM2G105712	ID_472	2	0	-27.75	-45.98	-15.83
GRMZM2G178497	ID_492	2	0	-5.76	-12.52	-4.64
GRMZM2G389173	ID_526	2	0	-6.42	-10.31	-6.08
GRMZM2G344279	ID_546	2	0	-7.45	-12.55	-6.15
GRMZM2G069672	ID_652	2	0	-1.99	-2.72	-1.76
AC215201.3_FG005	ID_880	2	0	-25.74	-43.35	-28.34
GRMZM2G133698	ID_903	2	0	-10.85	-19.76	-5.61
GRMZM2G136236	ID_910	2	0	-3.29	-9.57	-3.54
AC234203.1_FG004	ID_921	2	0	-1.81	-6.05	-3.84
GRMZM2G480850	ID_939	2	0	-2.14	-8.96	-5.25
AC186164.3_FG001	ID_1150	2	0	-2.95	-7.28	-2.27
AC233922.1_FG008	ID_1186	2	0	-5.22	-7.29	-5.25
GRMZM2G010960	ID_1203	2	0	-0.49	-1.92	-0.78
GRMZM2G020799	ID_1212	2	0	-0.95	-4.56	-2.37
GRMZM2G137673	ID_1217	2	0	-1.13	-2.96	-1.34
GRMZM2G108615	ID_1247	2	0	-0.44	-2.23	-1.3
GRMZM2G150656	ID_1382	2	0	-48.52	-84.05	-38.94
GRMZM2G054896	ID_1386	2	0	-9.06	-23.15	-4.92
GRMZM2G053939	ID_1395	2	0	-27.02	-39.58	-12.76
GRMZM2G076593	ID_1412	2	0	-0.95	-2.95	-0.85
GRMZM2G302712	ID_1422	2	0	-260.21	-352.65	-224.88
GRMZM2G114793	ID_1425	2	0	-25.95	-50.7	-19.04
GRMZM2G074687	ID_1441	2	0	-12.91	-20.02	-13.27
GRMZM2G100467	ID_1539	2	0	-166.09	-262.41	-169.33
GRMZM2G067476	ID_1552	2	0	-47.4	-82.95	-39.93
GRMZM2G008252	ID_1557	2	0	-39.95	-54	-21.87
GRMZM2G003179	ID_1560	2	0	-25.09	-81.11	-43.36
GRMZM2G430685	ID_1566	2	0	-37.2	-47.5	-24.84
GRMZM2G077530	ID_1585	2	0	-10.8	-19.75	-14.48
GRMZM2G150098	ID_1593	2	0	-8	-13.23	-6.96
GRMZM2G030809	ID_1603	2	0	-8.12	-11.81	-7.65
GRMZM2G050126	ID_1614	2	0	-3.22	-10.8	-3.33
GRMZM2G404025	ID_1616	2	0	-9.79	-14.28	-8.28
GRMZM2G057237	ID_1623	2	0	-5.52	-7.77	-5.66
GRMZM2G015596	ID_1629	2	0	-1.11	-1.86	-0.59
GRMZM2G590771	ID_1631	2	0	-5.99	-9.57	-6.93
GRMZM5G873015	ID_1637	2	0	-0.42	-2.89	-1.32
GRMZM2G150011	ID_1645	2	0	-3.32	-5.5	-3.86
GRMZM2G123790	ID_1649	2	0	-3.86	-6.82	-4.8
GRMZM5G894932	ID_1670	2	0	-1.35	-3.55	-1.91
GRMZM2G087552	ID_1671	2	0	-5.51	-8.99	-5
GRMZM2G097129	ID_1690	2	0	-1.12	-3	-1.46
GRMZM2G141473	ID_1745	2	0	-0.67	-1.24	-0.66
GRMZM2G121843	ID_1821	2	0	-7.51	-11	-4.35
GRMZM2G016817	ID_50	25	0	18.1	52.74	77.63
GRMZM2G023636	ID_191	25	0	0.65	1.1	2.32
GRMZM2G367023	ID_345	25	0	0.55	0.79	1.21
GRMZM2G539790	ID_792	25	0	0.66	1.24	2.08
GRMZM2G026223	ID_1133	25	0	12.61	34.77	50.13
GRMZM2G165069	ID_1174	25	0	6.06	13.89	23.78
GRMZM2G353885	ID_1185	25	0	1.26	3.11	5.12
GRMZM2G119339	ID_1281	25	0	0.51	1.57	1.83
GRMZM5G827174	ID_1315	25	0	0.99	1.94	2.75
GRMZM2G114954	ID_1572	25	0	3.77	5.99	12.51
GRMZM2G098084	ID_1639	25	0	2.95	8.6	14.05
GRMZM2G146015	ID_42	24	0	16.34	47.25	51.1
GRMZM2G320269	ID_279	24	0	0.89	1.62	1.54
GRMZM2G420571	ID_962	24	0	2.25	3.84	3.25
GRMZM2G101682	ID_1039	24	0	2.39	7.28	7.75
GRMZM2G039919	ID_1090	24	0	14.48	37.8	28.47
GRMZM2G113863	ID_1104	24	0	2.34	9.15	6.76
GRMZM2G431504	ID_1229	24	0	2.9	5.41	5.84
GRMZM2G047677	ID_1328	24	0	0.71	1.09	1.25
GRMZM5G876616	ID_1398	24	0	7.7	23.8	19.86
GRMZM2G124566	ID_1523	24	0	5.01	10.34	9.79
GRMZM2G108474	ID_1542	24	0	80.57	223.79	159.02
GRMZM2G034013	ID_1612	24	0	6.36	17.22	14.35
GRMZM2G129083	ID_1615	24	0	19.43	37.33	34.8
GRMZM2G143499	ID_1646	24	0	2.54	9.21	9.17
GRMZM2G392918	ID_1665	24	0	3.48	8.89	7.9
GRMZM2G702113	ID_1669	24	0	5.75	8.73	8.02
GRMZM2G156904	ID_1694	24	0	3.1	6.76	5.68
AC234520.1_FG003	ID_1709	24	0	3.59	10.4	7.21
GRMZM2G163304	ID_1744	24	0	2.99	4.66	5.55
GRMZM2G082487	ID_1770	24	0	0.5	1.26	0.98
AC220927.3_FG007	ID_1794	24	0	45.01	72.16	59.73
GRMZM2G070255	ID_1801	24	0	13.23	44.03	40.22
GRMZM2G180422	ID_1824	24	0	2.94	4.02	3.96
GRMZM2G026050	ID_1848	24	0	1.44	3.32	3.58
GRMZM2G022253	ID_32	23	0	54.91	94.06	20.85
GRMZM2G033570	ID_53	23	0	8.92	13.48	7.49
GRMZM2G172448	ID_81	23	0	13.39	26.98	6.9
GRMZM2G138008	ID_376	23	0	1.13	1.77	1.25
GRMZM2G140915	ID_438	23	0	0.76	1.2	0.3
GRMZM2G003682	ID_558	23	0	12.93	25.92	3.93
GRMZM2G006977	ID_584	23	0	3.91	8.27	0.98
GRMZM2G417859	ID_594	23	0	2.14	3.64	1.67
GRMZM2G074017	ID_623	23	0	7.14	11.19	3.97
GRMZM2G031280	ID_638	23	0	3.4	11.33	3.78
GRMZM2G476523	ID_871	23	0	42.58	64.84	43.33
GRMZM2G171365	ID_997	23	0	2.47	6.38	2.11
GRMZM2G172204	ID_1067	23	0	38.31	119	37.01
GRMZM2G002147	ID_1099	23	0	11.59	39.16	16.3
GRMZM2G005715	ID_1113	23	0	7.28	26.49	10.68
GRMZM2G158526	ID_1130	23	0	4.89	20.68	8.71
GRMZM5G803308	ID_1141	23	0	2.47	9.11	5.36
GRMZM5G813403	ID_1144	23	0	6.43	17.84	11.39
GRMZM2G429128	ID_1152	23	0	5.12	6.46	3.21
GRMZM5G852779	ID_1162	23	0	5.07	9.71	1.55
GRMZM2G031572	ID_1163	23	0	2.56	5.22	1.56
GRMZM2G082580	ID_1232	23	0	3.35	5.08	2.56
GRMZM2G343974	ID_1242	23	0	1.46	1.98	1.23
GRMZM2G163761	ID_1264	23	0	0.52	3.5	1.43
GRMZM2G024466	ID_1292	23	0	0.51	1.19	0.75
GRMZM2G122231	ID_1365	23	0	11.32	16.97	10.71
GRMZM2G325247	ID_1448	23	0	7.78	16.68	1.92
GRMZM2G153754	ID_1520	23	0	1.48	5.6	2.05
GRMZM2G178432	ID_1526	23	0	2.09	7.85	2.74
GRMZM5G898755	ID_1555	23	0	75.63	177.22	77.3
GRMZM2G329144	ID_1586	23	0	15	31.33	11.72
GRMZM2G042008	ID_1611	23	0	13.17	35.01	12.41
GRMZM2G167986	ID_1635	23	0	7.33	10.8	3.24
GRMZM2G054603	ID_1642	23	0	3.3	8.36	1.87
GRMZM5G891295	ID_1652	23	0	7.71	12	4.06
AC204712.3_FG002	ID_1664	23	0	5.17	10.02	3.23
GRMZM2G094867	ID_1667	23	0	6.01	9.71	5.36
GRMZM2G171170	ID_1672	23	0	6.35	17.97	5.28
GRMZM2G078279	ID_1693	23	0	1.42	7.85	3.68
GRMZM2G145101	ID_1722	23	0	2.69	5.15	2.35
GRMZM2G381739	ID_1723	23	0	3.8	5.57	3.48
GRMZM5G862956	ID_1725	23	0	4.75	8.01	3.25
GRMZM2G323470	ID_1731	23	0	1.85	3.08	1.8
GRMZM2G156377	ID_1756	23	0	1.83	4.3	1.21
GRMZM2G437575	ID_1776	23	0	3.39	19.87	7.8
GRMZM2G148561	ID_1812	23	0	2.49	15.81	7.04
GRMZM2G054378	ID_1829	23	0	2.38	4.69	2.24
GRMZM2G088539	ID_1831	23	0	7.36	10.46	3.28
GRMZM2G126190	ID_21	22	0	51.17	33.55	94.09
GRMZM2G078876	ID_25	22	0	28.08	14.74	51.06
GRMZM2G034385	ID_105	22	0	8.89	10.8	18.11
GRMZM2G344967	ID_190	22	0	1.64	1.91	4.59
GRMZM2G121649	ID_235	22	0	1.41	1.27	4.04
GRMZM2G084819	ID_288	22	0	0.99	0.73	1.68
GRMZM2G173669	ID_298	22	0	1.84	1.65	4.42
GRMZM2G477837	ID_410	22	0	2.16	2.69	4.89
GRMZM2G374971	ID_436	22	0	2.64	2.01	4.71
GRMZM2G347322	ID_988	22	0	1.69	0.84	3.03
GRMZM2G119766	ID_1094	22	0	19.33	13.72	48.71
GRMZM2G431412	ID_1146	22	0	10.02	5.68	16.7
GRMZM2G053503	ID_1153	22	0	3.41	4.31	9.5
GRMZM5G874896	ID_1155	22	0	2.18	1.05	3.48
GRMZM2G109787	ID_1234	22	0	4.2	3.07	6.58
GRMZM2G440943	ID_1245	22	0	0.68	0.34	1.44
GRMZM2G070126	ID_1284	22	0	0.44	0.61	1.26
GRMZM2G153575	ID_1298	22	0	1.09	0.63	1.19
GRMZM2G329944	ID_1333	22	0	0.68	0.57	1.19
GRMZM2G084264	ID_1352	22	0	1.03	1.21	2.93
GRMZM2G034015	ID_1507	22	0	12.35	8.43	23.39
GRMZM2G466984	ID_1521	22	0	4.27	4.14	11.21
GRMZM2G417682	ID_1528	22	0	0.67	0.37	1.58
GRMZM5G878308	ID_1592	22	0	20.98	17.35	34.31
GRMZM2G128651	ID_1617	22	0	5.41	4.49	8.28
GRMZM2G154223	ID_1633	22	0	9.18	10.41	14.05
GRMZM2G031637	ID_1655	22	0	3.1	4.97	13.74
GRMZM2G067910	ID_1659	22	0	1.62	2.12	5.86
GRMZM2G051005	ID_1712	22	0	2.05	1.72	3.98
GRMZM2G091540	ID_1741	22	0	1.38	0.79	2.31
GRMZM2G098015	ID_1773	22	0	1.07	1.32	2.02
GRMZM2G168077	ID_1841	22	0	0.6	0.83	1.66
GRMZM2G120918	ID_17	21	0	291.9	295.41	286.31
GRMZM5G877985	ID_47	21	0	8.7	7.41	5.71
GRMZM2G035665	ID_88	21	0	7.76	6.5	7.09
GRMZM2G015432	ID_154	21	0	9.06	6.33	5.1
GRMZM2G312521	ID_180	21	0	5.14	6.35	6.69
GRMZM2G414727	ID_221	21	0	1.23	1.26	1.6
GRMZM2G092823	ID_224	21	0	7.9	8.57	9.72
GRMZM5G821791	ID_295	21	0	2.43	2.12	1.94
GRMZM2G439049	ID_328	21	0	1.84	1.65	1.77
GRMZM2G056799	ID_658	21	0	5.34	5.27	3.18
GRMZM2G116542	ID_685	21	0	1.01	1.29	1.2
GRMZM2G476636	ID_802	21	0	2.42	2.62	1.85
GRMZM2G047713	ID_1013	21	0	18.41	19.86	14.43
GRMZM2G173809	ID_1018	21	0	9.64	10.03	7.58
GRMZM2G565940	ID_1103	21	0	23.12	20.91	17.61
GRMZM2G432839	ID_1172	21	0	1.53	1.68	1.03
GRMZM2G310795	ID_1176	21	0	4.17	3.78	5.45
GRMZM5G801091	ID_1180	21	0	8.92	7.34	5.53
AC194402.2_FG004	ID_1197	21	0	1.93	1.82	1.46
GRMZM2G422539	ID_1224	21	0	3.33	2.21	2.08
GRMZM2G325786	ID_1263	21	0	1.01	0.76	1
GRMZM2G331088	ID_1287	21	0	1.84	1.22	2.02
GRMZM2G365053	ID_1288	21	0	2.52	1.65	1.2
GRMZM2G422537	ID_1305	21	0	1.3	0.87	1.08
AC230011.2_FG002	ID_1316	21	0	1.08	0.74	0.86
GRMZM2G063322	ID_1371	21	0	9.03	9.65	8.18
AC210669.3_FG001	ID_1426	21	0	153.88	104.59	75.91
GRMZM2G034471	ID_1493	21	0	1.25	1.54	1.61
GRMZM2G427451	ID_1515	21	0	19.72	16.84	19.91
GRMZM2G413006	ID_1519	21	0	15.99	14.25	11.65
GRMZM2G073788	ID_1529	21	0	3.91	5.61	4.74
GRMZM2G014844	ID_1563	21	0	75.23	101.05	92.6
GRMZM2G084521	ID_1591	21	0	11	9.55	11.58
GRMZM2G019356	ID_1600	21	0	25.53	29.26	29.01
GRMZM2G153615	ID_1610	21	0	4.28	6.14	5.35
GRMZM2G075117	ID_1624	21	0	8.87	5.28	8.02
GRMZM2G370081	ID_1644	21	0	8.67	9.12	5.09
GRMZM2G069649	ID_1674	21	0	10.36	10.81	11.23
GRMZM2G082976	ID_1683	21	0	2.3	1.54	1.82
GRMZM2G098527	ID_1713	21	0	3.35	2.25	3.05
AC200057.4_FG007	ID_1715	21	0	2.44	2.8	2.87
GRMZM2G154578	ID_1732	21	0	2.32	2.58	1.71
GRMZM2G476322	ID_1734	21	0	4.15	3.28	4.34
GRMZM2G059517	ID_1737	21	0	1.39	0.95	1.55
GRMZM2G063533	ID_1765	21	0	2.06	2.05	1.33
GRMZM2G064608	ID_1833	21	0	2.1	1.79	2.16
GRMZM2G173868	ID_1835	21	0	4.13	2.98	2.18
GRMZM2G350734	ID_1853	21	0	3.22	2.22	2.22
GRMZM2G375487	ID_1879	21	0	2.69	1.92	1.26
GRMZM2G101875	ID_72	19	0	5.25	0.1	4.17
AC233893.1_FG006	ID_78	19	0	9.37	-6.61	3.18
GRMZM2G011355	ID_109	19	0	3.59	0.59	6
GRMZM2G160032	ID_110	19	0	3.05	-1.2	1.85
GRMZM2G126781	ID_127	19	0	5.79	-3.91	2.39
GRMZM2G305856	ID_137	19	0	7.61	-3.3	7.09
GRMZM2G127695	ID_138	19	0	12.15	2.48	13.78
GRMZM2G006765	ID_150	19	0	5.31	-2.69	11.57
GRMZM2G048165	ID_163	19	0	2.45	-1.24	1.22
GRMZM2G077776	ID_169	19	0	14.5	6.17	15.17
GRMZM2G081822	ID_185	19	0	2.38	-2.65	2.95
GRMZM2G423555	ID_187	19	0	1.81	-1	2.1
GRMZM2G085392	ID_226	19	0	3.73	-2.84	2.35
GRMZM2G144051	ID_260	19	0	3.97	0.25	5.39
GRMZM2G331638	ID_266	19	0	1.73	-0.05	2.81
GRMZM2G366142	ID_270	19	0	3.4	-0.55	6.38
GRMZM2G139193	ID_272	19	0	1.97	-0.28	2.01
GRMZM2G032594	ID_277	19	0	1.64	-0.63	1.13
GRMZM2G037146	ID_281	19	0	0.54	-0.74	1.38
GRMZM2G078050	ID_284	19	0	2.49	-1.45	2.2
GRMZM2G126972	ID_285	19	0	2.65	-0.9	1.69
GRMZM2G032619	ID_293	19	0	2.07	-1.03	1.21
GRMZM2G167578	ID_318	19	0	1.4	0.58	1.36
GRMZM2G300133	ID_321	19	0	0.7	-0.76	1.72
AC217887.3_FG004	ID_329	19	0	0.71	-0.04	0.96
GRMZM2G064744	ID_341	19	0	1.66	-0.75	1.04
GRMZM2G094352	ID_362	19	0	1.14	0.19	0.86
GRMZM2G012904	ID_368	19	0	0.82	-0.55	1.63
GRMZM2G061515	ID_424	19	0	10.37	3.55	8.33
GRMZM2G151516	ID_442	19	0	2.49	-0.12	3.56
GRMZM2G133400	ID_523	19	0	4.56	-7.94	11.1
GRMZM2G159700	ID_660	19	0	2.01	0.77	1.28
GRMZM2G147319	ID_810	19	0	1.5	0.52	1.59
GRMZM2G402417	ID_864	19	0	300.86	18.25	241.41
AC202185.4_FG004	ID_872	19	0	70.93	-24.38	31.34
GRMZM2G096269	ID_879	19	0	41.88	-17.68	32.57
GRMZM2G023291	ID_886	19	0	3.34	0.16	6.94
GRMZM2G096247	ID_888	19	0	33.39	-21.71	17.97
AC205362.4_FG002	ID_909	19	0	11.15	-5.44	5.13
GRMZM2G383404	ID_911	19	0	10.72	-3.88	8.46
GRMZM2G043489	ID_917	19	0	2.35	0.12	3.47
GRMZM2G320152	ID_924	19	0	7.35	-2.38	4.62
GRMZM2G372684	ID_932	19	0	4.7	-3.73	3.63
GRMZM2G127134	ID_934	19	0	9.39	0.63	8.68
GRMZM2G164814	ID_975	19	0	2.22	-0.74	4.69
GRMZM2G081583	ID_985	19	0	1.6	-1.81	1.8
GRMZM2G027385	ID_991	19	0	1.91	-1.34	1.91
GRMZM2G106748	ID_992	19	0	1.9	-1.81	2.46
GRMZM2G078024	ID_993	19	0	1	-0.31	2.32
GRMZM2G003909	ID_996	19	0	8.41	-0.97	10.61
GRMZM2G162276	ID_1062	19	0	171.87	-45.73	98.67
GRMZM2G049915	ID_1070	19	0	67.41	-57.89	166.6
GRMZM2G001934	ID_1128	19	0	8.21	2.71	6.03
GRMZM2G078320	ID_1140	19	0	6.45	-3.76	3.13
GRMZM2G029455	ID_1142	19	0	7.99	-0.95	9.99
GRMZM2G029029	ID_1154	19	0	4.81	-4.22	3.39
GRMZM2G123558	ID_1156	19	0	14.99	-2.39	16.14
GRMZM2G080530	ID_1175	19	0	12.12	0.77	7.22
GRMZM2G025231	ID_1181	19	0	6.85	1.49	4.86
GRMZM2G049913	ID_1192	19	0	5.79	1.17	5.35
GRMZM2G553687	ID_1218	19	0	1.13	-0.42	2.21
GRMZM2G477879	ID_1221	19	0	3.06	0.65	3.55
GRMZM2G312026	ID_1231	19	0	1.62	-0.73	0.96
GRMZM2G380777	ID_1246	19	0	2.59	0.14	1.61
GRMZM2G373322	ID_1256	19	0	1.86	0.77	1.49
GRMZM2G319167	ID_1265	19	0	1.18	-0.41	1.45
GRMZM2G405064	ID_1268	19	0	1.06	-0.72	2.23
GRMZM2G340353	ID_1280	19	0	1	-0.03	0.63
AC205730.3_FG002	ID_1300	19	0	0.38	-0.34	0.95
GRMZM2G397368	ID_1307	19	0	2.29	0.68	1.34
GRMZM2G167318	ID_1308	19	0	1.92	0.18	1.65
GRMZM2G156310	ID_1332	19	0	0.82	-0.27	0.72
GRMZM2G041866	ID_1339	19	0	10.09	0.02	6.08
GRMZM2G099867	ID_1399	19	0	15.36	-4.73	18.73
GRMZM2G031102	ID_1403	19	0	13.69	-4.24	16.11
GRMZM2G101958	ID_1427	19	0	58.27	-23.92	21.86
GRMZM2G082131	ID_1468	19	0	2.38	-0.47	2.56
GRMZM5G854138	ID_1502	19	0	431.42	-160.1	266.94
GRMZM2G097884	ID_1506	19	0	90.08	-25.02	124.54
AC155352.2_FG010	ID_1581	19	0	46.74	11.05	60.81
GRMZM5G822591	ID_1598	19	0	8.25	2.28	4.93
GRMZM2G005947	ID_1605	19	0	0.96	-0.37	1.27
GRMZM2G059556	ID_1619	19	0	10.2	2.53	9.45
GRMZM2G427697	ID_1647	19	0	16.58	7.51	20.75
GRMZM2G078656	ID_1648	19	0	2.86	1.22	3.14
GRMZM2G171408	ID_1695	19	0	6.27	1.01	5.05
GRMZM2G405459	ID_1714	19	0	4.27	-2.45	2.95
GRMZM2G106276	ID_1738	19	0	3.06	-0.95	1.82
GRMZM2G112965	ID_1743	19	0	2.14	-0.46	1.09
GRMZM2G006714	ID_1747	19	0	2.14	0.11	2.13
GRMZM2G419953	ID_1752	19	0	3.79	1.1	2.64
GRMZM2G349791	ID_1759	19	0	1.43	0.68	1.22
GRMZM2G027098	ID_1811	19	0	4.18	-3.01	3.9
GRMZM2G319878	ID_1826	19	0	11.41	2.53	14.95
GRMZM2G181081	ID_1828	19	0	5.24	0.97	4.34
GRMZM2G560811	ID_14	18	0	166.83	-2.57	51.6
GRMZM2G073814	ID_37	18	0	16.95	-13.92	-12.74
GRMZM2G022931	ID_44	18	0	29.68	-20.82	-5.33
GRMZM2G032095	ID_124	18	0	1.85	-0.56	0.56
GRMZM2G132303	ID_126	18	0	9.15	-3.37	2.06
GRMZM5G807267	ID_155	18	0	4.38	-2.88	-1.75
GRMZM2G079889	ID_156	18	0	6.61	2.46	0.83
GRMZM2G075489	ID_175	18	0	4.9	-1.39	-1.19
GRMZM2G032865	ID_201	18	0	5.47	2.51	1.12
GRMZM5G894582	ID_251	18	0	2.23	-0.56	-0.72
GRMZM2G108997	ID_361	18	0	1.6	0.19	-0.3
GRMZM2G136364	ID_418	18	0	98.59	20.47	13.49
GRMZM2G170400	ID_421	18	0	19.23	-9.12	-2.11
GRMZM2G423898	ID_432	18	0	27.17	8.62	4.28
GRMZM2G044132	ID_435	18	0	49.24	20.23	8.68
GRMZM2G502467	ID_445	18	0	3.51	1.32	1.73
GRMZM2G009465	ID_881	18	0	155.88	-68.86	-44.78
GRMZM2G017991	ID_891	18	0	41.96	-29.55	3.25
GRMZM2G147849	ID_892	18	0	9.68	-9.3	-5.15
GRMZM2G356817	ID_894	18	0	19.69	-3.23	5.26
GRMZM2G109814	ID_900	18	0	19.42	-14.12	4.59
GRMZM2G461716	ID_906	18	0	12.6	-7.22	-5.2
GRMZM2G044947	ID_926	18	0	9.57	-3.61	0.02
GRMZM2G444801	ID_933	18	0	7.7	-0.81	2.05
GRMZM2G061230	ID_949	18	0	7.17	-7.53	-3.4
GRMZM2G099967	ID_970	18	0	2.97	-3.06	-1.41
GRMZM2G089056	ID_977	18	0	3.13	-0.47	0.59
GRMZM2G042127	ID_1004	18	0	1	-0.65	0.05
GRMZM2G150841	ID_1007	18	0	2.1	-0.15	0.69
GRMZM2G149624	ID_1016	18	0	8.41	2.14	1.37
GRMZM2G001514	ID_1083	18	0	26.22	-19.46	5.76
AC210193.4_FG002	ID_1100	18	0	28.96	3.35	3.13
GRMZM2G008247	ID_1105	18	0	48.8	-23.78	-21.08
GRMZM5G866581	ID_1109	18	0	7.85	0.35	0.71
GRMZM2G439884	ID_1127	18	0	11.73	4.07	5.02
GRMZM2G163200	ID_1129	18	0	7.33	-3.46	-0.69
GRMZM2G061969	ID_1139	18	0	3.67	-3.78	-2.01
GRMZM2G103512	ID_1145	18	0	25.84	8.07	5.22
GRMZM2G101613	ID_1149	18	0	4.32	-3.15	-3.19
GRMZM2G076946	ID_1160	18	0	12.32	-10	-7.26
GRMZM2G160585	ID_1164	18	0	6.58	-0.33	-1.48
GRMZM2G077015	ID_1195	18	0	6.68	-6.82	-4.73
GRMZM2G074267	ID_1196	18	0	2.05	-1.64	0.16
AC229978.2_FG002	ID_1205	18	0	2.9	-0.61	-0.15
GRMZM2G055698	ID_1207	18	0	5.95	-2.63	-3.24
GRMZM2G465769	ID_1222	18	0	2.47	0.35	1.06
GRMZM2G120110	ID_1248	18	0	3.03	0.25	-0.14
GRMZM2G148098	ID_1257	18	0	2.33	0.38	-0.22
GRMZM2G384516	ID_1258	18	0	2.37	-0.37	-0.04
GRMZM2G043663	ID_1266	18	0	2.52	-2.16	-0.6
GRMZM2G401664	ID_1270	18	0	5.52	0.29	-0.08
GRMZM2G049695	ID_1271	18	0	2.66	-0.79	-0.55
GRMZM2G127853	ID_1272	18	0	2.63	-2	-0.21
GRMZM2G111926	ID_1274	18	0	3.62	-2.44	0.35
GRMZM5G876450	ID_1275	18	0	2.05	0.91	1.12
GRMZM2G113203	ID_1286	18	0	1.07	-1.01	-0.06
GRMZM2G067915	ID_1290	18	0	1.56	-0.94	-0.71
GRMZM2G123446	ID_1291	18	0	1.49	-0.3	-0.44
GRMZM2G016558	ID_1296	18	0	0.89	-0.58	-0.16
GRMZM2G162450	ID_1312	18	0	1.9	-0.16	-0.4
GRMZM2G461671	ID_1313	18	0	1.42	-1.23	-0.66
GRMZM2G356423	ID_1320	18	0	2.03	1.1	0.61
AC226227.2_FG003	ID_1334	18	0	2.53	-0.85	-0.45
GRMZM2G069325	ID_1336	18	0	1.46	-0.74	-0.51
GRMZM2G353469	ID_1341	18	0	0.69	-0.66	-0.35
GRMZM2G070304	ID_1342	18	0	0.71	-0.54	-0.59
GRMZM2G051943	ID_1344	18	0	2.56	-0.67	-0.59
GRMZM2G323415	ID_1346	18	0	1.99	0.95	0.38
GRMZM2G108959	ID_1348	18	0	3.5	-0.48	-0.11
GRMZM2G124799	ID_1360	18	0	3.52	0.28	-0.15
GRMZM2G354558	ID_1374	18	0	0.59	-0.48	-0.37
GRMZM5G832229	ID_1397	18	0	24.74	-5.53	-2.3
GRMZM2G316275	ID_1478	18	0	5.44	-1.66	1.55
GRMZM2G007249	ID_1486	18	0	4.84	0.51	1.18
GRMZM2G305280	ID_1505	18	0	154.09	-190.06	-53.49
GRMZM2G107711	ID_1512	18	0	38.93	-3.32	2.8
GRMZM2G114127	ID_1514	18	0	58.79	-16.02	7.93
GRMZM2G156692	ID_1527	18	0	3.73	1.4	0.52
GRMZM2G078274	ID_1571	18	0	33.41	10.1	7.4
GRMZM2G066602	ID_1606	18	0	7.96	-8.65	-2.77
GRMZM2G304947	ID_1628	18	0	7.95	-6.14	-4.27
GRMZM2G352132	ID_1673	18	0	6.46	1.54	2.33
GRMZM2G309193	ID_1681	18	0	3.81	-1.57	-0.94
GRMZM2G077036	ID_1699	18	0	1.69	-0.53	0.58
GRMZM2G463445	ID_1701	18	0	3.97	-0.16	1.33
GRMZM2G159285	ID_1718	18	0	3.17	1.18	1.74
GRMZM2G111216	ID_1750	18	0	1.25	-0.95	-0.29
GRMZM2G179147	ID_1751	18	0	3.25	1.3	1.21
GRMZM2G014770	ID_1757	18	0	0.77	-0.44	-0.12
GRMZM2G010435	ID_1785	18	0	3.25	-1.55	-0.43
GRMZM2G107839	ID_1797	18	0	38.1	-23.55	-9.71
GRMZM2G478414	ID_1802	18	0	25.66	-22.53	-15.92
GRMZM2G418343	ID_1806	18	0	32.14	-13.8	-9.11
GRMZM2G089493	ID_1807	18	0	31.84	-8.04	0.36
GRMZM2G045215	ID_1808	18	0	12.29	-7.34	-1.91
GRMZM2G088919	ID_1810	18	0	4.51	-1.86	-0.14
GRMZM2G017869	ID_1854	18	0	7.04	-1.1	-0.26
GRMZM2G085381	ID_1867	18	0	47.58	-10.51	-21.6
GRMZM2G081536	ID_58	17	0	11.21	-2.1	-17.03
GRMZM2G156861	ID_113	17	0	24.98	6.22	-11.03
GRMZM2G127180	ID_141	17	0	1.35	-0.49	-1.65
GRMZM2G153760	ID_193	17	0	2.75	0.09	-2.68
GRMZM2G320298	ID_236	17	0	1.35	-0.9	-1.21
GRMZM2G093175	ID_378	17	0	0.87	0.1	-0.28
GRMZM2G066636	ID_420	17	0	8.99	-6.85	-8.49
GRMZM2G120938	ID_426	17	0	2.73	-1.8	-2.42
AC208204.3_FG006	ID_488	17	0	19.75	0.84	-8.53
GRMZM2G065989	ID_489	17	0	163.21	75.54	-27.69
GRMZM5G832939	ID_553	17	0	17.02	10.11	-15.16
GRMZM2G472643	ID_646	17	0	3.2	0.58	-2.13
GRMZM2G069126	ID_670	17	0	6.57	2.24	-4.15
GRMZM2G125838	ID_683	17	0	3.29	0.48	-2.86
GRMZM2G167336	ID_750	17	0	3.51	1.11	-0.83
GRMZM2G042278	ID_755	17	0	1.39	0.54	-1.04
GRMZM2G020254	ID_761	17	0	0.71	-0.07	-0.46
GRMZM2G453805	ID_770	17	0	0.47	0.09	-0.84
GRMZM2G103617	ID_1009	17	0	27.44	14.09	-29.11
GRMZM2G106950	ID_1020	17	0	9.33	-2.02	-8.59
GRMZM2G400714	ID_1025	17	0	6.06	3.88	-5.35
GRMZM2G120320	ID_1036	17	0	1.15	-0.08	-2.15
GRMZM2G092427	ID_1071	17	0	68.55	-28.18	-92.63
GRMZM2G144155	ID_1111	17	0	7.4	-4.5	-7.08
GRMZM2G131912	ID_1135	17	0	4.86	-0.01	-3.86
GRMZM2G445478	ID_1210	17	0	3.83	-0.2	-2.22
GRMZM2G179279	ID_1215	17	0	2.3	-1.3	-3.84
GRMZM2G168365	ID_1235	17	0	3.63	-2.2	-3.73
GRMZM2G082633	ID_1259	17	0	0.69	0.02	-1
GRMZM2G146878	ID_1289	17	0	1.06	-0.52	-0.9
GRMZM2G477340	ID_1325	17	0	0.92	-0.67	-0.83
GRMZM2G154678	ID_1338	17	0	0.89	0.24	-0.24
GRMZM2G134279	ID_1350	17	0	1.72	0.63	-0.46
GRMZM5G836174	ID_1435	17	0	76.14	40.32	-36.36
GRMZM2G060311	ID_1444	17	0	28.45	15.92	-11.05
GRMZM5G877929	ID_1463	17	0	6.13	3.8	-8.06
GRMZM2G085661	ID_1508	17	0	23.35	-13.79	-30.13
GRMZM2G004590	ID_1703	17	0	0.87	-0.31	-0.74
GRMZM2G123373	ID_1705	17	0	2.97	1.21	-0.62
GRMZM2G046952	ID_1720	17	0	2.44	0.13	-2.09
GRMZM2G009804	ID_1729	17	0	1.66	0.68	-0.17
GRMZM2G055802	ID_1778	17	0	22.85	19.02	-24.49
GRMZM5G852886	ID_1784	17	0	13	4.53	-4.63
GRMZM2G161097	ID_1820	17	0	9.9	-8.33	-13.52
AC204711.3_FG002	ID_1825	17	0	11.93	-5.76	-12.89
GRMZM2G013463	ID_131	16	0	-0.03	0.58	2.14
GRMZM2G173067	ID_147	16	0	0.02	5.49	18.08
GRMZM2G079683	ID_203	16	0	-1.25	1.02	4.89
GRMZM2G177220	ID_214	16	0	0.39	1.15	2.25
GRMZM2G327208	ID_308	16	0	0.37	0.96	2.63
GRMZM2G044104	ID_358	16	0	-0.14	0.59	1.6
GRMZM5G862317	ID_371	16	0	0.31	1.91	5.15
GRMZM2G418263	ID_372	16	0	-0.13	0.26	0.88
GRMZM2G453963	ID_389	16	0	0.09	0.39	1.34
GRMZM2G026930	ID_429	16	0	-0.83	0.79	4.09
GRMZM2G086202	ID_893	16	0	-2.54	3.32	8.83
GRMZM2G124744	ID_902	16	0	11.4	18.16	52.7
GRMZM5G897473	ID_931	16	0	0.31	2.62	3.77
GRMZM2G092743	ID_1069	16	0	0.15	37.99	95.63
GRMZM2G386995	ID_1170	16	0	0.66	5.56	8.78
GRMZM2G444567	ID_1251	16	0	-0.8	1.32	4.05
GRMZM5G828312	ID_1388	16	0	-15.89	33.36	65.39
GRMZM2G067992	ID_1390	16	0	-6.26	34.82	65.97
GRMZM2G395853	ID_1415	16	0	1.1	4.12	6.97
GRMZM2G138572	ID_1630	16	0	-3.8	8.04	13.75
GRMZM2G174769	ID_1711	16	0	-0.54	1.08	2.04
GRMZM2G381842	ID_1768	16	0	0.14	0.65	1.47
GRMZM2G053307	ID_1813	16	0	1.26	16.43	22.43
GRMZM2G099097	ID_63	15	0	-1.37	13.05	12.78
GRMZM2G003368	ID_85	15	0	-0.56	15.39	9.92
GRMZM2G053117	ID_439	15	0	-0.2	1.29	0.63
GRMZM2G101499	ID_726	15	0	0.15	2.52	2.73
GRMZM2G377451	ID_785	15	0	0.06	1.01	0.51
GRMZM2G163307	ID_912	15	0	-1.08	16.22	13.58
GRMZM2G476810	ID_986	15	0	0.3	2.22	2.21
GRMZM2G044762	ID_1074	15	0	-4.52	36.11	32.61
GRMZM2G180246	ID_1085	15	0	2.32	49.62	53.86
GRMZM2G389567	ID_1095	15	0	2.55	15.69	15.85
GRMZM2G163546	ID_1098	15	0	1.02	13.41	13.46
GRMZM2G319062	ID_1107	15	0	2.25	19	20.93
GRMZM2G063462	ID_1120	15	0	-2.63	7.51	2.9
GRMZM2G168404	ID_1159	15	0	-2.23	2.07	2.12
GRMZM2G113196	ID_1161	15	0	0.95	8.92	4.81
GRMZM2G472945	ID_1171	15	0	-1.25	2.86	2.04
GRMZM2G377694	ID_1189	15	0	-1.34	4.86	6.03
GRMZM2G067624	ID_1209	15	0	1.73	9.12	6.87
GRMZM2G030223	ID_1219	15	0	-0.28	3.26	3.67
GRMZM2G076621	ID_1317	15	0	-0.47	1.16	0.7
GRMZM2G034206	ID_1409	15	0	2.36	11.69	13.32
GRMZM2G105587	ID_1503	15	0	-16.61	107.64	96.93
GRMZM2G144653	ID_1504	15	0	1.5	218.21	111.21
GRMZM2G174092	ID_1517	15	0	0.54	11.7	11.93
GRMZM2G150984	ID_1522	15	0	0.95	5.53	5.06
GRMZM2G470608	ID_1525	15	0	0.22	7.54	6.46
GRMZM2G006704	ID_1544	15	0	-24.42	47.01	50.71
GRMZM2G389768	ID_1549	15	0	8.08	130.47	77.83
GRMZM2G003752	ID_1558	15	0	-2.64	13.9	9.06
GRMZM2G172357	ID_1568	15	0	9.07	52.73	40.55
GRMZM2G107756	ID_1607	15	0	4.27	39.87	22.92
GRMZM2G132862	ID_1618	15	0	-1.32	22.44	19.42
GRMZM2G047434	ID_1641	15	0	0.49	3.71	4.73
GRMZM2G351990	ID_1686	15	0	0.72	5.51	4.43
GRMZM2G478430	ID_1724	15	0	0.05	0.81	1.07
GRMZM5G893392	ID_1742	15	0	-0.77	1.12	0.99
GRMZM2G167649	ID_1792	15	0	-8.07	120.22	129.61
GRMZM2G445958	ID_1793	15	0	-0.26	6.24	4.5
GRMZM2G058402	ID_1804	15	0	3.95	30.82	38.73
GRMZM2G136085	ID_1842	15	0	0.32	2.17	2.22
GRMZM2G019721	ID_1878	15	0	0.61	3.11	2.2
GRMZM2G029720	ID_38	12	0	-9.46	-2.65	-27.09
GRMZM2G155783	ID_118	12	0	-0.64	5.5	-16.21
GRMZM2G043932	ID_254	12	0	0.95	1.81	-3.62
GRMZM2G146511	ID_326	12	0	0.46	0.73	-1.81
GRMZM2G449197	ID_348	12	0	0.18	0.24	-0.78
GRMZM2G020150	ID_422	12	0	3.82	8.9	-12.54
GRMZM2G425482	ID_469	12	0	-2.46	38.73	-43.5
GRMZM2G310368	ID_478	12	0	20.65	46.23	-41.37
GRMZM2G099239	ID_485	12	0	5.75	7.78	-24.55
GRMZM2G044902	ID_525	12	0	4.3	14.81	-11.93
GRMZM2G131340	ID_527	12	0	5.27	12.34	-12.47
GRMZM2G100391	ID_561	12	0	2.61	5.44	-5.96
GRMZM2G174558	ID_575	12	0	2.74	2.97	-5.29
GRMZM5G813661	ID_598	12	0	-0.83	2.55	-7.71
GRMZM2G069146	ID_600	12	0	-3.14	-0.24	-8.94
GRMZM5G801190	ID_620	12	0	2.05	3.46	-3.87
GRMZM2G103647	ID_644	12	0	-0.18	0.49	-3.74
GRMZM2G310947	ID_648	12	0	-0.77	0.88	-2.82
GRMZM2G421946	ID_653	12	0	2.36	2.78	-4.51
GRMZM5G801949	ID_659	12	0	-0.09	1.93	-2.18
GRMZM2G041809	ID_666	12	0	1.08	1.35	-2.28
GRMZM2G023237	ID_681	12	0	1.04	1.69	-2.59
GRMZM2G379540	ID_695	12	0	1.91	1.73	-2.12
GRMZM2G144997	ID_697	12	0	0.44	3.28	-3.01
GRMZM2G069511	ID_698	12	0	0.76	0.27	-2
GRMZM2G478212	ID_699	12	0	-0.23	0.81	-1.3
GRMZM2G081214	ID_752	12	0	-0.24	0.33	-0.97
GRMZM2G105987	ID_762	12	0	0.39	1.18	-1.19
GRMZM2G510796	ID_1402	12	0	-0.33	-0.8	-3.22
GRMZM2G174396	ID_1467	12	0	1.64	2.89	-5.5
GRMZM2G359365	ID_1473	12	0	1.54	1.04	-3.67
GRMZM2G177110	ID_1477	12	0	1.96	2.89	-3.3
GRMZM2G026576	ID_1483	12	0	-0.22	1.32	-2
GRMZM2G166035	ID_1569	12	0	-1.4	-0.72	-23.41
GRMZM2G177518	ID_1685	12	0	-0.65	-0.11	-3.53
GRMZM2G174984	ID_28	10	0	-15.99	-64.87	-63.27
GRMZM5G821637	ID_29	10	0	-6.19	-47.64	-53.51
AC196475.3_FG004	ID_43	10	0	3.54	-17.35	-13.64
GRMZM2G077127	ID_59	10	0	1.01	-11.84	-13.38
GRMZM2G061932	ID_97	10	0	4.89	-8.28	-11.76
GRMZM2G127147	ID_269	10	0	0.16	-2.22	-1.57
GRMZM2G387528	ID_271	10	0	-0.5	-1.81	-1.94
GRMZM2G089895	ID_317	10	0	0.56	-1.36	-0.75
GRMZM2G160730	ID_425	10	0	1.73	-4.11	-5.09
GRMZM5G884600	ID_613	10	0	0.42	-2.35	-3.25
GRMZM2G398807	ID_859	10	0	-36.2	-185.48	-193.58
GRMZM2G384780	ID_861	10	0	44.21	-204	-142.23
GRMZM2G451224	ID_862	10	0	-13.29	-125.4	-153.26
GRMZM2G372102	ID_866	10	0	0.23	-54.65	-38.72
GRMZM2G038519	ID_869	10	0	9.4	-68.53	-88.19
GRMZM2G017290	ID_870	10	0	-10.77	-59.28	-65.03
GRMZM2G098239	ID_873	10	0	-7.92	-68.72	-40.78
GRMZM2G001241	ID_875	10	0	3.9	-36.62	-37.38
GRMZM2G010868	ID_877	10	0	24.5	-63.32	-52.32
GRMZM2G154628	ID_898	10	0	12.2	-31.29	-26.94
GRMZM2G154211	ID_901	10	0	0.43	-5.97	-6.17
GRMZM2G089836	ID_907	10	0	4.9	-9.06	-7.86
GRMZM2G035503	ID_908	10	0	8.48	-12.84	-7.84
GRMZM2G036861	ID_918	10	0	-1.53	-12.58	-10.04
GRMZM2G052562	ID_922	10	0	3.97	-12.12	-5.54
GRMZM2G137108	ID_935	10	0	4.7	-4.88	-6.76
GRMZM2G339645	ID_936	10	0	-0.34	-7.34	-4.98
GRMZM2G314660	ID_948	10	0	1.39	-4.73	-3.13
GRMZM2G333923	ID_953	10	0	3.44	-5.7	-1.83
GRMZM2G075295	ID_967	10	0	1.1	-4.66	-3.84
GRMZM2G056236	ID_973	10	0	1.98	-2.32	-2.08
GRMZM5G805382	ID_1019	10	0	10.66	-14.35	-11.34
GRMZM2G134178	ID_1024	10	0	4.58	-7.99	-6.62
GRMZM2G086876	ID_1029	10	0	0.08	-1.42	-1.39
GRMZM2G081603	ID_1031	10	0	2.98	-3.48	-2.92
GRMZM2G091313	ID_1035	10	0	0.39	-1.9	-1.46
GRMZM2G064096	ID_1057	10	0	205.85	-363.89	-465.11
GRMZM2G063756	ID_1061	10	0	-18.75	-163.38	-208.85
GRMZM2G047720	ID_1077	10	0	-10.37	-66.14	-75.25
GRMZM2G116632	ID_1080	10	0	5.14	-33.77	-43.29
GRMZM2G168304	ID_1110	10	0	9.75	-16.71	-19.36
GRMZM2G309847	ID_1116	10	0	1.51	-21.7	-16.45
GRMZM2G016649	ID_1123	10	0	2.24	-8.66	-11.63
GRMZM2G036217	ID_1125	10	0	-0.19	-13.33	-14.94
GRMZM2G059693	ID_1126	10	0	16.87	-22.57	-22.72
GRMZM2G029101	ID_1131	10	0	7.51	-9.93	-6.5
GRMZM2G079123	ID_1151	10	0	-0.08	-6.14	-4.58
GRMZM2G030009	ID_1158	10	0	-0.84	-6.94	-5.2
AC199765.4_FG008	ID_1177	10	0	2.27	-5.46	-3.05
GRMZM2G042181	ID_1182	10	0	4.11	-5.81	-2.59
GRMZM2G174680	ID_1183	10	0	3.08	-3.19	-3.72
GRMZM2G079616	ID_1184	10	0	1.34	-7.41	-7.36
GRMZM2G037284	ID_1187	10	0	2.03	-6.6	-6.3
GRMZM2G432926	ID_1188	10	0	2.01	-3.34	-1.24
GRMZM5G859526	ID_1191	10	0	4.72	-5.87	-3.27
GRMZM2G443495	ID_1206	10	0	2.18	-4.42	-3.97
GRMZM2G169967	ID_1211	10	0	2.48	-4.03	-3.41
AC199068.2_FG017	ID_1213	10	0	0.67	-2.98	-2.94
GRMZM2G142870	ID_1214	10	0	1.19	-1.37	-2.11
GRMZM2G147867	ID_1220	10	0	0.24	-2.89	-2.26
GRMZM2G123246	ID_1223	10	0	1.01	-3.91	-3.01
GRMZM2G047129	ID_1225	10	0	1.06	-4.3	-3.21
GRMZM2G056750	ID_1230	10	0	0.69	-2.59	-2.24
GRMZM2G077206	ID_1240	10	0	-0.97	-3.84	-3.84
GRMZM2G057733	ID_1243	10	0	0.37	-2.08	-2.32
GRMZM2G169458	ID_1252	10	0	1.82	-2.46	-2.2
GRMZM2G082376	ID_1261	10	0	0.31	-2.61	-2.27
GRMZM2G147698	ID_1262	10	0	0.3	-2.38	-2.09
GRMZM2G030325	ID_1277	10	0	0.41	-1.79	-1.65
AC186231.4_FG002	ID_1278	10	0	1.43	-2.57	-1.94
GRMZM2G085678	ID_1282	10	0	0.67	-2.08	-1
GRMZM2G178136	ID_1294	10	0	0.55	-1.53	-1.09
GRMZM2G057086	ID_1303	10	0	0.55	-0.87	-0.72
GRMZM2G094304	ID_1327	10	0	0.43	-0.97	-1.08
GRMZM2G114356	ID_1363	10	0	-1.52	-575.12	-506.45
GRMZM2G034152	ID_1509	10	0	26.93	-49.06	-41.42
GRMZM2G036880	ID_1510	10	0	0.46	-34.87	-45.81
GRMZM2G097141	ID_1518	10	0	-1.62	-12.16	-10.54
GRMZM2G026143	ID_1524	10	0	0.97	-8.71	-9.11
GRMZM2G457621	ID_1689	10	0	0.49	-2.87	-3.56
GRMZM2G145461	ID_1739	10	0	-0.51	-2.38	-2.14
GRMZM2G044247	ID_1754	10	0	0.42	-1.01	-0.4
GRMZM2G334660	ID_1758	10	0	-0.18	-0.95	-1.14
GRMZM2G154667	ID_1796	10	0	3.33	-7.08	-9.88
GRMZM2G565911	ID_1827	10	0	0.27	-7.41	-8.8
AC190623.3_FG001	ID_9	9	0	-26.95	-189.15	-274.49
GRMZM2G057281	ID_16	9	0	57.59	-106.15	-221.58
GRMZM2G380414	ID_26	9	0	3.91	-22.97	-50.05
GRMZM2G079782	ID_52	9	0	10.99	-11.79	-24.75
GRMZM5G855337	ID_89	9	0	0.14	-1.53	-4.89
GRMZM2G016640	ID_164	9	0	-0.15	-0.98	-2.16
GRMZM2G412207	ID_1015	9	0	3.49	-3.09	-9.6
GRMZM2G153184	ID_1072	9	0	-7.55	-60.33	-99.93
GRMZM5G804323	ID_1082	9	0	10.82	-36.69	-69.62
GRMZM2G072280	ID_1091	9	0	5.3	-23.62	-49.88
GRMZM2G177412	ID_1093	9	0	5.7	-17.02	-34.7
GRMZM2G003970	ID_1118	9	0	0.86	-9.32	-17.32
GRMZM2G015285	ID_1198	9	0	-0.12	-2.42	-4.78
GRMZM2G035749	ID_1472	9	0	-0.5	-1.49	-3.51
GRMZM2G330635	ID_1550	9	0	9.2	-20.38	-64.56
GRMZM2G012276	ID_1588	9	0	-3.12	-7.6	-15.54
GRMZM2G142383	ID_1677	9	0	1.16	-2.4	-4.45
GRMZM2G079908	ID_8	8	0	-113.74	-42.32	40.97
GRMZM2G068471	ID_34	8	0	-26.06	5.73	56.84
GRMZM2G433616	ID_100	8	0	-6.13	1.59	9.77
GRMZM2G082931	ID_135	8	0	-6.5	-1.21	1.66
GRMZM2G316232	ID_136	8	0	-3.13	-0.67	3.67
GRMZM2G015277	ID_177	8	0	-2.15	0.79	4.67
GRMZM2G116981	ID_186	8	0	-1.97	-0.53	0.55
GRMZM5G856297	ID_197	8	0	-2.28	-0.74	4.65
GRMZM2G170567	ID_213	8	0	-1.6	0.14	1.46
GRMZM2G399207	ID_217	8	0	-3.13	-1.81	2.49
GRMZM2G045128	ID_228	8	0	-1.26	-0.56	1.57
AC209705.3_FG004	ID_255	8	0	-1.22	0.07	1.76
GRMZM2G478382	ID_294	8	0	-1.51	-0.41	2.31
GRMZM2G368678	ID_296	8	0	-0.72	0	0.85
GRMZM2G049351	ID_297	8	0	-1.37	-0.62	0.25
GRMZM2G018142	ID_316	8	0	-0.43	0.06	0.89
GRMZM2G100754	ID_333	8	0	-1.76	-0.91	0.43
GRMZM2G107562	ID_876	8	0	-39.51	-9.2	17.86
AC190909.3_FG004	ID_937	8	0	-2.32	-0.01	2.5
GRMZM5G824439	ID_956	8	0	-0.58	0.21	1.88
GRMZM2G153797	ID_972	8	0	-0.83	0.54	1.64
GRMZM2G473310	ID_974	8	0	-0.95	-0.69	0.76
GRMZM2G370162	ID_981	8	0	-0.93	0.61	0.96
GRMZM2G475362	ID_998	8	0	-0.53	-0.21	0.81
GRMZM2G355773	ID_1066	8	0	-99.39	-17.31	89.79
GRMZM5G830403	ID_1087	8	0	-17.77	9.94	17.02
GRMZM2G154896	ID_1106	8	0	-8.13	-1.27	7.06
GRMZM2G088309	ID_1115	8	0	-3.88	1.76	5.07
GRMZM2G479245	ID_1132	8	0	-9.68	-4.95	7.18
GRMZM2G470292	ID_1137	8	0	-5.1	-2.38	2.35
GRMZM2G007922	ID_1228	8	0	-0.71	-0.5	0.55
GRMZM2G142802	ID_1384	8	0	-26.45	-5.23	14.02
GRMZM2G180384	ID_1389	8	0	-9.35	-7.06	8.06
AC190750.2_FG014	ID_1404	8	0	-2.95	-1.55	1.33
GRMZM2G039857	ID_1416	8	0	-0.65	0.33	1.27
GRMZM2G042118	ID_1559	8	0	-60.66	-12.81	30.62
GRMZM2G305154	ID_1575	8	0	-8.19	8.95	14.72
GRMZM2G150521	ID_1578	8	0	-14.94	-5.46	15.47
GRMZM2G089308	ID_1656	8	0	-2.08	1.71	3.81
GRMZM5G864001	ID_1851	8	0	-0.49	0.5	0.86
GRMZM2G110626	ID_86	7	0	-7.7	0.53	2.5
GRMZM2G115998	ID_128	7	0	-2.8	2.51	-0.14
GRMZM2G499182	ID_211	7	0	-2.9	-0.18	0.32
GRMZM2G109448	ID_460	7	0	-78.29	38.99	-19.52
GRMZM2G149178	ID_1058	7	0	-320.75	245.99	74.04
GRMZM2G025992	ID_1081	7	0	-23.02	14.68	0.82
GRMZM2G141499	ID_1117	7	0	-10.7	-1.04	-2.12
GRMZM2G314361	ID_1279	7	0	-1.17	-0.42	-0.6
GRMZM2G043127	ID_1537	7	0	-426.25	-181.32	-181.23
GRMZM2G304575	ID_1538	7	0	-413.22	-168.24	-99.55
GRMZM2G042047	ID_1543	7	0	-60.26	-24.3	-9.34
GRMZM2G177720	ID_1547	7	0	-65.86	-17.6	-29.94
GRMZM2G063972	ID_1658	7	0	-3.52	0.17	0.82
GRMZM2G073427	ID_1687	7	0	-2.33	-0.68	0
GRMZM2G359298	ID_1740	7	0	-0.96	0.22	-0.07
GRMZM2G465680	ID_1749	7	0	-0.92	0.01	0.09
GRMZM2G003306	ID_1817	7	0	-325.61	-14.83	-100.93
GRMZM2G048202	ID_1849	7	0	-1.67	0.74	-0.36
GRMZM2G099206	ID_335	6	0	-0.98	0.94	-1.75
GRMZM2G428216	ID_650	6	0	-2.37	2.57	-2.13
GRMZM2G157505	ID_722	6	0	-1.93	-0.63	-1.9
GRMZM2G420789	ID_957	6	0	-2.29	-0.79	-1.29
GRMZM2G348956	ID_1030	6	0	-0.43	0.56	-1.03
GRMZM2G471089	ID_1119	6	0	-6.02	3.13	-5.33
GRMZM5G842058	ID_1385	6	0	-35.03	-3.27	-50.11
GRMZM2G380784	ID_1484	6	0	-0.95	0.52	-1.31
GRMZM5G896560	ID_1511	6	0	-15.68	-3.24	-19.54
GRMZM2G057865	ID_1554	6	0	-33.17	0.96	-17.5
GRMZM2G157536	ID_1564	6	0	-14.86	3.05	-14.26
GRMZM2G098884	ID_1621	6	0	-4.91	0.81	-2.43
GRMZM2G111436	ID_1661	6	0	-2.01	3.08	-5.98
GRMZM2G314328	ID_1837	6	0	-2.55	1.03	-2.56
GRMZM2G158316	ID_1838	6	0	-2.37	1.88	-4.43
GRMZM2G043822	ID_5	5	0	-82.58	-78.48	51.49
GRMZM2G106133	ID_7	5	0	-204.92	-143.35	13.72
GRMZM2G090626	ID_12	5	0	-159.92	-169.67	25.02
GRMZM2G116282	ID_13	5	0	-151.16	-105.47	-20.3
GRMZM2G148646	ID_19	5	0	-104.66	-121.52	-53.22
GRMZM5G853513	ID_46	5	0	-7.66	-11.65	9.16
GRMZM2G079256	ID_56	5	0	-19.66	-17.12	3.6
GRMZM2G013619	ID_61	5	0	-10.7	-9.94	10.6
GRMZM2G175447	ID_67	5	0	-24.25	-19.95	5.31
AC198361.3_FG004	ID_68	5	0	-19.69	-18.72	-0.79
GRMZM2G169372	ID_75	5	0	-11.95	-18.73	-1.09
GRMZM2G066326	ID_83	5	0	-6.45	-11.65	2.36
GRMZM2G143357	ID_95	5	0	-2.49	-3.12	1.44
GRMZM2G322090	ID_96	5	0	-6.64	-6.16	3.87
GRMZM2G145753	ID_98	5	0	-3.15	-3.49	2.79
GRMZM2G458208	ID_99	5	0	-14.24	-16.84	0.74
AC233952.1_FG006	ID_101	5	0	-5.43	-10.57	0.02
GRMZM2G050108	ID_107	5	0	-11.31	-16.05	3.13
GRMZM2G110027	ID_114	5	0	-6.05	-9.72	-1.89
GRMZM2G110195	ID_117	5	0	-9.67	-15.06	-0.5
GRMZM2G095725	ID_120	5	0	-4.98	-3.75	-0.89
GRMZM2G168898	ID_133	5	0	-5.23	-11.09	0.25
AC210009.3_FG008	ID_134	5	0	-15.93	-15.9	-8.52
GRMZM2G001898	ID_142	5	0	-2.13	-4.54	0.78
GRMZM2G324956	ID_143	5	0	-10.66	-12.42	-2.15
GRMZM5G878582	ID_153	5	0	-2.93	-1.63	-0.9
GRMZM2G034302	ID_160	5	0	-6.33	-7.98	2.23
GRMZM2G347583	ID_162	5	0	-4.15	-2.22	0.53
GRMZM2G000964	ID_178	5	0	-4.69	-6.04	-0.52
GRMZM2G022958	ID_198	5	0	-8.08	-7.64	-3.96
GRMZM2G050514	ID_212	5	0	-2.41	-4.58	1.5
GRMZM2G170742	ID_215	5	0	-5.29	-6.03	3.74
GRMZM2G101270	ID_220	5	0	-0.62	-1.51	1.05
GRMZM2G358877	ID_231	5	0	-2.18	-1.84	1.92
GRMZM2G164229	ID_232	5	0	-2.32	-4.05	1.72
GRMZM5G836827	ID_233	5	0	-1.54	-2.23	1.22
GRMZM2G162286	ID_237	5	0	-1.76	-2.4	0.11
GRMZM2G422750	ID_241	5	0	-3.06	-1.93	-0.44
GRMZM2G084935	ID_244	5	0	-3.88	-4.22	1.72
GRMZM2G367701	ID_245	5	0	-2.11	-3.44	0.58
GRMZM5G807734	ID_253	5	0	-0.89	-1.19	0.78
GRMZM2G168744	ID_256	5	0	-2.5	-3.27	-0.36
GRMZM2G072808	ID_263	5	0	-1.74	-2.44	-0.52
GRMZM2G030444	ID_267	5	0	-2.65	-3.67	3.06
GRMZM2G320023	ID_278	5	0	-1.37	-1.03	-0.38
GRMZM2G132227	ID_300	5	0	-0.78	-1.88	1.4
GRMZM2G413422	ID_303	5	0	-1.02	-1.81	0.44
GRMZM2G042364	ID_307	5	0	-2.15	-2.6	0.3
GRMZM2G028325	ID_312	5	0	-1.84	-2.12	-0.18
GRMZM2G102183	ID_313	5	0	-0.94	-1.07	-0.13
GRMZM2G701109	ID_315	5	0	-2.05	-2.02	0.72
GRMZM2G020523	ID_320	5	0	-1.42	-1.73	0.41
GRMZM2G102737	ID_323	5	0	-1	-1.82	0.9
GRMZM2G388587	ID_353	5	0	-0.96	-1.14	0.08
GRMZM2G140116	ID_450	5	0	-185	-245.37	-72.77
GRMZM2G026216	ID_451	5	0	-138.53	-161.75	-46.31
GRMZM2G455828	ID_452	5	0	-140.24	-166.82	-33.77
GRMZM2G075630	ID_455	5	0	-48.44	-70.11	-0.43
GRMZM2G060373	ID_465	5	0	-21.67	-33.45	4.29
GRMZM2G072729	ID_470	5	0	-40.65	-40.34	-13.56
GRMZM2G040369	ID_473	5	0	-29.62	-39.7	5.34
AC233872.1_FG003	ID_474	5	0	-29.94	-38.69	-1.14
GRMZM2G145758	ID_479	5	0	-26.83	-37.45	-7.43
GRMZM2G023194	ID_491	5	0	-12.45	-19.56	-0.73
GRMZM2G095851	ID_498	5	0	-15.24	-20.53	2.72
GRMZM2G531230	ID_520	5	0	-10.31	-13.49	4.32
GRMZM5G883632	ID_537	5	0	-5.72	-9.81	-1.52
GRMZM2G031326	ID_539	5	0	-5.63	-6.44	-2.8
GRMZM5G878558	ID_609	5	0	-0.87	-1.46	-0.23
GRMZM2G119705	ID_674	5	0	-2.5	-2.57	-1.2
GRMZM2G381071	ID_897	5	0	-32.89	-32.47	-13.49
GRMZM2G074672	ID_905	5	0	-20.51	-23.55	-10.4
GRMZM2G428096	ID_913	5	0	-6.07	-7.19	-0.41
GRMZM2G048377	ID_920	5	0	-3.59	-5.31	0.12
GRMZM2G085295	ID_923	5	0	-4.38	-3.9	0.2
GRMZM2G072861	ID_928	5	0	-5.13	-6.76	-1.27
GRMZM2G358540	ID_940	5	0	-6.54	-6.69	4.82
GRMZM2G442057	ID_945	5	0	-2.33	-2.05	1.66
GRMZM5G820122	ID_946	5	0	-1.38	-1.98	-0.34
GRMZM2G004087	ID_964	5	0	-1.98	-1.9	0.84
GRMZM2G128922	ID_969	5	0	-2.82	-3.99	2.5
GRMZM2G053588	ID_982	5	0	-0.96	-1.74	0.44
GRMZM2G443447	ID_987	5	0	-1.14	-1.04	0.46
GRMZM2G001850	ID_1068	5	0	-47.34	-24.41	7
GRMZM2G013750	ID_1086	5	0	-6.96	-13.61	0.27
GRMZM2G124576	ID_1097	5	0	-13.89	-11.26	-2.66
AC155622.2_FG004	ID_1194	5	0	-3.13	-3.14	-0.6
AC197545.3_FG002	ID_1204	5	0	-3.48	-4.5	-0.63
GRMZM2G012932	ID_1236	5	0	-1.06	-0.75	-0.34
GRMZM2G000177	ID_1237	5	0	-0.83	-1.65	0.62
GRMZM2G451443	ID_1273	5	0	-1.28	-1.48	-0.58
GRMZM5G800014	ID_1369	5	0	-5.05	-6.47	2.19
AC217050.4_FG006	ID_1379	5	0	-142.09	-104.67	-6.58
GRMZM2G430807	ID_1387	5	0	-55.8	-53.01	20.23
GRMZM2G162329	ID_1396	5	0	-4.69	-8.95	4.28
GRMZM2G176737	ID_1400	5	0	-3.1	-5.95	-0.51
GRMZM2G165192	ID_1401	5	0	-3.37	-6.04	2.47
GRMZM2G367668	ID_1410	5	0	-4.51	-4.47	-1.77
GRMZM2G174699	ID_1413	5	0	-4.47	-4.03	-2.05
GRMZM2G131177	ID_1419	5	0	-1.22	-1.36	-0.64
GRMZM2G064091	ID_1420	5	0	-0.97	-1.16	-0.32
GRMZM2G030293	ID_1423	5	0	-50.98	-46.82	55.62
GRMZM2G063340	ID_1424	5	0	-53.66	-47.29	23.23
GRMZM2G163939	ID_1536	5	0	-583.22	-446.21	-190.52
GRMZM2G099352	ID_1545	5	0	-73.12	-46.95	2.19
GRMZM5G805627	ID_1553	5	0	-27.94	-28.5	3.56
GRMZM2G125452	ID_1570	5	0	-12.49	-13.26	4.04
GRMZM2G078174	ID_1573	5	0	-10	-8.87	3.23
GRMZM2G059964	ID_1574	5	0	-22.13	-33.9	2.9
GRMZM2G000710	ID_1576	5	0	-9.18	-7.14	0.74
GRMZM2G016928	ID_1584	5	0	-16.28	-16.22	-8.01
GRMZM2G060856	ID_1587	5	0	-18.14	-11.4	-7.56
GRMZM2G052105	ID_1589	5	0	-22.64	-16.06	-0.41
GRMZM2G154890	ID_1599	5	0	-10.91	-6.75	-1.51
GRMZM2G083745	ID_1608	5	0	-4.37	-5.08	-0.52
GRMZM2G036991	ID_1609	5	0	-9.01	-12.84	-2.84
GRMZM2G369991	ID_1622	5	0	-9.11	-6.59	2.29
GRMZM2G035314	ID_1643	5	0	-1.9	-1.36	0.58
GRMZM2G416791	ID_1654	5	0	-1.86	-4.01	0.6
GRMZM2G084062	ID_1668	5	0	-2.93	-3.01	0.58
GRMZM2G010657	ID_1692	5	0	-1.91	-2.84	-0.53
AC231747.1_FG001	ID_1702	5	0	-1.05	-2.04	0.29
GRMZM2G345717	ID_1787	5	0	-4.58	-2.62	0.15
GRMZM2G368827	ID_1795	5	0	-16.35	-15.81	-2.98
GRMZM2G356142	ID_1798	5	0	-9.23	-12.56	5.5
GRMZM2G132238	ID_1799	5	0	-19.11	-20.78	8.69
GRMZM2G176595	ID_1805	5	0	-12.2	-11.65	-0.81
GRMZM2G125300	ID_1818	5	0	-64.64	-52.59	-27.67
GRMZM2G110997	ID_1868	5	0	-13.21	-21.83	8.77
GRMZM2G421795	ID_1883	5	0	-0.99	-1.01	0.84
AC216353.2_FG005	ID_0	4	0	-1443.66	-1397.6	-1078.15
GRMZM2G146246	ID_3	4	0	-109.48	-147.98	-113.49
GRMZM2G148536	ID_11	4	0	-120	-80.03	-64.65
GRMZM2G463913	ID_18	4	0	-121.64	-121.11	-126.79
GRMZM2G058057	ID_31	4	0	-18.36	-13.78	-8.93
GRMZM2G010348	ID_36	4	0	-39.05	-44.36	-39.61
GRMZM2G079668	ID_48	4	0	-37.71	-46.31	-41.42
GRMZM2G107336	ID_62	4	0	-7.79	-6.49	-6.99
GRMZM5G861451	ID_84	4	0	-9.85	-11.52	-7.68
GRMZM2G173649	ID_92	4	0	-5.59	-4.5	-6.35
GRMZM2G143392	ID_108	4	0	-11.39	-15.63	-12.32
GRMZM2G014099	ID_189	4	0	-5.28	-7.28	-5.32
GRMZM2G411764	ID_413	4	0	-131.06	-175.03	-125.71
GRMZM2G171466	ID_874	4	0	-54.2	-73.19	-69.97
GRMZM2G157517	ID_1122	4	0	-11.26	-12.97	-11.71
GRMZM2G055151	ID_1166	4	0	-5.13	-5.97	-4.34
GRMZM2G470914	ID_1178	4	0	-1.51	-1.89	-1.93
GRMZM2G093574	ID_1364	4	0	-47.32	-35.19	-30.24
GRMZM2G130207	ID_1381	4	0	-100.79	-97.96	-59.53
GRMZM2G313101	ID_1394	4	0	-34.96	-35.94	-35.13
GRMZM2G067315	ID_1408	4	0	-7.95	-8.45	-6.75
GRMZM2G125314	ID_1414	4	0	-4.05	-3.94	-2.45
GRMZM2G415007	ID_1431	4	0	-21.62	-25.02	-16.04
GRMZM2G101116	ID_1474	4	0	-4.22	-4.2	-3.35
GRMZM2G058250	ID_1541	4	0	-151.1	-165.63	-173.64
GRMZM2G468932	ID_1556	4	0	-59.38	-61.89	-36.51
GRMZM2G153648	ID_1561	4	0	-58.46	-53.96	-50.56
GRMZM2G164868	ID_1565	4	0	-32.35	-27.23	-24.15
GRMZM2G028393	ID_1582	4	0	-52.71	-56.82	-56.44
GRMZM5G897976	ID_1583	4	0	-16.42	-14.68	-9.13
GRMZM2G070807	ID_1595	4	0	-9.49	-6.34	-6.23
GRMZM2G048497	ID_1632	4	0	-4.14	-3.69	-2.54
GRMZM2G128358	ID_1638	4	0	-5.33	-5.78	-7.34
GRMZM2G159554	ID_1680	4	0	-3.04	-1.41	-1.99
GRMZM2G476762	ID_1688	4	0	-9.28	-9.28	-8.14
GRMZM2G438755	ID_1696	4	0	-2.64	-3.11	-3.67
AC197699.3_FG003	ID_1706	4	0	-2.75	-3.36	-3.65
GRMZM2G136389	ID_1708	4	0	-3.12	-2.29	-1.58
GRMZM2G023152	ID_1717	4	0	-4.44	-4.17	-3.78
GRMZM2G025105	ID_1727	4	0	-2.82	-2.6	-3.05
GRMZM2G043878	ID_1735	4	0	-2.22	-2.48	-2.48
GRMZM2G337706	ID_1762	4	0	-1.02	-0.93	-0.73
AC199315.4_FG001	ID_1866	4	0	-39.95	-43.11	-50.52
GRMZM2G589470	ID_54	3	0	-18.46	-9.98	-28.15
GRMZM2G019538	ID_65	3	0	-3.71	-3.67	-6.2
GRMZM5G801031	ID_66	3	0	-8.32	-5.28	-14.32
GRMZM2G011624	ID_73	3	0	-9.53	-5.19	-17.31
GRMZM2G051738	ID_174	3	0	-2.17	-2.57	-3.4
GRMZM2G131715	ID_306	3	0	-0.74	-0.59	-1.48
GRMZM2G052100	ID_735	3	0	-0.87	-0.78	-1.67
AC203909.3_FG006	ID_1516	3	0	-0.85	-0.59	-2.57
GRMZM2G150791	ID_1577	3	0	-16.51	-15.23	-24.36
GRMZM2G143788	ID_1594	3	0	-11.51	-6.14	-19.88
GRMZM2G122337	ID_10	1	0	-63.05	-216.29	-208.76
GRMZM2G042492	ID_15	1	0	-116.53	-185.56	-153.78
GRMZM2G119471	ID_20	1	0	-81.19	-122.74	-108.89
GRMZM2G179703	ID_23	1	0	-26.41	-69.66	-51.32
GRMZM2G156816	ID_27	1	0	-22.87	-44.21	-41.82
GRMZM2G419806	ID_40	1	0	-33.37	-60.06	-56.16
GRMZM2G111998	ID_104	1	0	-4.88	-13.59	-10.48
GRMZM2G100336	ID_122	1	0	-3.28	-7.74	-8.95
GRMZM2G469224	ID_238	1	0	-1.66	-2.49	-2.94
GRMZM2G338160	ID_433	1	0	-2.89	-4.69	-4.78
GRMZM2G176998	ID_475	1	0	-12.27	-31.04	-30.13
GRMZM2G033544	ID_663	1	0	-1.21	-3.15	-3.4
GRMZM2G360021	ID_865	1	0	-69.14	-103.59	-88.8
GRMZM2G106061	ID_868	1	0	-56.14	-84.24	-71.65
GRMZM2G098520	ID_878	1	0	-16.75	-61.74	-52.11
GRMZM2G113033	ID_882	1	0	-21.01	-53.62	-50.3
GRMZM2G140996	ID_887	1	0	-11.46	-23.81	-22.21
GRMZM2G039586	ID_890	1	0	-21.59	-32.33	-31.18
GRMZM2G181258	ID_896	1	0	-7.36	-23.11	-22.87
GRMZM2G025171	ID_899	1	0	-10.32	-21.4	-21.52
GRMZM2G013798	ID_916	1	0	-3.99	-6.29	-5.44
GRMZM2G038833	ID_1063	1	0	-119.41	-185.56	-175.36
GRMZM2G025855	ID_1076	1	0	-45.48	-66.74	-58.23
AC234157.1_FG002	ID_1078	1	0	-34.73	-62.98	-53.5
GRMZM5G826801	ID_1084	1	0	-29.82	-50.41	-50.66
GRMZM2G032721	ID_1088	1	0	-26.81	-37.95	-37.4
GRMZM2G099463	ID_1089	1	0	-17.3	-25.99	-30.16
GRMZM2G407996	ID_1092	1	0	-27.14	-43.6	-34.04
GRMZM5G862107	ID_1096	1	0	-16.12	-31.98	-28.25
GRMZM2G117281	ID_1101	1	0	-9.6	-21.62	-23.18
GRMZM2G077222	ID_1108	1	0	-9.23	-21.16	-16.3
GRMZM5G851051	ID_1124	1	0	-7.72	-22.92	-19.84
GRMZM2G117412	ID_1148	1	0	-4.03	-10.8	-11.48
GRMZM2G318635	ID_1165	1	0	-3.25	-7.59	-7.91
GRMZM2G122324	ID_1208	1	0	-2.26	-5.5	-5.1
GRMZM2G010091	ID_1304	1	0	-0.9	-1.25	-1.37
GRMZM2G060481	ID_1372	1	0	-2.61	-3.71	-3.51
GRMZM2G377168	ID_1380	1	0	-90.21	-204.73	-215.66
GRMZM2G154523	ID_1392	1	0	-17.89	-26.06	-32.98
GRMZM2G334181	ID_1407	1	0	-3.24	-5.56	-6
GRMZM2G010801	ID_1513	1	0	-11.84	-17.21	-16.83
GRMZM2G496319	ID_1540	1	0	-72.94	-167.56	-169.68
GRMZM2G145962	ID_1567	1	0	-30.68	-49.71	-40.8
GRMZM2G145496	ID_1579	1	0	-13.71	-22.69	-18.05
GRMZM5G806622	ID_1590	1	0	-12.43	-18.5	-17.99
GRMZM2G134389	ID_1596	1	0	-7.02	-22.66	-20.39
GRMZM2G062470	ID_1625	1	0	-6.01	-8.7	-9.19
GRMZM2G080355	ID_1678	1	0	-1.57	-5.32	-3.92
GRMZM2G161696	ID_1736	1	0	-0.82	-1.14	-1.1
GRMZM2G361164	ID_1748	1	0	-0.76	-1.94	-1.94
GRMZM2G110567	ID_1819	1	0	-8.33	-28.95	-31.43
GRMZM2G084958	ID_1	0	0	-244.59	-720.62	-1123.13
GRMZM2G105644	ID_24	0	0	-24.82	-68.18	-119.04
GRMZM2G337113	ID_39	0	0	-15.7	-59.29	-80.01
GRMZM5G837822	ID_252	0	0	-0.34	-0.67	-1.2
GRMZM2G007729	ID_694	0	0	-0.56	-0.87	-1.66
GRMZM2G377855	ID_860	0	0	-49.8	-132.69	-164.96
GRMZM2G016677	ID_863	0	0	-22.6	-92.04	-122.15
GRMZM2G085646	ID_867	0	0	-26.52	-93.15	-111.9
GRMZM2G015024	ID_883	0	0	-5.78	-7.97	-13.03
GRMZM2G323024	ID_904	0	0	-3.59	-8.25	-15.9
GRMZM2G102356	ID_1065	0	0	-21.16	-106.67	-148.48
GRMZM2G138338	ID_1114	0	0	-2.15	-6.86	-8.64
GRMZM2G123719	ID_1173	0	0	-2	-5.33	-8
GRMZM2G141214	ID_1366	0	0	-5.47	-10.53	-12.95
GRMZM2G463640	ID_1368	0	0	-4.14	-6	-9.41
GRMZM2G700208	ID_1370	0	0	-1.49	-3.5	-4.44
GRMZM2G334740	ID_1530	0	0	-1	-1.49	-2.68
GRMZM2G177098	ID_1546	0	0	-42.33	-79.72	-104
GRMZM2G119691	ID_1626	0	0	-2.8	-5.66	-8.81
GRMZM2G026804	ID_1719	0	0	-1.18	-2.58	-3.44

## Sheet: SHZ4-NIL
Gene ID	SPOT	Profile	S3496	S5496	S6496	S7496
GRMZM2G142097	ID_2	4	0	-316.16	-317.94	-408.54
GRMZM2G042492	ID_15	4	0	-238.71	-227.46	-275.44
GRMZM2G463913	ID_18	4	0	-236.09	-198.64	-243.53
GRMZM2G119471	ID_20	4	0	-149.06	-125.77	-179.61
GRMZM2G010196	ID_33	4	0	-86.82	-71.03	-96.12
GRMZM2G419806	ID_40	4	0	-48.54	-44.74	-59.48
GRMZM2G039988	ID_41	4	0	-81.03	-66.49	-58.14
GRMZM2G022931	ID_44	4	0	-40.31	-51.07	-54.46
GRMZM2G079668	ID_48	4	0	-47.13	-39.1	-50.95
GRMZM2G169372	ID_75	4	0	-37.14	-32.22	-36.78
GRMZM2G019404	ID_82	4	0	-15.37	-17.76	-15.2
GRMZM2G315375	ID_91	4	0	-12.59	-8.33	-14.16
GRMZM2G111998	ID_104	4	0	-16.86	-19.79	-21.27
GRMZM2G050108	ID_107	4	0	-19.5	-20.19	-17.79
GRMZM2G143392	ID_108	4	0	-19.8	-17.58	-20.1
GRMZM2G156296	ID_112	4	0	-6.76	-6.5	-8.84
GRMZM2G110027	ID_114	4	0	-10.66	-8.96	-8.63
GRMZM2G110195	ID_117	4	0	-12.87	-14.82	-12.42
GRMZM2G126781	ID_127	4	0	-12.36	-12.39	-14.3
GRMZM2G010491	ID_130	4	0	-7.44	-7.45	-4.96
GRMZM2G324956	ID_143	4	0	-7.5	-7.36	-7.01
GRMZM2G054120	ID_168	4	0	-4.88	-6.47	-5.77
GRMZM2G000964	ID_178	4	0	-6.13	-4.22	-5.24
GRMZM2G327890	ID_179	4	0	-14.83	-14.85	-14.89
GRMZM2G102845	ID_182	4	0	-2.4	-1.26	-1.88
GRMZM2G173718	ID_184	4	0	-4.73	-5.56	-4.03
GRMZM2G123489	ID_188	4	0	-7.26	-7.04	-9.03
GRMZM2G014099	ID_189	4	0	-9.51	-8.88	-9.73
GRMZM2G114503	ID_195	4	0	-3.57	-2.98	-3.59
GRMZM2G022958	ID_198	4	0	-3.27	-3.13	-3.88
GRMZM2G050514	ID_212	4	0	-4.43	-4.84	-4.17
GRMZM2G170742	ID_215	4	0	-3.46	-2.73	-1.8
GRMZM2G399207	ID_217	4	0	-2.89	-1.53	-2.04
GRMZM2G119783	ID_239	4	0	-3.62	-3.93	-4.05
GRMZM2G155077	ID_248	4	0	-2.59	-3.23	-3.72
GRMZM2G043932	ID_254	4	0	-3.17	-2.98	-3.95
GRMZM2G358827	ID_265	4	0	-1.49	-1.12	-1.7
GRMZM2G030444	ID_267	4	0	-5.46	-5.37	-4.46
GRMZM2G366142	ID_270	4	0	-3.54	-4.31	-4.51
GRMZM2G387528	ID_271	4	0	-2.07	-1.92	-2.75
GRMZM2G139193	ID_272	4	0	-3.87	-4.22	-5.32
GRMZM2G023715	ID_275	4	0	-1.72	-1.95	-2.27
GRMZM2G160862	ID_282	4	0	-3.02	-3.13	-3.5
GRMZM2G172586	ID_283	4	0	-2.85	-1.89	-3.04
AC234165.1_FG002	ID_290	4	0	-3	-2.79	-3.21
GRMZM2G128923	ID_299	4	0	-2.36	-1.88	-1.69
GRMZM2G568636	ID_304	4	0	-3.07	-2.81	-2.99
GRMZM2G055684	ID_309	4	0	-1.91	-2.29	-2.5
GRMZM2G028325	ID_312	4	0	-1.54	-1.48	-1.78
GRMZM2G112057	ID_314	4	0	-2.25	-2.56	-2.43
GRMZM2G700192	ID_319	4	0	-1.05	-0.68	-1.07
GRMZM2G020523	ID_320	4	0	-2.01	-1.62	-1.93
GRMZM2G102737	ID_323	4	0	-1.74	-1.74	-1.99
GRMZM2G439049	ID_328	4	0	-1.75	-1.03	-1.89
GRMZM2G100754	ID_333	4	0	-1.12	-0.98	-1.26
GRMZM2G024708	ID_338	4	0	-1.34	-1.06	-1.61
GRMZM2G316665	ID_344	4	0	-1.4	-1.5	-1.6
GRMZM2G396541	ID_352	4	0	-0.75	-0.83	-1.08
GRMZM2G458728	ID_356	4	0	-1.52	-1.51	-1.62
GRMZM2G458581	ID_359	4	0	-0.95	-0.97	-1.1
GRMZM2G094352	ID_362	4	0	-0.79	-0.83	-1.02
GRMZM2G420743	ID_373	4	0	-0.92	-0.95	-1.02
GRMZM2G140915	ID_438	4	0	-1.27	-1.57	-1.62
GRMZM2G140116	ID_450	4	0	-185.79	-113.88	-99.7
GRMZM2G455828	ID_452	4	0	-131.2	-112.79	-109.19
GRMZM2G109448	ID_460	4	0	-14.27	-14.64	-9.47
GRMZM2G011253	ID_466	4	0	-40.36	-33.81	-21.26
GRMZM2G105712	ID_472	4	0	-44.87	-31.52	-32.9
GRMZM2G366392	ID_499	4	0	-21.31	-21.16	-12.74
GRMZM2G027825	ID_507	4	0	-12.04	-10.53	-13.18
GRMZM5G876379	ID_574	4	0	-2.96	-1.93	-2.49
GRMZM2G105466	ID_581	4	0	-7.24	-7.96	-8.47
GRMZM2G006977	ID_584	4	0	-2.14	-1.46	-2.2
GRMZM2G409128	ID_610	4	0	-4.65	-5.61	-5.22
GRMZM2G040803	ID_630	4	0	-2.21	-2.75	-3.14
GRMZM2G030305	ID_642	4	0	-4.46	-3.17	-4.91
GRMZM5G801949	ID_659	4	0	-1.78	-2.12	-2.58
GRMZM2G033544	ID_663	4	0	-4.66	-5.46	-5.17
GRMZM2G041809	ID_666	4	0	-2.65	-3.21	-3.57
GRMZM2G102923	ID_693	4	0	-1.78	-2.17	-2.16
GRMZM2G443728	ID_733	4	0	-1.81	-1.96	-1.26
GRMZM2G052100	ID_735	4	0	-1.36	-1.69	-1.48
GRMZM2G086841	ID_737	4	0	-3.56	-3.9	-4.4
GRMZM2G142779	ID_739	4	0	-1	-0.85	-1.14
GRMZM2G093776	ID_743	4	0	-1.19	-1.43	-0.97
GRMZM2G366910	ID_749	4	0	-3.18	-4.13	-3.78
GRMZM5G883250	ID_798	4	0	-1.03	-1.33	-1
GRMZM2G138396	ID_806	4	0	-0.83	-1.02	-1.02
GRMZM2G132958	ID_809	4	0	-0.84	-1.03	-0.91
GRMZM5G819464	ID_811	4	0	-1.27	-1.45	-1.21
GRMZM2G010702	ID_817	4	0	-1.37	-1.51	-1.51
GRMZM2G162396	ID_828	4	0	-0.77	-1.11	-0.89
GRMZM2G130173	ID_858	4	0	-272.26	-285.8	-152.03
GRMZM2G384780	ID_861	4	0	-270.06	-225.56	-259.33
GRMZM2G402417	ID_864	4	0	-69.77	-78.49	-62.71
GRMZM2G360021	ID_865	4	0	-112.1	-89.84	-121.24
GRMZM2G085646	ID_867	4	0	-106.37	-102.17	-139.57
GRMZM2G106061	ID_868	4	0	-90.96	-74.5	-90.37
AC202185.4_FG004	ID_872	4	0	-88.2	-82.79	-81.66
GRMZM2G098239	ID_873	4	0	-89.4	-102.48	-117.25
GRMZM2G171466	ID_874	4	0	-87.34	-86.83	-97.98
GRMZM2G001241	ID_875	4	0	-67.18	-42.39	-70.51
GRMZM2G010868	ID_877	4	0	-76.47	-80.28	-82.89
GRMZM2G098520	ID_878	4	0	-46.33	-45.17	-52.6
AC215201.3_FG005	ID_880	4	0	-49.05	-39.58	-44.59
GRMZM2G009465	ID_881	4	0	-95.68	-95.19	-95.81
GRMZM2G113033	ID_882	4	0	-61.44	-62.76	-69.09
GRMZM2G140996	ID_887	4	0	-39.12	-30.24	-38.54
GRMZM2G096247	ID_888	4	0	-48.19	-42.81	-34.85
GRMZM2G039586	ID_890	4	0	-33.32	-30.88	-35.87
GRMZM2G017991	ID_891	4	0	-54.69	-45.29	-47.21
GRMZM2G147849	ID_892	4	0	-22.22	-22.55	-26.09
GRMZM2G066191	ID_895	4	0	-41.87	-42.04	-41.85
GRMZM2G181258	ID_896	4	0	-21.56	-20.38	-28.78
GRMZM2G381071	ID_897	4	0	-29.33	-27.3	-27.56
GRMZM2G154628	ID_898	4	0	-29.73	-21.95	-28.93
GRMZM2G025171	ID_899	4	0	-22.98	-21.45	-29.15
GRMZM2G109814	ID_900	4	0	-27.75	-30.25	-23.18
GRMZM2G154211	ID_901	4	0	-19.86	-13.83	-19.93
GRMZM2G133698	ID_903	4	0	-26.64	-15	-21.63
GRMZM2G074672	ID_905	4	0	-28.05	-27.28	-26.42
GRMZM2G461716	ID_906	4	0	-16.96	-14.01	-20.97
GRMZM2G035503	ID_908	4	0	-18.49	-16.14	-18.48
GRMZM2G136236	ID_910	4	0	-11.54	-7.9	-10.63
GRMZM2G005552	ID_914	4	0	-12.19	-9.27	-9.97
GRMZM2G339866	ID_915	4	0	-12.35	-10.73	-13.35
GRMZM2G036861	ID_918	4	0	-15.42	-16.57	-17
GRMZM2G414159	ID_919	4	0	-12.66	-9.93	-11.4
AC234203.1_FG004	ID_921	4	0	-8.24	-6.17	-9.28
GRMZM2G052562	ID_922	4	0	-14.22	-13.99	-15
GRMZM2G044947	ID_926	4	0	-12.35	-7.84	-12.4
GRMZM2G175952	ID_927	4	0	-8.45	-7.52	-8.6
GRMZM2G146130	ID_930	4	0	-7.47	-7.15	-7.85
GRMZM2G127134	ID_934	4	0	-1.74	-2.23	-1.76
GRMZM2G339645	ID_936	4	0	-7.3	-5.04	-6.47
GRMZM2G012176	ID_938	4	0	-6.16	-6.78	-7.27
GRMZM2G480850	ID_939	4	0	-13.93	-13.06	-14.37
GRMZM2G358540	ID_940	4	0	-5	-4.55	-5.01
GRMZM2G108023	ID_941	4	0	-4.51	-4.45	-4.94
GRMZM2G434557	ID_947	4	0	-1.84	-2.23	-2.27
GRMZM2G314660	ID_948	4	0	-9.69	-7.98	-9.77
GRMZM2G061230	ID_949	4	0	-12.98	-11.97	-12.88
GRMZM2G137352	ID_950	4	0	-6.42	-5.78	-5.9
GRMZM2G333923	ID_953	4	0	-8.5	-7.9	-8.16
GRMZM2G058472	ID_954	4	0	-3.48	-3.67	-3.71
GRMZM2G404676	ID_955	4	0	-5.87	-6.73	-6.77
GRMZM2G126763	ID_958	4	0	-6.96	-5.02	-6.98
GRMZM2G075295	ID_967	4	0	-8.95	-8.67	-9.39
GRMZM2G128922	ID_969	4	0	-3.37	-2.65	-3.1
GRMZM2G099967	ID_970	4	0	-4.94	-5.31	-5.18
GRMZM2G125241	ID_971	4	0	-3.08	-2.56	-3.32
GRMZM2G089056	ID_977	4	0	-3.38	-2.01	-3.42
GRMZM2G081583	ID_985	4	0	-2.88	-2.61	-3.05
GRMZM2G027385	ID_991	4	0	-2.65	-2.42	-2.69
GRMZM2G106748	ID_992	4	0	-2.35	-2.62	-2.89
GRMZM2G171781	ID_995	4	0	-2.75	-2.77	-2.56
GRMZM2G003909	ID_996	4	0	-3.07	-2.53	-3
GRMZM2G123122	ID_999	4	0	-1.47	-1.62	-1.47
GRMZM2G150841	ID_1007	4	0	-2.36	-2.05	-2.37
GRMZM2G110145	ID_1012	4	0	-34.01	-27.35	-29.33
GRMZM2G412207	ID_1015	4	0	-9.44	-8.31	-5.34
GRMZM2G074792	ID_1017	4	0	-20.39	-26.39	-22.14
GRMZM2G567897	ID_1021	4	0	-3.99	-5.05	-4.19
GRMZM2G035103	ID_1023	4	0	-10.92	-14.02	-14.12
GRMZM2G400714	ID_1025	4	0	-4.74	-6.6	-5.93
GRMZM2G348956	ID_1030	4	0	-1.18	-0.81	-1.1
GRMZM2G081603	ID_1031	4	0	-4.58	-3.37	-4.3
GRMZM2G120320	ID_1036	4	0	-3.19	-2.91	-2.73
GRMZM2G012724	ID_1038	4	0	-3.19	-3.11	-2.76
GRMZM2G082959	ID_1040	4	0	-1.39	-2	-1.7
GRMZM2G066428	ID_1041	4	0	-1.62	-1.29	-1.31
GRMZM2G344388	ID_1042	4	0	-2.57	-1.82	-2.24
GRMZM2G164405	ID_1047	4	0	-0.98	-1.09	-1.07
GRMZM2G063756	ID_1061	4	0	-114.74	-105.92	-143.18
GRMZM2G038833	ID_1063	4	0	-170.94	-158.68	-186.06
GRMZM2G025855	ID_1076	4	0	-72.11	-58.46	-69.88
GRMZM2G047720	ID_1077	4	0	-72.88	-63.48	-88.49
AC234157.1_FG002	ID_1078	4	0	-71.59	-47.47	-64.06
GRMZM2G116632	ID_1080	4	0	-55.21	-38.04	-55.63
GRMZM2G001514	ID_1083	4	0	-26.31	-16.3	-18.22
GRMZM5G826801	ID_1084	4	0	-55.21	-44.87	-51.34
GRMZM2G032721	ID_1088	4	0	-51.56	-39.29	-41.93
GRMZM2G407996	ID_1092	4	0	-42.75	-35.41	-41.71
GRMZM5G862107	ID_1096	4	0	-34.33	-29.5	-36
GRMZM2G117281	ID_1101	4	0	-21.16	-18.58	-16.47
GRMZM2G008247	ID_1105	4	0	-25.29	-26.09	-25.48
GRMZM2G168304	ID_1110	4	0	-38.2	-36.3	-38.82
GRMZM2G144155	ID_1111	4	0	-24.87	-24.2	-25.77
GRMZM2G138338	ID_1114	4	0	-19.43	-11.02	-18.19
GRMZM2G309847	ID_1116	4	0	-32.46	-28.19	-28.89
GRMZM2G016649	ID_1123	4	0	-18.29	-13.5	-16.55
GRMZM5G851051	ID_1124	4	0	-23.29	-23.65	-25.87
GRMZM2G036217	ID_1125	4	0	-25.1	-23.02	-24.38
GRMZM2G059693	ID_1126	4	0	-31.2	-33.01	-30.82
GRMZM2G163200	ID_1129	4	0	-14.45	-10.86	-9.28
GRMZM2G029101	ID_1131	4	0	-14.36	-8.3	-11.11
GRMZM2G131912	ID_1135	4	0	-7.21	-4.48	-5.26
GRMZM2G076468	ID_1136	4	0	-17.49	-13.17	-17.1
GRMZM2G006894	ID_1138	4	0	-7.05	-4.28	-6.43
GRMZM2G061969	ID_1139	4	0	-6.81	-5.4	-7.61
GRMZM2G117412	ID_1148	4	0	-10.79	-11.03	-10.57
GRMZM2G101613	ID_1149	4	0	-10.61	-7.01	-8.06
GRMZM2G079123	ID_1151	4	0	-8.5	-6.97	-7.7
GRMZM2G029029	ID_1154	4	0	-10.82	-8.77	-7.76
GRMZM2G030009	ID_1158	4	0	-11.1	-5.95	-8.48
GRMZM2G076946	ID_1160	4	0	-11.56	-9.72	-8.84
GRMZM2G160585	ID_1164	4	0	-4.15	-3.24	-3.96
GRMZM2G318635	ID_1165	4	0	-9.27	-7.61	-9.38
GRMZM2G123719	ID_1173	4	0	-7.52	-6.99	-8.65
AC199765.4_FG008	ID_1177	4	0	-5.21	-5.47	-4.92
GRMZM2G079616	ID_1184	4	0	-12.63	-10.53	-12.46
AC233922.1_FG008	ID_1186	4	0	-4	-2.28	-3.01
GRMZM2G037284	ID_1187	4	0	-13.86	-12.03	-12.52
GRMZM2G046601	ID_1190	4	0	-5.84	-5.84	-3.23
GRMZM5G859526	ID_1191	4	0	-7.72	-5.3	-8.12
GRMZM2G077015	ID_1195	4	0	-6.04	-5.29	-4.57
GRMZM2G074267	ID_1196	4	0	-6.58	-4.57	-5.17
GRMZM2G010960	ID_1203	4	0	-3.72	-2.1	-2.71
GRMZM2G443495	ID_1206	4	0	-8.32	-7.28	-8.6
GRMZM2G122324	ID_1208	4	0	-7.97	-6.42	-7.58
GRMZM2G169967	ID_1211	4	0	-6.68	-4.87	-4.79
GRMZM2G020799	ID_1212	4	0	-2.23	-1.04	-1.41
AC199068.2_FG017	ID_1213	4	0	-6.23	-6.11	-6.48
GRMZM2G179279	ID_1215	4	0	-5.13	-5.34	-5.93
GRMZM2G137673	ID_1217	4	0	-3.98	-3.7	-2.55
GRMZM2G047129	ID_1225	4	0	-4.99	-2.82	-4.42
GRMZM2G413113	ID_1227	4	0	-6.5	-4.58	-6.12
GRMZM2G056750	ID_1230	4	0	-3.77	-1.99	-3.4
GRMZM2G077206	ID_1240	4	0	-1.87	-1.69	-2.23
GRMZM2G057733	ID_1243	4	0	-3.66	-3.59	-3.68
GRMZM2G108615	ID_1247	4	0	-5.47	-3.44	-3.57
GRMZM2G169458	ID_1252	4	0	-5.44	-4.66	-5.29
GRMZM2G370193	ID_1260	4	0	-2.99	-2.8	-1.69
GRMZM2G082376	ID_1261	4	0	-2.95	-2.78	-3.05
GRMZM2G147698	ID_1262	4	0	-2.77	-2	-2.54
GRMZM2G043663	ID_1266	4	0	-2.84	-2.55	-2.85
GRMZM2G049695	ID_1271	4	0	-1.77	-1	-1.85
GRMZM2G111926	ID_1274	4	0	-4.21	-4.65	-3.71
GRMZM2G084806	ID_1276	4	0	-2.6	-1.93	-1.91
GRMZM2G030325	ID_1277	4	0	-2.07	-1.3	-1.62
GRMZM2G085678	ID_1282	4	0	-4.28	-3.67	-3.86
GRMZM2G113203	ID_1286	4	0	-1.79	-1.16	-1.58
GRMZM2G146878	ID_1289	4	0	-2.06	-1.65	-2.11
GRMZM2G123446	ID_1291	4	0	-1.58	-1.02	-1.27
GRMZM2G178136	ID_1294	4	0	-1.77	-1.55	-1.88
GRMZM2G016558	ID_1296	4	0	-1.35	-1.59	-1.17
GRMZM2G057086	ID_1303	4	0	-2.52	-2.17	-2.37
GRMZM2G010091	ID_1304	4	0	-1.43	-1.08	-1.39
GRMZM2G461671	ID_1313	4	0	-1.76	-1.47	-1.87
GRMZM2G477340	ID_1325	4	0	-1.67	-1.48	-1.57
GRMZM2G094304	ID_1327	4	0	-1.19	-1.35	-1.36
GRMZM2G341058	ID_1330	4	0	-1.3	-1.08	-1.24
GRMZM2G069325	ID_1336	4	0	-1.31	-1.31	-1.31
GRMZM2G070304	ID_1342	4	0	-1.54	-1.59	-1.63
GRMZM2G323415	ID_1346	4	0	-1.36	-1.52	-1.36
GRMZM2G114356	ID_1363	4	0	-568.22	-573.8	-614.06
GRMZM2G141214	ID_1366	4	0	-14.77	-16.88	-19.06
GRMZM5G800014	ID_1369	4	0	-7.71	-7.3	-7.23
GRMZM2G060481	ID_1372	4	0	-6.43	-6.81	-6.94
GRMZM2G354558	ID_1374	4	0	-0.97	-1.19	-1.13
GRMZM5G842058	ID_1385	4	0	-64.26	-62.49	-71.49
GRMZM2G067315	ID_1408	4	0	-3.45	-3.32	-3.38
GRMZM2G076593	ID_1412	4	0	-1.09	-0.98	-0.87
GRMZM2G013200	ID_1417	4	0	-3.09	-1.77	-2.45
GRMZM2G013630	ID_1418	4	0	-3.43	-2.1	-2.31
GRMZM2G114793	ID_1425	4	0	-89	-54.36	-75.37
GRMZM2G415007	ID_1431	4	0	-61.99	-29.65	-48.23
GRMZM2G074687	ID_1441	4	0	-28.05	-23.33	-30.56
GRMZM2G101116	ID_1474	4	0	-22.4	-20.66	-23.68
GRMZM2G034471	ID_1493	4	0	-3	-3.52	-2.13
GRMZM2G115070	ID_1500	4	0	-1.17	-1.41	-1.52
GRMZM5G854138	ID_1502	4	0	-428.07	-459.45	-304.69
GRMZM2G034152	ID_1509	4	0	-100.95	-95.63	-100.15
GRMZM2G036880	ID_1510	4	0	-25.51	-22.63	-30.93
GRMZM5G896560	ID_1511	4	0	-93.17	-71.64	-89.55
GRMZM2G114127	ID_1514	4	0	-46.29	-25.39	-27.82
GRMZM2G144420	ID_1534	4	0	-1.25	-1.25	-1.19
GRMZM2G058250	ID_1541	4	0	-114.74	-96.65	-100.79
GRMZM2G099352	ID_1545	4	0	-91.37	-91.15	-93.53
GRMZM2G177720	ID_1547	4	0	-99.26	-93.14	-129.08
GRMZM2G389768	ID_1549	4	0	-111.15	-82.26	-99.39
GRMZM5G805627	ID_1553	4	0	-56.46	-44.74	-56.78
GRMZM2G003179	ID_1560	4	0	-20.31	-24.15	-17.32
GRMZM2G145962	ID_1567	4	0	-86.94	-88.53	-101.36
GRMZM2G125452	ID_1570	4	0	-24.88	-27	-25.97
GRMZM2G150791	ID_1577	4	0	-56.92	-55.64	-66.81
GRMZM2G145496	ID_1579	4	0	-57.96	-55.17	-70.36
GRMZM2G028393	ID_1582	4	0	-13.96	-14.69	-14.7
GRMZM5G897976	ID_1583	4	0	-30.68	-29.37	-18.89
GRMZM2G016928	ID_1584	4	0	-53.75	-54.29	-53.12
GRMZM2G060856	ID_1587	4	0	-19.32	-27.13	-22.34
GRMZM2G143788	ID_1594	4	0	-38.51	-39.89	-40.97
GRMZM2G075117	ID_1624	4	0	-13	-7.19	-10.89
GRMZM2G119691	ID_1626	4	0	-20.08	-22.76	-24.13
GRMZM5G873015	ID_1637	4	0	-7.8	-8.09	-10.02
GRMZM2G128358	ID_1638	4	0	-16.07	-15.81	-15.25
GRMZM2G370081	ID_1644	4	0	-8.38	-7.08	-6.74
GRMZM5G873635	ID_1653	4	0	-8.42	-10.49	-8
GRMZM2G067910	ID_1659	4	0	-5.41	-2.34	-3.2
GRMZM2G084062	ID_1668	4	0	-6.59	-4.67	-5
GRMZM2G159554	ID_1680	4	0	-8.13	-7.41	-9.42
GRMZM2G177518	ID_1685	4	0	-8.12	-7.62	-10.85
GRMZM2G476762	ID_1688	4	0	-2.32	-2.18	-2.32
GRMZM2G457621	ID_1689	4	0	-10.75	-11.84	-12.91
GRMZM2G123373	ID_1705	4	0	-6.07	-3.82	-5.5
GRMZM2G048295	ID_1707	4	0	-6.44	-4.01	-6.88
GRMZM2G405459	ID_1714	4	0	-5.48	-6.71	-4.83
GRMZM2G159285	ID_1718	4	0	-4.85	-5.55	-4.21
GRMZM2G046952	ID_1720	4	0	-6.49	-7.86	-8.23
GRMZM2G154578	ID_1732	4	0	-9.59	-7.57	-10.76
GRMZM5G893392	ID_1742	4	0	-6.7	-6.42	-8.68
GRMZM2G419953	ID_1752	4	0	-1.91	-1.82	-2.48
GRMZM2G044247	ID_1754	4	0	-4.7	-4.51	-4.95
GRMZM2G014770	ID_1757	4	0	-2.08	-2.28	-2.58
GRMZM2G349791	ID_1759	4	0	-4.21	-5.44	-4.38
GRMZM2G351259	ID_1764	4	0	-2.71	-2.38	-2.75
GRMZM2G032602	ID_1766	4	0	-1.23	-1.06	-0.71
GRMZM2G429035	ID_1772	4	0	-1.7	-1.82	-1.51
GRMZM2G052586	ID_1775	4	0	-1.33	-0.85	-1.43
GRMZM2G068202	ID_1789	4	0	-8.13	-5.06	-7.21
GRMZM2G107839	ID_1797	4	0	-58.43	-54.84	-58.39
GRMZM2G132238	ID_1799	4	0	-7.78	-6.02	-6.52
GRMZM2G478414	ID_1802	4	0	-41.18	-37.26	-40.41
GRMZM2G176595	ID_1805	4	0	-5.76	-4.69	-5.6
GRMZM2G418343	ID_1806	4	0	-33.85	-32.83	-33.11
GRMZM2G089493	ID_1807	4	0	-24.54	-23.34	-24.46
GRMZM2G045215	ID_1808	4	0	-20.22	-20.21	-19.81
GRMZM2G424205	ID_1809	4	0	-7.46	-6.75	-7.11
GRMZM2G088919	ID_1810	4	0	-6.02	-6.33	-7.38
GRMZM2G027098	ID_1811	4	0	-7.55	-6.93	-7.32
GRMZM2G136085	ID_1842	4	0	-1.21	-1.12	-1.13
GRMZM2G036351	ID_1843	4	0	-11.56	-13.76	-13.1
GRMZM2G381404	ID_1844	4	0	-7.4	-8.6	-7.6
GRMZM2G135019	ID_1847	4	0	-8.55	-8.55	-8.27
GRMZM2G449681	ID_1875	4	0	-8.14	-10.16	-9.85
GRMZM2G369472	ID_1881	4	0	-5.89	-7.03	-7.57
GRMZM2G301089	ID_1882	4	0	-8.23	-8.26	-8.34
GRMZM2G041774	ID_1886	4	0	-4.19	-3.94	-4.66
GRMZM2G082185	ID_77	1	0	-10.69	-15.46	-18.12
GRMZM2G147659	ID_93	1	0	-8.37	-14.11	-16.91
GRMZM2G176056	ID_103	1	0	-13.6	-18.26	-20.61
GRMZM2G108537	ID_116	1	0	-3.3	-8.74	-9.67
GRMZM2G170646	ID_121	1	0	-7.43	-10.04	-10.86
GRMZM2G132303	ID_126	1	0	-6.62	-9.49	-10.12
GRMZM2G168898	ID_133	1	0	-3.88	-7.88	-7.69
GRMZM2G006765	ID_150	1	0	-6.83	-12.26	-11.55
GRMZM2G017223	ID_161	1	0	-4.24	-5.83	-5.8
GRMZM2G085392	ID_226	1	0	-4.33	-5.74	-7.18
GRMZM2G033074	ID_240	1	0	-2.21	-3.14	-3.72
GRMZM2G060659	ID_247	1	0	-1.99	-2.67	-3.36
GRMZM2G344163	ID_259	1	0	-1.34	-2.67	-2.75
GRMZM2G144051	ID_260	1	0	-3.28	-7.51	-6.93
GRMZM2G127147	ID_269	1	0	-2.84	-3.68	-4.17
GRMZM2G025459	ID_289	1	0	-0.77	-1.96	-2.27
GRMZM2G032619	ID_293	1	0	-0.9	-1.49	-1.56
GRMZM2G017319	ID_311	1	0	-1.31	-1.84	-1.85
GRMZM2G064744	ID_341	1	0	-0.91	-1.48	-1.63
GRMZM2G179792	ID_343	1	0	-0.73	-0.95	-1.2
GRMZM2G160730	ID_425	1	0	-4.36	-9.71	-9.63
GRMZM2G120938	ID_426	1	0	-8.65	-11.96	-12.61
GRMZM5G862540	ID_471	1	0	-27.68	-52.5	-50.73
GRMZM2G377215	ID_503	1	0	-6.71	-17	-15.94
GRMZM2G132978	ID_504	1	0	-14.59	-28.04	-30.36
GRMZM5G822237	ID_515	1	0	-19.71	-30.65	-29.88
GRMZM2G142709	ID_538	1	0	-7.94	-14.6	-12.37
GRMZM5G872373	ID_549	1	0	-2.74	-6.68	-6.61
GRMZM2G071277	ID_554	1	0	-4.63	-16.21	-14.8
AC213521.3_FG005	ID_556	1	0	-3.28	-11.81	-9.79
GRMZM2G159759	ID_567	1	0	-5.02	-8.46	-7.52
GRMZM2G082544	ID_576	1	0	-1.94	-5.39	-3.7
GRMZM2G131280	ID_577	1	0	-5.58	-7.08	-8.04
GRMZM2G049912	ID_582	1	0	-1.96	-7.48	-5.96
GRMZM2G004422	ID_593	1	0	-1.87	-5.44	-3.93
GRMZM2G417859	ID_594	1	0	-2.14	-4.69	-4.48
GRMZM2G069146	ID_600	1	0	-2.77	-6.98	-6.6
GRMZM2G165679	ID_611	1	0	-2.81	-4.33	-3.79
GRMZM2G300135	ID_616	1	0	-2.89	-5.57	-5.6
GRMZM2G153683	ID_622	1	0	-2.68	-4.33	-3.52
GRMZM2G103647	ID_644	1	0	-3.18	-4.5	-4.88
GRMZM2G472643	ID_646	1	0	-3.56	-5.68	-5.3
GRMZM2G032160	ID_656	1	0	-1.02	-1.71	-2.04
GRMZM2G056407	ID_657	1	0	-3.07	-7.07	-6.5
GRMZM2G125034	ID_668	1	0	-2.91	-4.63	-4.91
GRMZM2G149636	ID_701	1	0	-2.31	-4.05	-4.75
GRMZM2G124037	ID_707	1	0	-1.54	-3.04	-2.77
GRMZM2G098517	ID_713	1	0	-1.67	-2.52	-2.58
GRMZM2G343157	ID_718	1	0	-1.92	-3.66	-3.85
GRMZM2G054807	ID_724	1	0	-1.26	-2.59	-2.02
GRMZM5G879872	ID_725	1	0	-0.78	-2.48	-1.74
GRMZM2G110220	ID_732	1	0	-2.14	-3.49	-3.87
GRMZM2G104843	ID_734	1	0	-1.19	-1.99	-2.29
GRMZM2G300924	ID_748	1	0	-0.7	-1.09	-0.88
GRMZM2G081214	ID_752	1	0	-0.62	-1.51	-1.44
GRMZM2G181637	ID_753	1	0	-0.86	-2.64	-1.94
GRMZM2G031001	ID_767	1	0	-0.55	-1.48	-1.29
GRMZM2G380377	ID_779	1	0	-1.61	-2.38	-2.32
GRMZM2G013236	ID_786	1	0	-0.39	-1.04	-0.89
GRMZM2G051683	ID_795	1	0	-0.62	-1	-1.2
GRMZM2G051571	ID_799	1	0	-0.62	-1.38	-1.11
GRMZM2G083474	ID_804	1	0	-1.39	-2.44	-2.1
GRMZM2G158328	ID_814	1	0	-1.02	-1.31	-1.44
GRMZM2G361210	ID_819	1	0	-0.66	-1.72	-1.59
GRMZM2G092758	ID_839	1	0	-1.23	-2.86	-2.86
GRMZM2G401883	ID_885	1	0	-18.73	-25.45	-31.65
AC205362.4_FG002	ID_909	1	0	-2.02	-3.99	-3.12
GRMZM2G383404	ID_911	1	0	-7.14	-8.9	-10.47
GRMZM2G372684	ID_932	1	0	-3.43	-4.53	-5.17
GRMZM2G085086	ID_1010	1	0	-21.43	-48.15	-41.95
GRMZM2G426046	ID_1033	1	0	-2.62	-4.04	-3.53
GRMZM2G076584	ID_1037	1	0	-2.15	-4.37	-4.04
GRMZM2G137341	ID_1044	1	0	-0.82	-1.36	-1.18
GRMZM2G445634	ID_1367	1	0	-6.37	-14.56	-15.29
GRMZM2G099867	ID_1399	1	0	-12.77	-20.1	-20.53
GRMZM2G031102	ID_1403	1	0	-11.82	-19.37	-19.33
GRMZM2G104876	ID_1430	1	0	-29.43	-63.92	-60.57
GRMZM2G041127	ID_1436	1	0	-10.44	-29.42	-29.84
GRMZM2G010987	ID_1446	1	0	-6.82	-17.23	-17.68
GRMZM2G080567	ID_1450	1	0	-7.99	-19.98	-20.52
GRMZM2G047422	ID_1458	1	0	-6.25	-16.71	-15.9
GRMZM2G174396	ID_1467	1	0	-7.71	-12.27	-10.92
GRMZM2G082131	ID_1468	1	0	-0.94	-2.32	-2.04
GRMZM2G059397	ID_1469	1	0	-4.64	-10.26	-10.78
GRMZM2G174310	ID_1470	1	0	-5.51	-11.59	-12.03
GRMZM2G057672	ID_1476	1	0	-5.69	-10.73	-8.91
GRMZM2G177110	ID_1477	1	0	-5.5	-7.8	-8.72
AC194158.3_FG005	ID_1479	1	0	-8.81	-15.44	-13.89
GRMZM2G153523	ID_1485	1	0	-2.45	-5.15	-5.51
GRMZM2G120539	ID_1487	1	0	-4.19	-5.84	-5.55
GRMZM2G022514	ID_1492	1	0	-1.42	-2.28	-2.41
GRMZM2G096904	ID_1494	1	0	-1.52	-2.77	-2.32
GRMZM2G177356	ID_1495	1	0	-0.81	-2.82	-2.63
GRMZM2G320506	ID_1497	1	0	-0.28	-1.03	-0.98
GRMZM2G468932	ID_1556	1	0	-6.51	-11	-9.95
GRMZM2G404025	ID_1616	1	0	-22.52	-32.99	-31.32
GRMZM2G045318	ID_1636	1	0	-7.3	-13.51	-12.44
GRMZM2G396114	ID_1676	1	0	-7.55	-11.81	-11.44
GRMZM2G139512	ID_1716	1	0	-2.31	-4.91	-4.26
GRMZM2G381739	ID_1723	1	0	-1.68	-2.92	-3.38
GRMZM2G106276	ID_1738	1	0	-2.2	-3.92	-4.77
GRMZM2G011110	ID_1760	1	0	-0.91	-2.53	-2.2
GRMZM2G101142	ID_1763	1	0	-1.52	-2.45	-1.9
GRMZM2G381842	ID_1768	1	0	-0.9	-1.18	-1.31
GRMZM2G374074	ID_1832	1	0	-18.09	-28.18	-28.31
GRMZM2G347043	ID_1839	1	0	-4.79	-7.26	-8.06
GRMZM2G149024	ID_1850	1	0	-4.34	-7.14	-6.46
GRMZM2G134334	ID_1869	1	0	-17.08	-42.61	-44.71
GRMZM2G049185	ID_1871	1	0	-18.85	-27.84	-28.27
GRMZM2G172485	ID_1877	1	0	-4.89	-6.96	-6.91
GRMZM2G131055	ID_1888	1	0	-0.63	-1.3	-1.11
GRMZM2G079782	ID_52	10	0	17.15	-15.93	-15.85
GRMZM2G032095	ID_124	10	0	2.7	-10.34	-13.39
GRMZM2G305856	ID_137	10	0	2.04	-6.81	-6.22
AC210013.4_FG002	ID_146	10	0	3.63	-6.54	-8
GRMZM2G013206	ID_196	10	0	0.43	-3.16	-3.39
GRMZM2G099960	ID_210	10	0	2.51	-2.75	-1.79
GRMZM2G175425	ID_219	10	0	1.38	-2.19	-2.95
GRMZM2G422750	ID_241	10	0	-0.05	-3.42	-2.37
GRMZM2G367701	ID_245	10	0	1.58	-2.96	-3.28
GRMZM2G000818	ID_280	10	0	0.5	-0.94	-1.33
GRMZM2G053669	ID_286	10	0	0.83	-0.96	-1.13
GRMZM2G470857	ID_287	10	0	-0.65	-3.94	-4.06
GRMZM2G089895	ID_317	10	0	0.15	-0.92	-0.81
GRMZM2G024799	ID_331	10	0	-0.35	-1.3	-1.27
GRMZM2G066197	ID_414	10	0	9.54	-93.95	-51.66
GRMZM2G364748	ID_415	10	0	3.9	-71.27	-74.73
GRMZM2G115357	ID_416	10	0	42.01	-45.56	-37.81
GRMZM2G355572	ID_417	10	0	16.8	-63.62	-62.88
GRMZM2G445616	ID_419	10	0	3.41	-12	-14.67
GRMZM2G020150	ID_422	10	0	4.45	-9.28	-7.92
GRMZM5G819965	ID_423	10	0	10.21	-17.17	-14.01
GRMZM2G181551	ID_462	10	0	22.6	-106.85	-81.15
GRMZM2G056772	ID_468	10	0	-10.94	-47.2	-47.99
GRMZM2G310368	ID_478	10	0	11.92	-21.11	-25.86
GRMZM2G106792	ID_480	10	0	-7.11	-40.28	-35.97
GRMZM2G015605	ID_483	10	0	14.28	-25.82	-21.48
GRMZM2G028286	ID_490	10	0	12.97	-12.95	-10.03
GRMZM2G174347	ID_494	10	0	9.32	-27.94	-24.6
GRMZM2G061487	ID_497	10	0	-0.06	-14.72	-13.68
GRMZM2G474755	ID_506	10	0	10.19	-33.63	-30.52
GRMZM5G845782	ID_508	10	0	12.54	-21.72	-11.71
GRMZM2G045178	ID_511	10	0	9.9	-20.51	-11.64
GRMZM2G425004	ID_514	10	0	13.67	-22.51	-27.05
GRMZM2G057509	ID_516	10	0	0.28	-12.33	-7.38
GRMZM2G069082	ID_517	10	0	-4.64	-28.52	-26.47
GRMZM2G308595	ID_522	10	0	9.24	-21.97	-20.74
GRMZM2G044902	ID_525	10	0	1.11	-10.34	-9.52
GRMZM2G131340	ID_527	10	0	-3.59	-20.59	-17.18
GRMZM2G170120	ID_529	10	0	-0.5	-8	-7.41
GRMZM2G132185	ID_530	10	0	7.29	-10.33	-6.19
GRMZM2G003937	ID_531	10	0	-2.77	-16.25	-14.6
GRMZM2G106819	ID_541	10	0	8.85	-10.55	-8.82
GRMZM2G123394	ID_542	10	0	5.24	-12.46	-12.7
GRMZM2G083894	ID_543	10	0	-3.79	-18.09	-16.27
AC210204.3_FG002	ID_545	10	0	-0.13	-10.11	-9.3
GRMZM2G413337	ID_547	10	0	-1.41	-16.59	-14.51
GRMZM2G312661	ID_548	10	0	-3.48	-21.98	-20.95
GRMZM2G438202	ID_550	10	0	5.63	-11.77	-12.71
GRMZM2G423917	ID_551	10	0	10.85	-13.4	-13.62
GRMZM5G832939	ID_553	10	0	10.57	-12.76	-14.97
GRMZM2G151496	ID_559	10	0	-2.11	-11.12	-11.7
GRMZM2G100391	ID_561	10	0	4.38	-5.47	-7.12
GRMZM2G374629	ID_565	10	0	-0.15	-4.93	-2.74
GRMZM2G032766	ID_566	10	0	1.05	-4.32	-5.56
GRMZM2G323888	ID_569	10	0	2.76	-8.34	-7.78
GRMZM2G441903	ID_571	10	0	3.36	-6.77	-5.07
GRMZM2G401040	ID_573	10	0	-2.77	-14	-13.84
GRMZM2G080940	ID_586	10	0	-0.01	-2.66	-3.24
GRMZM2G061408	ID_590	10	0	3.78	-11.22	-7.73
GRMZM2G025895	ID_591	10	0	3.51	-11.3	-7.53
GRMZM2G401436	ID_592	10	0	2.73	-9.44	-8.71
GRMZM5G813661	ID_598	10	0	-0.22	-4.73	-4.37
GRMZM2G119168	ID_599	10	0	-0.91	-6.12	-5.6
GRMZM2G397684	ID_601	10	0	2.01	-2.6	-1.98
GRMZM2G173630	ID_603	10	0	0.17	-4.44	-4.01
GRMZM5G801190	ID_620	10	0	0.46	-6.64	-6.89
GRMZM2G090594	ID_621	10	0	2.32	-5.12	-6.19
GRMZM2G012306	ID_625	10	0	-0.4	-4.78	-4.61
GRMZM2G056014	ID_629	10	0	0.97	-1.59	-1.35
GRMZM2G364612	ID_633	10	0	0.28	-4.33	-3.87
GRMZM5G886257	ID_636	10	0	0.85	-2.68	-1.12
GRMZM2G052720	ID_637	10	0	0.62	-2.36	-1.99
GRMZM5G863344	ID_639	10	0	-0.43	-2.66	-3.49
GRMZM2G428216	ID_650	10	0	1.08	-4.19	-4.43
GRMZM2G421946	ID_653	10	0	-0.4	-3.64	-4.44
GRMZM2G086163	ID_665	10	0	0.92	-1.86	-1.21
GRMZM2G069126	ID_670	10	0	3.79	-5.35	-4.89
GRMZM2G333811	ID_671	10	0	0.65	-2.3	-1.12
GRMZM2G303964	ID_672	10	0	-1.3	-5.44	-6.15
GRMZM2G437912	ID_675	10	0	-0.62	-2.72	-2.79
GRMZM2G130764	ID_678	10	0	0.19	-2.07	-1.38
GRMZM2G023237	ID_681	10	0	-0.46	-4.32	-3.97
GRMZM2G125838	ID_683	10	0	3.23	-4.48	-4.49
GRMZM2G414540	ID_684	10	0	-0.32	-3.28	-3.22
GRMZM2G101409	ID_686	10	0	-0.5	-2.31	-2.24
GRMZM2G066213	ID_688	10	0	0.7	-1.05	-1.14
AC205471.4_FG007	ID_692	10	0	0.06	-3.47	-2.42
GRMZM2G144997	ID_697	10	0	-0.57	-2.77	-2.79
GRMZM2G061723	ID_708	10	0	0.2	-2.65	-2.15
GRMZM2G334165	ID_709	10	0	-0.03	-1.99	-1.24
GRMZM2G026151	ID_710	10	0	0.01	-2.61	-2.45
GRMZM2G042756	ID_715	10	0	1.46	-6.42	-5.14
GRMZM2G133189	ID_721	10	0	0.59	-0.96	-0.3
GRMZM2G167336	ID_750	10	0	0.6	-0.78	-0.4
GRMZM2G378442	ID_751	10	0	0.88	-2.42	-0.99
GRMZM2G042278	ID_755	10	0	-0.26	-1.6	-1.36
GRMZM2G340578	ID_759	10	0	0.34	-0.91	-0.97
GRMZM2G318180	ID_772	10	0	0.24	-1.78	-1.41
GRMZM2G090328	ID_808	10	0	0.54	-0.88	-0.27
GRMZM2G177340	ID_1022	10	0	-1.99	-14.17	-12.81
GRMZM2G055151	ID_1166	10	0	2.76	-9.58	-8.25
GRMZM2G081949	ID_1433	10	0	-11.97	-57.9	-56.61
AC225718.2_FG006	ID_1439	10	0	33.2	-46.29	-45.3
GRMZM5G847466	ID_1440	10	0	26.96	-28.01	-31.16
GRMZM2G392125	ID_1443	10	0	29.46	-52.05	-40.52
GRMZM2G139815	ID_1449	10	0	-4.28	-17.2	-15.7
GRMZM2G380432	ID_1451	10	0	5.97	-23.5	-25.03
GRMZM2G044498	ID_1452	10	0	-1.51	-8.99	-7.77
GRMZM5G866334	ID_1453	10	0	9.17	-9.32	-6.83
GRMZM2G097900	ID_1454	10	0	14.35	-14.37	-15.6
GRMZM2G031580	ID_1455	10	0	2.53	-10.67	-10.77
AC206951.3_FG017	ID_1456	10	0	10.17	-14.19	-18.92
GRMZM2G093962	ID_1457	10	0	-2.59	-17.61	-14.66
GRMZM2G420883	ID_1460	10	0	6.43	-12.52	-16.75
GRMZM2G177050	ID_1461	10	0	-2.66	-13.32	-13.12
GRMZM2G149422	ID_1462	10	0	-1.65	-8.95	-8.69
GRMZM2G164591	ID_1464	10	0	0.73	-5.29	-7.1
GRMZM2G101245	ID_1471	10	0	0.28	-9.05	-9.55
GRMZM2G035749	ID_1472	10	0	-0.04	-1.11	-1.29
GRMZM2G044537	ID_1480	10	0	2.75	-5.89	-5.73
GRMZM2G068967	ID_1482	10	0	-1.71	-8.94	-10.87
GRMZM2G399218	ID_1488	10	0	-0.89	-4.43	-5.1
GRMZM2G018336	ID_1496	10	0	-0.19	-2.2	-1.9
GRMZM2G172357	ID_1568	10	0	0.19	-48.29	-23.71
GRMZM2G114954	ID_1572	10	0	-6	-25.95	-19.56
GRMZM2G098884	ID_1621	10	0	1.61	-5.81	-6.75
GRMZM2G062470	ID_1625	10	0	1.1	-2.06	-2.13
GRMZM2G057258	ID_1627	10	0	-0.94	-12.58	-6.53
GRMZM2G304947	ID_1628	10	0	10.92	-26.35	-16.96
GRMZM2G022054	ID_1634	10	0	3.62	-10.47	-7.51
AC204712.3_FG002	ID_1664	10	0	7.18	-11.99	-8.08
GRMZM2G309193	ID_1681	10	0	-0.38	-12.88	-8.12
GRMZM2G162382	ID_1682	10	0	-0.12	-3.15	-3.92
GRMZM2G145101	ID_1722	10	0	1.63	-2.19	-1.61
GRMZM2G111216	ID_1750	10	0	-0.54	-3.21	-2.16
GRMZM2G179147	ID_1751	10	0	-0.1	-3.08	-1.67
GRMZM2G037015	ID_1779	10	0	-17.19	-66.75	-60.59
GRMZM2G089995	ID_1780	10	0	-3.92	-43.66	-40.83
GRMZM2G117007	ID_1781	10	0	-6.45	-33.02	-30.18
GRMZM2G357631	ID_1782	10	0	2.92	-47.6	-43.49
GRMZM2G020054	ID_1783	10	0	6.41	-36.08	-36.91
GRMZM2G345717	ID_1787	10	0	0.64	-3.06	-1.9
GRMZM2G137596	ID_1860	10	0	-0.71	-4.79	-4.94
GRMZM2G119823	ID_1863	10	0	3.07	-4.54	-4.39
GRMZM2G110997	ID_1868	10	0	10.87	-18.97	-16.17
GRMZM2G037189	ID_1870	10	0	-3.14	-29.43	-31.53
GRMZM2G421795	ID_1883	10	0	0.78	-1.34	-1.86
GRMZM2G343317	ID_1887	10	0	-1.17	-6.61	-7.6
GRMZM2G148536	ID_11	6	0	-102.79	-12.7	-130.05
GRMZM2G116282	ID_13	6	0	-194.13	-67.33	-150.19
GRMZM2G118637	ID_51	6	0	-24.03	-5.91	-16.63
GRMZM2G079256	ID_56	6	0	-12.63	0.38	-19.12
GRMZM2G013619	ID_61	6	0	-27.51	-1.13	-19.09
GRMZM2G175447	ID_67	6	0	-12.71	1.08	-9.37
AC198361.3_FG004	ID_68	6	0	-25.93	-12.46	-23.08
GRMZM2G118433	ID_69	6	0	-11.33	10.83	-13.77
GRMZM5G870077	ID_70	6	0	-17.39	-0.24	-23.62
GRMZM2G025783	ID_71	6	0	-12.73	-0.55	-10.47
GRMZM2G064967	ID_79	6	0	-11.31	-0.94	-11.7
GRMZM2G179523	ID_94	6	0	-8.14	-0.29	-7.67
GRMZM2G145753	ID_98	6	0	-5.67	5.34	-9.13
GRMZM2G458208	ID_99	6	0	-13.33	-4.44	-10.55
GRMZM2G433616	ID_100	6	0	-10.83	5.56	-5.09
AC233952.1_FG006	ID_101	6	0	-9.2	-0.96	-11.24
GRMZM2G082931	ID_135	6	0	-4.12	-1.43	-4.21
GRMZM2G316232	ID_136	6	0	-6.43	1.65	-5
GRMZM2G159002	ID_144	6	0	-4.28	3.68	-2.6
GRMZM2G475349	ID_145	6	0	-8.91	-1.51	-5.17
GRMZM2G173067	ID_147	6	0	-5.98	2.16	-7.31
GRMZM2G347583	ID_162	6	0	-5.75	-2.31	-4.12
GRMZM2G048165	ID_163	6	0	-2.53	0	-4.95
GRMZM2G331368	ID_170	6	0	-1.57	1.16	-1.28
GRMZM2G046590	ID_173	6	0	-2.01	0.9	-2.24
GRMZM2G107239	ID_176	6	0	-5.75	1.32	-3.54
GRMZM2G015277	ID_177	6	0	-7.18	1.39	-4.75
GRMZM2G312521	ID_180	6	0	-1.49	-0.29	-1.79
GRMZM2G116981	ID_186	6	0	-5.08	2.01	-5.2
GRMZM2G344967	ID_190	6	0	-4.37	-0.74	-2.3
GRMZM2G023636	ID_191	6	0	-3.08	-0.59	-2.82
GRMZM2G107686	ID_200	6	0	-5.29	0.46	-6.5
GRMZM2G079683	ID_203	6	0	-4.15	-0.23	-5.04
AC196278.2_FG003	ID_204	6	0	-3.45	-1.29	-3.8
GRMZM2G076730	ID_209	6	0	-4.65	-0.66	-3.41
GRMZM2G101270	ID_220	6	0	-2.71	0.14	-2.2
GRMZM2G145201	ID_225	6	0	-1.89	1.15	-2.23
GRMZM2G471186	ID_227	6	0	-2.78	1.73	-1.69
GRMZM2G045128	ID_228	6	0	-2.82	0.48	-2.3
GRMZM2G358877	ID_231	6	0	-2.28	0.57	-1.26
GRMZM2G162286	ID_237	6	0	-1.39	-0.13	-2.27
GRMZM2G103599	ID_242	6	0	-2.74	-1.07	-2.25
GRMZM2G348675	ID_243	6	0	-1.52	0.97	-1.9
GRMZM5G807734	ID_253	6	0	-1.35	0.23	-1.4
AC209705.3_FG004	ID_255	6	0	-2.22	0.6	-1.57
GRMZM2G402088	ID_274	6	0	-1.39	-0.23	-0.98
GRMZM2G084819	ID_288	6	0	-0.92	0.15	-0.63
GRMZM2G172834	ID_291	6	0	-1.63	-0.78	-1.41
GRMZM2G322493	ID_292	6	0	-2.82	0.2	-2.43
GRMZM2G478382	ID_294	6	0	-2.75	-0.12	-2.03
GRMZM5G821791	ID_295	6	0	-2.71	0.07	-2.89
GRMZM2G049351	ID_297	6	0	-1.9	0.05	-1.44
GRMZM2G438938	ID_302	6	0	-1.16	0.87	-0.91
GRMZM2G327208	ID_308	6	0	-1.55	0.31	-2
GRMZM2G018142	ID_316	6	0	-1.51	-0.09	-1.17
GRMZM2G316740	ID_332	6	0	-0.73	-0.18	-1.2
GRMZM2G060541	ID_337	6	0	-1.38	0.34	-1.39
GRMZM2G418037	ID_360	6	0	-1.28	0.48	-0.52
GRMZM2G089421	ID_448	6	0	-133.12	-7.4	-162.71
GRMZM5G805526	ID_449	6	0	-117.45	55.44	-47.77
GRMZM2G026216	ID_451	6	0	-171.25	-50.62	-108.75
GRMZM2G145758	ID_479	6	0	-13.57	-6.07	-17.94
GRMZM2G310548	ID_513	6	0	-13.84	6.17	-9.14
GRMZM2G389173	ID_526	6	0	-9.83	-3.83	-9.06
GRMZM2G031326	ID_539	6	0	-4.68	-0.08	-6.89
GRMZM2G151649	ID_606	6	0	-1.55	0.34	-1.62
GRMZM2G159937	ID_614	6	0	-3.23	-0.73	-5.22
GRMZM2G007729	ID_694	6	0	-3.48	1.86	-3.89
GRMZM2G398807	ID_859	6	0	-170.36	-71.17	-192.42
GRMZM2G023291	ID_886	6	0	-16.74	-0.81	-19.34
GRMZM2G017186	ID_889	6	0	-43.41	-18.43	-35.35
GRMZM2G428096	ID_913	6	0	-8.89	0.15	-6.51
GRMZM2G043489	ID_917	6	0	-5.62	-1.71	-4.84
GRMZM2G048377	ID_920	6	0	-8.8	-1.54	-6.13
GRMZM2G085295	ID_923	6	0	-7.21	-1.71	-4.56
GRMZM2G180150	ID_925	6	0	-8.32	-3.83	-8.62
GRMZM2G072861	ID_928	6	0	-8	-2.63	-6.21
GRMZM2G013773	ID_929	6	0	-8.46	-0.65	-4.64
GRMZM5G897473	ID_931	6	0	-8.45	0.54	-5.32
AC190909.3_FG004	ID_937	6	0	-8.55	-0.6	-6.33
GRMZM2G331533	ID_942	6	0	-3.62	1.7	-1.83
AC197672.3_FG002	ID_944	6	0	-5.06	-0.65	-3.99
GRMZM2G442057	ID_945	6	0	-5.02	-0.27	-2.59
GRMZM5G820122	ID_946	6	0	-5.06	-1.14	-4.1
GRMZM5G824439	ID_956	6	0	-3.17	0.93	-1.85
GRMZM2G420789	ID_957	6	0	-3.74	-0.52	-3.27
GRMZM2G312110	ID_959	6	0	-4.53	1.74	-1.93
GRMZM2G373849	ID_961	6	0	-5.04	-1.26	-4.1
GRMZM2G074572	ID_963	6	0	-3.87	0.4	-1.86
GRMZM2G004087	ID_964	6	0	-2.7	0.62	-2.12
GRMZM2G398527	ID_965	6	0	-4.84	-0.25	-3.1
GRMZM2G302913	ID_966	6	0	-3.86	0.17	-2.05
GRMZM2G119657	ID_968	6	0	-3.29	-0.09	-1.58
GRMZM2G153797	ID_972	6	0	-2.87	0.22	-1.3
GRMZM2G473310	ID_974	6	0	-3.34	-0.87	-1.94
GRMZM2G018241	ID_976	6	0	-2.24	-0.93	-1.55
GRMZM2G379913	ID_978	6	0	-3.11	1.05	-1.53
GRMZM2G092627	ID_980	6	0	-2.86	0.11	-1.34
GRMZM2G370162	ID_981	6	0	-2.37	0.37	-1.56
GRMZM2G053588	ID_982	6	0	-1.87	-0.15	-1.26
GRMZM2G321420	ID_983	6	0	-2.87	-0.97	-2.42
GRMZM2G095905	ID_984	6	0	-2.09	0.95	-1.46
GRMZM2G476810	ID_986	6	0	-3.02	0.37	-1.87
GRMZM2G443447	ID_987	6	0	-2.41	-0.42	-1.74
GRMZM2G347322	ID_988	6	0	-5.44	-2.19	-5.28
GRMZM2G078024	ID_993	6	0	-1.68	-0.47	-1.26
GRMZM2G475362	ID_998	6	0	-1.69	-0.39	-1.09
GRMZM2G074454	ID_1001	6	0	-1.02	0.41	-0.54
GRMZM2G380456	ID_1002	6	0	-1.01	0.01	-0.72
GRMZM2G409839	ID_1006	6	0	-1.35	-0.07	-1.1
GRMZM2G162388	ID_1011	6	0	-39.19	4.24	-32.29
GRMZM2G092968	ID_1014	6	0	-36.38	-14.17	-25.35
GRMZM5G805382	ID_1019	6	0	-14.03	-5.19	-13.28
GRMZM2G134178	ID_1024	6	0	-10.08	-3.96	-8.25
GRMZM2G043857	ID_1034	6	0	-0.93	-0.34	-1.24
GRMZM2G064096	ID_1057	6	0	-766.88	-355.58	-730.96
GRMZM2G102356	ID_1065	6	0	-171.78	-72.83	-115.46
GRMZM2G077222	ID_1108	6	0	-15.39	-7.53	-13.32
GRMZM2G470292	ID_1137	6	0	-11.42	0	-5.65
GRMZM2G429128	ID_1152	6	0	-5.66	4.27	-2.43
GRMZM2G379929	ID_1157	6	0	-9.62	2.58	-3.78
GRMZM2G044055	ID_1168	6	0	-5.43	-1.52	-4.41
GRMZM2G432839	ID_1172	6	0	-5.05	2.97	-2.28
GRMZM2G470914	ID_1178	6	0	-5.4	-1.56	-3.24
GRMZM2G042181	ID_1182	6	0	-5.92	-2.26	-5.04
GRMZM2G174680	ID_1183	6	0	-5.98	-2.73	-5
GRMZM2G432926	ID_1188	6	0	-5.85	-0.91	-4.46
GRMZM2G371839	ID_1193	6	0	-5.07	2.18	-1.84
AC155622.2_FG004	ID_1194	6	0	-4.22	1.9	-2.31
GRMZM2G015285	ID_1198	6	0	-4.95	-1.78	-5.52
GRMZM5G873286	ID_1202	6	0	-5.02	-1.7	-3.35
AC229978.2_FG002	ID_1205	6	0	-5.17	-0.77	-3.62
GRMZM2G445478	ID_1210	6	0	-2.38	0.54	-1.35
GRMZM2G465769	ID_1222	6	0	-2.93	-0.69	-1.97
GRMZM2G123246	ID_1223	6	0	-5.15	-2.1	-3.7
GRMZM2G168365	ID_1235	6	0	-2.34	0.88	-2.35
GRMZM2G012932	ID_1236	6	0	-3.2	-0.52	-1.91
GRMZM2G000177	ID_1237	6	0	-3.24	0.36	-1.71
GRMZM5G849284	ID_1239	6	0	-2.87	0.32	-1.49
GRMZM5G828278	ID_1241	6	0	-1.39	1.03	-0.76
GRMZM2G380777	ID_1246	6	0	-3.24	0.72	-1.68
GRMZM2G312974	ID_1250	6	0	-3.46	-0.67	-2.07
GRMZM2G082633	ID_1259	6	0	-0.64	0.24	-0.8
GRMZM2G405064	ID_1268	6	0	-2.07	0.96	-0.9
AC186231.4_FG002	ID_1278	6	0	-0.86	-0.22	-1.12
GRMZM2G070126	ID_1284	6	0	-2.2	0.02	-1.44
GRMZM2G067915	ID_1290	6	0	-3.14	-1.52	-3.03
GRMZM2G471139	ID_1295	6	0	-0.88	0.29	-0.52
GRMZM2G381402	ID_1297	6	0	-1.5	-0.13	-1.19
GRMZM2G060866	ID_1309	6	0	-1.89	-0.34	-1.19
GRMZM2G173596	ID_1310	6	0	-1.79	-0.55	-2.53
GRMZM2G162450	ID_1312	6	0	-1.73	0	-1.13
GRMZM2G401831	ID_1314	6	0	-1.46	0.24	-0.95
GRMZM5G827026	ID_1321	6	0	-1.16	0.3	-0.63
GRMZM2G353076	ID_1324	6	0	-1.04	-0.27	-0.57
GRMZM2G329944	ID_1333	6	0	-1.3	0.06	-0.85
GRMZM2G353469	ID_1341	6	0	-1.25	-0.36	-1.03
GRMZM2G044864	ID_1345	6	0	-1.17	0.13	-0.56
GRMZM2G108959	ID_1348	6	0	-1.06	-0.38	-0.69
GRMZM2G130207	ID_1381	6	0	-32.23	0.86	-43.35
GRMZM5G828312	ID_1388	6	0	-67.64	-20.37	-83.52
GRMZM2G030293	ID_1423	6	0	-104.32	-20.38	-125.06
GRMZM2G101958	ID_1427	6	0	-58.2	-1.03	-34.41
GRMZM2G329353	ID_1466	6	0	-1.37	2.33	-4.13
GRMZM2G017414	ID_1475	6	0	-3.45	3.3	-3.39
GRMZM2G316275	ID_1478	6	0	-8.28	-3.59	-5.76
GRMZM2G406493	ID_1499	6	0	-1.46	0.14	-1.51
GRMZM2G107711	ID_1512	6	0	-47.44	-14.87	-29.89
GRMZM2G150521	ID_1578	6	0	-7.7	-3.59	-7.14
GRMZM5G806622	ID_1590	6	0	-3.34	1.02	-7.53
GRMZM2G138572	ID_1630	6	0	-3.32	1.26	-7.54
GRMZM2G301208	ID_1660	6	0	-5.84	-1.07	-6.4
GRMZM2G441347	ID_1666	6	0	-10.14	3.74	-12.33
GRMZM2G352132	ID_1673	6	0	-9.79	-5.14	-10.95
AC183932.3_FG007	ID_1691	6	0	-4.49	-0.94	-3.4
AC234520.1_FG003	ID_1709	6	0	-4.37	-1.35	-7.27
GRMZM2G006714	ID_1747	6	0	-2.19	-0.37	-2.46
GRMZM2G053977	ID_1767	6	0	-2.56	0.69	-2.71
GRMZM2G017869	ID_1854	6	0	-3.19	-1.5	-3.25
GRMZM2G042895	ID_1880	6	0	-10.41	-2.39	-10.36
GRMZM2G084958	ID_1	3	0	-722.25	-595.53	-1085.45
GRMZM2G079908	ID_8	3	0	-67.89	-108.65	-293.75
AC190623.3_FG001	ID_9	3	0	-281.6	-287.22	-419.79
GRMZM2G122337	ID_10	3	0	-186.84	-177.53	-295.73
GRMZM2G057281	ID_16	3	0	-103.99	-147.6	-340.26
GRMZM2G148646	ID_19	3	0	-93.22	-57.9	-130.53
GRMZM2G105644	ID_24	3	0	-102.94	-101.93	-155.14
GRMZM2G156816	ID_27	3	0	-53.24	-49.56	-71.25
GRMZM2G174984	ID_28	3	0	-25.87	-36.14	-71.23
GRMZM5G821637	ID_29	3	0	-47.27	-51.63	-87.45
GRMZM2G090718	ID_35	3	0	-67.08	-63.1	-98.86
GRMZM2G073814	ID_37	3	0	-44.46	-48.28	-65.4
GRMZM2G337113	ID_39	3	0	-47.43	-55.56	-84.95
AC233893.1_FG006	ID_78	3	0	-17.39	-11.5	-26.44
GRMZM2G357620	ID_151	3	0	-6.3	-7.21	-9.74
GRMZM2G423555	ID_187	3	0	-2.17	-1.4	-2.54
GRMZM5G856297	ID_197	3	0	-1.16	-1.21	-1.88
GRMZM2G177220	ID_214	3	0	-1.31	-0.7	-1.96
GRMZM2G406119	ID_234	3	0	-4.14	-4.62	-6.73
GRMZM2G066618	ID_246	3	0	-3.84	-2.59	-5.34
GRMZM2G352627	ID_257	3	0	-1.28	-1.67	-2.89
GRMZM2G100380	ID_264	3	0	-0.89	-0.66	-1.85
GRMZM2G032594	ID_277	3	0	-2.4	-2.74	-3.66
GRMZM2G078050	ID_284	3	0	-2.37	-2.38	-4.06
GRMZM2G058518	ID_310	3	0	-0.74	-0.94	-1.46
GRMZM2G154449	ID_322	3	0	-1.63	-1.56	-2.25
GRMZM2G339728	ID_324	3	0	-0.74	-0.82	-2.05
AC234521.1_FG004	ID_325	3	0	-1.57	-1.27	-2.65
GRMZM2G149315	ID_334	3	0	-1.64	-0.78	-2.16
GRMZM2G367023	ID_345	3	0	-1.37	-0.76	-1.56
GRMZM2G078324	ID_434	3	0	-0.66	-1.04	-2.53
GRMZM2G040369	ID_473	3	0	-7	-10.5	-29.8
AC233872.1_FG003	ID_474	3	0	-5.99	-3.52	-13.12
GRMZM2G095851	ID_498	3	0	-3.72	-5.2	-15.2
GRMZM2G001930	ID_524	3	0	-2.07	-2.79	-6.92
GRMZM2G174558	ID_575	3	0	-1.8	-2.4	-4.63
GRMZM2G091124	ID_661	3	0	-1.13	-0.79	-1.5
GRMZM2G406024	ID_667	3	0	-4.95	-4.21	-7.55
GRMZM2G075245	ID_777	3	0	-0.4	-0.56	-1.18
GRMZM2G377855	ID_860	3	0	-85.07	-84.99	-150.37
GRMZM2G451224	ID_862	3	0	-106.17	-108.18	-166.73
GRMZM2G016677	ID_863	3	0	-102.61	-90.81	-154.49
GRMZM2G372102	ID_866	3	0	-97.56	-67.25	-121.36
GRMZM2G038519	ID_869	3	0	-53.4	-47.84	-90.04
GRMZM2G017290	ID_870	3	0	-65.52	-62.47	-98.3
GRMZM2G096269	ID_879	3	0	-27.41	-16.08	-37.23
GRMZM2G323024	ID_904	3	0	-12.59	-6.8	-17.4
GRMZM2G089836	ID_907	3	0	-6.88	-3.4	-11.53
GRMZM2G320152	ID_924	3	0	-4.64	-5.21	-7.03
GRMZM2G444801	ID_933	3	0	-3.54	-3.33	-5.69
GRMZM2G056236	ID_973	3	0	-3.07	-2.29	-4.03
GRMZM2G092427	ID_1071	3	0	-48.43	-31.97	-114.62
GRMZM2G153184	ID_1072	3	0	-91.12	-79.54	-134.29
GRMZM5G804323	ID_1082	3	0	-49.92	-47.9	-84.03
GRMZM2G072280	ID_1091	3	0	-22.48	-10.97	-44.98
GRMZM2G177412	ID_1093	3	0	-31.61	-27.56	-43.22
GRMZM2G003970	ID_1118	3	0	-8.31	-5.76	-10.09
GRMZM2G142870	ID_1214	3	0	-2.91	-1.61	-3.79
GRMZM2G127853	ID_1272	3	0	-1.19	-0.77	-1.78
GRMZM2G122231	ID_1365	3	0	-4.07	-4.86	-6.84
GRMZM2G377168	ID_1380	3	0	-50.57	-44.65	-143.49
GRMZM2G150656	ID_1382	3	0	-4.68	-6.95	-18.42
GRMZM5G832229	ID_1397	3	0	-15.14	-23.21	-58.18
GRMZM2G034206	ID_1409	3	0	-16.78	-12.79	-26.93
GRMZM2G305154	ID_1575	3	0	-9.68	-12.28	-16.06
GRMZM2G012276	ID_1588	3	0	-30.41	-32.62	-53.97
GRMZM5G822591	ID_1598	3	0	-6.49	-5.5	-19.43
GRMZM2G384070	ID_1604	3	0	-6.67	-5.77	-9.88
GRMZM2G067522	ID_1613	3	0	-13.61	-12.34	-18.43
GRMZM2G089308	ID_1656	3	0	-10.05	-8.77	-18.49
GRMZM2G702113	ID_1669	3	0	-9.55	-11.74	-17.7
GRMZM2G080355	ID_1678	3	0	-12.76	-13.92	-18.5
GRMZM2G097674	ID_1679	3	0	-7.98	-6.07	-10.61
GRMZM2G082976	ID_1683	3	0	-1.22	-1.35	-1.85
GRMZM2G467370	ID_1697	3	0	-3.84	-4.51	-7.27
GRMZM2G077036	ID_1699	3	0	-4.21	-3.5	-6.48
AC200057.4_FG007	ID_1715	3	0	-3.91	-2.82	-6.46
GRMZM2G478430	ID_1724	3	0	-5.2	-5.45	-8.51
GRMZM2G009804	ID_1729	3	0	-1.1	-1.26	-3.05
GRMZM2G091540	ID_1741	3	0	-1.2	-1.17	-1.69
AC210169.3_FG002	ID_1746	3	0	-3.18	-1.38	-4.35
AC204711.3_FG002	ID_1825	3	0	-3.63	-3.82	-5.39
AC199315.4_FG001	ID_1866	3	0	-49.9	-74.93	-190.64
GRMZM2G173965	ID_1885	3	0	-1.93	-1.28	-2.63
AC216353.2_FG005	ID_0	0	0	-1435.08	-3330.99	-4273.89
GRMZM2G179703	ID_23	0	0	-37.73	-58.08	-92.71
GRMZM2G044882	ID_30	0	0	-38.13	-63.24	-83.15
GRMZM2G101875	ID_72	0	0	-8.02	-18.62	-28.03
GRMZM2G135536	ID_87	0	0	-7.43	-14.83	-33.18
GRMZM2G001898	ID_142	0	0	-2.44	-4.12	-5.66
GRMZM2G177242	ID_148	0	0	-1.55	-5.47	-7.91
GRMZM2G034302	ID_160	0	0	-1.97	-3.38	-4.58
GRMZM2G081822	ID_185	0	0	-2.89	-4.49	-6.42
GRMZM2G414727	ID_221	0	0	-3.62	-5.05	-6.98
GRMZM2G063566	ID_250	0	0	-1.1	-2.07	-3.2
GRMZM5G894582	ID_251	0	0	-1.05	-2.15	-4.07
GRMZM2G077535	ID_258	0	0	-0.77	-1.64	-2.31
GRMZM2G133057	ID_268	0	0	-0.49	-1.13	-1.72
AC235540.1_FG002	ID_273	0	0	-1.51	-2.3	-2.96
GRMZM2G126972	ID_285	0	0	-1.23	-2.16	-3.43
GRMZM2G347280	ID_301	0	0	-0.28	-1.35	-1.8
GRMZM2G413422	ID_303	0	0	-0.79	-1.09	-1.48
GRMZM2G113158	ID_604	0	0	-1.33	-2.14	-2.82
GRMZM2G147346	ID_619	0	0	-1.84	-5.33	-7.83
GRMZM2G428040	ID_647	0	0	-1.53	-2.33	-2.97
GRMZM2G132212	ID_703	0	0	-0.63	-1.17	-1.45
GRMZM2G420715	ID_727	0	0	-0.46	-1.88	-2.59
GRMZM2G180775	ID_776	0	0	-0.85	-1.56	-1.95
GRMZM2G137108	ID_935	0	0	-3.43	-4.85	-6.86
GRMZM2G019246	ID_1027	0	0	-1.79	-2.72	-3.46
GRMZM2G054896	ID_1386	0	0	-29.99	-44.76	-77.43
GRMZM2G064437	ID_1405	0	0	-0.72	-1.81	-3.47
GRMZM2G334181	ID_1407	0	0	-1.43	-2.81	-3.86
GRMZM2G159477	ID_1481	0	0	-3.05	-4.39	-6.33
GRMZM2G006704	ID_1544	0	0	-43.94	-63.29	-99.11
GRMZM2G164868	ID_1565	0	0	-21.26	-32.82	-45.61
GRMZM2G408458	ID_1597	0	0	-10.74	-21.84	-26.81
GRMZM2G096165	ID_1601	0	0	-9.47	-15.65	-25.61
GRMZM2G369991	ID_1622	0	0	-6.57	-10.91	-16.92
GRMZM2G174769	ID_1711	0	0	-2.36	-3.44	-5.62
GRMZM2G012756	ID_1755	0	0	-0.79	-2.76	-4.35
GRMZM2G146246	ID_3	9	0	27.08	-62.82	-179.08
GRMZM2G090626	ID_12	9	0	-0.4	-51.33	-199.37
GRMZM2G134256	ID_57	9	0	-0.91	-6.06	-20.98
GRMZM5G855337	ID_89	9	0	-4.78	-15.14	-26.66
GRMZM2G061932	ID_97	9	0	-3.56	-8.49	-23.96
GRMZM2G131120	ID_111	9	0	-1.6	-2.93	-7.36
GRMZM2G095725	ID_120	9	0	-2.61	-7.5	-13.82
GRMZM5G807267	ID_155	9	0	1.44	-3.17	-7.17
GRMZM2G043300	ID_183	9	0	0.6	-3.52	-5.03
GRMZM2G037146	ID_281	9	0	-0.4	-1.97	-2.95
GRMZM2G167578	ID_318	9	0	0.23	-1.23	-1.95
AC217887.3_FG004	ID_329	9	0	0.31	-0.25	-1.03
GRMZM5G862317	ID_371	9	0	0.26	-0.45	-0.99
GRMZM2G066636	ID_420	9	0	-0.47	-12.07	-16.94
GRMZM2G333980	ID_464	9	0	4.24	-44.65	-67.88
GRMZM2G072729	ID_470	9	0	-4.32	-12.42	-40.12
GRMZM2G099239	ID_485	9	0	5.31	-9.49	-19.8
GRMZM2G135501	ID_528	9	0	-1.65	-5.94	-12.26
GRMZM2G097704	ID_562	9	0	2.31	-3	-6.73
GRMZM2G147544	ID_568	9	0	4.14	-4.57	-8.21
GRMZM2G134878	ID_588	9	0	1	-6.62	-11.2
GRMZM5G808017	ID_645	9	0	-0.24	-1.23	-2.23
GRMZM2G310947	ID_648	9	0	0.21	-1.91	-2.73
GRMZM2G146614	ID_649	9	0	-0.05	-4.06	-6.2
GRMZM2G073324	ID_763	9	0	0.56	-0.74	-1.71
GRMZM2G367094	ID_765	9	0	0.63	-1.92	-2.78
GRMZM2G125571	ID_780	9	0	0.31	-0.26	-1.07
GRMZM2G107562	ID_876	9	0	-13.37	-35.74	-86.42
GRMZM2G067992	ID_1390	9	0	-1.58	-19.16	-71.48
GRMZM2G395853	ID_1415	9	0	1.11	-1.55	-3.98
GRMZM2G078174	ID_1573	9	0	-4.29	-26.47	-46.73
GRMZM2G132862	ID_1618	9	0	-0.22	-11.06	-20.9
GRMZM2G106945	ID_1710	9	0	-0.18	-2.78	-7.76
GRMZM2G179777	ID_1728	9	0	0.49	-1.14	-4.68
GRMZM2G437575	ID_1776	9	0	-1.11	-3.13	-9.52
GRMZM2G567452	ID_6	17	0	57.43	-48.22	-101.62
GRMZM2G126190	ID_21	17	0	69.83	10.06	-72.89
GRMZM2G146015	ID_42	17	0	54.91	34.15	-55.52
AC196475.3_FG004	ID_43	17	0	34.65	-13.11	-43.63
GRMZM2G099097	ID_63	17	0	38.18	7.03	-24.19
GRMZM2G066326	ID_83	17	0	20.27	-3.04	-17.6
AC209819.3_FG005	ID_106	17	0	22.84	7.6	-3.97
GRMZM2G457309	ID_167	17	0	3.87	1.58	-1.02
GRMZM5G883759	ID_199	17	0	6.96	-1.05	-3.55
AC226235.2_FG001	ID_207	17	0	3.03	-2.62	-4.11
GRMZM2G332522	ID_216	17	0	0.95	-0.86	-1.86
GRMZM5G837822	ID_252	17	0	2.06	-1.98	-3.27
GRMZM2G072808	ID_263	17	0	2.34	-1.72	-3.6
GRMZM2G320023	ID_278	17	0	2.48	-0.74	-1.8
GRMZM2G173669	ID_298	17	0	0.94	0.37	-0.29
GRMZM2G701109	ID_315	17	0	0.61	0.18	-0.46
GRMZM2G122302	ID_347	17	0	1.44	0.12	-0.91
GRMZM2G044104	ID_358	17	0	2.19	0.7	-0.43
GRMZM2G061515	ID_424	17	0	7.04	-2.36	-5.2
GRMZM2G436593	ID_461	17	0	17.43	-15.32	-34.65
GRMZM2G176998	ID_475	17	0	42.25	5.62	-18.2
GRMZM2G076348	ID_482	17	0	2.71	-0.59	-3.31
GRMZM2G386674	ID_484	17	0	19.33	-10.51	-30.53
GRMZM5G853245	ID_495	17	0	4.29	2.56	-4.18
GRMZM5G878379	ID_518	17	0	6.24	-6.48	-10
GRMZM2G003682	ID_558	17	0	9.3	-6.02	-9.78
GRMZM2G105348	ID_608	17	0	11.74	4.93	-3.04
GRMZM2G112629	ID_615	17	0	1.63	-0.08	-1.54
GRMZM2G129018	ID_664	17	0	3.78	0.43	-2.01
GRMZM2G090493	ID_690	17	0	0.98	-0.65	-0.84
GRMZM2G010855	ID_696	17	0	3.34	0.97	-2.73
GRMZM2G082034	ID_706	17	0	1.86	0.07	-1.26
GRMZM2G375159	ID_731	17	0	2.87	-1	-1.81
GRMZM2G149178	ID_1058	17	0	304.19	81.38	-213.04
AC155610.2_FG009	ID_1059;ID_1378	17	0	320.19	-170.83	-1018.69
GRMZM2G092743	ID_1069	17	0	132.26	29.9	-36.51
GRMZM2G479245	ID_1132	17	0	11.64	1.62	-3.82
GRMZM2G388834	ID_1359	17	0	0.9	0.36	-0.11
GRMZM2G180384	ID_1389	17	0	4.44	2.1	-1.86
GRMZM2G356938	ID_1393	17	0	5.49	0.71	-7.16
GRMZM2G165192	ID_1401	17	0	4.03	-0.7	-3.01
GRMZM2G367668	ID_1410	17	0	1.46	-1.26	-2.13
GRMZM2G105587	ID_1503	17	0	248.73	42.1	-183.54
GRMZM2G144653	ID_1504	17	0	235.52	-15.1	-251.37
GRMZM2G466984	ID_1521	17	0	19.91	0.74	-11.7
GRMZM2G470608	ID_1525	17	0	7.71	-5.39	-14
GRMZM2G108474	ID_1542	17	0	97.05	37.26	-121.48
GRMZM2G329144	ID_1586	17	0	20.77	-7.56	-18.67
GRMZM5G878308	ID_1592	17	0	50.58	21.71	-9.44
GRMZM2G034013	ID_1612	17	0	6.1	-5.39	-7.67
AC203424.3_FG001	ID_1620	17	0	11.63	-4.23	-12.55
GRMZM2G143499	ID_1646	17	0	4.4	1.05	-3.18
GRMZM2G031637	ID_1655	17	0	2.48	-0.51	-5.84
GRMZM2G392918	ID_1665	17	0	9.59	2.8	-5.19
GRMZM2G171170	ID_1672	17	0	4.91	1.13	-5.72
GRMZM2G156904	ID_1694	17	0	1.7	-0.37	-1.11
GRMZM5G862956	ID_1725	17	0	2.12	0.65	-3.43
GRMZM2G163304	ID_1744	17	0	4.65	0.52	-3.68
GRMZM2G055802	ID_1778	17	0	11.66	-10.58	-16.16
GRMZM5G852886	ID_1784	17	0	9	-4.42	-23.07
GRMZM2G368827	ID_1795	17	0	31.75	5.41	-10.63
GRMZM2G058402	ID_1804	17	0	8.62	-3.31	-12.12
GRMZM2G148561	ID_1812	17	0	4.8	0.45	-6.82
GRMZM2G053307	ID_1813	17	0	17.24	-5.27	-30.45
GRMZM2G161097	ID_1820	17	0	7.36	1.36	-2.15
GRMZM5G815665	ID_1889	17	0	0.9	0.49	-0.73
GRMZM2G022253	ID_32	21	0	92.9	90.76	91.33
GRMZM2G029720	ID_38	21	0	70.56	40.47	63.07
GRMZM5G809335	ID_60	21	0	47.78	28.71	41.06
GRMZM2G156861	ID_113	21	0	23.79	21.49	27.95
GRMZM2G427054	ID_125	21	0	18.84	17.07	19.74
GRMZM2G136364	ID_418	21	0	141.74	94.62	70.41
GRMZM2G069672	ID_652	21	0	6.36	6	4.55
GRMZM2G476523	ID_871	21	0	176.76	98.55	153.88
GRMZM2G106413	ID_960	21	0	19.32	9.64	10.31
GRMZM2G420571	ID_962	21	0	16.46	10.44	15.53
GRMZM2G106445	ID_990	21	0	13.69	10.57	9.05
GRMZM2G171365	ID_997	21	0	13.26	14.33	16.71
GRMZM2G003784	ID_1028	21	0	13.29	8.14	9.14
GRMZM2G440902	ID_1046	21	0	2.77	1.49	1.54
GRMZM2G044762	ID_1074	21	0	84.62	41.75	52.26
GRMZM2G180246	ID_1085	21	0	99.94	61.77	53.08
GRMZM2G154896	ID_1106	21	0	29.7	15.54	20.88
GRMZM2G319062	ID_1107	21	0	32.82	16.84	19.03
GRMZM2G158526	ID_1130	21	0	37.55	20.84	24.09
GRMZM2G026223	ID_1133	21	0	49.98	48.37	66.99
GRMZM5G868730	ID_1147	21	0	24.2	18.24	13.55
GRMZM2G168404	ID_1159	21	0	16.58	14.45	15.33
GRMZM2G472945	ID_1171	21	0	9.56	5.04	5.36
GRMZM2G016958	ID_1179	21	0	12.59	7.94	5.62
GRMZM2G067624	ID_1209	21	0	19.27	18.44	12.75
GRMZM2G114008	ID_1226	21	0	11.81	8.2	9.05
GRMZM2G431504	ID_1229	21	0	15.94	10.33	7.24
GRMZM2G047677	ID_1328	21	0	5.54	3.33	2.97
GRMZM2G700208	ID_1370	21	0	14.81	13.36	13.67
GRMZM2G121258	ID_1375	21	0	1.07	0.56	0.71
GRMZM2G154523	ID_1392	21	0	22.81	18.45	12.08
GRMZM2G039857	ID_1416	21	0	1.18	1.15	0.71
GRMZM2G132929	ID_1428	21	0	7.11	4.34	3.65
GRMZM2G162127	ID_1432	21	0	14.7	20.65	17.77
GRMZM2G150984	ID_1522	21	0	11.41	10.19	6.4
GRMZM2G120304	ID_1548	21	0	56.53	55.73	76.78
GRMZM2G003752	ID_1558	21	0	79.44	73.02	47.26
GRMZM2G014844	ID_1563	21	0	92.3	114.83	119.15
GRMZM2G062914	ID_1580	21	0	40.3	34.03	28.38
GRMZM2G153615	ID_1610	21	0	13.25	13.78	8.17
GRMZM2G050126	ID_1614	21	0	8.06	7.9	5.33
GRMZM2G015596	ID_1629	21	0	8.64	6.08	6.21
GRMZM2G167986	ID_1635	21	0	17.89	14.56	14.4
GRMZM2G016477	ID_1640	21	0	5.76	4.56	3.32
GRMZM2G054603	ID_1642	21	0	13.88	12.75	13.81
GRMZM2G078656	ID_1648	21	0	9.68	5.44	8.24
GRMZM2G123790	ID_1649	21	0	2.01	2.53	2.41
GRMZM2G043584	ID_1650	21	0	14.93	14.13	8.33
GRMZM2G111436	ID_1661	21	0	16.86	8.42	10.19
GRMZM2G129166	ID_1675	21	0	3.94	3.68	2.84
GRMZM2G171716	ID_1684	21	0	2.59	3.21	3.45
GRMZM2G059517	ID_1737	21	0	1.6	1.13	1.15
GRMZM2G465680	ID_1749	21	0	2.52	1.8	1.51
GRMZM2G064608	ID_1833	21	0	7.88	7.83	5.1
GRMZM2G084938	ID_1857	21	0	1.89	1.13	0.95
GRMZM2G113779	ID_261	25	0	6.29	9.36	14.13
GRMZM2G025132	ID_443	25	0	0.56	1.84	2.62
GRMZM2G020781	ID_444	25	0	0.32	1.17	1.9
GRMZM2G036991	ID_1609	25	0	4.35	14.96	18.05
GRMZM2G125300	ID_1818	25	0	61.2	92.93	141.41
GRMZM2G003368	ID_85	24	0	39.14	62.46	52.85
GRMZM2G060373	ID_465	24	0	11.64	31.7	32.03
GRMZM2G178497	ID_492	24	0	7.56	15.35	15.98
GRMZM2G147319	ID_810	24	0	1.01	3.28	3.22
GRMZM2G043127	ID_1537	24	0	103.1	315.26	217.22
GRMZM2G496319	ID_1540	24	0	282	415.1	369.52
GRMZM2G154890	ID_1599	24	0	7.47	12.25	10.36
GRMZM2G010657	ID_1692	24	0	2.83	3.99	3.63
GRMZM2G120918	ID_17	23	0	158.41	332.77	68.34
GRMZM2G092823	ID_224	23	0	5.89	8.15	3.67
GRMZM2G096016	ID_441	23	0	2.3	7.11	4.72
GRMZM2G059887	ID_454	23	0	79.38	107.45	74.19
GRMZM2G369260	ID_467	23	0	93.03	108.92	62.66
GRMZM2G116491	ID_679	23	0	0.95	6.72	3.37
GRMZM2G101499	ID_726	23	0	2.44	8.9	4.89
GRMZM2G101682	ID_1039	23	0	10.06	15.08	5.79
GRMZM2G153754	ID_1520	23	0	6.85	9.35	3.15
GRMZM2G042047	ID_1543	23	0	44.89	77.47	38.44
GRMZM2G008252	ID_1557	23	0	15.34	31.54	17.87
GRMZM2G150098	ID_1593	23	0	1.42	2.84	0.49
GRMZM2G590771	ID_1631	23	0	5.16	10.13	7.35
GRMZM2G359298	ID_1740	23	0	0.68	1.13	0.46
GRMZM2G175816	ID_1788	23	0	3.73	4.79	2.84
GRMZM2G079499	ID_1814	23	0	2.54	3.39	1.57
GRMZM2G565911	ID_1827	23	0	0.79	1.26	0.7
GRMZM2G455476	ID_1840	23	0	0.71	1.58	0.77
GRMZM2G560811	ID_14	22	0	164.82	92.88	347.34
GRMZM2G011624	ID_73	22	0	12.07	6.65	26.91
GRMZM2G404973	ID_76	22	0	18.08	11.17	22.59
GRMZM2G172448	ID_81	22	0	36.78	23.74	51.44
GRMZM2G035665	ID_88	22	0	28.9	11.22	48.01
GRMZM2G173649	ID_92	22	0	7.18	4.81	17.93
GRMZM2G034385	ID_105	22	0	23.33	11.64	52.61
GRMZM2G160032	ID_110	22	0	18.15	7.81	28.17
GRMZM2G115998	ID_128	22	0	11.24	4.42	20.31
GRMZM2G013463	ID_131	22	0	16.22	11.72	29.4
GRMZM2G589134	ID_139	22	0	6.89	4.41	16.36
GRMZM2G100505	ID_157	22	0	7.62	6.37	17.18
GRMZM2G154041	ID_159	22	0	8.65	6.77	17.44
GRMZM2G051738	ID_174	22	0	8.39	3.95	11.93
GRMZM2G318956	ID_206	22	0	3.65	2.51	6.8
GRMZM2G109332	ID_229	22	0	4.13	4.66	11.23
GRMZM2G449197	ID_348	22	0	1.59	0.94	2.66
GRMZM2G081151	ID_383	22	0	0.61	0.57	2.06
GRMZM2G137864	ID_457	22	0	70.6	31.01	110.76
GRMZM2G124744	ID_902	22	0	69.2	39.83	156.91
GRMZM2G163307	ID_912	22	0	36.08	39.9	58.58
GRMZM2G305280	ID_1505	22	0	61.37	52.98	119.07
GRMZM2G000710	ID_1576	22	0	2.95	2.43	4.71
GRMZM2G052105	ID_1589	22	0	12.13	11.21	26.22
GRMZM2G057237	ID_1623	22	0	3.88	3.93	7.14
GRMZM5G894932	ID_1670	22	0	1.2	1.39	4.07
GRMZM2G097129	ID_1690	22	0	2.3	0.97	3.71
GRMZM2G062613	ID_1721	22	0	0.62	0.72	1.77
GRMZM2G003306	ID_1817	22	0	185.34	120.1	431.99
GRMZM2G150688	ID_49	20	0	186.87	198.83	96.27
GRMZM2G099944	ID_74	20	0	3.13	1.85	-1.32
GRMZM2G138008	ID_376	20	0	1.74	1.2	-0.39
GRMZM2G148831	ID_431	20	0	5.56	5.37	-0.33
GRMZM2G031586	ID_459	20	0	65.75	85.1	15.35
GRMZM2G065557	ID_585	20	0	5.21	5	-1.94
GRMZM2G520811	ID_596	20	0	1.2	2.44	-1.12
GRMZM2G046286	ID_641	20	0	4.94	5.28	-2.72
GRMZM2G047713	ID_1013	20	0	134.35	78.49	27.44
GRMZM2G173809	ID_1018	20	0	69.01	41.02	14.87
GRMZM2G039919	ID_1090	20	0	78.5	65.12	37.48
GRMZM2G002147	ID_1099	20	0	57.86	34.28	4.94
GRMZM2G005715	ID_1113	20	0	42.76	24.69	6.04
GRMZM2G088309	ID_1115	20	0	30.58	21.19	2.88
GRMZM2G471089	ID_1119	20	0	35.04	24.18	10.54
GRMZM2G113196	ID_1161	20	0	15.76	10.83	6.41
GRMZM5G819523	ID_1167	20	0	12.52	10.83	2.52
GRMZM2G386995	ID_1170	20	0	10.82	8.66	-4.31
GRMZM5G827174	ID_1315	20	0	5.31	4.14	1.22
GRMZM2G085892	ID_1376	20	0	2.35	1.81	1.06
GRMZM2G110558	ID_1383	20	0	18.89	12.77	2.87
GRMZM2G162329	ID_1396	20	0	5.43	6.56	0.23
GRMZM5G876616	ID_1398	20	0	23.72	14.32	8.42
GRMZM2G060544	ID_1447	20	0	2.54	1.9	0.15
GRMZM2G163939	ID_1536	20	0	64.94	71.78	-37.74
GRMZM2G304575	ID_1538	20	0	207.16	147.44	23.6
GRMZM2G143627	ID_1562	20	0	20.18	21.55	-19.3
GRMZM2G157536	ID_1564	20	0	39.84	30.55	-0.2
GRMZM2G107756	ID_1607	20	0	7.32	12.14	-7.29
GRMZM2G048497	ID_1632	20	0	3.7	2.74	-1.42
GRMZM2G098084	ID_1639	20	0	4.69	10.82	-6.49
GRMZM2G427697	ID_1647	20	0	16.9	10.33	-4.8
GRMZM2G416791	ID_1654	20	0	9.5	13.62	2.43
GRMZM2G094867	ID_1667	20	0	2.45	5.72	-2.06
GRMZM2G142383	ID_1677	20	0	3.08	1.53	0.24
GRMZM2G004590	ID_1703	20	0	3.31	2.79	0.93
GRMZM2G051005	ID_1712	20	0	5.2	4.06	2.05
GRMZM2G323470	ID_1731	20	0	2.46	1.7	1.09
GRMZM2G476322	ID_1734	20	0	4.71	2.32	0.33
GRMZM2G361164	ID_1748	20	0	1.02	0.51	0
GRMZM2G010435	ID_1785	20	0	8.66	5.4	3.44
GRMZM2G070255	ID_1801	20	0	33.1	36.35	-11.23
GRMZM2G087101	ID_1836	20	0	8.48	10.08	2.73
GRMZM2G158316	ID_1838	20	0	12.29	14.16	5.92
GRMZM2G155525	ID_1872	20	0	10	15.97	-3.22
GRMZM5G800598	ID_1874	20	0	11.21	17.97	1.42
GRMZM2G105775	ID_1891	20	0	2.5	2.06	-2.35
GRMZM2G163406	ID_22	19	0	479.05	84.48	282.21
GRMZM2G058057	ID_31	19	0	27.01	2.97	52.62
GRMZM2G019538	ID_65	19	0	19.52	-2.03	20.21
GRMZM2G011355	ID_109	19	0	18.2	-2.11	22.7
GRMZM2G417715	ID_115	19	0	20.52	2.25	21.11
GRMZM2G008287	ID_129	19	0	24.85	1.07	12.83
GRMZM2G052255	ID_132	19	0	14.33	5.02	18.96
GRMZM2G015432	ID_154	19	0	24.36	8.8	19.86
GRMZM2G079889	ID_156	19	0	12.04	5.18	13.12
GRMZM2G138176	ID_158	19	0	19.68	8.66	17.52
GRMZM2G381933	ID_172	19	0	7.31	-0.29	8.47
GRMZM2G153760	ID_193	19	0	7.99	-0.55	8.77
GRMZM2G032865	ID_201	19	0	6.75	-0.78	9.98
GRMZM2G413253	ID_208	19	0	7.04	2.25	6.87
GRMZM2G045849	ID_223	19	0	12.69	2.32	7.67
GRMZM2G108997	ID_361	19	0	1.95	-0.29	2.96
GRMZM2G054548	ID_384	19	0	1.13	0.01	1.33
GRMZM2G137802	ID_430	19	0	3.15	-1.2	3.7
GRMZM2G134711	ID_651	19	0	1.32	0.09	1.11
GRMZM2G056799	ID_658	19	0	2.9	0.41	1.54
GRMZM2G116542	ID_685	19	0	3.75	-0.96	2.16
GRMZM2G009009	ID_687	19	0	0.96	-0.26	0.9
GRMZM2G144158	ID_756	19	0	1.07	0.05	0.59
GRMZM2G400718	ID_884	19	0	36.12	-4.76	24
GRMZM2G086202	ID_893	19	0	27.53	-4.54	35.9
GRMZM2G162535	ID_979	19	0	12.22	5.12	14.28
GRMZM2G100873	ID_1003	19	0	2.52	-0.3	1.59
GRMZM2G117956	ID_1026	19	0	9.25	1.78	5.86
GRMZM2G013750	ID_1086	19	0	44.46	-2.18	20.05
GRMZM5G895282	ID_1102	19	0	26.75	-2.59	18
GRMZM5G822449	ID_1112	19	0	24.01	6.5	14.98
GRMZM2G165069	ID_1174	19	0	28.28	4.25	21.46
GRMZM2G444567	ID_1251	19	0	11.41	3.51	10.59
GRMZM2G119339	ID_1281	19	0	6.75	-0.08	4.28
GRMZM2G359365	ID_1473	19	0	1.03	0.05	1.01
GRMZM2G174092	ID_1517	19	0	33.7	5.26	17.97
GRMZM2G077530	ID_1585	19	0	8.65	-0.58	15.49
GRMZM2G019356	ID_1600	19	0	30.48	14.74	28.29
GRMZM2G005947	ID_1605	19	0	9.24	2.78	5.96
GRMZM2G158562	ID_1651	19	0	6.42	-2.15	2.71
GRMZM2G063972	ID_1658	19	0	1.86	-0.78	2.88
GRMZM2G039746	ID_1663	19	0	4.6	-4.11	2.73
GRMZM2G069444	ID_1786	19	0	0.67	-0.86	0.83
GRMZM2G524978	ID_1800	19	0	16.23	-12.75	8.71
GRMZM2G121843	ID_1821	19	0	4.69	1.84	3.93
GRMZM2G026050	ID_1848	19	0	15.44	3.46	10.65
GRMZM2G116704	ID_1858	19	0	35.69	14.08	26.87
GRMZM2G002894	ID_1861	19	0	1.5	0.7	1.85
GRMZM2G083935	ID_80	18	0	13.36	5.83	-0.19
GRMZM2G127695	ID_138	18	0	6.85	-3.82	-3.86
GRMZM2G077776	ID_169	18	0	19.94	5.87	-0.27
GRMZM2G009958	ID_171	18	0	1.61	-0.07	0.46
GRMZM2G365162	ID_202	18	0	2.23	-0.02	0.04
GRMZM2G125813	ID_205	18	0	29.72	13.96	15.76
GRMZM2G121649	ID_235	18	0	0.83	-0.95	-0.15
GRMZM2G168744	ID_256	18	0	3.21	-1.2	-2
GRMZM2G136910	ID_428	18	0	91.39	1.87	-1.96
GRMZM2G026930	ID_429	18	0	3.34	-4.37	-1.12
GRMZM2G423898	ID_432	18	0	18.99	-8.38	-9.09
GRMZM2G044132	ID_435	18	0	33.61	0.98	2.64
GRMZM2G374971	ID_436	18	0	3.44	0.63	1.61
GRMZM2G502467	ID_445	18	0	5.25	0	0
AC233788.2_FG002	ID_447	18	0	2549.38	-920.15	-585.29
GRMZM2G324248	ID_458	18	0	157.78	-53.95	-30.46
GRMZM2G006676	ID_476	18	0	35.66	-15.71	-14.07
GRMZM2G045664	ID_477	18	0	27.21	-25.29	-13.23
GRMZM2G020940	ID_481	18	0	25.96	10.86	7.3
GRMZM2G144648	ID_486	18	0	32.45	-4	9.28
GRMZM2G339736	ID_487	18	0	30.44	-3.83	-11.84
GRMZM2G065989	ID_489	18	0	283.31	-1.99	-1.46
GRMZM2G071154	ID_496	18	0	15.22	-9.68	-8.15
GRMZM2G035579	ID_500	18	0	67.41	-2.7	0.63
GRMZM2G376825	ID_501	18	0	12.51	-7.37	-5.77
GRMZM2G104942	ID_502	18	0	26.57	1.96	-6.81
GRMZM2G405090	ID_505	18	0	45.43	-1.96	2.09
GRMZM2G436295	ID_512	18	0	80.56	2.47	1.96
GRMZM2G055204	ID_519	18	0	6.94	-6.09	-4.53
GRMZM2G171423	ID_532	18	0	46.82	-1.76	-2.22
GRMZM2G340807	ID_534	18	0	11.61	-8.55	-8.37
GRMZM2G134054	ID_536	18	0	142.8	30.12	19.83
GRMZM5G843302	ID_540	18	0	23.81	0.09	-3.14
GRMZM2G134797	ID_544	18	0	156.27	13.69	31.37
GRMZM2G051151	ID_552	18	0	11.73	-3.41	-2.31
GRMZM2G173063	ID_557	18	0	4.02	-2.59	-0.28
GRMZM2G123029	ID_570	18	0	14.88	0.72	3.4
GRMZM2G144024	ID_572	18	0	23.53	-3.43	-2.75
GRMZM2G111987	ID_580	18	0	11.32	-0.24	-2.78
GRMZM2G053987	ID_583	18	0	4.66	-1.63	-1.72
GRMZM2G132095	ID_587	18	0	10.24	-0.31	-2.11
GRMZM2G064962	ID_589	18	0	13.55	-2.58	-1.33
GRMZM2G050080	ID_595	18	0	2.94	-0.07	-0.02
GRMZM2G479529	ID_597	18	0	7.82	-0.36	-0.91
GRMZM2G016370	ID_605	18	0	15.3	-0.78	-0.38
GRMZM2G477503	ID_612	18	0	19.68	0.29	0.82
GRMZM2G135839	ID_617	18	0	10.8	1.69	1.94
GRMZM2G074017	ID_623	18	0	8.56	1.49	3.07
GRMZM2G475536	ID_626	18	0	45.82	2	2.09
GRMZM2G010555	ID_627	18	0	3.55	-2.06	-2.37
GRMZM5G829946	ID_628	18	0	17.49	2.08	1.23
GRMZM2G432060	ID_632	18	0	10.78	-8.35	-9.23
GRMZM2G311898	ID_634	18	0	7.85	-3.76	-4.61
GRMZM2G014022	ID_635	18	0	11.34	-1.26	-0.83
GRMZM2G042323	ID_643	18	0	14.48	1.14	1.02
GRMZM2G159119	ID_655	18	0	8.2	-0.54	-0.34
GRMZM2G115162	ID_662	18	0	1.98	-0.29	-0.27
GRMZM2G125001	ID_676	18	0	33.18	-0.4	0.19
GRMZM2G404603	ID_677	18	0	6.73	-4.9	-4.86
GRMZM2G031447	ID_680	18	0	1.09	-1.04	-0.25
GRMZM2G093101	ID_689	18	0	4	0.68	1.54
GRMZM2G379540	ID_695	18	0	0.83	-0.32	-0.35
GRMZM2G096753	ID_702	18	0	15.38	0.15	-0.05
GRMZM2G378106	ID_705	18	0	1.88	0.08	-0.02
GRMZM2G406099	ID_714	18	0	1.12	-0.61	-0.19
GRMZM2G476477	ID_716	18	0	2.79	-2.44	-2.34
GRMZM2G069694	ID_717	18	0	7.62	-2.22	-2.4
GRMZM2G156150	ID_719	18	0	15.43	0.27	0.85
AC233899.1_FG005	ID_723	18	0	1.23	-0.37	-0.42
GRMZM5G864815	ID_729	18	0	3.08	-0.41	0.34
GRMZM2G112377	ID_740	18	0	64.55	6.6	1.5
GRMZM2G155762	ID_742	18	0	0.72	-0.5	-0.07
GRMZM2G015908	ID_747	18	0	24.53	0.67	0.09
GRMZM2G027958	ID_760	18	0	0.85	-0.08	-0.35
GRMZM2G125653	ID_782	18	0	1.56	0.06	0.57
GRMZM2G356128	ID_790	18	0	5.24	0.19	-0.08
GRMZM2G370745	ID_800	18	0	1.42	-0.16	0.43
GRMZM2G326707	ID_801	18	0	4.31	0.23	-0.03
AC191575.2_FG001	ID_822	18	0	8.26	0.41	0.33
GRMZM2G333183	ID_826	18	0	1.39	0.02	0.02
GRMZM2G444819	ID_852	18	0	1.39	-0.44	-0.34
GRMZM2G015024	ID_883	18	0	43.33	-33.1	-3.53
GRMZM2G109388	ID_1000	18	0	47.24	-1.01	5.41
GRMZM2G050550	ID_1032	18	0	15.17	5.45	4.2
GRMZM2G024705	ID_1054	18	0	6.03	-0.39	-0.39
GRMZM2G493903	ID_1060	18	0	376.42	-273.71	-324.35
GRMZM2G112210	ID_1064	18	0	458.37	195.06	186.64
GRMZM2G172204	ID_1067	18	0	499.67	114.12	104.09
AC206201.3_FG004	ID_1073	18	0	408.97	25.93	-34.08
GRMZM5G851266	ID_1075	18	0	216.58	63.93	30.36
GRMZM2G169890	ID_1079	18	0	117.86	-3.48	-25.42
GRMZM2G025992	ID_1081	18	0	69.92	8.49	-12.25
GRMZM5G830403	ID_1087	18	0	21.76	3.88	-4.52
GRMZM2G119766	ID_1094	18	0	85.56	1.1	15.28
GRMZM2G389567	ID_1095	18	0	55.27	3.06	5.82
GRMZM2G163546	ID_1098	18	0	43.24	8.51	-7.77
GRMZM2G565940	ID_1103	18	0	84.93	17.49	0.35
GRMZM2G113863	ID_1104	18	0	47	17.71	24.58
GRMZM2G063462	ID_1120	18	0	31.87	8.96	12.86
GRMZM2G004012	ID_1121	18	0	37.44	-0.45	-4.88
GRMZM2G157517	ID_1122	18	0	23.44	-10.32	-10.12
GRMZM2G089698	ID_1134	18	0	41.73	13.9	7.56
GRMZM5G803308	ID_1141	18	0	21.8	6.1	-3.17
GRMZM2G101872	ID_1143	18	0	26.76	7.31	3.83
GRMZM5G813403	ID_1144	18	0	39.24	17.52	12.75
GRMZM2G053503	ID_1153	18	0	33.22	10.13	15.77
GRMZM5G852779	ID_1162	18	0	22.33	7.54	4.99
GRMZM2G031572	ID_1163	18	0	16.45	1.95	6.7
GRMZM2G146688	ID_1169	18	0	12.36	1.9	-0.52
GRMZM2G353885	ID_1185	18	0	13.13	-0.82	2.07
GRMZM2G377694	ID_1189	18	0	26.24	9.8	10.45
GRMZM2G030223	ID_1219	18	0	10.46	2.24	2.94
GRMZM2G701448	ID_1238	18	0	9.96	2.89	1.49
GRMZM2G109550	ID_1254	18	0	17.09	-0.9	0.14
GRMZM2G163761	ID_1264	18	0	9.62	3.69	1
GRMZM2G360023	ID_1267	18	0	6.71	-0.82	0.05
GRMZM2G314361	ID_1279	18	0	6.13	-1.4	-1.26
GRMZM2G071294	ID_1299	18	0	2.68	-0.13	0.52
GRMZM2G155490	ID_1301	18	0	6.9	0.63	1.16
GRMZM2G450825	ID_1306	18	0	3.57	0.09	1.52
GRMZM2G076621	ID_1317	18	0	3.7	0.85	1.56
GRMZM2G471304	ID_1319	18	0	2.07	-0.29	-0.47
GRMZM2G360680	ID_1337	18	0	2.56	0.31	0.68
GRMZM2G442129	ID_1343	18	0	3.22	-0.71	0.44
GRMZM2G173833	ID_1347	18	0	4.94	-0.18	0.98
GRMZM2G009141	ID_1351	18	0	2.63	-0.02	0.64
GRMZM2G084264	ID_1352	18	0	5.08	0.29	0.5
GRMZM2G400156	ID_1353	18	0	17.92	2.97	2.18
GRMZM2G056303	ID_1354	18	0	1.81	0.33	0.72
GRMZM2G065596	ID_1355	18	0	0.88	-0.18	-0.14
GRMZM2G039949	ID_1357	18	0	0.93	-0.27	-0.05
GRMZM2G112204	ID_1358	18	0	1.04	-0.04	0.24
GRMZM2G361855	ID_1361	18	0	1.59	0.18	0.22
GRMZM2G463640	ID_1368	18	0	31.05	-9.78	0.02
AC210669.3_FG001	ID_1426	18	0	137.78	-60.82	-22.74
GRMZM2G018820	ID_1429	18	0	326.12	20.5	2.39
GRMZM2G152447	ID_1434	18	0	336.6	29.73	33.39
GRMZM5G836174	ID_1435	18	0	102.53	0.28	-11.94
GRMZM2G040627	ID_1437	18	0	10.51	-0.77	1.39
GRMZM2G379428	ID_1438	18	0	5.27	-1.73	1.24
GRMZM2G060311	ID_1444	18	0	24.04	-1.6	-3.63
GRMZM2G145444	ID_1445	18	0	20.95	-13.76	-14.48
GRMZM2G325247	ID_1448	18	0	18.86	-9.79	-0.45
GRMZM5G828488	ID_1459	18	0	40.48	2.47	-0.17
GRMZM2G141320	ID_1465	18	0	51.4	3.32	4.17
GRMZM2G051619	ID_1489	18	0	4.33	-0.88	-1.94
GRMZM2G135586	ID_1491	18	0	10.64	0.58	0.1
GRMZM2G401026	ID_1498	18	0	4.65	-0.51	-0.32
GRMZM2G034015	ID_1507	18	0	55.86	-9.73	-6.13
GRMZM2G427451	ID_1515	18	0	59.09	2.01	2.25
GRMZM2G413006	ID_1519	18	0	35.52	-7.89	-7.6
GRMZM2G124566	ID_1523	18	0	38.25	5	10.53
GRMZM2G178432	ID_1526	18	0	12.56	-8.69	-9.11
GRMZM2G073788	ID_1529	18	0	5.63	0.85	1.41
GRMZM2G119782	ID_1551	18	0	84.16	16.73	-6.14
GRMZM2G166035	ID_1569	18	0	30.5	10.18	2.58
GRMZM2G078274	ID_1571	18	0	99.75	9.49	23.85
GRMZM2G134389	ID_1596	18	0	3.68	-3.19	-2.89
GRMZM2G030809	ID_1603	18	0	5.26	-3.05	-1.34
GRMZM2G066602	ID_1606	18	0	11.34	1.39	3.21
GRMZM2G042008	ID_1611	18	0	20.44	8.07	5.05
GRMZM2G129083	ID_1615	18	0	42.44	15.7	-1.61
GRMZM2G128651	ID_1617	18	0	34.42	5.88	8.42
GRMZM2G059556	ID_1619	18	0	6.13	-3.92	-2.74
GRMZM2G150011	ID_1645	18	0	6.64	3.62	2.58
GRMZM5G891295	ID_1652	18	0	7.92	-5.17	-0.42
GRMZM2G351990	ID_1686	18	0	2.1	0.47	0.13
GRMZM2G171408	ID_1695	18	0	2.96	-2.73	-1.6
GRMZM2G463445	ID_1701	18	0	10.78	3.3	0.46
GRMZM2G098527	ID_1713	18	0	2.53	0.33	1.2
GRMZM2G062541	ID_1726	18	0	2.99	-1.97	-1.62
GRMZM2G156377	ID_1756	18	0	4.33	0.02	-0.67
GRMZM2G445958	ID_1793	18	0	36.09	12.75	16.94
AC220927.3_FG007	ID_1794	18	0	162.65	-18.84	-69.67
GRMZM2G149698	ID_1803	18	0	31.53	-2.39	5.8
GRMZM2G083285	ID_1815	18	0	4.46	0.21	1.47
GRMZM2G110567	ID_1819	18	0	167.32	36.9	-2.94
GRMZM2G085301	ID_1823	18	0	3.54	1.66	1.19
GRMZM2G319878	ID_1826	18	0	8.64	2.48	-0.55
GRMZM2G088539	ID_1831	18	0	4.24	0.3	0.38
GRMZM2G314328	ID_1837	18	0	39.82	-0.17	7.1
AC210168.4_FG003	ID_1876	18	0	132.25	11.81	3.57
GRMZM2G081536	ID_58	16	0	-6.59	15.19	63.15
GRMZM5G801031	ID_66	16	0	2.24	4.84	13.09
GRMZM2G099206	ID_335	16	0	-0.5	0.76	1.31
GRMZM2G411764	ID_413	16	0	-15.77	25.87	111.44
GRMZM2G170400	ID_421	16	0	13.14	64.61	111.89
GRMZM2G109787	ID_1234	16	0	0.29	1.85	2.87
GRMZM2G004301	ID_1406	16	0	1.84	4.3	9.05
GRMZM2G430685	ID_1566	16	0	-1.67	17.67	58.57
GRMZM2G083745	ID_1608	16	0	-0.98	1.74	3.05
GRMZM2G438755	ID_1696	16	0	0.26	1.23	3.48
GRMZM2G151567	ID_1733	16	0	0.63	1.92	3.52
GRMZM2G150004	ID_1830	16	0	0.14	0.95	1.49
GRMZM2G469224	ID_238	15	0	-0.15	1.86	2.18
GRMZM2G055570	ID_406	15	0	-0.59	1.85	1.39
AC206285.3_FG005	ID_440	15	0	-0.83	1.66	1.8
GRMZM2G094074	ID_456	15	0	-10.86	22.33	30.87
GRMZM5G883632	ID_537	15	0	-0.57	5.86	3.88
GRMZM2G315088	ID_560	15	0	-1.94	9.22	7.79
GRMZM2G393349	ID_578	15	0	0.48	2.68	1.99
GRMZM2G104610	ID_720	15	0	0.38	18.68	18.1
AC215309.3_FG001	ID_829	15	0	-0.56	0.93	0.66
GRMZM2G149624	ID_1016	15	0	-12.93	40.46	20.03
GRMZM2G439884	ID_1127	15	0	-5.66	6.97	6.8
GRMZM2G431412	ID_1146	15	0	-1.04	15.42	20.01
GRMZM2G459828	ID_1201	15	0	-0.78	2.98	1.95
GRMZM2G104616	ID_1216	15	0	-2.68	5.73	6.14
GRMZM2G093574	ID_1364	15	0	-14.47	21.28	24.51
GRMZM2G177098	ID_1546	15	0	-8.89	40.48	36.69
GRMZM2G067476	ID_1552	15	0	-9.15	15.49	16.47
GRMZM2G087552	ID_1671	15	0	-0.22	1.45	1.52
AC231747.1_FG001	ID_1702	15	0	-0.53	0.71	0.27
GRMZM2G180422	ID_1824	15	0	0.38	3.81	2.23
GRMZM2G382273	ID_1864	15	0	-0.43	0.58	0.21
GRMZM2G066469	ID_1873	15	0	-1.84	4.49	2.56
GRMZM2G068471	ID_34	14	0	-30.36	37.28	-24.94
GRMZM2G703490	ID_123	14	0	-3.87	7.52	-0.9
GRMZM2G171110	ID_140	14	0	-2.62	4.82	-5.26
GRMZM2G043921	ID_165	14	0	0.07	7.57	-2.12
GRMZM2G048335	ID_166	14	0	0.23	4.54	-1.41
GRMZM2G071268	ID_192	14	0	-0.53	2.5	-1.86
GRMZM2G499182	ID_211	14	0	-1.77	1.83	-1.15
GRMZM2G170567	ID_213	14	0	-1.71	2.23	-1.8
GRMZM2G379804	ID_218	14	0	-1	1.82	-0.89
GRMZM2G151516	ID_442	14	0	-0.78	1.09	-0.98
AC208204.3_FG006	ID_488	14	0	13.35	51.17	3.45
GRMZM2G023194	ID_491	14	0	-1.44	5.44	-4.9
GRMZM2G322817	ID_533	14	0	-1.08	5.93	1.79
GRMZM2G097135	ID_813	14	0	-0.23	1.62	-0.41
GRMZM2G091313	ID_1035	14	0	-1.44	2.1	-0.79
GRMZM2G103512	ID_1145	14	0	-9.44	11.1	1.34
GRMZM2G049913	ID_1192	14	0	-4.93	7.37	-1.17
AC194402.2_FG004	ID_1197	14	0	-3.51	4.87	-0.92
GRMZM2G477879	ID_1221	14	0	-3.38	3.61	-0.51
GRMZM2G422539	ID_1224	14	0	-1.44	2.62	-0.17
GRMZM2G319167	ID_1265	14	0	-0.96	1.04	-0.58
GRMZM2G024466	ID_1292	14	0	-0.81	1.5	0.05
GRMZM2G142802	ID_1384	14	0	1.13	24.17	-9.77
GRMZM2G380784	ID_1484	14	0	-1.13	2.94	-1.73
GRMZM2G007249	ID_1486	14	0	-0.85	2.68	0.47
GRMZM2G156692	ID_1527	14	0	0.07	1.58	-0.17
GRMZM2G417682	ID_1528	14	0	-0.71	2.4	0.77
GRMZM5G898755	ID_1555	14	0	-37.35	95.85	-40.59
GRMZM2G035314	ID_1643	14	0	-0.26	3.81	0.21
GRMZM2G136389	ID_1708	14	0	-0.32	1.82	0.48
GRMZM2G702514	ID_1890	14	0	-0.45	2.58	-1.29
GRMZM5G863656	ID_4	13	0	-27.63	-0.35	276.02
GRMZM2G556667	ID_45	13	0	-9.92	4.79	64.83
GRMZM5G877985	ID_47	13	0	30.95	3.81	71.59
GRMZM2G589470	ID_54	13	0	6.77	1.04	28.47
GRMZM2G003835	ID_102	13	0	7.26	-6.56	51.14
GRMZM2G100336	ID_122	13	0	-2.7	-5.65	7.87
GRMZM2G127180	ID_141	13	0	2.68	-1.29	8.33
GRMZM5G878582	ID_153	13	0	4.49	2.9	19.08
GRMZM2G016640	ID_164	13	0	2.29	-0.32	12.95
GRMZM2G075489	ID_175	13	0	3.51	0.58	12.4
GRMZM2G023557	ID_194	13	0	-2.4	0.7	13
GRMZM2G145012	ID_262	13	0	-0.46	-0.23	12.26
GRMZM2G131715	ID_306	13	0	1.11	-0.91	3.01
GRMZM2G001304	ID_363	13	0	-0.3	-0.2	1.51
GRMZM2G101511	ID_369	13	0	0.72	0.43	2.18
GRMZM2G425482	ID_469	13	0	2.4	-1.03	8.01
GRMZM2G531230	ID_520	13	0	0.15	1.33	5.63
GRMZM2G133400	ID_523	13	0	4.33	-0.04	13.61
GRMZM2G083402	ID_758	13	0	-0.2	-0.73	0.67
GRMZM2G041866	ID_1339	13	0	-0.15	-0.55	2.32
GRMZM2G313101	ID_1394	13	0	-2.97	-1.61	29.32
GRMZM2G510796	ID_1402	13	0	0.29	-1.58	15.06
GRMZM2G100467	ID_1539	13	0	25.31	6.17	60.14
GRMZM2G043822	ID_5	12	0	12.19	50.79	-72.7
GRMZM2G106133	ID_7	12	0	-25.42	48.12	-87.92
GRMZM2G078876	ID_25	12	0	-6.23	7.33	-70.43
GRMZM2G380414	ID_26	12	0	-17.82	1.42	-85.15
GRMZM5G853513	ID_46	12	0	2	5.01	-19.04
GRMZM2G016817	ID_50	12	0	2.66	22.63	-30.87
GRMZM2G033570	ID_53	12	0	7.25	5.71	-15.22
GRMZM2G138220	ID_55	12	0	-2.95	-7.14	-32.76
GRMZM2G077127	ID_59	12	0	-4.65	2.59	-21.08
GRMZM2G003631	ID_64	12	0	-5.48	-1.12	-32.07
GRMZM2G110626	ID_86	12	0	-1.07	2.24	-6.68
AC215690.3_FG002	ID_90	12	0	0.73	4.37	-7.89
GRMZM2G143357	ID_95	12	0	0.95	1.62	-9.92
GRMZM2G019183	ID_149	12	0	-0.53	-0.22	-2.86
GRMZM2G164229	ID_232	12	0	-0.19	-0.36	-2.44
GRMZM2G320298	ID_236	12	0	-0.97	0.11	-3.62
GRMZM2G331638	ID_266	12	0	-1.34	-0.29	-3.71
GRMZM2G320269	ID_279	12	0	0.4	-0.12	-1.61
GRMZM2G477837	ID_410	12	0	-0.61	-0.28	-3.43
GRMZM2G112609	ID_564	12	0	1.9	2.61	-3.72
GRMZM5G884600	ID_613	12	0	1.22	4.02	-4.79
GRMZM2G119705	ID_674	12	0	1.01	3.27	-2.82
GRMZM2G355773	ID_1066	12	0	47.54	16.23	-120.4
AC217050.4_FG006	ID_1379	12	0	0.29	36.2	-49.11
GRMZM2G171664	ID_1391	12	0	-1.16	-6.99	-35.94
GRMZM2G053939	ID_1395	12	0	-5.12	-0.08	-11.55
GRMZM2G176737	ID_1400	12	0	0.44	0.22	-1.7
AC190750.2_FG014	ID_1404	12	0	0.79	1.02	-1.33
GRMZM2G040673	ID_1490	12	0	1.18	1.72	-1.75
GRMZM2G330635	ID_1550	12	0	-1.46	0.3	-18.93
GRMZM2G084521	ID_1591	12	0	2.02	0.74	-11.19
GRMZM2G154223	ID_1633	12	0	4.83	10.81	-20.84
GRMZM2G047434	ID_1641	12	0	2.97	2.08	-4.88
GRMZM2G145133	ID_1657	12	0	2.24	-1.88	-11.21
GRMZM2G078279	ID_1693	12	0	-2.22	-1.04	-6.86
GRMZM2G026804	ID_1719	12	0	0.03	-0.06	-0.98
GRMZM5G894619	ID_1769	12	0	-0.84	0.47	-2.25
GRMZM2G082487	ID_1770	12	0	0.72	0.39	-1.75
GRMZM2G167649	ID_1792	12	0	34.89	73.09	-74
GRMZM2G107336	ID_62	11	0	-1.48	-13.12	6.89
GRMZM2G155783	ID_118	11	0	3.36	-6.07	0.21
GRMZM2G089982	ID_119	11	0	2.82	-6.44	-0.81
GRMZM2G062396	ID_437	11	0	1.11	-1.51	-0.08
GRMZM2G034764	ID_510	11	0	3.56	-15.51	-5.02
GRMZM2G135743	ID_535	11	0	-0.75	-7.64	-3.22
GRMZM2G404126	ID_555	11	0	2.3	-13.37	-4.32
GRMZM2G462760	ID_602	11	0	1.87	-7.03	1.23
GRMZM5G878558	ID_609	11	0	0.6	-3.8	-1.04
GRMZM2G399383	ID_618	11	0	-0.21	-3.33	-1.21
GRMZM2G377904	ID_624	11	0	0.11	-6.23	-2.42
GRMZM2G031280	ID_638	11	0	1.92	-2.13	0.74
GRMZM2G159700	ID_660	11	0	0.56	-1.05	-0.3
GRMZM2G144668	ID_682	11	0	-0.18	-1.78	-0.6
GRMZM2G323387	ID_691	11	0	1.67	-4.38	-1.48
GRMZM2G177227	ID_745	11	0	-0.38	-1.54	-0.23
GRMZM2G040736	ID_754	11	0	-0.44	-1.42	-0.07
GRMZM2G013798	ID_916	11	0	5	-10.72	-1.56
GRMZM2G001850	ID_1068	11	0	2.44	-62.61	1.91
GRMZM2G124576	ID_1097	11	0	2.79	-13.78	-1.7
GRMZM2G085460	ID_1411	11	0	3.11	-3.66	0.97
GRMZM2G059964	ID_1574	11	0	-3.52	-14.3	-1.76
AC155352.2_FG010	ID_1581	11	0	15.2	-22.35	17.84
GRMZM2G008657	ID_1602	11	0	7.03	-9.18	7.9
GRMZM2G399921	ID_1698	11	0	-3.78	-8.38	-0.1
GRMZM2G070673	ID_1771	11	0	-0.38	-1.18	0
GRMZM2G154667	ID_1796	11	0	18.17	-20.13	2.39
GRMZM2G010348	ID_36	8	0	-20.55	-2.67	37.3
GRMZM5G861451	ID_84	8	0	-11.4	-3.47	11.61
GRMZM2G146511	ID_326	8	0	-0.64	-0.12	0.85
GRMZM2G145632	ID_340	8	0	-0.81	-0.12	1.14
GRMZM2G338160	ID_433	8	0	-1.7	1.89	3
GRMZM2G119169	ID_463	8	0	-26.29	-12.63	10
GRMZM2G344279	ID_546	8	0	-3.14	1.02	5.36
GRMZM2G162276	ID_1062	8	0	-98.07	-17.7	42.58
GRMZM2G049915	ID_1070	8	0	-102.72	-58.5	45.12
GRMZM2G025231	ID_1181	8	0	-3.68	-1.4	3.84
GRMZM5G876450	ID_1275	8	0	-0.66	0.34	0.74
GRMZM5G836567	ID_1318	8	0	-0.4	0.01	1.05
GRMZM2G153648	ID_1561	8	0	-16.4	6.81	32.6
GRMZM2G070807	ID_1595	8	0	-2.65	1.28	2.37
GRMZM2G082032	ID_1822	8	0	-12.67	0.27	28.49
GRMZM2G322090	ID_96	7	0	-7.14	5.16	-1.58
GRMZM2G355771	ID_222	7	0	-2.27	-0.42	-0.95
GRMZM5G836827	ID_233	7	0	-2.8	-0.67	-1.39
GRMZM2G379964	ID_276	7	0	-1.2	0.38	0.11
GRMZM2G368678	ID_296	7	0	-1.8	-0.18	-0.86
GRMZM2G091383	ID_453	7	0	-63.11	-25.08	-13.53
GRMZM2G075630	ID_455	7	0	-75.44	12.87	22.39
GRMZM2G356817	ID_894	7	0	-24.96	1.48	-7.86
GRMZM2G432774	ID_943	7	0	-5.49	1.48	-1.93
AC199001.3_FG005	ID_951	7	0	-6.39	-1.99	-3.44
GRMZM5G835794	ID_989	7	0	-1.49	0.44	-0.29
GRMZM2G099463	ID_1089	7	0	-18.53	-0.31	-1.17
AC210193.4_FG002	ID_1100	7	0	-18.08	2.66	-5.85
GRMZM5G866581	ID_1109	7	0	-14.24	7.07	0.09
GRMZM2G001934	ID_1128	7	0	-7.16	1.39	-2.07
GRMZM2G078320	ID_1140	7	0	-7.68	4.03	-1.82
GRMZM2G029455	ID_1142	7	0	-6.74	5.12	-0.46
AC186164.3_FG001	ID_1150	7	0	-7.26	-0.72	-2.79
GRMZM5G874896	ID_1155	7	0	-10.28	1.01	-3.23
GRMZM2G310795	ID_1176	7	0	-8.61	2.31	-1.02
GRMZM5G801091	ID_1180	7	0	-4	4.99	1.87
GRMZM2G414866	ID_1200	7	0	-4.46	-0.26	-1.75
AC197545.3_FG002	ID_1204	7	0	-3.15	1.1	-0.44
GRMZM2G553687	ID_1218	7	0	-3.84	-1.59	-2.11
GRMZM2G147867	ID_1220	7	0	-4.64	-1.93	-2.34
GRMZM2G007922	ID_1228	7	0	-2.99	-0.36	-0.78
GRMZM2G312026	ID_1231	7	0	-3.29	0.52	-0.97
GRMZM2G082580	ID_1232	7	0	-4.79	-1.06	-1.97
GRMZM2G339545	ID_1233	7	0	-5.28	0.45	-1.24
GRMZM2G343974	ID_1242	7	0	-1.78	1.64	0.82
GRMZM2G117680	ID_1244	7	0	-2.24	0.77	0.06
GRMZM2G440943	ID_1245	7	0	-2.38	0.66	-0.82
GRMZM2G120110	ID_1248	7	0	-1.43	-0.75	-0.53
AC234175.1_FG010	ID_1253	7	0	-2.38	0.93	-0.06
GRMZM2G024612	ID_1255	7	0	-2.89	-0.3	-1.31
GRMZM2G373322	ID_1256	7	0	-2.38	0	-1.01
GRMZM2G384516	ID_1258	7	0	-1.64	1.49	0
GRMZM2G325786	ID_1263	7	0	-1.63	1.23	0.7
GRMZM2G177771	ID_1269	7	0	-1.3	-0.24	-0.53
GRMZM2G451443	ID_1273	7	0	-1.64	-0.54	-0.74
GRMZM2G340353	ID_1280	7	0	-2.34	-1.08	-1.19
GRMZM2G053722	ID_1283	7	0	-2.65	-1.07	-1.46
GRMZM2G111984	ID_1285	7	0	-0.91	0.45	0.41
GRMZM2G331088	ID_1287	7	0	-2.9	0.28	-1.19
GRMZM2G365053	ID_1288	7	0	-1.54	-0.75	-0.47
GRMZM2G401769	ID_1293	7	0	-1.56	0.04	-0.51
GRMZM2G153575	ID_1298	7	0	-2.21	-0.64	-0.88
AC205730.3_FG002	ID_1300	7	0	-0.6	0.6	0.1
GRMZM2G332687	ID_1302	7	0	-1.36	1.46	0.34
GRMZM2G422537	ID_1305	7	0	-0.88	0.69	0.11
GRMZM2G397368	ID_1307	7	0	-1.91	-0.55	-0.45
GRMZM2G167318	ID_1308	7	0	-1.33	1.11	0.13
GRMZM2G398024	ID_1311	7	0	-1.01	0.2	-0.12
GRMZM2G356423	ID_1320	7	0	-1.42	0.53	-0.18
GRMZM2G445491	ID_1323	7	0	-0.77	0.48	-0.08
GRMZM2G420181	ID_1326	7	0	-0.72	0.56	-0.01
GRMZM2G156310	ID_1332	7	0	-1.23	-0.67	-0.52
GRMZM2G063322	ID_1371	7	0	-1.18	0.51	0.17
GRMZM2G302712	ID_1422	7	0	-77.02	26.88	18.5
GRMZM2G063340	ID_1424	7	0	-88.94	16.03	-14.01
GRMZM2G010801	ID_1513	7	0	-13.95	2.5	-2.2
AC203909.3_FG006	ID_1516	7	0	-7.35	0.86	2.76
GRMZM2G365983	ID_1531	7	0	-1.08	0.72	0.18
GRMZM2G069649	ID_1674	7	0	-6.91	-1.29	-2.39
GRMZM2G356142	ID_1798	7	0	-12.58	0.13	-3.23
GRMZM2G086702	ID_1859	7	0	-2.05	-0.38	-0.56
GRMZM2G513713	ID_152	5	0	-7.72	-7.07	4.15
GRMZM2G084935	ID_244	5	0	-1.89	-1.75	-0.78
GRMZM2G348125	ID_249	5	0	-0.89	-0.73	0.59
GRMZM2G170826	ID_427	5	0	-0.93	-1.85	0.13
GRMZM2G006745	ID_579	5	0	-4.23	-3.36	1.13
GRMZM2G059590	ID_669	5	0	-1.3	-1.4	-0.65
GRMZM2G139675	ID_773	5	0	-1.23	-0.66	0.06
GRMZM2G017197	ID_815	5	0	-0.81	-1.2	0.75
GRMZM2G120079	ID_952	5	0	-1.68	-2.44	0.59
GRMZM2G060265	ID_994	5	0	-3.07	-2.26	-1.02
GRMZM2G123558	ID_1156	5	0	-5.94	-6.52	-1.82
GRMZM2G049790	ID_1199	5	0	-4.07	-3.44	-1.87
GRMZM2G051782	ID_1249	5	0	-2.6	-2.27	-0.82
GRMZM2G148098	ID_1257	5	0	-1.34	-0.8	-0.27
GRMZM2G401664	ID_1270	5	0	-1.96	-2.55	-0.77
GRMZM2G430807	ID_1387	5	0	-18.15	-17.29	-1.64
GRMZM2G097884	ID_1506	5	0	-70.82	-49.98	-9.97
GRMZM2G085661	ID_1508	5	0	-8.23	-7.24	-3.65
GRMZM2G042118	ID_1559	5	0	-74.11	-45.07	-15.39
GRMZM2G170927	ID_1662	5	0	-7.18	-5.96	3.85
GRMZM2G054678	ID_1700	5	0	-5.34	-4.96	-1.75
GRMZM2G070912	ID_1791	5	0	-358.11	-244.97	83.22
GRMZM2G086450	ID_1862	5	0	-1.95	-1.2	-0.41
GRMZM2G131087	ID_181	2	0	-1.71	-4.52	-2.4
GRMZM2G099483	ID_230	2	0	-2.11	-3.53	-2.27
GRMZM2G075925	ID_381	2	0	-0.55	-1.14	-0.68
GRMZM2G175642	ID_493	2	0	-11.67	-21.81	-4.89
GRMZM2G069018	ID_509	2	0	-4.1	-14.44	-8.76
GRMZM2G104118	ID_521	2	0	-6.92	-11.45	-5.98
GRMZM2G077809	ID_563	2	0	-2.34	-4.17	-2.97
GRMZM5G821439	ID_607	2	0	-1.6	-2.18	-1.08
GRMZM5G885700	ID_631	2	0	-0.38	-1.99	-1.19
GRMZM2G304474	ID_640	2	0	-3.21	-6.81	-3.47
GRMZM2G048450	ID_654	2	0	-0.84	-2.01	-0.87
GRMZM5G874270	ID_673	2	0	-1.23	-3.98	-2.05
GRMZM2G069511	ID_698	2	0	-0.71	-1.74	-1.02
GRMZM2G180080	ID_700	2	0	-0.65	-1.9	-0.73
GRMZM2G163418	ID_728	2	0	-0.71	-1.76	-0.96
GRMZM2G702991	ID_738	2	0	-1.72	-2.41	-1.75
GRMZM2G041549	ID_744	2	0	-0.63	-1.14	-0.74
GRMZM2G114036	ID_771	2	0	-1.32	-2.02	-1.39
GRMZM2G476636	ID_802	2	0	-1.21	-1.76	-0.72
GRMZM2G164814	ID_975	2	0	-2.08	-2.71	-1.23
GRMZM2G103617	ID_1009	2	0	-33.4	-50.93	-39.73
GRMZM2G106950	ID_1020	2	0	-8.88	-13.58	-9.82
GRMZM2G086876	ID_1029	2	0	-1.14	-1.64	-1.16
GRMZM2G088819	ID_1043	2	0	-1.97	-2.56	-1.52
GRMZM2G141499	ID_1117	2	0	-1.61	-11.89	-5.57
GRMZM2G080530	ID_1175	2	0	-1.69	-3.13	-2.23
GRMZM2G055698	ID_1207	2	0	-3.52	-4.84	-3.29
GRMZM2G478553	ID_1373	2	0	-0.62	-1.94	-1.15
GRMZM2G177631	ID_1442	2	0	-10.98	-13.88	-8.56
GRMZM2G097141	ID_1518	2	0	-3.63	-5.81	-3.45
GRMZM2G057865	ID_1554	2	0	-26.64	-49.15	-13.39
GRMZM2G073427	ID_1687	2	0	-10.59	-14.36	-9.35
GRMZM2G106526	ID_1704	2	0	-2.04	-4.18	-2.24
GRMZM2G179521	ID_1730	2	0	-1.12	-2.98	-1.4
GRMZM2G112965	ID_1743	2	0	-1.89	-2.78	-1.54
GRMZM2G085381	ID_1867	2	0	-4.28	-6.41	-1.78
